# Supplementary material for: ”Känner du dig välkommen?” – En undersökning om användares upplevelser och åsikter av miljön och servicen i Högskolebiblioteket i Halmstad
Source: publisher site journal article supplement (doi:10.18632/aging.205834), 2002-01-01
Supplement: Supplementary file [file aging-v16i10-205834-supplementary-material-SD1.pdf]

## SUPPLEMENTARY TABLE

**Supplementary Table 1. Gene for cuproptosis.**

---

FDX1  
LIPT1  
LIAS  
DLD  
DBT  
GCSH  
DLST  
DLAT  
PDHA1  
PDHB  
SLC31A1  
ATP7A  
ATP7B

---
