# Supplementary material for: A cuproptosis-based prognostic model for predicting survival in low-grade glioma
Source: Aging (Albany NY). 2024 May 9;16(10):8697–716. doi: 10.18632/aging.205834 (PMC11164498; doi:10.18632/aging.205834)
Supplement: Supplementary Table 2 [file aging-16-205834-s002.xlsx]

## Sheet: Sheet1
Supplementary Table 2. TCGA clinical data.
Id	futime	fustat	Age	Gender	Grade	Stage	T	M	N
TCGA-DU-A7TI	1183	1	32	MALE	G3	unknow	unknow	unknow	unknow
TCGA-S9-A7J2	62	0	25	MALE	G3	unknow	unknow	unknow	unknow
TCGA-P5-A730	333	0	22	MALE	G3	unknow	unknow	unknow	unknow
TCGA-HT-7474	114	0	52	MALE	G2	unknow	unknow	unknow	unknow
TCGA-TM-A84C	492	1	32	MALE	G2	unknow	unknow	unknow	unknow
TCGA-TQ-A7RG	599	0	36	MALE	G2	unknow	unknow	unknow	unknow
TCGA-HT-A74O	3	0	34	MALE	G3	unknow	unknow	unknow	unknow
TCGA-S9-A7J3	629	0	52	FEMALE	G3	unknow	unknow	unknow	unknow
TCGA-CS-6666	1428	0	22	MALE	G3	unknow	unknow	unknow	unknow
TCGA-FG-7637	1219	0	49	MALE	G2	unknow	unknow	unknow	unknow
TCGA-FG-A6IZ	457	0	60	MALE	G2	unknow	unknow	unknow	unknow
TCGA-S9-A6UB	3761	0	52	MALE	G2	unknow	unknow	unknow	unknow
TCGA-TQ-A7RP	914	0	66	MALE	G2	unknow	unknow	unknow	unknow
TCGA-DU-7015	2761	0	41	FEMALE	G2	unknow	unknow	unknow	unknow
TCGA-HT-7857	7	0	24	FEMALE	G3	unknow	unknow	unknow	unknow
TCGA-CS-4943	1106	1	37	MALE	G3	unknow	unknow	unknow	unknow
TCGA-P5-A77W	584	0	37	FEMALE	G3	unknow	unknow	unknow	unknow
TCGA-HT-7884	343	0	44	FEMALE	G2	unknow	unknow	unknow	unknow
TCGA-DU-7007	1915	1	33	MALE	G2	unknow	unknow	unknow	unknow
TCGA-FG-A6J1	500	0	44	FEMALE	G2	unknow	unknow	unknow	unknow
TCGA-E1-5304	1251	1	42	MALE	G3	unknow	unknow	unknow	unknow
TCGA-E1-5322	3978	1	38	FEMALE	G2	unknow	unknow	unknow	unknow
TCGA-HT-8558	418	0	29	FEMALE	G2	unknow	unknow	unknow	unknow
TCGA-CS-5394	8	0	40	MALE	G3	unknow	unknow	unknow	unknow
TCGA-QH-A6X9	58	0	73	FEMALE	G2	unknow	unknow	unknow	unknow
TCGA-TM-A84F	1796	0	48	MALE	G3	unknow	unknow	unknow	unknow
TCGA-S9-A6TZ	1120	0	39	FEMALE	G2	unknow	unknow	unknow	unknow
TCGA-DU-7294	2869	0	53	FEMALE	G2	unknow	unknow	unknow	unknow
TCGA-TQ-A7RN	1026	0	32	MALE	G2	unknow	unknow	unknow	unknow
TCGA-TM-A7C3	1666	1	43	FEMALE	G3	unknow	unknow	unknow	unknow
TCGA-DB-A75M	544	0	47	MALE	G2	unknow	unknow	unknow	unknow
TCGA-DU-A5TS	964	0	42	MALE	G2	unknow	unknow	unknow	unknow
TCGA-DB-A4XD	1210	0	32	MALE	G3	unknow	unknow	unknow	unknow
TCGA-DH-5142	1943	0	29	MALE	G3	unknow	unknow	unknow	unknow
TCGA-WY-A85D	1147	0	60	MALE	G2	unknow	unknow	unknow	unknow
TCGA-P5-A5F0	287	0	33	MALE	G2	unknow	unknow	unknow	unknow
TCGA-HT-7476	199	0	26	MALE	G2	unknow	unknow	unknow	unknow
TCGA-TM-A84G	1236	0	54	FEMALE	G3	unknow	unknow	unknow	unknow
TCGA-VM-A8CF	609	0	44	FEMALE	G3	unknow	unknow	unknow	unknow
TCGA-DB-A64W	438	1	65	FEMALE	G3	unknow	unknow	unknow	unknow
TCGA-HT-7482	3253	0	18	FEMALE	G2	unknow	unknow	unknow	unknow
TCGA-QH-A65R	461	0	38	FEMALE	G3	unknow	unknow	unknow	unknow
TCGA-QH-A6CZ	279	0	38	MALE	G2	unknow	unknow	unknow	unknow
TCGA-S9-A6U0	742	1	46	MALE	G3	unknow	unknow	unknow	unknow
TCGA-QH-A6CV	442	0	51	MALE	G3	unknow	unknow	unknow	unknow
TCGA-S9-A6TS	1891	1	48	FEMALE	G3	unknow	unknow	unknow	unknow
TCGA-HT-8106	3	0	53	MALE	G3	unknow	unknow	unknow	unknow
TCGA-DU-A76L	814	1	54	MALE	G3	unknow	unknow	unknow	unknow
TCGA-HT-7611	1752	0	36	MALE	G2	unknow	unknow	unknow	unknow
TCGA-FG-A60J	449	0	47	FEMALE	G2	unknow	unknow	unknow	unknow
TCGA-FG-A60L	655	0	34	FEMALE	G2	unknow	unknow	unknow	unknow
TCGA-DU-A6S2	777	0	37	FEMALE	G2	unknow	unknow	unknow	unknow
TCGA-DB-A4XH	962	0	53	FEMALE	G2	unknow	unknow	unknow	unknow
TCGA-S9-A6WI	2585	0	56	FEMALE	G2	unknow	unknow	unknow	unknow
TCGA-FG-A6J3	677	0	52	FEMALE	G3	unknow	unknow	unknow	unknow
TCGA-FG-8189	685	0	33	FEMALE	G2	unknow	unknow	unknow	unknow
TCGA-DB-A4XB	919	0	38	MALE	G3	unknow	unknow	unknow	unknow
TCGA-DU-8166	516	0	29	FEMALE	G2	unknow	unknow	unknow	unknow
TCGA-FG-A60K	542	0	34	FEMALE	G2	unknow	unknow	unknow	unknow
TCGA-FG-8185	433	0	37	MALE	G3	unknow	unknow	unknow	unknow
TCGA-S9-A7QY	863	0	35	FEMALE	G2	unknow	unknow	unknow	unknow
TCGA-DB-A64L	736	0	67	FEMALE	G2	unknow	unknow	unknow	unknow
TCGA-DU-8164	651	0	51	MALE	G2	unknow	unknow	unknow	unknow
TCGA-VM-A8CA	411	0	54	MALE	G2	unknow	unknow	unknow	unknow
TCGA-HT-7609	1399	0	34	MALE	G3	unknow	unknow	unknow	unknow
TCGA-DU-8158	155	1	57	FEMALE	G3	unknow	unknow	unknow	unknow
TCGA-HT-7881	1079	0	38	MALE	G2	unknow	unknow	unknow	unknow
TCGA-VW-A8FI	245	1	66	MALE	G3	unknow	unknow	unknow	unknow
TCGA-VM-A8C8	1397	0	50	FEMALE	G2	unknow	unknow	unknow	unknow
TCGA-RY-A847	933	0	45	MALE	G2	unknow	unknow	unknow	unknow
TCGA-QH-A86X	337	0	33	MALE	G2	unknow	unknow	unknow	unknow
TCGA-TM-A84M	754	0	40	MALE	G3	unknow	unknow	unknow	unknow
TCGA-DU-7010	456	1	58	FEMALE	G3	unknow	unknow	unknow	unknow
TCGA-DU-5849	443	0	48	MALE	G2	unknow	unknow	unknow	unknow
TCGA-VM-A8CB	3	0	33	MALE	G3	unknow	unknow	unknow	unknow
TCGA-DU-5853	407	0	29	MALE	G2	unknow	unknow	unknow	unknow
TCGA-DU-A5TY	1033	1	46	FEMALE	G3	unknow	unknow	unknow	unknow
TCGA-TM-A84O	1011	1	61	FEMALE	G3	unknow	unknow	unknow	unknow
TCGA-RY-A83Z	301	0	54	FEMALE	G3	unknow	unknow	unknow	unknow
TCGA-HT-8564	478	0	47	MALE	G3	unknow	unknow	unknow	unknow
TCGA-FG-8186	487	0	42	FEMALE	G3	unknow	unknow	unknow	unknow
TCGA-DU-8168	431	0	55	FEMALE	G3	unknow	unknow	unknow	unknow
TCGA-DB-5278	2772	0	17	MALE	G2	unknow	unknow	unknow	unknow
TCGA-S9-A6U6	1069	0	28	MALE	G3	unknow	unknow	unknow	unknow
TCGA-DU-7018	933	1	57	FEMALE	G3	unknow	unknow	unknow	unknow
TCGA-IK-7675	578	1	43	MALE	G2	unknow	unknow	unknow	unknow
TCGA-HT-7680	23	0	32	FEMALE	G2	unknow	unknow	unknow	unknow
TCGA-P5-A5EX	243	0	41	FEMALE	G3	unknow	unknow	unknow	unknow
TCGA-TM-A84S	454	0	36	MALE	G3	unknow	unknow	unknow	unknow
TCGA-DB-5281	2381	0	61	MALE	G3	unknow	unknow	unknow	unknow
TCGA-HT-7875	10	0	56	MALE	G2	unknow	unknow	unknow	unknow
TCGA-S9-A6TW	1250	0	40	MALE	G3	unknow	unknow	unknow	unknow
TCGA-E1-A7YY	4445	1	27	FEMALE	G2	unknow	unknow	unknow	unknow
TCGA-FG-8188	455	0	41	MALE	G2	unknow	unknow	unknow	unknow
TCGA-TM-A84T	724	0	19	MALE	G2	unknow	unknow	unknow	unknow
TCGA-DB-A75P	492	0	25	FEMALE	G2	unknow	unknow	unknow	unknow
TCGA-DU-7013	269	1	59	MALE	G3	unknow	unknow	unknow	unknow
TCGA-HT-7477	738	0	62	MALE	G3	unknow	unknow	unknow	unknow
TCGA-P5-A735	292	0	38	FEMALE	G2	unknow	unknow	unknow	unknow
TCGA-RY-A843	63	0	30	MALE	G3	unknow	unknow	unknow	unknow
TCGA-DB-5280	1112	0	43	MALE	G2	unknow	unknow	unknow	unknow
TCGA-E1-A7YS	466	1	71	MALE	G3	unknow	unknow	unknow	unknow
TCGA-EZ-7264	1201	0	47	FEMALE	G2	unknow	unknow	unknow	unknow
TCGA-E1-A7YJ	592	1	55	MALE	G3	unknow	unknow	unknow	unknow
TCGA-DB-A4XG	2219	0	34	MALE	G3	unknow	unknow	unknow	unknow
TCGA-S9-A6U5	992	0	33	MALE	G2	unknow	unknow	unknow	unknow
TCGA-DU-6396	2286	1	31	FEMALE	G3	unknow	unknow	unknow	unknow
TCGA-DB-A64V	889	0	54	MALE	G2	unknow	unknow	unknow	unknow
TCGA-P5-A72W	317	0	35	MALE	G3	unknow	unknow	unknow	unknow
TCGA-FG-6688	571	0	59	FEMALE	G3	unknow	unknow	unknow	unknow
TCGA-HT-A74K	467	0	58	FEMALE	G3	unknow	unknow	unknow	unknow
TCGA-RY-A840	854	0	47	MALE	G3	unknow	unknow	unknow	unknow
TCGA-S9-A6U8	2988	1	24	MALE	G2	unknow	unknow	unknow	unknow
TCGA-HT-A5RB	3	0	24	MALE	G2	unknow	unknow	unknow	unknow
TCGA-FG-A4MT	1164	0	27	FEMALE	G2	unknow	unknow	unknow	unknow
TCGA-P5-A5ET	0	0	27	MALE	G2	unknow	unknow	unknow	unknow
TCGA-DU-A5TW	760	0	33	FEMALE	G3	unknow	unknow	unknow	unknow
TCGA-S9-A6WL	946	0	52	MALE	G3	unknow	unknow	unknow	unknow
TCGA-DU-5854	257	0	57	FEMALE	G3	unknow	unknow	unknow	unknow
TCGA-DU-6542	73	0	25	MALE	G3	unknow	unknow	unknow	unknow
TCGA-DB-A4XF	1021	0	41	FEMALE	G3	unknow	unknow	unknow	unknow
TCGA-DU-7292	242	1	69	MALE	G3	unknow	unknow	unknow	unknow
TCGA-FG-6692	561	1	63	MALE	G3	unknow	unknow	unknow	unknow
TCGA-E1-5305	2433	1	34	MALE	G3	unknow	unknow	unknow	unknow
TCGA-VM-A8CD	240	1	58	MALE	G3	unknow	unknow	unknow	unknow
TCGA-CS-5397	194	1	54	FEMALE	G3	unknow	unknow	unknow	unknow
TCGA-DU-6397	1401	1	45	MALE	G3	unknow	unknow	unknow	unknow
TCGA-E1-5303	2052	1	38	MALE	G3	unknow	unknow	unknow	unknow
TCGA-HT-7610	1706	0	25	FEMALE	G2	unknow	unknow	unknow	unknow
TCGA-S9-A6U1	785	0	22	FEMALE	G3	unknow	unknow	unknow	unknow
TCGA-HT-7483	5255	0	14	MALE	G2	unknow	unknow	unknow	unknow
TCGA-S9-A6TY	1076	0	50	MALE	G2	unknow	unknow	unknow	unknow
TCGA-DU-6399	2000	1	54	MALE	G2	unknow	unknow	unknow	unknow
TCGA-E1-A7YW	1120	1	28	MALE	G2	unknow	unknow	unknow	unknow
TCGA-HT-7608	671	0	61	MALE	G2	unknow	unknow	unknow	unknow
TCGA-S9-A7R1	5166	1	35	MALE	G2	unknow	unknow	unknow	unknow
TCGA-WY-A85A	1320	0	20	MALE	G2	unknow	unknow	unknow	unknow
TCGA-TQ-A7RH	486	0	39	MALE	G2	unknow	unknow	unknow	unknow
TCGA-DH-5140	607	1	38	FEMALE	G3	unknow	unknow	unknow	unknow
TCGA-DU-6403	354	1	60	FEMALE	G3	unknow	unknow	unknow	unknow
TCGA-FG-A4MW	559	1	63	MALE	G3	unknow	unknow	unknow	unknow
TCGA-CS-4944	1828	0	50	MALE	G2	unknow	unknow	unknow	unknow
TCGA-HW-A5KL	878	0	42	FEMALE	G2	unknow	unknow	unknow	unknow
TCGA-FN-7833	837	0	25	MALE	G3	unknow	unknow	unknow	unknow
TCGA-HT-7479	1227	0	44	MALE	G3	unknow	unknow	unknow	unknow
TCGA-P5-A72X	403	0	21	MALE	G3	unknow	unknow	unknow	unknow
TCGA-HT-A74L	336	0	22	FEMALE	G2	unknow	unknow	unknow	unknow
TCGA-DU-8161	722	1	63	FEMALE	G3	unknow	unknow	unknow	unknow
TCGA-QH-A6XA	502	0	23	FEMALE	G2	unknow	unknow	unknow	unknow
TCGA-HT-7468	203	0	30	MALE	G3	unknow	unknow	unknow	unknow
TCGA-CS-4941	234	1	67	MALE	G3	unknow	unknow	unknow	unknow
TCGA-E1-5318	2379	1	42	FEMALE	G2	unknow	unknow	unknow	unknow
TCGA-S9-A7IQ	1099	0	45	FEMALE	G2	unknow	unknow	unknow	unknow
TCGA-S9-A89V	569	0	70	MALE	G3	unknow	unknow	unknow	unknow
TCGA-DU-6400	37	1	66	FEMALE	G2	unknow	unknow	unknow	unknow
TCGA-E1-A7YE	886	1	32	FEMALE	G3	unknow	unknow	unknow	unknow
TCGA-FG-A710	1115	0	50	FEMALE	G2	unknow	unknow	unknow	unknow
TCGA-HT-8563	860	0	30	FEMALE	G3	unknow	unknow	unknow	unknow
TCGA-DH-A66F	523	0	49	MALE	G2	unknow	unknow	unknow	unknow
TCGA-TQ-A7RU	1032	0	51	MALE	G2	unknow	unknow	unknow	unknow
TCGA-HT-7616	7	1	75	MALE	G3	unknow	unknow	unknow	unknow
TCGA-FG-8187	611	0	31	MALE	G2	unknow	unknow	unknow	unknow
TCGA-HT-8113	900	0	49	FEMALE	G2	unknow	unknow	unknow	unknow
TCGA-TM-A84Q	772	0	31	MALE	G2	unknow	unknow	unknow	unknow
TCGA-DU-7304	709	1	43	MALE	G3	unknow	unknow	unknow	unknow
TCGA-HT-A74J	320	0	33	MALE	G2	unknow	unknow	unknow	unknow
TCGA-DU-7306	1277	0	67	MALE	G2	unknow	unknow	unknow	unknow
TCGA-HT-7677	494	0	53	MALE	G3	unknow	unknow	unknow	unknow
TCGA-HT-7470	1220	1	37	MALE	G3	unknow	unknow	unknow	unknow
TCGA-DB-5275	1458	0	36	MALE	G3	unknow	unknow	unknow	unknow
TCGA-E1-A7YK	378	1	52	MALE	G3	unknow	unknow	unknow	unknow
TCGA-HT-7880	162	0	30	MALE	G2	unknow	unknow	unknow	unknow
TCGA-FG-7643	611	0	49	FEMALE	G2	unknow	unknow	unknow	unknow
TCGA-FG-7638	686	0	31	FEMALE	G3	unknow	unknow	unknow	unknow
TCGA-HT-7620	434	0	40	MALE	G3	unknow	unknow	unknow	unknow
TCGA-HT-A61A	194	0	20	FEMALE	G2	unknow	unknow	unknow	unknow
TCGA-DU-6393	1585	1	66	MALE	G3	unknow	unknow	unknow	unknow
TCGA-HT-8109	169	0	64	MALE	G3	unknow	unknow	unknow	unknow
TCGA-P5-A781	134	0	34	FEMALE	G3	unknow	unknow	unknow	unknow
TCGA-HT-7603	705	0	29	MALE	G2	unknow	unknow	unknow	unknow
TCGA-HT-A617	491	0	47	MALE	G2	unknow	unknow	unknow	unknow
TCGA-IK-8125	1301	0	62	MALE	G3	unknow	unknow	unknow	unknow
TCGA-DB-A4X9	1412	0	33	FEMALE	G2	unknow	unknow	unknow	unknow
TCGA-CS-6665	1568	0	51	FEMALE	G3	unknow	unknow	unknow	unknow
TCGA-HT-A616	55	0	36	FEMALE	G2	unknow	unknow	unknow	unknow
TCGA-DU-A7TD	228	1	52	MALE	G3	unknow	unknow	unknow	unknow
TCGA-FG-5962	1453	0	54	MALE	G3	unknow	unknow	unknow	unknow
TCGA-DU-A7TC	1137	0	32	MALE	G2	unknow	unknow	unknow	unknow
TCGA-HT-A618	512	0	37	FEMALE	G3	unknow	unknow	unknow	unknow
TCGA-HW-7486	1721	0	37	MALE	G2	unknow	unknow	unknow	unknow
TCGA-HT-7686	1300	0	29	FEMALE	G3	unknow	unknow	unknow	unknow
TCGA-CS-5390		0	47	FEMALE	G2	unknow	unknow	unknow	unknow
TCGA-HW-A5KM	630	0	35	MALE	G2	unknow	unknow	unknow	unknow
TCGA-QH-A65S	77	0	32	FEMALE	G2	unknow	unknow	unknow	unknow
TCGA-E1-A7YV	987	1	26	FEMALE	G3	unknow	unknow	unknow	unknow
TCGA-HT-7475	530	0	67	MALE	G3	unknow	unknow	unknow	unknow
TCGA-HT-7467	3	0	54	MALE	G2	unknow	unknow	unknow	unknow
TCGA-TM-A84I	854	0	30	MALE	G3	unknow	unknow	unknow	unknow
TCGA-FG-8182	416	0	35	MALE	G2	unknow	unknow	unknow	unknow
TCGA-TM-A7C5	1500	0	30	MALE	G2	unknow	unknow	unknow	unknow
TCGA-S9-A6WQ	428	0	57	FEMALE	G2	unknow	unknow	unknow	unknow
TCGA-DU-5872	532	0	43	FEMALE	G2	unknow	unknow	unknow	unknow
TCGA-E1-5311	4084	1	31	MALE	G3	unknow	unknow	unknow	unknow
TCGA-DU-A76O	522	0	30	MALE	G2	unknow	unknow	unknow	unknow
TCGA-HT-8107	14	0	62	MALE	G2	unknow	unknow	unknow	unknow
TCGA-FG-8181	862	0	23	MALE	G3	unknow	unknow	unknow	unknow
TCGA-VM-A8CH	714	0	24	FEMALE	G2	unknow	unknow	unknow	unknow
TCGA-FG-7636	544	0	48	MALE	G3	unknow	unknow	unknow	unknow
TCGA-QH-A6X3	313	0	27	MALE	G2	unknow	unknow	unknow	unknow
TCGA-CS-5395	639	1	43	MALE	G2	unknow	unknow	unknow	unknow
TCGA-DB-5276	2218	0	32	MALE	G3	unknow	unknow	unknow	unknow
TCGA-E1-A7YU	23	1	42	MALE	G3	unknow	unknow	unknow	unknow
TCGA-DU-5871	576	0	37	FEMALE	G2	unknow	unknow	unknow	unknow
TCGA-E1-A7Z6	984	1	41	FEMALE	G2	unknow	unknow	unknow	unknow
TCGA-DU-6401	2660	1	31	FEMALE	G2	unknow	unknow	unknow	unknow
TCGA-DH-5144	748	0	56	FEMALE	G3	unknow	unknow	unknow	unknow
TCGA-WY-A858	1337	0	32	FEMALE	G3	unknow	unknow	unknow	unknow
TCGA-DB-A64U	846	0	38	FEMALE	G2	unknow	unknow	unknow	unknow
TCGA-FG-8191	992	0	30	MALE	G3	unknow	unknow	unknow	unknow
TCGA-TQ-A7RK	1341	0	29	MALE	G2	unknow	unknow	unknow	unknow
TCGA-HT-7472	1	0	38	MALE	G2	unknow	unknow	unknow	unknow
TCGA-DB-5277	1547	1	34	MALE	G3	unknow	unknow	unknow	unknow
TCGA-VV-A829	1127	0	44	MALE	G3	unknow	unknow	unknow	unknow
TCGA-DH-A7UV	566	0	49	MALE	G3	unknow	unknow	unknow	unknow
TCGA-HW-8319	1209	1	34	FEMALE	G3	unknow	unknow	unknow	unknow
TCGA-WY-A85C	1426	0	36	MALE	G2	unknow	unknow	unknow	unknow
TCGA-P5-A5EW	204	0	20	FEMALE	G2	unknow	unknow	unknow	unknow
TCGA-DB-A75O	935	0	29	MALE	G3	unknow	unknow	unknow	unknow
TCGA-DU-A7TA	2565	0	32	MALE	G2	unknow	unknow	unknow	unknow
TCGA-E1-A7Z4	4412	1	35	MALE	G2	unknow	unknow	unknow	unknow
TCGA-S9-A6TV	571	0	50	MALE	G3	unknow	unknow	unknow	unknow
TCGA-HW-7495	1078	0	45	FEMALE	G2	unknow	unknow	unknow	unknow
TCGA-HT-7481	2918	0	39	MALE	G2	unknow	unknow	unknow	unknow
TCGA-E1-A7YQ	1578	1	58	FEMALE	G3	unknow	unknow	unknow	unknow
TCGA-DB-A64P	916	0	40	MALE	G3	unknow	unknow	unknow	unknow
TCGA-HT-7684	184	0	58	MALE	G3	unknow	unknow	unknow	unknow
TCGA-TQ-A7RR	787	0	38	MALE	G2	unknow	unknow	unknow	unknow
TCGA-HT-7691	3	0	31	FEMALE	G2	unknow	unknow	unknow	unknow
TCGA-HT-A5R7	615	0	33	FEMALE	G3	unknow	unknow	unknow	unknow
TCGA-HT-8104	372	0	51	FEMALE	G3	unknow	unknow	unknow	unknow
TCGA-DB-A64O	775	1	59	MALE	G2	unknow	unknow	unknow	unknow
TCGA-S9-A7IY	715	0	39	MALE	G3	unknow	unknow	unknow	unknow
TCGA-HT-A615	515	0	38	FEMALE	G2	unknow	unknow	unknow	unknow
TCGA-TM-A7C4	1470	0	39	FEMALE	G2	unknow	unknow	unknow	unknow
TCGA-DU-A7TG	1351	1	40	MALE	G2	unknow	unknow	unknow	unknow
TCGA-E1-5307	1762	1	62	FEMALE	G3	unknow	unknow	unknow	unknow
TCGA-P5-A731	274	0	59	FEMALE	G2	unknow	unknow	unknow	unknow
TCGA-HT-7693	533	0	51	FEMALE	G2	unknow	unknow	unknow	unknow
TCGA-HW-7491	2078	0	35	MALE	G2	unknow	unknow	unknow	unknow
TCGA-F6-A8O4	6	0	44	MALE	G2	unknow	unknow	unknow	unknow
TCGA-E1-A7Z2	398	1	58	FEMALE	G2	unknow	unknow	unknow	unknow
TCGA-DB-A64R	955	0	24	FEMALE	G2	unknow	unknow	unknow	unknow
TCGA-S9-A6U2	908	0	48	FEMALE	G2	unknow	unknow	unknow	unknow
TCGA-FG-A4MY	721	0	44	FEMALE	G2	unknow	unknow	unknow	unknow
TCGA-DB-A64Q	182	0	31	FEMALE	G2	unknow	unknow	unknow	unknow
TCGA-HW-A5KJ	962	1	68	MALE	G3	unknow	unknow	unknow	unknow
TCGA-S9-A89Z	623	0	40	MALE	G3	unknow	unknow	unknow	unknow
TCGA-DU-A5TR	908	0	51	MALE	G2	unknow	unknow	unknow	unknow
TCGA-DU-7298	576	1	38	FEMALE	G3	unknow	unknow	unknow	unknow
TCGA-HT-8018	1152	1	40	FEMALE	G2	unknow	unknow	unknow	unknow
TCGA-S9-A6WD	2289	0	58	MALE	G3	unknow	unknow	unknow	unknow
TCGA-HW-7490	1387	0	41	MALE	G2	unknow	unknow	unknow	unknow
TCGA-TM-A84R	566	0	46	MALE	G2	unknow	unknow	unknow	unknow
TCGA-HT-7694	210	0	60	MALE	G3	unknow	unknow	unknow	unknow
TCGA-HT-7856	1189	0	35	MALE	G3	unknow	unknow	unknow	unknow
TCGA-HT-A74H	74	0	62	MALE	G3	unknow	unknow	unknow	unknow
TCGA-S9-A7R7	3000	0	27	MALE	G2	unknow	unknow	unknow	unknow
TCGA-DU-7302	1834	0	48	FEMALE	G3	unknow	unknow	unknow	unknow
TCGA-HT-8013	1933	1	37	FEMALE	G2	unknow	unknow	unknow	unknow
TCGA-E1-A7YD	435	1	57	MALE	G3	unknow	unknow	unknow	unknow
TCGA-TM-A7CF	1989	0	41	FEMALE	G2	unknow	unknow	unknow	unknow
TCGA-TM-A7CA	1058	0	44	MALE	G2	unknow	unknow	unknow	unknow
TCGA-DU-7301	788	1	53	MALE	G2	unknow	unknow	unknow	unknow
TCGA-RY-A845	596	0	40	FEMALE	G2	unknow	unknow	unknow	unknow
TCGA-DB-A75L	342	0	36	FEMALE	G3	unknow	unknow	unknow	unknow
TCGA-DU-A5TP	1012	0	33	MALE	G3	unknow	unknow	unknow	unknow
TCGA-TM-A84L	1242	1	31	MALE	G2	unknow	unknow	unknow	unknow
TCGA-DH-5143	1401	0	30	MALE	G3	unknow	unknow	unknow	unknow
TCGA-DU-7006	349	1	60	FEMALE	G3	unknow	unknow	unknow	unknow
TCGA-DU-A5TT	743	0	70	MALE	G3	unknow	unknow	unknow	unknow
TCGA-TQ-A7RV	1868	0	27	MALE	G2	unknow	unknow	unknow	unknow
TCGA-HT-7855	585	0	39	MALE	G3	unknow	unknow	unknow	unknow
TCGA-HW-7489	1262	1	38	MALE	G2	unknow	unknow	unknow	unknow
TCGA-HT-7860	15	0	60	FEMALE	G3	unknow	unknow	unknow	unknow
TCGA-P5-A780	72	0	44	FEMALE	G3	unknow	unknow	unknow	unknow
TCGA-FG-5964	1588	0	62	MALE	G2	unknow	unknow	unknow	unknow
TCGA-HT-7601	153	0	30	FEMALE	G3	unknow	unknow	unknow	unknow
TCGA-HT-7473	503	0	28	MALE	G2	unknow	unknow	unknow	unknow
TCGA-CS-5393	1222	0	39	MALE	G3	unknow	unknow	unknow	unknow
TCGA-QH-A6XC	508	0	48	MALE	G3	unknow	unknow	unknow	unknow
TCGA-VV-A86M	487	0	36	FEMALE	G3	unknow	unknow	unknow	unknow
TCGA-S9-A7IS	241	1	33	FEMALE	G3	unknow	unknow	unknow	unknow
TCGA-HT-7695	442	0	29	FEMALE	G2	unknow	unknow	unknow	unknow
TCGA-HT-8110	419	0	57	MALE	G3	unknow	unknow	unknow	unknow
TCGA-E1-5319	2907	1	48	FEMALE	G2	unknow	unknow	unknow	unknow
TCGA-HT-7854	1201	0	62	MALE	G2	unknow	unknow	unknow	unknow
TCGA-VM-A8C9	1314	0	37	FEMALE	G2	unknow	unknow	unknow	unknow
TCGA-HT-7692	90	0	43	MALE	G2	unknow	unknow	unknow	unknow
TCGA-P5-A5EU	0	0	35	MALE	G3	unknow	unknow	unknow	unknow
TCGA-DU-8167	471	0	69	FEMALE	G2	unknow	unknow	unknow	unknow
TCGA-S9-A6WM	604	0	59	FEMALE	G3	unknow	unknow	unknow	unknow
TCGA-DU-7014	3571	1	59	MALE	G2	unknow	unknow	unknow	unknow
TCGA-R8-A6ML	2860	0	52	MALE	G3	unknow	unknow	unknow	unknow
TCGA-DH-A7UR	1650	0	59	FEMALE	G3	unknow	unknow	unknow	unknow
TCGA-P5-A5F6	39	0	26	MALE	G2	unknow	unknow	unknow	unknow
TCGA-HT-A4DV	792	0	51	FEMALE	G3	unknow	unknow	unknow	unknow
TCGA-P5-A5F4	231	0	35	FEMALE	G3	unknow	unknow	unknow	unknow
TCGA-FG-7634	467	0	28	MALE	G2	unknow	unknow	unknow	unknow
TCGA-KT-A7W1	438	0	45	FEMALE	G3	unknow	unknow	unknow	unknow
TCGA-DU-6406	512	1	59	FEMALE	G3	unknow	unknow	unknow	unknow
TCGA-FG-5965	1120	1	39	FEMALE	G2	unknow	unknow	unknow	unknow
TCGA-HT-7690	3	0	29	MALE	G3	unknow	unknow	unknow	unknow
TCGA-TQ-A7RM	1116	0	41	FEMALE	G3	unknow	unknow	unknow	unknow
TCGA-DU-A76R	648	1	51	MALE	G3	unknow	unknow	unknow	unknow
TCGA-S9-A6WE	4113	0	34	MALE	G2	unknow	unknow	unknow	unknow
TCGA-QH-A6CS	588	0	41	MALE	G3	unknow	unknow	unknow	unknow
TCGA-P5-A5EY	72	0	21	MALE	G2	unknow	unknow	unknow	unknow
TCGA-DB-5279	1354	0	59	MALE	G2	unknow	unknow	unknow	unknow
TCGA-DB-5274	2289	0	37	FEMALE	G3	unknow	unknow	unknow	unknow
TCGA-DU-A5TU	796	0	62	FEMALE	G2	unknow	unknow	unknow	unknow
TCGA-E1-A7YI	111	1	33	FEMALE	G3	unknow	unknow	unknow	unknow
TCGA-DU-A7T6	547	1	73	FEMALE	G3	unknow	unknow	unknow	unknow
TCGA-HT-A5R9	2	0	48	FEMALE	G3	unknow	unknow	unknow	unknow
TCGA-DU-8162	444	1	61	FEMALE	G3	unknow	unknow	unknow	unknow
TCGA-S9-A7IX	819	1	57	MALE	G3	unknow	unknow	unknow	unknow
TCGA-DU-8163	629	0	29	MALE	G3	unknow	unknow	unknow	unknow
TCGA-DU-6392	6423	0	35	FEMALE	G3	unknow	unknow	unknow	unknow
TCGA-P5-A72Z	354	0	64	FEMALE	G3	unknow	unknow	unknow	unknow
TCGA-TQ-A7RS	-1	0	25	FEMALE	G2	unknow	unknow	unknow	unknow
TCGA-S9-A6UA	178	1	66	MALE	G3	unknow	unknow	unknow	unknow
TCGA-DB-5270	3733	0	38	FEMALE	G3	unknow	unknow	unknow	unknow
TCGA-DU-A7T8	4229	1	35	MALE	G3	unknow	unknow	unknow	unknow
TCGA-FG-6690	1294	0	70	MALE	G2	unknow	unknow	unknow	unknow
TCGA-HT-A5RA	832	0	65	FEMALE	G3	unknow	unknow	unknow	unknow
TCGA-HT-A61B	533	0	22	MALE	G3	unknow	unknow	unknow	unknow
TCGA-S9-A7IZ	608	0	48	FEMALE	G3	unknow	unknow	unknow	unknow
TCGA-P5-A77X	105	0	55	FEMALE	G2	unknow	unknow	unknow	unknow
TCGA-DB-5273	2493	0	33	MALE	G3	unknow	unknow	unknow	unknow
TCGA-RY-A83X	939	0	46	FEMALE	G2	unknow	unknow	unknow	unknow
TCGA-DU-6407	2875	1	35	FEMALE	G2	unknow	unknow	unknow	unknow
TCGA-HT-8010	50	0	64	FEMALE	G2	unknow	unknow	unknow	unknow
TCGA-S9-A6TX	1245	0	46	MALE	G3	unknow	unknow	unknow	unknow
TCGA-FG-5963	775	1	23	MALE	G3	unknow	unknow	unknow	unknow
TCGA-HT-7602	908	0	21	MALE	G2	unknow	unknow	unknow	unknow
TCGA-S9-A7J0	609	0	30	FEMALE	G3	unknow	unknow	unknow	unknow
TCGA-HT-7877	4	0	20	FEMALE	G2	unknow	unknow	unknow	unknow
TCGA-TQ-A7RJ	1229	0	25	FEMALE	G2	unknow	unknow	unknow	unknow
TCGA-DU-7299	1339	1	33	MALE	G3	unknow	unknow	unknow	unknow
TCGA-HT-8108	76	0	26	FEMALE	G2	unknow	unknow	unknow	unknow
TCGA-FG-A87Q	174	0	61	FEMALE	G3	unknow	unknow	unknow	unknow
TCGA-P5-A5EZ	70	0	39	MALE	G3	unknow	unknow	unknow	unknow
TCGA-DU-7309	84	0	41	FEMALE	G3	unknow	unknow	unknow	unknow
TCGA-DU-A6S6	2893	0	35	FEMALE	G2	unknow	unknow	unknow	unknow
TCGA-DH-5141	968	0	32	MALE	G3	unknow	unknow	unknow	unknow
TCGA-S9-A7R4	914	0	46	MALE	G3	unknow	unknow	unknow	unknow
TCGA-KT-A74X	438	0	26	MALE	G3	unknow	unknow	unknow	unknow
TCGA-HT-7681	1359	0	29	FEMALE	G2	unknow	unknow	unknow	unknow
TCGA-S9-A7R2	316	1	69	MALE	G3	unknow	unknow	unknow	unknow
TCGA-P5-A72U	7	0	71	FEMALE	G3	unknow	unknow	unknow	unknow
TCGA-QH-A6CW	414	0	43	MALE	G3	unknow	unknow	unknow	unknow
TCGA-W9-A837	1553	0	47	MALE	G2	unknow	unknow	unknow	unknow
TCGA-HT-8015	3	0	21	MALE	G2	unknow	unknow	unknow	unknow
TCGA-DH-A669	919	1	70	MALE	G3	unknow	unknow	unknow	unknow
TCGA-HT-A614	82	0	47	MALE	G2	unknow	unknow	unknow	unknow
TCGA-DU-6394	682	1	53	MALE	G3	unknow	unknow	unknow	unknow
TCGA-DU-7009	4695	1	32	FEMALE	G2	unknow	unknow	unknow	unknow
TCGA-P5-A736	230	0	44	FEMALE	G3	unknow	unknow	unknow	unknow
TCGA-S9-A6WH	1173	0	73	FEMALE	G2	unknow	unknow	unknow	unknow
TCGA-WH-A86K	405	0	65	MALE	G2	unknow	unknow	unknow	unknow
TCGA-S9-A6WG	2602	0	31	MALE	G3	unknow	unknow	unknow	unknow
TCGA-DU-5851	531	0	40	FEMALE	G3	unknow	unknow	unknow	unknow
TCGA-S9-A7R3	3013	0	28	FEMALE	G2	unknow	unknow	unknow	unknow
TCGA-DB-A4XA	573	0	30	MALE	G2	unknow	unknow	unknow	unknow
TCGA-R8-A6MO	993	0	53	FEMALE	G2	unknow	unknow	unknow	unknow
TCGA-E1-A7YN	727	1	63	FEMALE	G3	unknow	unknow	unknow	unknow
TCGA-CS-6667	1469	0	39	FEMALE	G2	unknow	unknow	unknow	unknow
TCGA-E1-A7YM	648	1	63	MALE	G3	unknow	unknow	unknow	unknow
TCGA-E1-A7YL	492	1	46	MALE	G3	unknow	unknow	unknow	unknow
TCGA-HT-7480	2287	0	33	MALE	G2	unknow	unknow	unknow	unknow
TCGA-CS-6670	1426	0	43	MALE	G3	unknow	unknow	unknow	unknow
TCGA-HT-A619	651	0	51	FEMALE	G3	unknow	unknow	unknow	unknow
TCGA-TQ-A8XE	954	1	42	FEMALE	G2	unknow	unknow	unknow	unknow
TCGA-P5-A737	372	0	47	MALE	G2	unknow	unknow	unknow	unknow
TCGA-DU-A7TB	1567	0	56	MALE	G2	unknow	unknow	unknow	unknow
TCGA-HT-A4DS	7	0	55	FEMALE	G3	unknow	unknow	unknow	unknow
TCGA-DU-7300	1886	1	53	FEMALE	G3	unknow	unknow	unknow	unknow
TCGA-DU-7008	4752	0	41	FEMALE	G2	unknow	unknow	unknow	unknow
TCGA-DH-A66D	846	0	43	FEMALE	G3	unknow	unknow	unknow	unknow
TCGA-QH-A65X	482	0	28	FEMALE	G3	unknow	unknow	unknow	unknow
TCGA-HW-8320	1217	0	36	MALE	G3	unknow	unknow	unknow	unknow
TCGA-S9-A7QZ	826	0	41	MALE	G2	unknow	unknow	unknow	unknow
TCGA-R8-A73M	1806	0	48	FEMALE	G2	unknow	unknow	unknow	unknow
TCGA-QH-A6CU	451	0	52	FEMALE	G3	unknow	unknow	unknow	unknow
TCGA-HT-8105	190	0	54	MALE	G3	unknow	unknow	unknow	unknow
TCGA-VM-A8CE	1191	0	25	MALE	G2	unknow	unknow	unknow	unknow
TCGA-S9-A6TU	2650	0	38	MALE	G2	unknow	unknow	unknow	unknow
TCGA-HT-7688	964	0	59	MALE	G3	unknow	unknow	unknow	unknow
TCGA-HT-8011	494	0	55	MALE	G3	unknow	unknow	unknow	unknow
TCGA-TM-A84H	926	0	44	FEMALE	G3	unknow	unknow	unknow	unknow
TCGA-DU-6405	605	1	51	FEMALE	G3	unknow	unknow	unknow	unknow
TCGA-CS-6186	538	1	58	MALE	G3	unknow	unknow	unknow	unknow
TCGA-FG-A87N	567	0	37	FEMALE	G3	unknow	unknow	unknow	unknow
TCGA-HT-7471	4	0	37	FEMALE	G3	unknow	unknow	unknow	unknow
TCGA-FG-A70Z	328	0	53	FEMALE	G3	unknow	unknow	unknow	unknow
TCGA-HW-8321	1294	0	31	MALE	G3	unknow	unknow	unknow	unknow
TCGA-P5-A5F1	179	0	30	MALE	G2	unknow	unknow	unknow	unknow
TCGA-P5-A5EV	7	0	39	MALE	G2	unknow	unknow	unknow	unknow
TCGA-TQ-A7RW	821	1	32	MALE	G2	unknow	unknow	unknow	unknow
TCGA-HT-8114	1040	0	36	MALE	G3	unknow	unknow	unknow	unknow
TCGA-HT-7478	194	0	36	MALE	G2	unknow	unknow	unknow	unknow
TCGA-DH-A7UT	531	1	30	MALE	G3	unknow	unknow	unknow	unknow
TCGA-HT-7604	3725	0	50	MALE	G2	unknow	unknow	unknow	unknow
TCGA-DU-5855	207	0	49	FEMALE	G3	unknow	unknow	unknow	unknow
TCGA-DH-A66B	1279	0	52	MALE	G3	unknow	unknow	unknow	unknow
TCGA-DU-5847	548	0	34	FEMALE	G3	unknow	unknow	unknow	unknow
TCGA-DB-A4XC	1421	0	26	MALE	G2	unknow	unknow	unknow	unknow
TCGA-DU-8165	582	0	60	FEMALE	G3	unknow	unknow	unknow	unknow
TCGA-QH-A6CX	372	1	66	MALE	G2	unknow	unknow	unknow	unknow
TCGA-S9-A7QX	564	0	36	FEMALE	G3	unknow	unknow	unknow	unknow
TCGA-HT-7874	1130	0	41	FEMALE	G3	unknow	unknow	unknow	unknow
TCGA-DH-A66G	523	0	49	FEMALE	G3	unknow	unknow	unknow	unknow
TCGA-HT-8111	7	0	32	MALE	G3	unknow	unknow	unknow	unknow
TCGA-DU-A6S3	656	0	60	MALE	G2	unknow	unknow	unknow	unknow
TCGA-DU-7290	315	1	45	FEMALE	G3	unknow	unknow	unknow	unknow
TCGA-HT-7469	351	1	30	MALE	G3	unknow	unknow	unknow	unknow
TCGA-QH-A6X5	497	0	58	FEMALE	G2	unknow	unknow	unknow	unknow
TCGA-DU-6404	4068	1	24	FEMALE	G3	unknow	unknow	unknow	unknow
TCGA-CS-6188	814	1	48	MALE	G3	unknow	unknow	unknow	unknow
TCGA-HT-7485	122	0	42	MALE	G2	unknow	unknow	unknow	unknow
TCGA-QH-A870	395	0	38	FEMALE	G3	unknow	unknow	unknow	unknow
TCGA-HT-A61C	537	1	66	MALE	G3	unknow	unknow	unknow	unknow
TCGA-P5-A5F2	242	0	36	FEMALE	G2	unknow	unknow	unknow	unknow
TCGA-CS-5396	1631	0	53	FEMALE	G3	unknow	unknow	unknow	unknow
TCGA-DU-6395	1491	1	31	MALE	G2	unknow	unknow	unknow	unknow
TCGA-TM-A84J	735	0	63	MALE	G3	unknow	unknow	unknow	unknow
TCGA-HT-7687	3	0	74	MALE	G3	unknow	unknow	unknow	unknow
TCGA-S9-A6U9	2918	0	36	MALE	G3	unknow	unknow	unknow	unknow
TCGA-S9-A6WO	566	0	29	MALE	G2	unknow	unknow	unknow	unknow
TCGA-CS-6668	1519	0	57	FEMALE	G2	unknow	unknow	unknow	unknow
TCGA-HW-A5KK	388	1	64	MALE	G3	unknow	unknow	unknow	unknow
TCGA-WY-A859	1213	0	34	FEMALE	G2	unknow	unknow	unknow	unknow
TCGA-DH-A7UU	417	0	43	MALE	G3	unknow	unknow	unknow	unknow
TCGA-S9-A7QW	458	0	54	FEMALE	G3	unknow	unknow	unknow	unknow
TCGA-QH-A65V	384	0	43	FEMALE	G2	unknow	unknow	unknow	unknow
TCGA-WY-A85E	633	0	48	FEMALE	G2	unknow	unknow	unknow	unknow
TCGA-DU-7012	199	1	74	FEMALE	G3	unknow	unknow	unknow	unknow
TCGA-CS-6669	1494	0	26	FEMALE	G2	unknow	unknow	unknow	unknow
TCGA-TQ-A7RI	62	0	37	FEMALE	G2	unknow	unknow	unknow	unknow
TCGA-HT-8012	286	0	30	FEMALE	G2	unknow	unknow	unknow	unknow
TCGA-F6-A8O3	7	0	34	MALE	G2	unknow	unknow	unknow	unknow
TCGA-TQ-A7RO	949	0	29	MALE	G2	unknow	unknow	unknow	unknow
TCGA-S9-A7J1	249	0	43	MALE	G2	unknow	unknow	unknow	unknow
TCGA-TM-A84B	758	1	40	MALE	G3	unknow	unknow	unknow	unknow
TCGA-DB-A64X	563	0	56	FEMALE	G3	unknow	unknow	unknow	unknow
TCGA-FG-A713	622	0	74	FEMALE	G2	unknow	unknow	unknow	unknow
TCGA-E1-A7YH	2835	1	47	FEMALE	G3	unknow	unknow	unknow	unknow
TCGA-DB-A64S	835	0	20	MALE	G2	unknow	unknow	unknow	unknow
TCGA-DU-6408	3470	1	23	FEMALE	G3	unknow	unknow	unknow	unknow
TCGA-QH-A6X4	442	0	47	MALE	G3	unknow	unknow	unknow	unknow
TCGA-DU-7019	800	0	39	MALE	unknow	unknow	unknow	unknow	unknow
TCGA-DU-A76K	347	1	87	MALE	G2	unknow	unknow	unknow	unknow
TCGA-R8-A6MK	2702	0	40	MALE	G2	unknow	unknow	unknow	unknow
TCGA-HT-7879	112	0	31	MALE	G3	unknow	unknow	unknow	unknow
TCGA-S9-A6WP	567	0	42	MALE	G3	unknow	unknow	unknow	unknow
TCGA-HT-8019	1004	0	34	FEMALE	G3	unknow	unknow	unknow	unknow
TCGA-QH-A6CY	408	0	38	MALE	G3	unknow	unknow	unknow	unknow
TCGA-VW-A7QS	706	0	35	FEMALE	G3	unknow	unknow	unknow	unknow
TCGA-HT-7605	139	0	38	MALE	G2	unknow	unknow	unknow	unknow
TCGA-S9-A6WN	805	0	38	FEMALE	G3	unknow	unknow	unknow	unknow
TCGA-CS-6290	1137	1	31	MALE	G3	unknow	unknow	unknow	unknow
TCGA-DB-A4XE	1139	0	27	FEMALE	G3	unknow	unknow	unknow	unknow
TCGA-TQ-A7RQ	795	0	38	FEMALE	G2	unknow	unknow	unknow	unknow
TCGA-HT-7606	526	0	30	FEMALE	G2	unknow	unknow	unknow	unknow
TCGA-HT-7882	113	1	66	MALE	G3	unknow	unknow	unknow	unknow
TCGA-DU-A6S8	678	0	74	FEMALE	G3	unknow	unknow	unknow	unknow
TCGA-CS-4942	1335	1	44	FEMALE	G3	unknow	unknow	unknow	unknow
TCGA-FG-A4MU	326	0	58	MALE	G3	unknow	unknow	unknow	unknow
TCGA-HT-7902	956	0	30	FEMALE	G2	unknow	unknow	unknow	unknow
TCGA-HT-A5RC	162	1	70	FEMALE	G3	unknow	unknow	unknow	unknow
TCGA-WY-A85B	1393	0	24	MALE	G2	unknow	unknow	unknow	unknow
TCGA-DU-6410	242	0	56	MALE	G3	unknow	unknow	unknow	unknow
TCGA-FG-A711	1481	1	33	FEMALE	G2	unknow	unknow	unknow	unknow
TCGA-E1-A7Z3	2235	1	31	FEMALE	G2	unknow	unknow	unknow	unknow
TCGA-DB-A75K	368	0	55	FEMALE	G3	unknow	unknow	unknow	unknow
TCGA-CS-4938	3574	0	31	FEMALE	G2	unknow	unknow	unknow	unknow
TCGA-DH-A7US	706	0	50	MALE	G2	unknow	unknow	unknow	unknow
TCGA-DU-A7TJ	17	0	55	MALE	G3	unknow	unknow	unknow	unknow
TCGA-P5-A733	414	0	52	FEMALE	G2	unknow	unknow	unknow	unknow
TCGA-RY-A83Y	166	0	45	MALE	G2	unknow	unknow	unknow	unknow
TCGA-DU-5874	461	0	62	FEMALE	G2	unknow	unknow	unknow	unknow
TCGA-HW-7487	1382	0	39	MALE	G2	unknow	unknow	unknow	unknow
TCGA-HW-8322	758	0	39	MALE	G2	unknow	unknow	unknow	unknow
TCGA-FG-A70Y	868	0	20	FEMALE	G2	unknow	unknow	unknow	unknow
TCGA-E1-A7YO	2282	1	45	MALE	G3	unknow	unknow	unknow	unknow
TCGA-E1-5302	1525	1	41	MALE	G3	unknow	unknow	unknow	unknow
TCGA-HT-7873	718	0	29	MALE	G2	unknow	unknow	unknow	unknow
TCGA-DU-5870	5546	0	34	FEMALE	G2	unknow	unknow	unknow	unknow
TCGA-HT-7858	1540	0	28	MALE	G2	unknow	unknow	unknow	unknow
TCGA-DU-5852	205	1	61	FEMALE	G3	unknow	unknow	unknow	unknow
TCGA-FG-7641	627	0	31	MALE	G2	unknow	unknow	unknow	unknow
TCGA-QH-A65Z	427	0	54	MALE	G2	unknow	unknow	unknow	unknow
TCGA-HW-7493	2107	0	40	FEMALE	G2	unknow	unknow	unknow	unknow
TCGA-TQ-A7RF	650	0	27	FEMALE	G3	unknow	unknow	unknow	unknow
TCGA-HT-7689	455	0	58	FEMALE	G2	unknow	unknow	unknow	unknow
TCGA-HT-7607	96	1	61	FEMALE	G2	unknow	unknow	unknow	unknow
TCGA-DU-7011	3200	1	25	MALE	G2	unknow	unknow	unknow	unknow
TCGA-FG-6691	1257	0	23	FEMALE	G2	unknow	unknow	unknow	unknow
TCGA-HT-7676	5	0	26	MALE	G2	unknow	unknow	unknow	unknow
TCGA-HT-A5R5	4	0	33	FEMALE	G2	unknow	unknow	unknow	unknow
TCGA-FG-A4MX	569	0	47	MALE	G2	unknow	unknow	unknow	unknow
TCGA-FG-6689	454	0	30	MALE	G2	unknow	unknow	unknow	unknow
TCGA-DU-6402	214	1	52	MALE	G3	unknow	unknow	unknow	unknow
TCGA-DU-A6S7	638	0	27	FEMALE	G3	unknow	unknow	unknow	unknow
TCGA-QH-A6X8	509	0	56	FEMALE	G3	unknow	unknow	unknow	unknow
TCGA-S9-A7R8	961	1	44	FEMALE	G3	unknow	unknow	unknow	unknow
