# Supplementary material for: A cuproptosis-based prognostic model for predicting survival in low-grade glioma
Source: Aging (Albany NY). 2024 May 9;16(10):8697–716. doi: 10.18632/aging.205834 (PMC11164498; doi:10.18632/aging.205834)
Supplement: Supplementary Table 3 [file aging-16-205834-s003.xlsx]

## Sheet: Sheet1
Supplementary Table 3. CGGA clinical data.
ONTOLOGY	ID	Description	GeneRatio	BgRatio	pvalue	p.adjust	qvalue	geneID	Count
BP	GO:0030198	extracellular matrix organization	43/406	301/18723	5.52e-23	1.13e-19	8.26e-20	COL5A2/HAPLN2/COL1A1/NDNF/AEBP1/LAMC1/CAV1/NPNT/CAV2/FBLN5/ANXA2/ADAMTS1/SERPINH1/COL1A2/POSTN/FMOD/COL3A1/SLC2A10/CCN1/LUM/CYP1B1/COL14A1/NID2/LOXL2/SULF1/COL4A2/TGFB2/HAS2/OLFML2B/MMP9/COL5A1/COL4A1/MFAP4/PDPN/RUNX1/PTX3/SFRP2/MMP14/IBSP/ECM2/COL8A2/LAMB1/ADAMTS15	43
BP	GO:0043062	extracellular structure organization	43/406	302/18723	6.32e-23	1.13e-19	8.26e-20	COL5A2/HAPLN2/COL1A1/NDNF/AEBP1/LAMC1/CAV1/NPNT/CAV2/FBLN5/ANXA2/ADAMTS1/SERPINH1/COL1A2/POSTN/FMOD/COL3A1/SLC2A10/CCN1/LUM/CYP1B1/COL14A1/NID2/LOXL2/SULF1/COL4A2/TGFB2/HAS2/OLFML2B/MMP9/COL5A1/COL4A1/MFAP4/PDPN/RUNX1/PTX3/SFRP2/MMP14/IBSP/ECM2/COL8A2/LAMB1/ADAMTS15	43
BP	GO:0045229	external encapsulating structure organization	43/406	304/18723	8.25e-23	1.13e-19	8.26e-20	COL5A2/HAPLN2/COL1A1/NDNF/AEBP1/LAMC1/CAV1/NPNT/CAV2/FBLN5/ANXA2/ADAMTS1/SERPINH1/COL1A2/POSTN/FMOD/COL3A1/SLC2A10/CCN1/LUM/CYP1B1/COL14A1/NID2/LOXL2/SULF1/COL4A2/TGFB2/HAS2/OLFML2B/MMP9/COL5A1/COL4A1/MFAP4/PDPN/RUNX1/PTX3/SFRP2/MMP14/IBSP/ECM2/COL8A2/LAMB1/ADAMTS15	43
BP	GO:0042060	wound healing	43/406	422/18723	2.74e-17	2.82e-14	2.06e-14	F2RL1/THBD/MYOF/F3/COL1A1/NDNF/CAV1/ANXA2/PLAUR/EGFR/SERPINA1/TIMP1/VEGFA/ITGA5/POSTN/FZD6/COL3A1/F13A1/TFPI/CCN1/S100A8/TNFRSF12A/FN1/SAA1/THBS1/ITGA2/TGFB2/CD109/SDC1/SERPINE1/PLSCR1/COL5A1/PLAT/PLAU/CLIC1/PDPN/ANXA1/PROS1/FLNA/SLC11A1/SERPING1/CD44/TNC	43
BP	GO:0045785	positive regulation of cell adhesion	43/406	437/18723	9.95e-17	8.18e-14	5.98e-14	NDNF/CAV1/NPNT/PTPRC/HLA-DPA1/IQGAP1/PLAUR/CCL2/VCAM1/HLA-DQB1/HLA-DOA/HLA-DQA2/ADAM19/VEGFA/HLA-DRA/CCN1/LIF/FN1/SAA1/CD74/ITGA2/CCL5/TGFB2/HAS2/NR4A3/CDK6/ANGPT1/HLA-DPB1/PDPN/ANXA1/RUNX1/SFRP2/HLA-DRB5/IGFBP2/FLNA/HLA-DRB1/IBSP/HLA-DQB2/ECM2/ICAM1/CD44/HLA-DQA1/ITGA3	43
BP	GO:0140014	mitotic nuclear division	33/406	287/18723	4.99e-15	3.42e-12	2.5e-12	KIF15/KIF11/MKI67/SMC4/UBE2C/CAV2/SGO2/CDCA8/MYBL2/KIF2C/AURKB/NEK2/KIFC1/NCAPG/NUF2/TACC3/NCAPH/BUB1B/BUB1/CCDC8/NDC80/PTTG1/AURKA/PRC1/NUSAP1/TPX2/FLNA/CDC20/KIF18B/TRIP13/CCNB1/KIF4A/CENPF	33
BP	GO:0002399	MHC class II protein complex assembly	10/406	16/18723	1.47e-13	7.55e-11	5.51e-11	HLA-DPA1/HLA-DQB1/HLA-DOA/HLA-DQA2/HLA-DRA/HLA-DPB1/HLA-DRB5/HLA-DRB1/HLA-DQB2/HLA-DQA1	10
BP	GO:0002503	peptide antigen assembly with MHC class II protein complex	10/406	16/18723	1.47e-13	7.55e-11	5.51e-11	HLA-DPA1/HLA-DQB1/HLA-DOA/HLA-DQA2/HLA-DRA/HLA-DPB1/HLA-DRB5/HLA-DRB1/HLA-DQB2/HLA-DQA1	10
BP	GO:0007059	chromosome segregation	34/406	346/18723	1.97e-13	9.02e-11	6.59e-11	ECT2/MKI67/SMC4/TOP2A/UBE2C/SGO2/CDCA8/FAM83D/KIF2C/OIP5/AURKB/HJURP/NEK2/GEM/KIFC1/NCAPG/NUF2/TACC3/NCAPH/BUB1B/BUB1/NDC80/PTTG1/PLSCR1/SKA3/PRC1/NUSAP1/CDC20/KIF18B/BIRC5/TRIP13/CCNB1/KIF4A/CENPF	34
BP	GO:0000070	mitotic sister chromatid segregation	24/406	168/18723	2.5e-13	1.03e-10	7.51e-11	SMC4/UBE2C/SGO2/CDCA8/KIF2C/AURKB/NEK2/KIFC1/NCAPG/NUF2/TACC3/NCAPH/BUB1B/BUB1/NDC80/PTTG1/PRC1/NUSAP1/CDC20/KIF18B/TRIP13/CCNB1/KIF4A/CENPF	24
BP	GO:0002501	peptide antigen assembly with MHC protein complex	10/406	18/18723	7.72e-13	2.68e-10	1.96e-10	HLA-DPA1/HLA-DQB1/HLA-DOA/HLA-DQA2/HLA-DRA/HLA-DPB1/HLA-DRB5/HLA-DRB1/HLA-DQB2/HLA-DQA1	10
BP	GO:0031589	cell-substrate adhesion	34/406	363/18723	7.82e-13	2.68e-10	1.96e-10	COL1A1/NDNF/LAMC1/NPNT/JAG1/FBLN5/ACTN1/IQGAP1/VCAM1/SPRY4/VEGFA/ITGA5/POSTN/COL3A1/ANGPT2/CCN1/NID2/FN1/THBS1/ITGA2/HAS2/CDK6/SERPINE1/ANGPT1/SIGLEC1/PLAU/PDPN/GBP1/MMP14/FLNA/ECM2/LAMB1/CD44/ITGA3	34
BP	GO:0002396	MHC protein complex assembly	10/406	19/18723	1.6e-12	5.05e-10	3.69e-10	HLA-DPA1/HLA-DQB1/HLA-DOA/HLA-DQA2/HLA-DRA/HLA-DPB1/HLA-DRB5/HLA-DRB1/HLA-DQB2/HLA-DQA1	10
BP	GO:0000280	nuclear division	37/406	439/18723	1.81e-12	5.32e-10	3.89e-10	KIF15/KIF11/MKI67/SMC4/TOP2A/UBE2C/CAV2/SGO2/CDCA8/MYBL2/KIF2C/AURKB/NEK2/KIFC1/RAD51AP1/NCAPG/NUF2/LIF/TACC3/NCAPH/BUB1B/BUB1/CCDC8/NDC80/PTTG1/AURKA/CCNB2/PRC1/NUSAP1/TPX2/FLNA/CDC20/KIF18B/TRIP13/CCNB1/KIF4A/CENPF	37
BP	GO:0000819	sister chromatid segregation	25/406	202/18723	2.14e-12	5.86e-10	4.28e-10	SMC4/TOP2A/UBE2C/SGO2/CDCA8/KIF2C/AURKB/NEK2/KIFC1/NCAPG/NUF2/TACC3/NCAPH/BUB1B/BUB1/NDC80/PTTG1/PRC1/NUSAP1/CDC20/KIF18B/TRIP13/CCNB1/KIF4A/CENPF	25
BP	GO:0030199	collagen fibril organization	15/406	61/18723	2.42e-12	6.23e-10	4.55e-10	COL5A2/COL1A1/AEBP1/ANXA2/SERPINH1/COL1A2/FMOD/COL3A1/LUM/CYP1B1/COL14A1/LOXL2/TGFB2/COL5A1/SFRP2	15
BP	GO:0098813	nuclear chromosome segregation	28/406	281/18723	2.04e-11	4.41e-09	3.22e-09	ECT2/SMC4/TOP2A/UBE2C/SGO2/CDCA8/FAM83D/KIF2C/AURKB/NEK2/GEM/KIFC1/NCAPG/NUF2/TACC3/NCAPH/BUB1B/BUB1/NDC80/PTTG1/PRC1/NUSAP1/CDC20/KIF18B/TRIP13/CCNB1/KIF4A/CENPF	28
BP	GO:0048285	organelle fission	37/406	488/18723	4.06e-11	8.35e-09	6.1e-09	KIF15/KIF11/MKI67/SMC4/TOP2A/UBE2C/CAV2/SGO2/CDCA8/MYBL2/KIF2C/AURKB/NEK2/KIFC1/RAD51AP1/NCAPG/NUF2/LIF/TACC3/NCAPH/BUB1B/BUB1/CCDC8/NDC80/PTTG1/AURKA/CCNB2/PRC1/NUSAP1/TPX2/FLNA/CDC20/KIF18B/TRIP13/CCNB1/KIF4A/CENPF	37
BP	GO:0050878	regulation of body fluid levels	32/406	379/18723	5.84e-11	1.09e-08	7.97e-09	F2RL1/THBD/F3/FA2H/CAV1/ANXA2/PLAUR/EGFR/SERPINA1/VEGFA/MET/FZD6/OAS2/COL3A1/F13A1/TFPI/FN1/SAA1/THBS1/ITGA2/HAS2/SERPINE1/PLSCR1/PLAT/PLAU/CLIC1/PDPN/SOCS2/PROS1/FLNA/AQP1/SERPING1	32
BP	GO:0007596	blood coagulation	24/406	217/18723	6.59e-11	1.18e-08	8.61e-09	F2RL1/THBD/F3/CAV1/ANXA2/PLAUR/SERPINA1/FZD6/COL3A1/F13A1/TFPI/FN1/SAA1/THBS1/ITGA2/SERPINE1/PLSCR1/PLAT/PLAU/CLIC1/PDPN/PROS1/FLNA/SERPING1	24
BP	GO:0002495	antigen processing and presentation of peptide antigen via MHC class II	11/406	34/18723	7.96e-11	1.36e-08	9.97e-09	HLA-DPA1/HLA-DQB1/HLA-DOA/HLA-DQA2/HLA-DRA/CD74/HLA-DPB1/HLA-DRB5/HLA-DRB1/HLA-DQB2/HLA-DQA1	11
BP	GO:0007599	hemostasis	24/406	222/18723	1.06e-10	1.68e-08	1.23e-08	F2RL1/THBD/F3/CAV1/ANXA2/PLAUR/SERPINA1/FZD6/COL3A1/F13A1/TFPI/FN1/SAA1/THBS1/ITGA2/SERPINE1/PLSCR1/PLAT/PLAU/CLIC1/PDPN/PROS1/FLNA/SERPING1	24
BP	GO:0050817	coagulation	24/406	222/18723	1.06e-10	1.68e-08	1.23e-08	F2RL1/THBD/F3/CAV1/ANXA2/PLAUR/SERPINA1/FZD6/COL3A1/F13A1/TFPI/FN1/SAA1/THBS1/ITGA2/SERPINE1/PLSCR1/PLAT/PLAU/CLIC1/PDPN/PROS1/FLNA/SERPING1	24
BP	GO:0016064	immunoglobulin mediated immune response	23/406	207/18723	1.51e-10	2.3e-08	1.68e-08	C3/CLCF1/PTPRC/HLA-DPA1/HLA-DQB1/HLA-DOA/IL13RA2/HLA-DQA2/HLA-DRA/CFI/C7/FOXJ1/C2/CD74/C1RL/C1R/HLA-DPB1/HLA-DRB5/HLA-DRB1/C1S/HLA-DQB2/SERPING1/HLA-DQA1	23
BP	GO:0019724	B cell mediated immunity	23/406	210/18723	2.02e-10	2.97e-08	2.17e-08	C3/CLCF1/PTPRC/HLA-DPA1/HLA-DQB1/HLA-DOA/IL13RA2/HLA-DQA2/HLA-DRA/CFI/C7/FOXJ1/C2/CD74/C1RL/C1R/HLA-DPB1/HLA-DRB5/HLA-DRB1/C1S/HLA-DQB2/SERPING1/HLA-DQA1	23
BP	GO:0002478	antigen processing and presentation of exogenous peptide antigen	11/406	38/18723	3.1e-10	4.39e-08	3.21e-08	HLA-DPA1/HLA-DQB1/HLA-DOA/HLA-DQA2/HLA-DRA/CD74/HLA-DPB1/HLA-DRB5/HLA-DRB1/HLA-DQB2/HLA-DQA1	11
BP	GO:0022409	positive regulation of cell-cell adhesion	26/406	284/18723	6.92e-10	9.48e-08	6.92e-08	CAV1/PTPRC/HLA-DPA1/PLAUR/CCL2/VCAM1/HLA-DQB1/HLA-DOA/HLA-DQA2/ADAM19/HLA-DRA/CD74/CCL5/HAS2/NR4A3/HLA-DPB1/PDPN/ANXA1/RUNX1/HLA-DRB5/IGFBP2/HLA-DRB1/HLA-DQB2/ICAM1/CD44/HLA-DQA1	26
BP	GO:0002449	lymphocyte mediated immunity	29/406	350/18723	7.42e-10	9.84e-08	7.19e-08	C3/CLCF1/PTPRC/JAG1/HLA-DPA1/HLA-DQB1/HLA-DOA/IL13RA2/HLA-DQA2/HLA-DRA/CFI/C7/AHR/CTSC/FOXJ1/RSAD2/C2/CD74/C1RL/C1R/HLA-DPB1/HLA-DRB5/HLA-DRB1/IL1R1/C1S/HLA-DQB2/SERPING1/ICAM1/HLA-DQA1	29
BP	GO:0019882	antigen processing and presentation	16/406	106/18723	1.11e-09	1.42e-07	1.04e-07	HLA-DPA1/HLA-DQB1/HLA-DOA/HLA-DQA2/HLA-DRA/CD74/THBS1/HLA-DPB1/RAB34/HLA-DRB5/HLA-DRB1/FGL2/HLA-DQB2/SLC11A1/ICAM1/HLA-DQA1	16
BP	GO:0001655	urogenital system development	28/406	338/18723	1.48e-09	1.84e-07	1.34e-07	NPNT/SERPINF1/JAG1/ADAMTS1/IQGAP1/FREM2/VEGFA/ANGPT2/LIF/FOXJ1/ACTA2/SULF1/TGFB2/HAS2/SDC1/MMP9/RDH10/ANGPT1/COL4A1/SPRY1/STAT1/ANXA1/CRLF1/EGR1/PDGFD/ITGA3/CENPF/TNC	28
BP	GO:0031099	regeneration	21/406	198/18723	2.26e-09	2.73e-07	1.99e-07	HAMP/PTGFRN/EGFR/SPP1/POSTN/CCNA2/ANGPT2/C5AR1/TYMS/NR4A3/AURKA/LGR6/ANXA1/RUNX1/CDK1/FLNA/NNMT/FOLR1/MAG/CCNB1/TNC	21
BP	GO:0072001	renal system development	26/406	302/18723	2.57e-09	2.97e-07	2.17e-07	NPNT/SERPINF1/JAG1/ADAMTS1/IQGAP1/FREM2/VEGFA/ANGPT2/LIF/FOXJ1/ACTA2/SULF1/TGFB2/HAS2/SDC1/MMP9/RDH10/ANGPT1/COL4A1/SPRY1/STAT1/CRLF1/EGR1/PDGFD/ITGA3/CENPF	26
BP	GO:1903039	positive regulation of leukocyte cell-cell adhesion	23/406	239/18723	2.6e-09	2.97e-07	2.17e-07	CAV1/PTPRC/HLA-DPA1/CCL2/VCAM1/HLA-DQB1/HLA-DOA/HLA-DQA2/HLA-DRA/CD74/CCL5/HAS2/NR4A3/HLA-DPB1/ANXA1/RUNX1/HLA-DRB5/IGFBP2/HLA-DRB1/HLA-DQB2/ICAM1/CD44/HLA-DQA1	23
BP	GO:0007159	leukocyte cell-cell adhesion	29/406	371/18723	2.84e-09	3.11e-07	2.27e-07	CAV1/PTPRC/HLA-DPA1/CCL2/VCAM1/HLA-DQB1/HLA-DOA/HLA-DQA2/HLA-DRA/S100A8/FOXJ1/CD74/IRF1/CCL5/HAS2/NR4A3/HLA-DPB1/S100A9/ANXA1/RUNX1/HLA-DRB5/IGFBP2/HLA-DRB1/FGL2/MSN/HLA-DQB2/ICAM1/CD44/HLA-DQA1	29
BP	GO:0001819	positive regulation of cytokine production	33/406	467/18723	2.87e-09	3.11e-07	2.27e-07	F2RL1/C3/CHI3L1/F3/PTPRC/HLA-DPA1/IL1RAP/MBP/POSTN/OAS2/LUM/CYP1B1/C5AR1/SAA1/RSAD2/SULF1/CD74/THBS1/TLR1/IRF1/NR4A3/SERPINE1/HLA-DPB1/OAS3/STAT1/ANXA1/RUNX1/CD58/EGR1/IL1R1/OAS1/SLC11A1/ISG15	33
BP	GO:0010810	regulation of cell-substrate adhesion	22/406	221/18723	3.09e-09	3.26e-07	2.38e-07	COL1A1/NDNF/NPNT/JAG1/IQGAP1/SPRY4/VEGFA/POSTN/ANGPT2/CCN1/FN1/THBS1/HAS2/CDK6/SERPINE1/PLAU/PDPN/GBP1/MMP14/FLNA/ECM2/ITGA3	22
BP	GO:1902850	microtubule cytoskeleton organization involved in mitosis	18/406	147/18723	3.25e-09	3.34e-07	2.44e-07	KIF15/KIF11/MYBL2/AURKB/NEK2/KIFC1/NUF2/TACC3/NDC80/AURKA/SPRY1/PRC1/NUSAP1/TPX2/FLNA/CDC20/CCNB1/KIF4A	18
BP	GO:0019884	antigen processing and presentation of exogenous antigen	11/406	47/18723	3.76e-09	3.77e-07	2.76e-07	HLA-DPA1/HLA-DQB1/HLA-DOA/HLA-DQA2/HLA-DRA/CD74/HLA-DPB1/HLA-DRB5/HLA-DRB1/HLA-DQB2/HLA-DQA1	11
BP	GO:0022407	regulation of cell-cell adhesion	32/406	448/18723	3.88e-09	3.8e-07	2.78e-07	CAV1/PTPRC/JAG1/HLA-DPA1/PLAUR/MBP/CCL2/VCAM1/HLA-DQB1/HLA-DOA/HLA-DQA2/ADAM19/VEGFA/HLA-DRA/FOXJ1/CD74/IRF1/CCL5/HAS2/NR4A3/HLA-DPB1/PDPN/ANXA1/RUNX1/HLA-DRB5/IGFBP2/HLA-DRB1/FGL2/HLA-DQB2/ICAM1/CD44/HLA-DQA1	32
BP	GO:0001822	kidney development	25/406	293/18723	6.28e-09	6.01e-07	4.39e-07	NPNT/SERPINF1/JAG1/ADAMTS1/IQGAP1/FREM2/VEGFA/ANGPT2/LIF/FOXJ1/ACTA2/SULF1/TGFB2/HAS2/SDC1/MMP9/RDH10/ANGPT1/SPRY1/STAT1/CRLF1/EGR1/PDGFD/ITGA3/CENPF	25
BP	GO:0007052	mitotic spindle organization	16/406	120/18723	7.07e-09	6.58e-07	4.81e-07	KIF15/KIF11/MYBL2/AURKB/NEK2/KIFC1/NUF2/TACC3/NDC80/AURKA/PRC1/TPX2/FLNA/CDC20/CCNB1/KIF4A	16
BP	GO:0010951	negative regulation of endopeptidase activity	23/406	252/18723	7.2e-09	6.58e-07	4.81e-07	C3/SERPINF1/IFI6/ANXA2/PLAUR/SERPINH1/SERPINA1/TIMP1/VEGFA/TFPI/LTF/THBS1/CD109/PTTG1/MMP9/SERPINE1/CRB2/SFRP2/PROS1/AQP1/BIRC5/SERPING1/CD44	23
BP	GO:0048002	antigen processing and presentation of peptide antigen	12/406	62/18723	7.47e-09	6.67e-07	4.87e-07	HLA-DPA1/HLA-DQB1/HLA-DOA/HLA-DQA2/HLA-DRA/CD74/HLA-DPB1/HLA-DRB5/HLA-DRB1/HLA-DQB2/SLC11A1/HLA-DQA1	12
BP	GO:0002443	leukocyte mediated immunity	31/406	440/18723	9.47e-09	8.28e-07	6.05e-07	F2RL1/C3/CLCF1/PTPRC/JAG1/HLA-DPA1/HLA-DQB1/HLA-DOA/IL13RA2/HLA-DQA2/HLA-DRA/CFI/C7/AHR/CTSC/FOXJ1/RSAD2/C2/CD74/C1RL/C1R/NR4A3/HLA-DPB1/HLA-DRB5/HLA-DRB1/IL1R1/C1S/HLA-DQB2/SERPING1/ICAM1/HLA-DQA1	31
BP	GO:0044772	mitotic cell cycle phase transition	30/406	424/18723	1.5e-08	1.26e-06	9.22e-07	WEE1/GTSE1/BCAT1/UBE2C/LATS2/ADAMTS1/CCL2/AURKB/EGFR/CDK2/CCNA2/TACC3/MELK/DTL/BUB1B/FOXM1/BUB1/CDK6/CDKN2C/NDC80/AURKA/CCNB2/CDKN3/ANXA1/IQGAP3/CDK1/USH1C/TRIP13/CCNB1/CENPF	30
BP	GO:0010466	negative regulation of peptidase activity	23/406	262/18723	1.51e-08	1.26e-06	9.22e-07	C3/SERPINF1/IFI6/ANXA2/PLAUR/SERPINH1/SERPINA1/TIMP1/VEGFA/TFPI/LTF/THBS1/CD109/PTTG1/MMP9/SERPINE1/CRB2/SFRP2/PROS1/AQP1/BIRC5/SERPING1/CD44	23
BP	GO:0014812	muscle cell migration	15/406	110/18723	1.54e-08	1.26e-06	9.22e-07	ADAMTS1/IQGAP1/S100A11/THBS4/IGFBP3/POSTN/ITGA2/CCL5/HAS2/NR4A3/SERPINE1/PLAT/PLAU/ANXA1/PDGFD	15
BP	GO:0030193	regulation of blood coagulation	12/406	66/18723	1.57e-08	1.27e-06	9.27e-07	F2RL1/THBD/F3/CAV1/ANXA2/TFPI/THBS1/SERPINE1/PLAT/PLAU/PROS1/SERPING1	12
BP	GO:0070371	ERK1 and ERK2 cascade	26/406	330/18723	1.63e-08	1.29e-06	9.4e-07	F2RL1/CHI3L1/NPNT/PTPRC/FAM83D/CCL2/EGFR/SPRY4/CCN1/LIF/C5AR1/FN1/PLA2G5/CD74/ATF3/CCL5/ANGPT1/SPRY1/IQGAP3/GBP1/CDK1/HLA-DRB1/PLA2G2A/ICAM1/PDGFD/CD44	26
BP	GO:0050792	regulation of viral process	18/406	164/18723	1.87e-08	1.45e-06	1.06e-06	CXCL8/TOP2A/CAV2/OAS2/MX1/LTF/APOBEC3C/RSAD2/CD74/CCL5/PLSCR1/OAS3/STAT1/PTX3/HLA-DRB1/CIITA/OAS1/ISG15	18
BP	GO:1900046	regulation of hemostasis	12/406	68/18723	2.24e-08	1.7e-06	1.24e-06	F2RL1/THBD/F3/CAV1/ANXA2/TFPI/THBS1/SERPINE1/PLAT/PLAU/PROS1/SERPING1	12
BP	GO:1903037	regulation of leukocyte cell-cell adhesion	26/406	336/18723	2.35e-08	1.73e-06	1.26e-06	CAV1/PTPRC/HLA-DPA1/CCL2/VCAM1/HLA-DQB1/HLA-DOA/HLA-DQA2/HLA-DRA/FOXJ1/CD74/IRF1/CCL5/HAS2/NR4A3/HLA-DPB1/ANXA1/RUNX1/HLA-DRB5/IGFBP2/HLA-DRB1/FGL2/HLA-DQB2/ICAM1/CD44/HLA-DQA1	26
BP	GO:1903900	regulation of viral life cycle	17/406	148/18723	2.35e-08	1.73e-06	1.26e-06	CXCL8/TOP2A/CAV2/OAS2/MX1/LTF/APOBEC3C/RSAD2/CD74/CCL5/PLSCR1/OAS3/PTX3/HLA-DRB1/CIITA/OAS1/ISG15	17
BP	GO:0052547	regulation of peptidase activity	31/406	461/18723	2.79e-08	2.01e-06	1.47e-06	C3/F3/CAV1/SERPINF1/IFI6/ANXA2/PLAUR/MBP/SERPINH1/SERPINA1/TIMP1/VEGFA/TFPI/CCN1/S100A8/FN1/LTF/THBS1/CD109/PTTG1/MMP9/SERPINE1/S100A9/CRB2/SFRP2/PROS1/AQP1/BIRC5/SERPING1/CD44/PCOLCE	31
BP	GO:0019058	viral life cycle	25/406	317/18723	3.03e-08	2.15e-06	1.57e-06	CXCL8/TOP2A/CAV1/CAV2/CCL2/EGFR/ITGA5/OAS2/MX1/LTF/APOBEC3C/RSAD2/CD74/ITGA2/CCL5/PLSCR1/OAS3/SIGLEC1/PTX3/CDK1/HLA-DRB1/CIITA/OAS1/ICAM1/ISG15	25
BP	GO:0002381	immunoglobulin production involved in immunoglobulin-mediated immune response	12/406	70/18723	3.14e-08	2.19e-06	1.6e-06	CLCF1/PTPRC/HLA-DPA1/HLA-DQB1/HLA-DOA/HLA-DQA2/HLA-DRA/HLA-DPB1/HLA-DRB5/HLA-DRB1/HLA-DQB2/HLA-DQA1	12
BP	GO:0045765	regulation of angiogenesis	26/406	342/18723	3.37e-08	2.31e-06	1.69e-06	C3/CXCL8/CHI3L1/F3/SERPINF1/ADAMTS1/THBS4/VEGFA/HOXA5/ITGA5/ANGPT2/CYP1B1/C5AR1/SULF1/COL4A2/THBS1/CXCL10/TGFB2/SP100/SERPINE1/GADD45A/STAT1/RUNX1/SFRP2/HSPG2/AQP1	26
BP	GO:0042730	fibrinolysis	8/406	25/18723	3.57e-08	2.41e-06	1.76e-06	THBD/ANXA2/THBS1/SERPINE1/PLAT/PLAU/PROS1/SERPING1	8
BP	GO:0050818	regulation of coagulation	12/406	71/18723	3.71e-08	2.46e-06	1.8e-06	F2RL1/THBD/F3/CAV1/ANXA2/TFPI/THBS1/SERPINE1/PLAT/PLAU/PROS1/SERPING1	12
BP	GO:0050900	leukocyte migration	27/406	369/18723	4.04e-08	2.62e-06	1.91e-06	F2RL1/CXCL8/THBS4/CCL2/VCAM1/VEGFA/S100A8/C5AR1/FOXJ1/SAA1/CD74/THBS1/ITGA2/CXCL10/CCL5/TGFB2/CXCL1/MMP9/SERPINE1/SLAMF8/S100A9/ANXA1/MMP14/IL1R1/MSN/ICAM1/PDGFD	27
BP	GO:0007160	cell-matrix adhesion	21/406	233/18723	4.08e-08	2.62e-06	1.91e-06	NPNT/JAG1/FBLN5/ACTN1/IQGAP1/VCAM1/VEGFA/POSTN/COL3A1/NID2/FN1/THBS1/ITGA2/CDK6/SERPINE1/SIGLEC1/PLAU/MMP14/ECM2/CD44/ITGA3	21
BP	GO:0071559	response to transforming growth factor beta	22/406	256/18723	4.56e-08	2.88e-06	2.11e-06	MXRA5/COL1A1/CAV1/NPNT/CAV2/LATS2/LTBP1/GDF15/VASN/COL1A2/POSTN/FMOD/COL3A1/SLC2A10/COL4A2/THBS1/TGFB2/CD109/SPRY1/FOLR1/PDGFD/ITGA3	22
BP	GO:1901342	regulation of vasculature development	26/406	348/18723	4.78e-08	2.98e-06	2.17e-06	C3/CXCL8/CHI3L1/F3/SERPINF1/ADAMTS1/THBS4/VEGFA/HOXA5/ITGA5/ANGPT2/CYP1B1/C5AR1/SULF1/COL4A2/THBS1/CXCL10/TGFB2/SP100/SERPINE1/GADD45A/STAT1/RUNX1/SFRP2/HSPG2/AQP1	26
BP	GO:0045861	negative regulation of proteolysis	26/406	351/18723	5.67e-08	3.48e-06	2.54e-06	C3/SERPINF1/PBK/IFI6/ANXA2/PLAUR/SERPINH1/SERPINA1/TIMP1/VEGFA/TFPI/LTF/THBS1/CD109/PTTG1/MMP9/SERPINE1/PLAT/CRB2/SFRP2/PROS1/GAS1/AQP1/BIRC5/SERPING1/CD44	26
BP	GO:0051783	regulation of nuclear division	16/406	139/18723	5.92e-08	3.58e-06	2.61e-06	MKI67/CAV2/AURKB/NEK2/RAD51AP1/LIF/BUB1B/BUB1/CCDC8/NDC80/AURKA/NUSAP1/CDC20/TRIP13/CCNB1/CENPF	16
BP	GO:0051346	negative regulation of hydrolase activity	27/406	379/18723	7.01e-08	4.17e-06	3.05e-06	C3/SERPINF1/IFI6/ANXA2/PLAUR/SERPINH1/SERPINA1/TIMP1/VEGFA/TFPI/LTF/THBS1/TGFB2/CD109/PTTG1/MMP9/SERPINE1/SPRY1/CRB2/ANXA1/PTX3/SFRP2/PROS1/AQP1/BIRC5/SERPING1/CD44	27
BP	GO:0007178	transmembrane receptor protein serine/threonine kinase signaling pathway	26/406	355/18723	7.11e-08	4.18e-06	3.05e-06	CAV1/NPNT/CAV2/LATS2/LTBP1/GDF15/VASN/COL1A2/FMOD/COL3A1/SLC2A10/CCN1/SULF1/SFRP4/THBS1/TGFB2/CD109/DKK1/FSTL1/SPRY1/CRB2/SFRP2/EGR1/VIM/FOLR1/ITGA3	26
BP	GO:0034341	response to interferon-gamma	16/406	141/18723	7.25e-08	4.2e-06	3.06e-06	HLA-DPA1/CCL2/PARP9/CD74/IRF1/CCL5/SP100/STAT1/CD58/GBP2/GBP1/VIM/GBP3/CIITA/SLC11A1/ICAM1	16
BP	GO:0097529	myeloid leukocyte migration	20/406	220/18723	7.45e-08	4.26e-06	3.11e-06	CXCL8/THBS4/CCL2/VEGFA/S100A8/C5AR1/SAA1/CD74/THBS1/CXCL10/CCL5/TGFB2/CXCL1/SERPINE1/SLAMF8/S100A9/ANXA1/MMP14/IL1R1/PDGFD	20
BP	GO:0070372	regulation of ERK1 and ERK2 cascade	24/406	309/18723	7.67e-08	4.32e-06	3.15e-06	F2RL1/CHI3L1/NPNT/PTPRC/FAM83D/CCL2/EGFR/SPRY4/CCN1/LIF/C5AR1/FN1/PLA2G5/CD74/ATF3/CCL5/ANGPT1/SPRY1/GBP1/HLA-DRB1/PLA2G2A/ICAM1/PDGFD/CD44	24
BP	GO:0051983	regulation of chromosome segregation	13/406	91/18723	8.02e-08	4.46e-06	3.26e-06	MKI67/UBE2C/KIF2C/AURKB/TACC3/BUB1B/BUB1/NDC80/PTTG1/PLSCR1/TRIP13/CCNB1/CENPF	13
BP	GO:0048525	negative regulation of viral process	13/406	92/18723	9.16e-08	5.02e-06	3.67e-06	OAS2/MX1/LTF/APOBEC3C/RSAD2/CCL5/PLSCR1/OAS3/STAT1/PTX3/CIITA/OAS1/ISG15	13
BP	GO:0007492	endoderm development	12/406	77/18723	9.47e-08	5.12e-06	3.74e-06	COL5A2/LAMC1/ITGA5/DUSP5/FN1/COL4A2/DKK1/MMP9/COL5A1/MMP14/ARC/LAMB1	12
BP	GO:0071560	cellular response to transforming growth factor beta stimulus	21/406	250/18723	1.36e-07	7.18e-06	5.25e-06	COL1A1/CAV1/NPNT/CAV2/LATS2/LTBP1/GDF15/VASN/COL1A2/POSTN/FMOD/COL3A1/SLC2A10/COL4A2/THBS1/TGFB2/CD109/SPRY1/FOLR1/PDGFD/ITGA3	21
BP	GO:0090307	mitotic spindle assembly	11/406	65/18723	1.36e-07	7.18e-06	5.25e-06	KIF15/KIF11/MYBL2/AURKB/NEK2/KIFC1/PRC1/TPX2/FLNA/CDC20/KIF4A	11
BP	GO:1903034	regulation of response to wounding	17/406	167/18723	1.41e-07	7.33e-06	5.36e-06	F2RL1/THBD/F3/CAV1/ANXA2/SPP1/TFPI/TNFRSF12A/THBS1/CD109/SERPINE1/PLAT/PLAU/ANXA1/PROS1/FLNA/SERPING1	17
BP	GO:0097530	granulocyte migration	16/406	148/18723	1.43e-07	7.35e-06	5.37e-06	CXCL8/THBS4/CCL2/S100A8/C5AR1/SAA1/CD74/THBS1/CXCL10/CCL5/TGFB2/CXCL1/SLAMF8/S100A9/ANXA1/IL1R1	16
BP	GO:0070486	leukocyte aggregation	6/406	13/18723	1.51e-07	7.67e-06	5.61e-06	S100A8/HAS2/NR4A3/S100A9/MSN/CD44	6
BP	GO:0032102	negative regulation of response to external stimulus	28/406	420/18723	1.6e-07	7.99e-06	5.84e-06	THBD/HAMP/SOCS3/PTPRC/SERPINF1/PBK/ANXA2/CCL2/TNFAIP6/SPP1/ANGPT2/TFPI/LTF/SAA1/THBS1/CD109/SERPINE1/OAS3/PLAT/SLAMF8/PLAU/PROS1/HLA-DRB1/CARTPT/OAS1/FGL2/SERPING1/ISG15	28
BP	GO:0019221	cytokine-mediated signaling pathway	30/406	472/18723	1.61e-07	7.99e-06	5.84e-06	F2RL1/CXCL8/CLCF1/F3/CAV1/PTPRC/OSMR/IL1RAP/TNFRSF19/CCL2/IL13RA2/OAS2/MX1/PARP9/CD74/PLP2/CXCL10/IRF1/CCL5/CXCL1/SP100/ANGPT1/OAS3/STAT1/CRLF1/EGR1/IL1R1/OAS1/CD44/ISG15	30
BP	GO:0002685	regulation of leukocyte migration	19/406	210/18723	1.71e-07	8.34e-06	6.09e-06	F2RL1/CXCL8/THBS4/CCL2/VEGFA/C5AR1/CD74/THBS1/ITGA2/CXCL10/CCL5/SERPINE1/SLAMF8/ANXA1/MMP14/IL1R1/MSN/ICAM1/PDGFD	19
BP	GO:0014909	smooth muscle cell migration	13/406	97/18723	1.73e-07	8.34e-06	6.09e-06	ADAMTS1/IQGAP1/S100A11/IGFBP3/POSTN/ITGA2/CCL5/HAS2/NR4A3/SERPINE1/PLAT/PLAU/PDGFD	13
BP	GO:0070482	response to oxygen levels	25/406	347/18723	1.74e-07	8.34e-06	6.09e-06	COL1A1/NDNF/CAV1/SOD2/VCAM1/VASN/VEGFA/POSTN/CCNA2/ANGPT2/LOXL2/THBS1/ITGA2/TGFB2/PDLIM1/PLAT/PLAU/PDPN/EGR1/MMP14/NAMPT/TRH/AQP1/ICAM1/CCNB1	25
BP	GO:0090092	regulation of transmembrane receptor protein serine/threonine kinase signaling pathway	21/406	256/18723	2.03e-07	9.6e-06	7.01e-06	CAV1/NPNT/CAV2/LATS2/LTBP1/GDF15/VASN/SLC2A10/CCN1/SULF1/SFRP4/THBS1/TGFB2/CD109/DKK1/FSTL1/SPRY1/CRB2/SFRP2/FOLR1/ITGA3	21
BP	GO:0001706	endoderm formation	10/406	54/18723	2.1e-07	9.82e-06	7.18e-06	COL5A2/ITGA5/DUSP5/FN1/COL4A2/DKK1/MMP9/COL5A1/MMP14/LAMB1	10
BP	GO:0061041	regulation of wound healing	15/406	134/18723	2.22e-07	1.03e-05	7.51e-06	F2RL1/THBD/F3/CAV1/ANXA2/TFPI/TNFRSF12A/THBS1/CD109/SERPINE1/PLAT/PLAU/ANXA1/PROS1/SERPING1	15
BP	GO:0002687	positive regulation of leukocyte migration	15/406	135/18723	2.45e-07	1.12e-05	8.19e-06	F2RL1/CXCL8/THBS4/VEGFA/C5AR1/CD74/THBS1/ITGA2/CXCL10/CCL5/SERPINE1/MMP14/IL1R1/ICAM1/PDGFD	15
BP	GO:0009612	response to mechanical stimulus	19/406	216/18723	2.65e-07	1.18e-05	8.65e-06	CHI3L1/COL1A1/EGFR/POSTN/COL3A1/ANGPT2/FOSL1/THBS1/ITGA2/CXCL10/IRF1/GADD45A/STAT1/IGFBP2/MMP14/AQP1/MAG/CCNB1/TNC	19
BP	GO:0050870	positive regulation of T cell activation	19/406	216/18723	2.65e-07	1.18e-05	8.65e-06	CAV1/PTPRC/HLA-DPA1/CCL2/VCAM1/HLA-DQB1/HLA-DOA/HLA-DQA2/HLA-DRA/CD74/CCL5/HLA-DPB1/ANXA1/RUNX1/HLA-DRB5/IGFBP2/HLA-DRB1/HLA-DQB2/HLA-DQA1	19
BP	GO:0052548	regulation of endopeptidase activity	28/406	432/18723	2.84e-07	1.26e-05	9.17e-06	C3/F3/SERPINF1/IFI6/ANXA2/PLAUR/MBP/SERPINH1/SERPINA1/TIMP1/VEGFA/TFPI/CCN1/S100A8/LTF/THBS1/CD109/PTTG1/MMP9/SERPINE1/S100A9/CRB2/SFRP2/PROS1/AQP1/BIRC5/SERPING1/CD44	28
BP	GO:0045069	regulation of viral genome replication	12/406	85/18723	2.9e-07	1.27e-05	9.27e-06	CXCL8/TOP2A/OAS2/MX1/LTF/APOBEC3C/RSAD2/CCL5/PLSCR1/OAS3/OAS1/ISG15	12
BP	GO:0045071	negative regulation of viral genome replication	10/406	56/18723	3.01e-07	1.3e-05	9.52e-06	OAS2/MX1/LTF/APOBEC3C/RSAD2/CCL5/PLSCR1/OAS3/OAS1/ISG15	10
BP	GO:0002064	epithelial cell development	19/406	220/18723	3.52e-07	1.51e-05	1.1e-05	F2RL1/HAPLN2/JAG1/IQGAP1/VEGFA/MET/HOXA5/FOSL2/ST14/FOXJ1/ACTA2/TYMS/S1PR3/CDK6/SDC1/VIM/FLNA/MSN/ICAM1	19
BP	GO:0001704	formation of primary germ layer	14/406	121/18723	3.74e-07	1.59e-05	1.16e-05	COL5A2/ITGA5/DUSP5/FN1/COL4A2/ITGA2/DKK1/MMP9/COL5A1/CRB2/SFRP2/MMP14/LAMB1/ITGA3	14
BP	GO:0032963	collagen metabolic process	13/406	104/18723	3.97e-07	1.65e-05	1.21e-05	COL1A1/SERPINH1/MRC2/COL1A2/ITGA2/MMP9/COL5A1/MFAP4/RUNX1/P3H2/MMP14/VIM/CIITA	13
BP	GO:0033627	cell adhesion mediated by integrin	11/406	72/18723	4.02e-07	1.65e-05	1.21e-05	NPNT/ITGA5/CYP1B1/LIF/ITGA2/CCL5/TGFB2/SERPINE1/PLAU/SFRP2/ICAM1	11
BP	GO:1905818	regulation of chromosome separation	11/406	72/18723	4.02e-07	1.65e-05	1.21e-05	UBE2C/AURKB/TACC3/BUB1B/BUB1/NDC80/PTTG1/PLSCR1/TRIP13/CCNB1/CENPF	11
BP	GO:1990266	neutrophil migration	14/406	122/18723	4.15e-07	1.69e-05	1.23e-05	CXCL8/THBS4/CCL2/S100A8/C5AR1/SAA1/CD74/CXCL10/CCL5/TGFB2/CXCL1/SLAMF8/S100A9/IL1R1	14
BP	GO:0002468	dendritic cell antigen processing and presentation	6/406	15/18723	4.25e-07	1.71e-05	1.25e-05	HLA-DRA/CD74/THBS1/HLA-DRB1/FGL2/SLC11A1	6
BP	GO:0035987	endodermal cell differentiation	9/406	45/18723	4.31e-07	1.71e-05	1.25e-05	COL5A2/ITGA5/FN1/COL4A2/DKK1/MMP9/COL5A1/MMP14/LAMB1	9
BP	GO:0016032	viral process	27/406	415/18723	4.32e-07	1.71e-05	1.25e-05	CXCL8/TOP2A/CAV1/CAV2/CCL2/EGFR/ITGA5/OAS2/MX1/PARP9/LTF/APOBEC3C/RSAD2/CD74/ITGA2/CCL5/PLSCR1/OAS3/SIGLEC1/STAT1/PTX3/CDK1/HLA-DRB1/CIITA/OAS1/ICAM1/ISG15	27
BP	GO:0014910	regulation of smooth muscle cell migration	12/406	89/18723	4.84e-07	1.9e-05	1.38e-05	ADAMTS1/IQGAP1/S100A11/IGFBP3/POSTN/ITGA2/CCL5/HAS2/NR4A3/SERPINE1/PLAU/PDGFD	12
BP	GO:0071621	granulocyte chemotaxis	14/406	125/18723	5.6e-07	2.17e-05	1.59e-05	CXCL8/THBS4/CCL2/S100A8/C5AR1/SAA1/CD74/THBS1/CXCL10/CCL5/TGFB2/CXCL1/S100A9/ANXA1	14
BP	GO:0007051	spindle organization	17/406	184/18723	5.67e-07	2.18e-05	1.59e-05	KIF15/KIF11/MYBL2/AURKB/NEK2/KIFC1/NUF2/TACC3/NDC80/AURKA/CCNB2/PRC1/TPX2/FLNA/CDC20/CCNB1/KIF4A	17
BP	GO:0036293	response to decreased oxygen levels	23/406	322/18723	6.34e-07	2.4e-05	1.76e-05	NDNF/CAV1/SOD2/VCAM1/VASN/VEGFA/POSTN/CCNA2/ANGPT2/LOXL2/THBS1/ITGA2/TGFB2/PDLIM1/PLAT/PLAU/EGR1/MMP14/NAMPT/TRH/AQP1/ICAM1/CCNB1	23
BP	GO:0014911	positive regulation of smooth muscle cell migration	9/406	47/18723	6.38e-07	2.4e-05	1.76e-05	ADAMTS1/IQGAP1/S100A11/POSTN/ITGA2/CCL5/HAS2/NR4A3/PDGFD	9
BP	GO:0071356	cellular response to tumor necrosis factor	19/406	229/18723	6.52e-07	2.44e-05	1.78e-05	F2RL1/CXCL8/HAMP/CHI3L1/COL1A1/NPNT/TNFRSF19/CCL2/VCAM1/POSTN/THBS1/CCL5/HAS2/STAT1/CD58/GBP2/GBP1/GBP3/ICAM1	19
BP	GO:0061448	connective tissue development	20/406	252/18723	6.71e-07	2.49e-05	1.82e-05	CHI3L1/COL1A1/SNORC/SERPINH1/TIMP1/HOXA5/SCIN/CCN1/LUM/LOXL2/ACTA2/SULF1/TYMS/COL5A1/RUNX1/SFRP2/EGR1/MGP/PDGFD/CD44	20
BP	GO:0032103	positive regulation of response to external stimulus	27/406	427/18723	7.53e-07	2.76e-05	2.02e-05	F2RL1/THBD/C3/CXCL8/F3/OSMR/THBS4/EGFR/VEGFA/MET/S100A8/CTSC/C5AR1/ALOX5AP/PARP9/PLA2G5/CD74/THBS1/ITGA2/CXCL10/CCL5/SERPINE1/PLSCR1/S100A9/FLNA/PLA2G2A/PDGFD	27
BP	GO:0007088	regulation of mitotic nuclear division	13/406	110/18723	7.65e-07	2.78e-05	2.03e-05	MKI67/CAV2/AURKB/NEK2/BUB1B/BUB1/CCDC8/NDC80/AURKA/NUSAP1/TRIP13/CCNB1/CENPF	13
BP	GO:0048146	positive regulation of fibroblast proliferation	9/406	48/18723	7.7e-07	2.78e-05	2.03e-05	ANXA2/CCNA2/FOSL2/FN1/CD74/CDK6/AQP1/PDGFD/CCNB1	9
BP	GO:0007162	negative regulation of cell adhesion	22/406	303/18723	8.47e-07	3.03e-05	2.21e-05	COL1A1/PTPRC/JAG1/MBP/SPRY4/VEGFA/POSTN/ANGPT2/CYP1B1/FOXJ1/CD74/THBS1/IRF1/SERPINE1/ANGPT1/ANXA1/RUNX1/GBP1/MMP14/HLA-DRB1/FGL2/TNC	22
BP	GO:0030195	negative regulation of blood coagulation	9/406	49/18723	9.25e-07	3.28e-05	2.4e-05	THBD/ANXA2/TFPI/THBS1/SERPINE1/PLAT/PLAU/PROS1/SERPING1	9
BP	GO:0002526	acute inflammatory response	13/406	112/18723	9.43e-07	3.31e-05	2.42e-05	C3/HAMP/F3/CD163/OSMR/VCAM1/SERPINA1/S100A8/ALOX5AP/FN1/SAA1/PLSCR1/ICAM1	13
BP	GO:0042110	T cell activation	29/406	487/18723	9.95e-07	3.47e-05	2.53e-05	F2RL1/CAV1/PTPRC/HLA-DPA1/CCL2/VCAM1/HLA-DQB1/HLA-DOA/HLA-DQA2/HLA-DRA/FOXJ1/RSAD2/CD74/IRF1/CCL5/HLA-DPB1/ANXA1/RUNX1/HLA-DRB5/IGFBP2/EGR1/HLA-DRB1/FGL2/MSN/HLA-DQB2/SLC11A1/ICAM1/CD44/HLA-DQA1	29
BP	GO:0001666	response to hypoxia	22/406	307/18723	1.06e-06	3.65e-05	2.66e-05	NDNF/CAV1/SOD2/VCAM1/VASN/VEGFA/POSTN/CCNA2/ANGPT2/LOXL2/THBS1/ITGA2/TGFB2/PDLIM1/PLAT/PLAU/EGR1/MMP14/TRH/AQP1/ICAM1/CCNB1	22
BP	GO:0002696	positive regulation of leukocyte activation	26/406	409/18723	1.1e-06	3.75e-05	2.74e-05	F2RL1/HAMP/CLCF1/CAV1/PTPRC/HLA-DPA1/CCL2/VCAM1/HLA-DQB1/HLA-DOA/HLA-DQA2/HLA-DRA/CTSC/CD74/THBS1/CCL5/NR4A3/HLA-DPB1/ANXA1/RUNX1/HLA-DRB5/IGFBP2/MMP14/HLA-DRB1/HLA-DQB2/HLA-DQA1	26
BP	GO:1900047	negative regulation of hemostasis	9/406	50/18723	1.11e-06	3.75e-05	2.74e-05	THBD/ANXA2/TFPI/THBS1/SERPINE1/PLAT/PLAU/PROS1/SERPING1	9
BP	GO:0051304	chromosome separation	12/406	96/18723	1.11e-06	3.75e-05	2.74e-05	TOP2A/UBE2C/AURKB/TACC3/BUB1B/BUB1/NDC80/PTTG1/PLSCR1/TRIP13/CCNB1/CENPF	12
BP	GO:0010965	regulation of mitotic sister chromatid separation	10/406	65/18723	1.27e-06	4.22e-05	3.08e-05	UBE2C/AURKB/TACC3/BUB1B/BUB1/NDC80/PTTG1/TRIP13/CCNB1/CENPF	10
BP	GO:0051310	metaphase plate congression	10/406	65/18723	1.27e-06	4.22e-05	3.08e-05	CDCA8/FAM83D/KIF2C/AURKB/GEM/KIFC1/NUF2/NDC80/CCNB1/CENPF	10
BP	GO:0007584	response to nutrient	16/406	174/18723	1.3e-06	4.27e-05	3.12e-05	HAMP/COL1A1/SOD2/VCAM1/EGFR/SPP1/POSTN/C2/TYMS/ITGA2/CXCL10/STAT1/SFRP2/IGFBP2/FOLR1/TNC	16
BP	GO:0050918	positive chemotaxis	10/406	66/18723	1.47e-06	4.8e-05	3.5e-05	F2RL1/CXCL8/F3/VEGFA/MET/ANGPT2/ITGA2/CXCL10/CCL5/ANGPT1	10
BP	GO:0002697	regulation of immune effector process	23/406	339/18723	1.54e-06	4.99e-05	3.64e-05	F2RL1/C3/CLCF1/PTPRC/IL13RA2/CD22/HLA-DRA/AHR/FOXJ1/RSAD2/PLA2G5/CD74/TGFB2/NR4A3/ANGPT1/SLAMF8/ANXA1/CFH/HLA-DRB1/IL1R1/FGL2/SERPING1/ICAM1	23
BP	GO:0051225	spindle assembly	13/406	117/18723	1.56e-06	5e-05	3.65e-05	KIF15/KIF11/MYBL2/AURKB/NEK2/KIFC1/AURKA/CCNB2/PRC1/TPX2/FLNA/CDC20/KIF4A	13
BP	GO:0007179	transforming growth factor beta receptor signaling pathway	17/406	198/18723	1.58e-06	5.04e-05	3.68e-05	CAV1/NPNT/CAV2/LATS2/LTBP1/GDF15/VASN/COL1A2/FMOD/COL3A1/SLC2A10/THBS1/TGFB2/CD109/SPRY1/FOLR1/ITGA3	17
BP	GO:0051306	mitotic sister chromatid separation	10/406	67/18723	1.7e-06	5.36e-05	3.92e-05	UBE2C/AURKB/TACC3/BUB1B/BUB1/NDC80/PTTG1/TRIP13/CCNB1/CENPF	10
BP	GO:0071346	cellular response to interferon-gamma	13/406	118/18723	1.72e-06	5.39e-05	3.93e-05	HLA-DPA1/CCL2/PARP9/IRF1/CCL5/SP100/STAT1/CD58/GBP2/GBP1/VIM/GBP3/ICAM1	13
BP	GO:0050867	positive regulation of cell activation	26/406	420/18723	1.8e-06	5.55e-05	4.05e-05	F2RL1/HAMP/CLCF1/CAV1/PTPRC/HLA-DPA1/CCL2/VCAM1/HLA-DQB1/HLA-DOA/HLA-DQA2/HLA-DRA/CTSC/CD74/THBS1/CCL5/NR4A3/HLA-DPB1/ANXA1/RUNX1/HLA-DRB5/IGFBP2/MMP14/HLA-DRB1/HLA-DQB2/HLA-DQA1	26
BP	GO:0006959	humoral immune response	22/406	317/18723	1.8e-06	5.55e-05	4.05e-05	C3/CXCL8/PTPRC/CCL2/HLA-DQB1/CFI/C7/FOXJ1/LTF/C2/CXCL10/C1RL/C1R/CXCL1/S100A9/MFAP4/CFH/HLA-DRB1/C1S/SLC11A1/SERPING1/LYZ	22
BP	GO:0050819	negative regulation of coagulation	9/406	53/18723	1.85e-06	5.67e-05	4.14e-05	THBD/ANXA2/TFPI/THBS1/SERPINE1/PLAT/PLAU/PROS1/SERPING1	9
BP	GO:0071774	response to fibroblast growth factor	13/406	120/18723	2.08e-06	6.33e-05	4.62e-05	CXCL8/COL1A1/NDNF/SHCBP1/CCL2/SPRY4/POSTN/SULF1/THBS1/CCL5/SPRY1/CD44/TNC	13
BP	GO:0043410	positive regulation of MAPK cascade	28/406	480/18723	2.29e-06	6.92e-05	5.06e-05	F2RL1/CHI3L1/NPNT/PTPRC/CAV2/IQGAP1/TNFRSF19/CCL2/GDF15/EGFR/VEGFA/LIF/C5AR1/PLA2G5/CD74/THBS1/CCL5/TGFB2/DKK1/ANGPT1/GADD45A/IQGAP3/HLA-DRB1/CARTPT/PLA2G2A/ICAM1/PDGFD/CD44	28
BP	GO:0030593	neutrophil chemotaxis	12/406	103/18723	2.37e-06	7.12e-05	5.2e-05	CXCL8/THBS4/CCL2/S100A8/C5AR1/SAA1/CD74/CXCL10/CCL5/TGFB2/CXCL1/S100A9	12
BP	GO:0050921	positive regulation of chemotaxis	14/406	141/18723	2.41e-06	7.19e-05	5.25e-05	F2RL1/CXCL8/F3/THBS4/VEGFA/MET/C5AR1/CD74/THBS1/ITGA2/CXCL10/CCL5/SERPINE1/PDGFD	14
BP	GO:0072006	nephron development	14/406	142/18723	2.63e-06	7.77e-05	5.68e-05	NPNT/JAG1/IQGAP1/VEGFA/ANGPT2/LIF/FOXJ1/ACTA2/SULF1/ANGPT1/STAT1/EGR1/PDGFD/ITGA3	14
BP	GO:0034612	response to tumor necrosis factor	19/406	253/18723	2.9e-06	8.5e-05	6.21e-05	F2RL1/CXCL8/HAMP/CHI3L1/COL1A1/NPNT/TNFRSF19/CCL2/VCAM1/POSTN/THBS1/CCL5/HAS2/STAT1/CD58/GBP2/GBP1/GBP3/ICAM1	19
BP	GO:0007369	gastrulation	16/406	185/18723	2.91e-06	8.5e-05	6.21e-05	COL5A2/MBP/ITGA5/DUSP5/FN1/COL4A2/ITGA2/NR4A3/DKK1/MMP9/COL5A1/CRB2/SFRP2/MMP14/LAMB1/ITGA3	16
BP	GO:0030595	leukocyte chemotaxis	18/406	230/18723	2.96e-06	8.57e-05	6.26e-05	F2RL1/CXCL8/THBS4/CCL2/VEGFA/S100A8/C5AR1/SAA1/CD74/THBS1/CXCL10/CCL5/TGFB2/CXCL1/SERPINE1/SLAMF8/S100A9/ANXA1	18
BP	GO:0072567	chemokine (C-X-C motif) ligand 2 production	6/406	20/18723	3e-06	8.57e-05	6.26e-05	F2RL1/MBP/POSTN/CD74/OAS3/OAS1	6
BP	GO:2000341	regulation of chemokine (C-X-C motif) ligand 2 production	6/406	20/18723	3e-06	8.57e-05	6.26e-05	F2RL1/MBP/POSTN/CD74/OAS3/OAS1	6
BP	GO:0002683	negative regulation of immune system process	26/406	434/18723	3.27e-06	9.28e-05	6.78e-05	PTPRC/CCL2/HLA-DOA/IL13RA2/CD22/COL3A1/AHR/FOXJ1/LTF/CD74/THBS1/IRF1/TGFB2/CDK6/ANGPT1/OAS3/SLAMF8/ANXA1/RUNX1/GBP1/HLA-DRB1/CARTPT/OAS1/FGL2/SERPING1/ISG15	26
BP	GO:0050863	regulation of T cell activation	22/406	329/18723	3.3e-06	9.28e-05	6.78e-05	CAV1/PTPRC/HLA-DPA1/CCL2/VCAM1/HLA-DQB1/HLA-DOA/HLA-DQA2/HLA-DRA/FOXJ1/CD74/IRF1/CCL5/HLA-DPB1/ANXA1/RUNX1/HLA-DRB5/IGFBP2/HLA-DRB1/FGL2/HLA-DQB2/HLA-DQA1	22
BP	GO:0033045	regulation of sister chromatid segregation	10/406	72/18723	3.33e-06	9.31e-05	6.8e-05	UBE2C/AURKB/TACC3/BUB1B/BUB1/NDC80/PTTG1/TRIP13/CCNB1/CENPF	10
BP	GO:0033046	negative regulation of sister chromatid segregation	8/406	43/18723	3.4e-06	9.33e-05	6.82e-05	AURKB/BUB1B/BUB1/NDC80/PTTG1/TRIP13/CCNB1/CENPF	8
BP	GO:0033048	negative regulation of mitotic sister chromatid segregation	8/406	43/18723	3.4e-06	9.33e-05	6.82e-05	AURKB/BUB1B/BUB1/NDC80/PTTG1/TRIP13/CCNB1/CENPF	8
BP	GO:2000816	negative regulation of mitotic sister chromatid separation	8/406	43/18723	3.4e-06	9.33e-05	6.82e-05	AURKB/BUB1B/BUB1/NDC80/PTTG1/TRIP13/CCNB1/CENPF	8
BP	GO:0002440	production of molecular mediator of immune response	21/406	308/18723	4.07e-06	0.000110849	8.1e-05	F2RL1/CLCF1/PTPRC/HLA-DPA1/HLA-DQB1/HLA-DOA/IL13RA2/HLA-DQA2/CD22/HLA-DRA/RSAD2/CD74/TGFB2/NR4A3/ANGPT1/HLA-DPB1/HLA-DRB5/HLA-DRB1/IL1R1/HLA-DQB2/HLA-DQA1	21
BP	GO:0051216	cartilage development	16/406	190/18723	4.12e-06	0.000111417	8.14e-05	CHI3L1/COL1A1/SNORC/SERPINH1/TIMP1/HOXA5/SCIN/CCN1/LUM/LOXL2/SULF1/TYMS/RUNX1/SFRP2/MGP/CD44	16
BP	GO:0060326	cell chemotaxis	21/406	310/18723	4.5e-06	0.000121012	8.84e-05	F2RL1/CXCL8/THBS4/CCL2/VCAM1/VEGFA/MET/S100A8/C5AR1/SAA1/CD74/THBS1/CXCL10/CCL5/TGFB2/CXCL1/SERPINE1/SLAMF8/S100A9/ANXA1/PDGFD	21
BP	GO:0016525	negative regulation of angiogenesis	14/406	149/18723	4.64e-06	0.000123188	9e-05	SERPINF1/ADAMTS1/THBS4/HOXA5/ANGPT2/SULF1/COL4A2/THBS1/CXCL10/TGFB2/SERPINE1/GADD45A/STAT1/HSPG2	14
BP	GO:0007259	receptor signaling pathway via JAK-STAT	15/406	170/18723	4.64e-06	0.000123188	9e-05	HAMP/CLCF1/SOCS3/CAV1/PTPRC/CCL2/OCIAD2/CYP1B1/LIF/PARP9/CCL5/GADD45A/STAT1/SOCS2/CRLF1	15
BP	GO:0051985	negative regulation of chromosome segregation	8/406	45/18723	4.87e-06	0.00012758	9.32e-05	AURKB/BUB1B/BUB1/NDC80/PTTG1/TRIP13/CCNB1/CENPF	8
BP	GO:1905819	negative regulation of chromosome separation	8/406	45/18723	4.87e-06	0.00012758	9.32e-05	AURKB/BUB1B/BUB1/NDC80/PTTG1/TRIP13/CCNB1/CENPF	8
BP	GO:0043588	skin development	19/406	263/18723	5.11e-06	0.000132963	9.71e-05	COL5A2/COL1A1/FA2H/JAG1/TNFRSF19/EGFR/COL1A2/MET/FZD6/COL3A1/SLC2A10/FOSL2/ST14/ITGA2/TGFB2/CD109/COL5A1/ANXA1/ITGA3	19
BP	GO:0033273	response to vitamin	11/406	93/18723	5.39e-06	0.000137576	0.000100502	HAMP/COL1A1/SOD2/EGFR/SPP1/POSTN/TYMS/ITGA2/CXCL10/FOLR1/TNC	11
BP	GO:0050730	regulation of peptidyl-tyrosine phosphorylation	19/406	264/18723	5.4e-06	0.000137576	0.000100502	CLCF1/SOCS3/CAV1/PTPRC/IQGAP1/THBS4/EGFR/VEGFA/ITGA5/LIF/PARP9/CD74/CCL5/ANGPT1/SFRP2/CRLF1/ICAM1/PDGFD/CD44	19
BP	GO:0044409	entry into host	14/406	151/18723	5.42e-06	0.000137576	0.000100502	CXCL8/CAV1/CAV2/EGFR/ITGA5/CD74/ITGA2/PLSCR1/SIGLEC1/PTX3/CDK1/HLA-DRB1/CIITA/ICAM1	14
BP	GO:2000181	negative regulation of blood vessel morphogenesis	14/406	151/18723	5.42e-06	0.000137576	0.000100502	SERPINF1/ADAMTS1/THBS4/HOXA5/ANGPT2/SULF1/COL4A2/THBS1/CXCL10/TGFB2/SERPINE1/GADD45A/STAT1/HSPG2	14
BP	GO:0031100	animal organ regeneration	10/406	76/18723	5.49e-06	0.000138381	0.000101089	HAMP/EGFR/CCNA2/ANGPT2/C5AR1/TYMS/NR4A3/AURKA/CDK1/NNMT	10
BP	GO:0019079	viral genome replication	13/406	131/18723	5.56e-06	0.000139294	0.000101757	CXCL8/TOP2A/CCL2/OAS2/MX1/LTF/APOBEC3C/RSAD2/CCL5/PLSCR1/OAS3/OAS1/ISG15	13
BP	GO:0051607	defense response to virus	19/406	265/18723	5.7e-06	0.000141204	0.000103152	F2RL1/PTPRC/IFI6/OAS2/MX1/PARP9/APOBEC3C/RSAD2/CXCL10/IRF1/PLSCR1/OAS3/RNASE2/STAT1/GBP1/GBP3/OAS1/FGL2/ISG15	19
BP	GO:0140546	defense response to symbiont	19/406	265/18723	5.7e-06	0.000141204	0.000103152	F2RL1/PTPRC/IFI6/OAS2/MX1/PARP9/APOBEC3C/RSAD2/CXCL10/IRF1/PLSCR1/OAS3/RNASE2/STAT1/GBP1/GBP3/OAS1/FGL2/ISG15	19
BP	GO:0033047	regulation of mitotic sister chromatid segregation	8/406	46/18723	5.79e-06	0.000142388	0.000104017	AURKB/BUB1B/BUB1/NDC80/PTTG1/TRIP13/CCNB1/CENPF	8
BP	GO:0009615	response to virus	23/406	367/18723	5.82e-06	0.000142388	0.000104017	F2RL1/PTPRC/IFI6/OAS2/MX1/PARP9/APOBEC3C/RSAD2/FOSL1/ACTA2/CXCL10/IRF1/CCL5/CDK6/PLSCR1/OAS3/RNASE2/STAT1/GBP1/GBP3/OAS1/FGL2/ISG15	23
BP	GO:1901343	negative regulation of vasculature development	14/406	152/18723	5.86e-06	0.000142438	0.000104053	SERPINF1/ADAMTS1/THBS4/HOXA5/ANGPT2/SULF1/COL4A2/THBS1/CXCL10/TGFB2/SERPINE1/GADD45A/STAT1/HSPG2	14
BP	GO:1903035	negative regulation of response to wounding	11/406	94/18723	5.99e-06	0.000144799	0.000105778	THBD/ANXA2/SPP1/TFPI/THBS1/CD109/SERPINE1/PLAT/PLAU/PROS1/SERPING1	11
BP	GO:0044344	cellular response to fibroblast growth factor stimulus	12/406	113/18723	6.32e-06	0.000150949	0.000110271	CXCL8/COL1A1/NDNF/SHCBP1/CCL2/SPRY4/POSTN/SULF1/THBS1/CCL5/SPRY1/CD44	12
BP	GO:0071347	cellular response to interleukin-1	12/406	113/18723	6.32e-06	0.000150949	0.000110271	CXCL8/CHI3L1/CCL2/TFPI/CCL5/HAS2/EGR1/GBP2/GBP1/GBP3/IL1R1/ICAM1	12
BP	GO:0061045	negative regulation of wound healing	10/406	78/18723	6.96e-06	0.000165384	0.000120816	THBD/ANXA2/TFPI/THBS1/CD109/SERPINE1/PLAT/PLAU/PROS1/SERPING1	10
BP	GO:0007091	metaphase/anaphase transition of mitotic cell cycle	9/406	62/18723	7.12e-06	0.000167365	0.000122263	UBE2C/AURKB/TACC3/BUB1B/BUB1/NDC80/TRIP13/CCNB1/CENPF	9
BP	GO:0032835	glomerulus development	9/406	62/18723	7.12e-06	0.000167365	0.000122263	JAG1/IQGAP1/ANGPT2/FOXJ1/ACTA2/SULF1/ANGPT1/EGR1/PDGFD	9
BP	GO:0002274	myeloid leukocyte activation	17/406	223/18723	7.91e-06	0.000183682	0.000134183	F2RL1/CXCL8/HAMP/PTPRC/IL13RA2/CTSC/C5AR1/CD74/THBS1/TLR1/CCL5/NR4A3/PLSCR1/NAMPT/SLC11A1/PLA2G2A/CD93	17
BP	GO:0050920	regulation of chemotaxis	17/406	223/18723	7.91e-06	0.000183682	0.000134183	F2RL1/CXCL8/F3/THBS4/CCL2/VEGFA/MET/ANGPT2/C5AR1/CD74/THBS1/ITGA2/CXCL10/CCL5/SERPINE1/SLAMF8/PDGFD	17
BP	GO:0018108	peptidyl-tyrosine phosphorylation	23/406	375/18723	8.28e-06	0.000191192	0.000139669	WEE1/CLCF1/SOCS3/CAV1/PTPRC/PBK/IQGAP1/THBS4/EGFR/VEGFA/MET/ITGA5/LIF/PARP9/MELK/CD74/CCL5/ANGPT1/SFRP2/CRLF1/ICAM1/PDGFD/CD44	23
BP	GO:0033002	muscle cell proliferation	18/406	248/18723	8.48e-06	0.000194598	0.000142157	ADAMTS1/SOD2/IGFBP3/EGFR/THBS1/ITGA2/CCL5/TGFB2/NR4A3/OGN/MMP9/ANGPT1/STAT1/RUNX1/CDK1/NAMPT/PDGFD/CCNB1	18
BP	GO:0008608	attachment of spindle microtubules to kinetochore	7/406	35/18723	8.52e-06	0.000194598	0.000142157	ECT2/KIF2C/AURKB/NEK2/NUF2/NDC80/CCNB1	7
BP	GO:0051303	establishment of chromosome localization	10/406	80/18723	8.76e-06	0.000199028	0.000145393	CDCA8/FAM83D/KIF2C/AURKB/GEM/KIFC1/NUF2/NDC80/CCNB1/CENPF	10
BP	GO:0018212	peptidyl-tyrosine modification	23/406	378/18723	9.42e-06	0.000212804	0.000155457	WEE1/CLCF1/SOCS3/CAV1/PTPRC/PBK/IQGAP1/THBS4/EGFR/VEGFA/MET/ITGA5/LIF/PARP9/MELK/CD74/CCL5/ANGPT1/SFRP2/CRLF1/ICAM1/PDGFD/CD44	23
BP	GO:0097696	receptor signaling pathway via STAT	15/406	181/18723	9.97e-06	0.000224031	0.000163659	HAMP/CLCF1/SOCS3/CAV1/PTPRC/CCL2/OCIAD2/CYP1B1/LIF/PARP9/CCL5/GADD45A/STAT1/SOCS2/CRLF1	15
BP	GO:0042063	gliogenesis	20/406	301/18723	1.01e-05	0.000225787	0.000164941	OPALIN/CLCF1/FA2H/LAMA2/CCL2/EGFR/S100A8/LIF/C5AR1/TGFB2/CDK6/CDKN2C/S100A9/ANXA1/CDK1/MMP14/VIM/NKX6-2/MAG/LAMB1	20
BP	GO:0044784	metaphase/anaphase transition of cell cycle	9/406	65/18723	1.06e-05	0.000235576	0.000172092	UBE2C/AURKB/TACC3/BUB1B/BUB1/NDC80/TRIP13/CCNB1/CENPF	9
BP	GO:0050000	chromosome localization	10/406	82/18723	1.1e-05	0.000242144	0.000176891	CDCA8/FAM83D/KIF2C/AURKB/GEM/KIFC1/NUF2/NDC80/CCNB1/CENPF	10
BP	GO:0050673	epithelial cell proliferation	25/406	437/18723	1.12e-05	0.000246576	0.000180128	F3/LAMC1/CAV1/CAV2/SERPINF1/THBS4/CCL2/EGFR/VEGFA/HOXA5/C5AR1/LOXL2/SULF1/THBS1/TGFB2/HAS2/NR4A3/CD109/CDK6/STAT1/SFRP2/IQGAP3/MMP14/COL8A2/LAMB1	25
BP	GO:0090287	regulation of cellular response to growth factor stimulus	20/406	304/18723	1.17e-05	0.000255586	0.00018671	CAV1/NPNT/CAV2/LATS2/LTBP1/VASN/SPRY4/ITGA5/SLC2A10/CCN1/SULF1/SFRP4/THBS1/CD109/FSTL1/SPRY1/CRB2/SFRP2/FOLR1/ITGA3	20
BP	GO:0050766	positive regulation of phagocytosis	9/406	66/18723	1.2e-05	0.000261949	0.000191358	F2RL1/C3/PTPRC/CCL2/PLA2G5/C2/ITGA2/PTX3/SLC11A1	9
BP	GO:0031579	membrane raft organization	6/406	25/18723	1.25e-05	0.000270693	0.000197746	MAL/FA2H/CAV1/PTPRC/CAV2/ANXA2	6
BP	GO:0050727	regulation of inflammatory response	23/406	386/18723	1.32e-05	0.000284149	0.000207576	C3/HAMP/SOCS3/PTPRC/SERPINF1/OSMR/PBK/TNFAIP6/EGFR/S100A8/CTSC/ALOX5AP/SAA1/ITGA2/CCL5/MMP9/SERPINE1/SLAMF8/S100A9/ANXA1/HLA-DRB1/IL1R1/PLA2G2A	23
BP	GO:0002688	regulation of leukocyte chemotaxis	12/406	122/18723	1.39e-05	0.000298161	0.000217812	F2RL1/CXCL8/THBS4/CCL2/VEGFA/C5AR1/CD74/THBS1/CXCL10/CCL5/SERPINE1/SLAMF8	12
BP	GO:0070555	response to interleukin-1	13/406	143/18723	1.45e-05	0.000308622	0.000225454	CXCL8/CHI3L1/CCL2/TFPI/CCL5/HAS2/ANXA1/EGR1/GBP2/GBP1/GBP3/IL1R1/ICAM1	13
BP	GO:0007094	mitotic spindle assembly checkpoint signaling	7/406	38/18723	1.51e-05	0.000317119	0.000231661	AURKB/BUB1B/BUB1/NDC80/TRIP13/CCNB1/CENPF	7
BP	GO:0071173	spindle assembly checkpoint signaling	7/406	38/18723	1.51e-05	0.000317119	0.000231661	AURKB/BUB1B/BUB1/NDC80/TRIP13/CCNB1/CENPF	7
BP	GO:0071174	mitotic spindle checkpoint signaling	7/406	38/18723	1.51e-05	0.000317119	0.000231661	AURKB/BUB1B/BUB1/NDC80/TRIP13/CCNB1/CENPF	7
BP	GO:0010812	negative regulation of cell-substrate adhesion	9/406	68/18723	1.54e-05	0.000322058	0.000235269	COL1A1/JAG1/SPRY4/POSTN/ANGPT2/THBS1/SERPINE1/GBP1/MMP14	9
BP	GO:0046718	viral entry into host cell	13/406	144/18723	1.56e-05	0.000324292	0.000236901	CAV1/CAV2/EGFR/ITGA5/CD74/ITGA2/PLSCR1/SIGLEC1/PTX3/CDK1/HLA-DRB1/CIITA/ICAM1	13
BP	GO:0050926	regulation of positive chemotaxis	6/406	26/18723	1.6e-05	0.000329873	0.000240978	F2RL1/CXCL8/F3/VEGFA/ANGPT2/ITGA2	6
BP	GO:0048762	mesenchymal cell differentiation	17/406	236/18723	1.66e-05	0.000341469	0.000249449	COL1A1/JAG1/S100A4/FAM83D/VASN/FN1/LOXL2/TGFB2/HAS2/RDH10/SPRY1/STAT1/CRB2/PDPN/SFRP2/FLNA/FOLR1	17
BP	GO:2000117	negative regulation of cysteine-type endopeptidase activity	10/406	86/18723	1.68e-05	0.00034342	0.000250874	IFI6/PLAUR/VEGFA/LTF/THBS1/MMP9/SFRP2/AQP1/BIRC5/CD44	10
BP	GO:0007568	aging	21/406	339/18723	1.76e-05	0.00035849	0.000261883	HAMP/SERPINF1/SOD2/VCAM1/AURKB/TIMP1/CDK2/CTSC/LOXL2/TYMS/COL4A2/FOXM1/CDK6/DKK1/SERPINE1/BCL2A1/IGFBP2/CDK1/NAMPT/SERPING1/ICAM1	21
BP	GO:0031577	spindle checkpoint signaling	7/406	39/18723	1.81e-05	0.000365023	0.000266656	AURKB/BUB1B/BUB1/NDC80/TRIP13/CCNB1/CENPF	7
BP	GO:0042542	response to hydrogen peroxide	13/406	146/18723	1.81e-05	0.000365023	0.000266656	ECT2/COL1A1/SOD2/MET/CYP1B1/FOSL1/NR4A3/SDC1/STAT1/ANXA1/CDK1/AQP1/PDGFD	13
BP	GO:0044403	biological process involved in symbiotic interaction	19/406	290/18723	2.04e-05	0.000409916	0.000299451	F2RL1/CXCL8/CAV1/CAV2/EGFR/ITGA5/FN1/LTF/APOL1/CD74/ITGA2/CCL5/PLSCR1/SIGLEC1/PTX3/CDK1/HLA-DRB1/CIITA/ICAM1	19
BP	GO:0007229	integrin-mediated signaling pathway	11/406	107/18723	2.09e-05	0.000414081	0.000302493	ADAMTS1/TIMP1/ITGA5/COL3A1/SLC2A10/FN1/ITGA2/FYB1/FLNA/ISG15/ITGA3	11
BP	GO:0010212	response to ionizing radiation	13/406	148/18723	2.1e-05	0.000414081	0.000302493	THBD/HAMP/ECT2/PTPRC/VCAM1/RAD51AP1/CXCL10/GADD45A/ANXA1/SFRP2/EGR1/NAMPT/ICAM1	13
BP	GO:0044839	cell cycle G2/M phase transition	13/406	148/18723	2.1e-05	0.000414081	0.000302493	WEE1/AURKB/CDK2/CCNA2/MELK/DTL/FOXM1/AURKA/CCNB2/CDK1/USH1C/CCNB1/CENPF	13
BP	GO:0060485	mesenchyme development	19/406	291/18723	2.14e-05	0.000421216	0.000307706	COL1A1/JAG1/S100A4/FAM83D/VASN/HOXA5/FN1/LOXL2/ACTA2/TGFB2/HAS2/RDH10/SPRY1/STAT1/CRB2/PDPN/SFRP2/FLNA/FOLR1	19
BP	GO:0045841	negative regulation of mitotic metaphase/anaphase transition	7/406	40/18723	2.15e-05	0.000421216	0.000307706	AURKB/BUB1B/BUB1/NDC80/TRIP13/CCNB1/CENPF	7
BP	GO:0070374	positive regulation of ERK1 and ERK2 cascade	16/406	217/18723	2.2e-05	0.000429541	0.000313787	F2RL1/CHI3L1/NPNT/PTPRC/CCL2/EGFR/C5AR1/PLA2G5/CD74/CCL5/ANGPT1/HLA-DRB1/PLA2G2A/ICAM1/PDGFD/CD44	16
BP	GO:0017015	regulation of transforming growth factor beta receptor signaling pathway	12/406	128/18723	2.27e-05	0.00043926	0.000320887	CAV1/NPNT/CAV2/LATS2/LTBP1/VASN/SLC2A10/THBS1/CD109/SPRY1/FOLR1/ITGA3	12
BP	GO:1901654	response to ketone	15/406	194/18723	2.28e-05	0.000439759	0.000321252	CAV1/SERPINF1/EGFR/SPP1/POSTN/AHR/FOSL1/TYMS/THBS1/TGFB2/TRH/MSN/AQP1/ICAM1/TNC	15
BP	GO:0009314	response to radiation	25/406	456/18723	2.3e-05	0.000441053	0.000322197	THBD/HAMP/ECT2/PTPRC/PBK/SOD2/VCAM1/AURKB/EGFR/TIMP1/RAD51AP1/COL3A1/ANGPT2/DTL/PCLAF/CXCL10/MMP9/GADD45A/MFAP4/ANXA1/SFRP2/EGR1/NAMPT/AQP1/ICAM1	25
BP	GO:0007346	regulation of mitotic cell cycle	25/406	457/18723	2.38e-05	0.000455276	0.000332587	WEE1/GTSE1/MKI67/UBE2C/CAV2/ADAMTS1/IQGAP1/CCL2/AURKB/EGFR/NEK2/CDK2/DTL/BUB1B/BUB1/CCDC8/NDC80/AURKA/ANXA1/NUSAP1/CDK1/GAS1/TRIP13/CCNB1/CENPF	25
BP	GO:0043903	regulation of biological process involved in symbiotic interaction	9/406	72/18723	2.47e-05	0.00047003	0.000343365	F2RL1/CXCL8/CAV1/CAV2/LTF/CD74/PTX3/HLA-DRB1/CIITA	9
BP	GO:0002253	activation of immune response	22/406	375/18723	2.58e-05	0.000488248	0.000356674	C3/PTPRC/HLA-DQB1/CD22/CFI/C7/C5AR1/C2/C1RL/FPR1/C1R/NR4A3/PLSCR1/HLA-DPB1/MFAP4/GBP1/FYB1/CFH/HLA-DRB1/FPR3/C1S/SERPING1	22
BP	GO:0051784	negative regulation of nuclear division	8/406	56/18723	2.61e-05	0.000491758	0.000359238	AURKB/LIF/BUB1B/BUB1/NDC80/TRIP13/CCNB1/CENPF	8
BP	GO:0002698	negative regulation of immune effector process	11/406	110/18723	2.71e-05	0.000509302	0.000372054	PTPRC/IL13RA2/CD22/AHR/FOXJ1/TGFB2/ANGPT1/SLAMF8/ANXA1/FGL2/SERPING1	11
BP	GO:1903844	regulation of cellular response to transforming growth factor beta stimulus	12/406	131/18723	2.86e-05	0.000533974	0.000390077	CAV1/NPNT/CAV2/LATS2/LTBP1/VASN/SLC2A10/THBS1/CD109/SPRY1/FOLR1/ITGA3	12
BP	GO:0000302	response to reactive oxygen species	16/406	222/18723	2.91e-05	0.000540141	0.000394582	ECT2/COL1A1/FBLN5/SOD2/EGFR/MET/CYP1B1/FOSL1/NR4A3/SDC1/MMP9/STAT1/ANXA1/CDK1/AQP1/PDGFD	16
BP	GO:0052126	movement in host environment	14/406	175/18723	2.92e-05	0.000540141	0.000394582	CXCL8/CAV1/CAV2/EGFR/ITGA5/CD74/ITGA2/PLSCR1/SIGLEC1/PTX3/CDK1/HLA-DRB1/CIITA/ICAM1	14
BP	GO:1902100	negative regulation of metaphase/anaphase transition of cell cycle	7/406	42/18723	3e-05	0.000552969	0.000403954	AURKB/BUB1B/BUB1/NDC80/TRIP13/CCNB1/CENPF	7
BP	GO:0001503	ossification	23/406	408/18723	3.17e-05	0.000580076	0.000423756	COL5A2/COL1A1/NPNT/JAG1/MRC2/EGFR/COL1A2/SPP1/CCN1/LTF/TGFB2/CDK6/DKK1/MMP9/CLIC1/RUNX1/SFRP2/MMP14/IBSP/CTHRC1/MGP/ISG15/TNC	23
BP	GO:0002544	chronic inflammatory response	5/406	18/18723	3.17e-05	0.000580076	0.000423756	VCAM1/S100A8/THBS1/CCL5/S100A9	5
BP	GO:0050678	regulation of epithelial cell proliferation	22/406	381/18723	3.28e-05	0.000596195	0.000435531	F3/LAMC1/CAV1/CAV2/SERPINF1/THBS4/CCL2/EGFR/VEGFA/HOXA5/C5AR1/SULF1/THBS1/TGFB2/HAS2/NR4A3/CD109/CDK6/STAT1/SFRP2/IQGAP3/LAMB1	22
BP	GO:0002690	positive regulation of leukocyte chemotaxis	10/406	94/18723	3.68e-05	0.000665816	0.00048639	F2RL1/CXCL8/THBS4/VEGFA/C5AR1/CD74/THBS1/CXCL10/CCL5/SERPINE1	10
BP	GO:0045786	negative regulation of cell cycle	22/406	385/18723	3.83e-05	0.000691457	0.000505122	WEE1/GTSE1/LATS2/CCL2/AURKB/EGFR/NEK2/CDK2/CDC45/LIF/DTL/BUB1B/BUB1/CDK6/CDKN2C/NDC80/PTTG1/CDK1/GAS1/TRIP13/CCNB1/CENPF	22
BP	GO:0001837	epithelial to mesenchymal transition	13/406	157/18723	3.91e-05	0.000701924	0.000512768	COL1A1/JAG1/S100A4/FAM83D/VASN/LOXL2/TGFB2/HAS2/SPRY1/CRB2/PDPN/SFRP2/FLNA	13
BP	GO:0050764	regulation of phagocytosis	10/406	95/18723	4.03e-05	0.000720474	0.000526319	F2RL1/C3/PTPRC/CCL2/PLA2G5/C2/ITGA2/PLSCR1/PTX3/SLC11A1	10
BP	GO:0071900	regulation of protein serine/threonine kinase activity	21/406	359/18723	4.1e-05	0.000728784	0.00053239	CAV1/LATS2/IQGAP1/EGFR/SPRY4/VEGFA/CCNA2/LTF/TCIM/THBS1/DIRAS3/CDKN2C/DKK1/CCNB2/CDKN3/GADD45A/SPRY1/PKIB/SFRP2/PDGFD/CCNB1	21
BP	GO:0045766	positive regulation of angiogenesis	14/406	181/18723	4.23e-05	0.000747144	0.000545802	C3/CXCL8/CHI3L1/F3/VEGFA/ITGA5/ANGPT2/CYP1B1/C5AR1/THBS1/SERPINE1/RUNX1/SFRP2/AQP1	14
BP	GO:1904018	positive regulation of vasculature development	14/406	181/18723	4.23e-05	0.000747144	0.000545802	C3/CXCL8/CHI3L1/F3/VEGFA/ITGA5/ANGPT2/CYP1B1/C5AR1/THBS1/SERPINE1/RUNX1/SFRP2/AQP1	14
BP	GO:0030071	regulation of mitotic metaphase/anaphase transition	8/406	60/18723	4.36e-05	0.000761916	0.000556593	UBE2C/AURKB/BUB1B/BUB1/NDC80/TRIP13/CCNB1/CENPF	8
BP	GO:0031638	zymogen activation	8/406	60/18723	4.36e-05	0.000761916	0.000556593	THBS1/C1RL/C1R/SERPINE1/PLAT/PLAU/RUNX1/MMP14	8
BP	GO:0000086	G2/M transition of mitotic cell cycle	12/406	137/18723	4.46e-05	0.000776262	0.000567073	WEE1/AURKB/CDK2/CCNA2/MELK/DTL/FOXM1/AURKA/CDK1/USH1C/CCNB1/CENPF	12
BP	GO:0051251	positive regulation of lymphocyte activation	21/406	362/18723	4.62e-05	0.000801226	0.00058531	CLCF1/CAV1/PTPRC/HLA-DPA1/CCL2/VCAM1/HLA-DQB1/HLA-DOA/HLA-DQA2/HLA-DRA/CD74/CCL5/HLA-DPB1/ANXA1/RUNX1/HLA-DRB5/IGFBP2/MMP14/HLA-DRB1/HLA-DQB2/HLA-DQA1	21
BP	GO:0043154	negative regulation of cysteine-type endopeptidase activity involved in apoptotic process	9/406	78/18723	4.72e-05	0.000815226	0.000595537	IFI6/PLAUR/VEGFA/THBS1/MMP9/SFRP2/AQP1/BIRC5/CD44	9
BP	GO:0002237	response to molecule of bacterial origin	21/406	363/18723	4.81e-05	0.000826778	0.000603976	CMPK2/THBD/CXCL8/HAMP/GNG12/SOD2/CCL2/VCAM1/TFPI/S100A8/C5AR1/LTF/TLR1/CXCL10/CCL5/CXCL1/SERPINE1/S100A9/VIM/SLC11A1/ICAM1	21
BP	GO:0002577	regulation of antigen processing and presentation	5/406	20/18723	5.54e-05	0.000949462	0.000693599	HLA-DOA/CD74/THBS1/FGL2/SLC11A1	5
BP	GO:1903706	regulation of hemopoiesis	21/406	367/18723	5.63e-05	0.000959794	0.000701146	PTPRC/JAG1/HLA-DOA/HOXA5/SCIN/HLA-DRA/LIF/FOXJ1/LTF/CD74/IRF1/CDK6/SLAMF8/STAT1/ANXA1/RUNX1/MMP14/HLA-DRB1/CARTPT/FGL2/ISG15	21
BP	GO:0048608	reproductive structure development	23/406	424/18723	5.72e-05	0.00097241	0.000710363	C3/SOCS3/SERPINF1/ADAMTS1/SPP1/ADAM19/VEGFA/CCN1/ST14/LIF/FOSL1/SULF1/TGFB2/SDC1/RDH10/PLK4/ANXA1/PTX3/SFRP2/MMP14/FLNA/ICAM1/TNC	23
BP	GO:0048145	regulation of fibroblast proliferation	9/406	80/18723	5.78e-05	0.000977387	0.000713998	ANXA2/CCNA2/FOSL2/FN1/CD74/CDK6/AQP1/PDGFD/CCNB1	9
BP	GO:0090068	positive regulation of cell cycle process	16/406	236/18723	6.09e-05	0.00102619	0.000749647	ECT2/UBE2C/ADAMTS1/FAM83D/AURKB/EGFR/RAD51AP1/DTL/NDC80/AURKA/PLSCR1/PLK4/ANXA1/NUSAP1/CDK1/CCNB1	16
BP	GO:1902099	regulation of metaphase/anaphase transition of cell cycle	8/406	63/18723	6.23e-05	0.00104535	0.000763644	UBE2C/AURKB/BUB1B/BUB1/NDC80/TRIP13/CCNB1/CENPF	8
BP	GO:0035850	epithelial cell differentiation involved in kidney development	7/406	47/18723	6.37e-05	0.00104861	0.000766032	JAG1/IQGAP1/LIF/FOXJ1/ACTA2/MMP9/STAT1	7
BP	GO:0061458	reproductive system development	23/406	427/18723	6.37e-05	0.00104861	0.000766032	C3/SOCS3/SERPINF1/ADAMTS1/SPP1/ADAM19/VEGFA/CCN1/ST14/LIF/FOSL1/SULF1/TGFB2/SDC1/RDH10/PLK4/ANXA1/PTX3/SFRP2/MMP14/FLNA/ICAM1/TNC	23
BP	GO:0002604	regulation of dendritic cell antigen processing and presentation	4/406	11/18723	6.37e-05	0.00104861	0.000766032	CD74/THBS1/FGL2/SLC11A1	4
BP	GO:0048144	fibroblast proliferation	9/406	81/18723	6.38e-05	0.00104861	0.000766032	ANXA2/CCNA2/FOSL2/FN1/CD74/CDK6/AQP1/PDGFD/CCNB1	9
BP	GO:0048708	astrocyte differentiation	9/406	81/18723	6.38e-05	0.00104861	0.000766032	CLCF1/EGFR/S100A8/LIF/C5AR1/CDK6/S100A9/VIM/MAG	9
BP	GO:0032496	response to lipopolysaccharide	20/406	343/18723	6.51e-05	0.00106546	0.000778335	CMPK2/THBD/CXCL8/HAMP/GNG12/SOD2/CCL2/VCAM1/TFPI/S100A8/C5AR1/LTF/CXCL10/CCL5/CXCL1/SERPINE1/S100A9/VIM/SLC11A1/ICAM1	20
BP	GO:0010038	response to metal ion	21/406	373/18723	7.09e-05	0.00115684	0.000845093	HAMP/ECT2/CAV1/SERPINF1/SOD2/IQGAP1/VCAM1/EGFR/CNGA3/S100A8/ALOX5AP/LOXL2/THBS1/SDC1/MMP9/PLSCR1/IGFBP2/CDK1/AQP1/ICAM1/CCNB1	21
BP	GO:0030261	chromosome condensation	7/406	48/18723	7.32e-05	0.00118016	0.000862132	SMC4/TOP2A/NCAPG/NCAPH/NUSAP1/CDK1/CCNB1	7
BP	GO:0033628	regulation of cell adhesion mediated by integrin	7/406	48/18723	7.32e-05	0.00118016	0.000862132	CYP1B1/LIF/CCL5/TGFB2/SERPINE1/PLAU/SFRP2	7
BP	GO:0045839	negative regulation of mitotic nuclear division	7/406	48/18723	7.32e-05	0.00118016	0.000862132	AURKB/BUB1B/BUB1/NDC80/TRIP13/CCNB1/CENPF	7
BP	GO:0010811	positive regulation of cell-substrate adhesion	11/406	123/18723	7.63e-05	0.00122528	0.000895087	NDNF/NPNT/IQGAP1/VEGFA/CCN1/FN1/HAS2/CDK6/FLNA/ECM2/ITGA3	11
BP	GO:0071496	cellular response to external stimulus	19/406	320/18723	7.77e-05	0.00124302	0.000908049	COL1A1/PTPRC/DAPL1/VCAM1/EGFR/POSTN/FOSL1/ATF3/ITGA2/IRF1/GADD45A/SFRP2/NAMPT/CARTPT/FOLR1/AQP1/MAG/ICAM1/TNC	19
BP	GO:0044843	cell cycle G1/S phase transition	16/406	241/18723	7.81e-05	0.00124401	0.000908769	WEE1/GTSE1/BCAT1/LATS2/ADAMTS1/FAM83D/CCL2/EGFR/CDK2/CCNA2/TCIM/CDK6/CDKN2C/CDKN3/ANXA1/IQGAP3	16
BP	GO:0044319	wound healing, spreading of cells	6/406	34/18723	8.06e-05	0.00127371	0.000930465	ITGA5/CCN1/COL5A1/PDPN/FLNA/CD44	6
BP	GO:0090505	epiboly involved in wound healing	6/406	34/18723	8.06e-05	0.00127371	0.000930465	ITGA5/CCN1/COL5A1/PDPN/FLNA/CD44	6
BP	GO:0030857	negative regulation of epithelial cell differentiation	7/406	49/18723	8.38e-05	0.0013204	0.000964575	CAV1/JAG1/VEGFA/S1PR3/MMP9/SPRY1/STAT1	7
BP	GO:0050731	positive regulation of peptidyl-tyrosine phosphorylation	14/406	193/18723	8.5e-05	0.00133413	0.000974607	CLCF1/PTPRC/IQGAP1/THBS4/VEGFA/ITGA5/LIF/PARP9/CD74/CCL5/ANGPT1/CRLF1/ICAM1/CD44	14
BP	GO:0048661	positive regulation of smooth muscle cell proliferation	10/406	104/18723	8.76e-05	0.0013694	0.00100037	ADAMTS1/EGFR/THBS1/ITGA2/CCL5/NR4A3/MMP9/STAT1/NAMPT/PDGFD	10
BP	GO:0033674	positive regulation of kinase activity	24/406	467/18723	9.2e-05	0.0014332	0.00104698	CHI3L1/ECT2/PTPRC/PIFO/IQGAP1/EGFR/VEGFA/MET/CCN1/LTF/TCIM/CD74/THBS1/CCL5/TGFB2/DKK1/ANGPT1/TPX2/EGR1/HLA-DRB1/CARTPT/SLC11A1/PDGFD/CCNB1	24
BP	GO:0018149	peptide cross-linking	6/406	35/18723	9.55e-05	0.00147317	0.00107618	NDNF/COL3A1/F13A1/FN1/THBS1/ANXA1	6
BP	GO:0090504	epiboly	6/406	35/18723	9.55e-05	0.00147317	0.00107618	ITGA5/CCN1/COL5A1/PDPN/FLNA/CD44	6
BP	GO:0007080	mitotic metaphase plate congression	7/406	50/18723	9.57e-05	0.00147317	0.00107618	CDCA8/KIF2C/AURKB/KIFC1/NUF2/NDC80/CCNB1	7
BP	GO:1901990	regulation of mitotic cell cycle phase transition	18/406	299/18723	0.00010028	0.00153824	0.00112371	WEE1/GTSE1/UBE2C/ADAMTS1/CCL2/AURKB/EGFR/CDK2/DTL/BUB1B/BUB1/NDC80/AURKA/ANXA1/CDK1/TRIP13/CCNB1/CENPF	18
BP	GO:2001251	negative regulation of chromosome organization	9/406	86/18723	0.000102201	0.00156189	0.00114099	TOP2A/AURKB/BUB1B/BUB1/NDC80/PTTG1/TRIP13/CCNB1/CENPF	9
BP	GO:0042116	macrophage activation	10/406	106/18723	0.000102894	0.00156665	0.00114447	HAMP/PTPRC/CTSC/C5AR1/CD74/THBS1/TLR1/NAMPT/SLC11A1/CD93	10
BP	GO:0032964	collagen biosynthetic process	7/406	51/18723	0.000108857	0.00165133	0.00120633	COL1A1/SERPINH1/ITGA2/COL5A1/RUNX1/VIM/CIITA	7
BP	GO:0007093	mitotic cell cycle checkpoint signaling	11/406	129/18723	0.000117322	0.0017732	0.00129535	GTSE1/AURKB/CDK2/DTL/BUB1B/BUB1/NDC80/CDK1/TRIP13/CCNB1/CENPF	11
BP	GO:0048771	tissue remodeling	13/406	175/18723	0.000119168	0.00179451	0.00131092	HAMP/CAV1/JAG1/THBS4/EGFR/TIMP1/SPP1/LIF/RUNX1/MMP14/FLNA/CARTPT/CTHRC1	13
BP	GO:0010001	glial cell differentiation	15/406	225/18723	0.000124021	0.00186077	0.00135932	OPALIN/CLCF1/FA2H/LAMA2/EGFR/S100A8/LIF/C5AR1/CDK6/CDKN2C/S100A9/CDK1/VIM/NKX6-2/MAG	15
BP	GO:1901987	regulation of cell cycle phase transition	21/406	390/18723	0.000132493	0.00198066	0.0014469	WEE1/GTSE1/UBE2C/ADAMTS1/FAM83D/CCL2/AURKB/EGFR/CDK2/CDC45/TCIM/DTL/BUB1B/BUB1/NDC80/AURKA/ANXA1/CDK1/TRIP13/CCNB1/CENPF	21
BP	GO:0051988	regulation of attachment of spindle microtubules to kinetochore	4/406	13/18723	0.000133372	0.00198656	0.00145122	ECT2/AURKB/NEK2/CCNB1	4
BP	GO:0030856	regulation of epithelial cell differentiation	12/406	154/18723	0.000137991	0.00204794	0.00149606	CAV1/JAG1/VEGFA/LIF/FOXJ1/SFRP4/S1PR3/CD109/MMP9/SERPINE1/SPRY1/STAT1	12
BP	GO:0031639	plasminogen activation	5/406	24/18723	0.000141478	0.00209215	0.00152835	THBS1/SERPINE1/PLAT/PLAU/RUNX1	5
BP	GO:0051701	biological process involved in interaction with host	14/406	203/18723	0.000145376	0.00213595	0.00156035	CXCL8/CAV1/CAV2/EGFR/ITGA5/CD74/ITGA2/PLSCR1/SIGLEC1/PTX3/CDK1/HLA-DRB1/CIITA/ICAM1	14
BP	GO:0006909	phagocytosis	18/406	308/18723	0.000145479	0.00213595	0.00156035	F2RL1/C3/PTPRC/MSR1/CCL2/CD302/MET/PLA2G5/C2/THBS1/ITGA2/COLEC12/PLSCR1/ANXA1/PTX3/RAB34/SLC11A1/CD93	18
BP	GO:0034614	cellular response to reactive oxygen species	12/406	155/18723	0.000146702	0.00214624	0.00156786	ECT2/FBLN5/SOD2/EGFR/MET/CYP1B1/NR4A3/MMP9/ANXA1/CDK1/AQP1/PDGFD	12
BP	GO:1901991	negative regulation of mitotic cell cycle phase transition	13/406	179/18723	0.000149457	0.00217878	0.00159164	WEE1/GTSE1/CCL2/AURKB/CDK2/DTL/BUB1B/BUB1/NDC80/CDK1/TRIP13/CCNB1/CENPF	13
BP	GO:0048246	macrophage chemotaxis	6/406	38/18723	0.000153692	0.0022326	0.00163096	CCL2/C5AR1/SAA1/THBS1/CCL5/SLAMF8	6
BP	GO:0035051	cardiocyte differentiation	12/406	156/18723	0.00015588	0.00225642	0.00164835	HAMP/JAG1/VCAM1/EGFR/VEGFA/TGFB2/DKK1/SPRY1/CDK1/ALPK3/FOLR1/CCNB1	12
BP	GO:0048660	regulation of smooth muscle cell proliferation	13/406	180/18723	0.000157989	0.00227893	0.0016648	ADAMTS1/SOD2/IGFBP3/EGFR/THBS1/ITGA2/CCL5/NR4A3/OGN/MMP9/STAT1/NAMPT/PDGFD	13
BP	GO:0050927	positive regulation of positive chemotaxis	5/406	25/18723	0.00017372	0.00248837	0.0018178	F2RL1/CXCL8/F3/VEGFA/ITGA2	5
BP	GO:0072012	glomerulus vasculature development	5/406	25/18723	0.00017372	0.00248837	0.0018178	ANGPT2/ACTA2/ANGPT1/EGR1/PDGFD	5
BP	GO:0061138	morphogenesis of a branching epithelium	13/406	182/18723	0.000176319	0.00251683	0.00183859	SOCS3/NPNT/VEGFA/MET/HOXA5/ST14/SULF1/RDH10/COL4A1/SPRY1/SFRP2/MMP14/TNC	13
BP	GO:1905517	macrophage migration	7/406	55/18723	0.000177129	0.00251801	0.00183945	CCL2/C5AR1/SAA1/THBS1/CCL5/SLAMF8/MMP14	7
BP	GO:0045787	positive regulation of cell cycle	18/406	313/18723	0.000177626	0.00251801	0.00183945	ECT2/UBE2C/ADAMTS1/FAM83D/AURKB/EGFR/RAD51AP1/FOSL1/DTL/TGFB2/NDC80/AURKA/PLSCR1/PLK4/ANXA1/NUSAP1/CDK1/CCNB1	18
BP	GO:0016572	histone phosphorylation	6/406	39/18723	0.000178347	0.00251954	0.00184057	AURKB/CDK2/CCNA2/AURKA/CDK1/CCNB1	6
BP	GO:0003158	endothelium development	11/406	136/18723	0.000187638	0.00264171	0.00192981	F2RL1/HAPLN2/JAG1/VEGFA/MET/S1PR3/CXCL10/FSTL1/PDPN/MSN/ICAM1	11
BP	GO:0048659	smooth muscle cell proliferation	13/406	184/18723	0.000196446	0.00275628	0.00201351	ADAMTS1/SOD2/IGFBP3/EGFR/THBS1/ITGA2/CCL5/NR4A3/OGN/MMP9/STAT1/NAMPT/PDGFD	13
BP	GO:0045930	negative regulation of mitotic cell cycle	15/406	235/18723	0.000199899	0.00279519	0.00204193	WEE1/GTSE1/CCL2/AURKB/EGFR/CDK2/DTL/BUB1B/BUB1/NDC80/CDK1/GAS1/TRIP13/CCNB1/CENPF	15
BP	GO:0000079	regulation of cyclin-dependent protein serine/threonine kinase activity	9/406	94/18723	0.000203058	0.00282974	0.00206717	LATS2/EGFR/CCNA2/DIRAS3/CDKN2C/CCNB2/CDKN3/GADD45A/CCNB1	9
BP	GO:0140013	meiotic nuclear division	13/406	185/18723	0.000207228	0.00287809	0.00210249	SMC4/TOP2A/SGO2/RAD51AP1/NUF2/LIF/BUB1B/BUB1/PTTG1/AURKA/CCNB2/CDC20/TRIP13	13
BP	GO:0071478	cellular response to radiation	13/406	186/18723	0.000218513	0.00302461	0.00220953	HAMP/ECT2/PBK/AURKB/TIMP1/RAD51AP1/MMP9/GADD45A/MFAP4/SFRP2/EGR1/NAMPT/AQP1	13
BP	GO:0002011	morphogenesis of an epithelial sheet	7/406	57/18723	0.00022236	0.00305726	0.00223339	JAG1/ITGA5/CCN1/COL5A1/PDPN/FLNA/CD44	7
BP	GO:0061005	cell differentiation involved in kidney development	7/406	57/18723	0.00022236	0.00305726	0.00223339	JAG1/IQGAP1/LIF/FOXJ1/ACTA2/MMP9/STAT1	7
BP	GO:0033044	regulation of chromosome organization	13/406	187/18723	0.000230321	0.00315617	0.00230564	TOP2A/UBE2C/AURKB/NEK2/TACC3/BUB1B/BUB1/NDC80/PTTG1/PKIB/TRIP13/CCNB1/CENPF	13
BP	GO:0048732	gland development	22/406	436/18723	0.000231909	0.00316737	0.00231382	HAMP/FA2H/CAV1/SERPINF1/HOXD9/EGFR/VEGFA/MET/HOXA5/OAS2/SULF1/TYMS/ITGA2/TGFB2/AURKA/CCNB2/CCKBR/ANXA1/SOCS2/IQGAP3/MSN/TNC	22
BP	GO:1902622	regulation of neutrophil migration	6/406	41/18723	0.000236976	0.00322586	0.00235654	CXCL8/THBS4/C5AR1/CD74/SLAMF8/IL1R1	6
BP	GO:1901655	cellular response to ketone	9/406	96/18723	0.000238292	0.00323306	0.00236181	SERPINF1/EGFR/SPP1/POSTN/AHR/MSN/AQP1/ICAM1/TNC	9
BP	GO:0051315	attachment of mitotic spindle microtubules to kinetochore	4/406	15/18723	0.000246002	0.00332669	0.00243021	KIF2C/AURKB/NUF2/NDC80	4
BP	GO:0034340	response to type I interferon	7/406	58/18723	0.000248229	0.00334581	0.00244417	OAS2/MX1/SP100/OAS3/STAT1/OAS1/ISG15	7
BP	GO:0045446	endothelial cell differentiation	10/406	118/18723	0.000250192	0.00335394	0.00245011	F2RL1/HAPLN2/JAG1/VEGFA/MET/S1PR3/FSTL1/PDPN/MSN/ICAM1	10
BP	GO:0010948	negative regulation of cell cycle process	17/406	294/18723	0.000250464	0.00335394	0.00245011	WEE1/GTSE1/CCL2/AURKB/NEK2/CDK2/CDC45/LIF/DTL/BUB1B/BUB1/NDC80/PTTG1/CDK1/TRIP13/CCNB1/CENPF	17
BP	GO:0007263	nitric oxide mediated signal transduction	5/406	27/18723	0.000254717	0.00337787	0.0024676	NDNF/EGFR/VEGFA/THBS1/FPR1	5
BP	GO:0061437	renal system vasculature development	5/406	27/18723	0.000254717	0.00337787	0.0024676	ANGPT2/ACTA2/ANGPT1/EGR1/PDGFD	5
BP	GO:0061440	kidney vasculature development	5/406	27/18723	0.000254717	0.00337787	0.0024676	ANGPT2/ACTA2/ANGPT1/EGR1/PDGFD	5
BP	GO:2000351	regulation of endothelial cell apoptotic process	7/406	59/18723	0.000276467	0.00364634	0.00266372	NDNF/CCL2/THBS1/CD248/SERPINE1/ANGPT1/ICAM1	7
BP	GO:0002377	immunoglobulin production	14/406	216/18723	0.000276735	0.00364634	0.00266372	CLCF1/PTPRC/HLA-DPA1/HLA-DQB1/HLA-DOA/IL13RA2/HLA-DQA2/CD22/HLA-DRA/HLA-DPB1/HLA-DRB5/HLA-DRB1/HLA-DQB2/HLA-DQA1	14
BP	GO:1904029	regulation of cyclin-dependent protein kinase activity	9/406	98/18723	0.000278454	0.00365726	0.00267169	LATS2/EGFR/CCNA2/DIRAS3/CDKN2C/CCNB2/CDKN3/GADD45A/CCNB1	9
BP	GO:0031960	response to corticosteroid	12/406	167/18723	0.00029389	0.00384771	0.00281082	COL1A1/SERPINF1/EGFR/CNGA3/FOSL1/TYMS/SDC1/ANXA1/IGFBP2/TRH/AQP1/ICAM1	12
BP	GO:0006898	receptor-mediated endocytosis	15/406	244/18723	0.000299702	0.00390992	0.00285627	C3/CXCL8/CAV1/CAV2/MSR1/ANXA2/VEGFA/SFRP4/DKK1/SERPINE1/ANGPT1/SIGLEC1/HSPG2/ARC/FOLR1	15
BP	GO:0010717	regulation of epithelial to mesenchymal transition	9/406	99/18723	0.000300544	0.00390992	0.00285627	COL1A1/JAG1/VASN/LOXL2/TGFB2/SPRY1/CRB2/PDPN/SFRP2	9
BP	GO:0001667	ameboidal-type cell migration	23/406	475/18723	0.000303528	0.00392561	0.00286773	SERPINF1/TIMP1/VEGFA/MET/ANGPT2/CYP1B1/FN1/LOXL2/THBS1/ITGA2/TGFB2/HAS2/SP100/FSTL1/MMP9/ANGPT1/PDLIM1/GADD45A/CRB2/ANXA1/FOLR1/ITGA3/SRPX2	23
BP	GO:0034123	positive regulation of toll-like receptor signaling pathway	5/406	28/18723	0.000304614	0.00392561	0.00286773	F2RL1/CAV1/LTF/RSAD2/TLR1	5
BP	GO:1902624	positive regulation of neutrophil migration	5/406	28/18723	0.000304614	0.00392561	0.00286773	CXCL8/THBS4/C5AR1/CD74/IL1R1	5
BP	GO:2001233	regulation of apoptotic signaling pathway	19/406	356/18723	0.000306313	0.00392807	0.00286952	CAV1/PTPRC/IFI6/SOD2/PLAUR/G0S2/S100A8/CTSC/TNFRSF12A/CD74/ATF3/THBS1/SP100/MMP9/SERPINE1/S100A9/SFRP2/ICAM1/CD44	19
BP	GO:0002455	humoral immune response mediated by circulating immunoglobulin	10/406	121/18723	0.000306716	0.00392807	0.00286952	C3/PTPRC/CFI/C7/FOXJ1/C2/C1RL/C1R/C1S/SERPING1	10
BP	GO:0014002	astrocyte development	6/406	43/18723	0.000309793	0.00395515	0.00288931	EGFR/S100A8/C5AR1/CDK6/S100A9/VIM	6
BP	GO:0045860	positive regulation of protein kinase activity	20/406	386/18723	0.000314826	0.00400697	0.00292716	CHI3L1/ECT2/PTPRC/IQGAP1/EGFR/VEGFA/CCN1/LTF/TCIM/THBS1/CCL5/TGFB2/DKK1/ANGPT1/TPX2/EGR1/CARTPT/SLC11A1/PDGFD/CCNB1	20
BP	GO:0034138	toll-like receptor 3 signaling pathway	4/406	16/18723	0.000322411	0.00409084	0.00298843	F2RL1/CAV1/COLEC12/OAS1	4
BP	GO:0000075	cell cycle checkpoint signaling	12/406	169/18723	0.000327768	0.00414602	0.00302874	GTSE1/AURKB/CDK2/CDC45/DTL/BUB1B/BUB1/NDC80/CDK1/TRIP13/CCNB1/CENPF	12
BP	GO:0050777	negative regulation of immune response	13/406	194/18723	0.000329326	0.00415294	0.00303379	PTPRC/IL13RA2/COL3A1/AHR/FOXJ1/OAS3/SLAMF8/ANXA1/HLA-DRB1/OAS1/FGL2/SERPING1/ISG15	13
BP	GO:0071214	cellular response to abiotic stimulus	18/406	331/18723	0.000350558	0.00439374	0.0032097	HAMP/ECT2/COL1A1/PBK/AURKB/EGFR/TIMP1/RAD51AP1/ITGA2/IRF1/MMP9/GADD45A/MFAP4/SFRP2/EGR1/NAMPT/AQP1/MAG	18
BP	GO:0104004	cellular response to environmental stimulus	18/406	331/18723	0.000350558	0.00439374	0.0032097	HAMP/ECT2/COL1A1/PBK/AURKB/EGFR/TIMP1/RAD51AP1/ITGA2/IRF1/MMP9/GADD45A/MFAP4/SFRP2/EGR1/NAMPT/AQP1/MAG	18
BP	GO:0001763	morphogenesis of a branching structure	13/406	196/18723	0.000363528	0.00454244	0.00331833	SOCS3/NPNT/VEGFA/MET/HOXA5/ST14/SULF1/RDH10/COL4A1/SPRY1/SFRP2/MMP14/TNC	13
BP	GO:0032677	regulation of interleukin-8 production	9/406	102/18723	0.000375676	0.00466588	0.00340851	F2RL1/CHI3L1/F3/PTPRC/CD74/TLR1/SERPINE1/ANXA1/CD58	9
BP	GO:1902106	negative regulation of leukocyte differentiation	9/406	102/18723	0.000375676	0.00466588	0.00340851	FOXJ1/LTF/CD74/IRF1/CDK6/ANXA1/RUNX1/CARTPT/FGL2	9
BP	GO:0032757	positive regulation of interleukin-8 production	7/406	62/18723	0.000376983	0.00466801	0.00341006	F2RL1/CHI3L1/F3/CD74/TLR1/SERPINE1/CD58	7
BP	GO:0085029	extracellular matrix assembly	6/406	45/18723	0.000399075	0.00492672	0.00359905	HAPLN2/FBLN5/COL1A2/HAS2/MFAP4/LAMB1	6
BP	GO:0032637	interleukin-8 production	9/406	103/18723	0.000403917	0.00494198	0.0036102	F2RL1/CHI3L1/F3/PTPRC/CD74/TLR1/SERPINE1/ANXA1/CD58	9
BP	GO:0045639	positive regulation of myeloid cell differentiation	9/406	103/18723	0.000403917	0.00494198	0.0036102	JAG1/HOXA5/SCIN/LIF/CD74/STAT1/RUNX1/HLA-DRB1/ISG15	9
BP	GO:0046425	regulation of receptor signaling pathway via JAK-STAT	9/406	103/18723	0.000403917	0.00494198	0.0036102	SOCS3/CAV1/PTPRC/OCIAD2/CYP1B1/LIF/CCL5/GADD45A/SOCS2	9
BP	GO:1902105	regulation of leukocyte differentiation	16/406	279/18723	0.000413982	0.00502574	0.0036714	PTPRC/HLA-DOA/HLA-DRA/LIF/FOXJ1/LTF/CD74/IRF1/CDK6/SLAMF8/ANXA1/RUNX1/MMP14/HLA-DRB1/CARTPT/FGL2	16
BP	GO:0007076	mitotic chromosome condensation	4/406	17/18723	0.000414431	0.00502574	0.0036714	SMC4/NCAPG/NCAPH/NUSAP1	4
BP	GO:0038065	collagen-activated signaling pathway	4/406	17/18723	0.000414431	0.00502574	0.0036714	COL1A1/COL4A2/ITGA2/COL4A1	4
BP	GO:0090130	tissue migration	19/406	365/18723	0.000417354	0.0050462	0.00368634	SERPINF1/VEGFA/MET/ANGPT2/CYP1B1/LOXL2/ACTA2/THBS1/ITGA2/TGFB2/HAS2/SP100/FSTL1/MMP9/ANGPT1/GADD45A/ANXA1/ITGA3/SRPX2	19
BP	GO:0050670	regulation of lymphocyte proliferation	14/406	225/18723	0.000418573	0.0050462	0.00368634	CLCF1/PTPRC/HLA-DPA1/VCAM1/CD22/AHR/FOXJ1/CD74/IRF1/CCL5/HLA-DPB1/ANXA1/IGFBP2/HLA-DRB1	14
BP	GO:0045619	regulation of lymphocyte differentiation	12/406	174/18723	0.000427237	0.00513559	0.00375164	PTPRC/HLA-DOA/HLA-DRA/FOXJ1/CD74/IRF1/SLAMF8/ANXA1/RUNX1/MMP14/HLA-DRB1/FGL2	12
BP	GO:0001959	regulation of cytokine-mediated signaling pathway	11/406	150/18723	0.000438225	0.00525231	0.00383691	F2RL1/CAV1/PTPRC/PARP9/CD74/CCL5/ANGPT1/OAS3/IL1R1/OAS1/ISG15	11
BP	GO:0060828	regulation of canonical Wnt signaling pathway	15/406	253/18723	0.000439764	0.00525544	0.00383919	COL1A1/CAV1/LATS2/EGFR/FZD6/SFRP4/DKK1/LGR6/SFRP2/IGFBP2/EGR1/CTHRC1/DRAXIN/FOLR1/PLEKHA4	15
BP	GO:0032944	regulation of mononuclear cell proliferation	14/406	227/18723	0.000457386	0.00545018	0.00398146	CLCF1/PTPRC/HLA-DPA1/VCAM1/CD22/AHR/FOXJ1/CD74/IRF1/CCL5/HLA-DPB1/ANXA1/IGFBP2/HLA-DRB1	14
BP	GO:0001885	endothelial cell development	7/406	64/18723	0.000458865	0.00545201	0.00398279	F2RL1/HAPLN2/VEGFA/MET/S1PR3/MSN/ICAM1	7
BP	GO:2001236	regulation of extrinsic apoptotic signaling pathway	11/406	151/18723	0.000463663	0.00549314	0.00401284	CAV1/PTPRC/IFI6/G0S2/TNFRSF12A/ATF3/THBS1/SP100/SERPINE1/SFRP2/ICAM1	11
BP	GO:0048545	response to steroid hormone	18/406	339/18723	0.000465632	0.00550062	0.0040183	COL1A1/CAV1/SERPINF1/EGFR/SPP1/CNGA3/TFPI/FOSL1/TYMS/THBS1/TGFB2/NR4A3/SDC1/ANXA1/IGFBP2/TRH/AQP1/ICAM1	18
BP	GO:1903046	meiotic cell cycle process	13/406	202/18723	0.000484832	0.00571102	0.004172	SMC4/TOP2A/SGO2/RAD51AP1/NUF2/LIF/BUB1B/BUB1/PTTG1/AURKA/CCNB2/CDC20/TRIP13	13
BP	GO:0030324	lung development	12/406	177/18723	0.000498333	0.00581494	0.00424792	CHI3L1/EGFR/VEGFA/HOXA5/LIF/FOXJ1/RDH10/SPRY1/PDPN/MMP14/ITGA3/TNC	12
BP	GO:0051302	regulation of cell division	12/406	177/18723	0.000498333	0.00581494	0.00424792	ECT2/THBS4/AURKB/KIF20A/VEGFA/TGFB2/AURKA/PLK4/PRC1/SFRP2/KIF18B/PDGFD	12
BP	GO:0071711	basement membrane organization	5/406	31/18723	0.000499251	0.00581494	0.00424792	CAV1/CAV2/NID2/COL4A1/LAMB1	5
BP	GO:1903707	negative regulation of hemopoiesis	9/406	106/18723	0.000499313	0.00581494	0.00424792	FOXJ1/LTF/CD74/IRF1/CDK6/ANXA1/RUNX1/CARTPT/FGL2	9
BP	GO:0072577	endothelial cell apoptotic process	7/406	65/18723	0.000504809	0.00586235	0.00428255	NDNF/CCL2/THBS1/CD248/SERPINE1/ANGPT1/ICAM1	7
BP	GO:0045581	negative regulation of T cell differentiation	6/406	47/18723	0.000507277	0.00587441	0.00429136	FOXJ1/CD74/IRF1/ANXA1/RUNX1/FGL2	6
BP	GO:0006956	complement activation	10/406	130/18723	0.000543823	0.00627994	0.0045876	C3/CFI/C7/C2/C1RL/C1R/MFAP4/CFH/C1S/SERPING1	10
BP	GO:2001238	positive regulation of extrinsic apoptotic signaling pathway	6/406	48/18723	0.000569288	0.00655558	0.00478897	CAV1/PTPRC/G0S2/TNFRSF12A/ATF3/THBS1	6
BP	GO:0034446	substrate adhesion-dependent cell spreading	9/406	108/18723	0.00057263	0.00657564	0.00480362	LAMC1/SPRY4/POSTN/FN1/HAS2/PDPN/GBP1/FLNA/LAMB1	9
BP	GO:0043409	negative regulation of MAPK cascade	12/406	180/18723	0.000579141	0.00663189	0.00484472	F2RL1/CAV1/PTPRC/PBK/SPRY4/DUSP5/LIF/ATF3/FOXM1/SPRY1/SFRP2/GBP1	12
BP	GO:0046651	lymphocyte proliferation	16/406	288/18723	0.000584995	0.00668032	0.00488009	CLCF1/PTPRC/HLA-DPA1/VCAM1/CD22/AHR/FOXJ1/CD74/IRF1/CCL5/HLA-DPB1/ANXA1/IGFBP2/HLA-DRB1/MSN/SLC11A1	16
BP	GO:0051321	meiotic cell cycle	15/406	261/18723	0.000608063	0.00690932	0.00504738	SMC4/TOP2A/SGO2/NEK2/CDK2/RAD51AP1/NUF2/LIF/BUB1B/BUB1/PTTG1/AURKA/CCNB2/CDC20/TRIP13	15
BP	GO:0030323	respiratory tube development	12/406	181/18723	0.00060841	0.00690932	0.00504738	CHI3L1/EGFR/VEGFA/HOXA5/LIF/FOXJ1/RDH10/SPRY1/PDPN/MMP14/ITGA3/TNC	12
BP	GO:0002456	T cell mediated immunity	9/406	109/18723	0.000612464	0.0069362	0.00506702	PTPRC/JAG1/HLA-DRA/AHR/CTSC/RSAD2/HLA-DRB1/IL1R1/ICAM1	9
BP	GO:0070661	leukocyte proliferation	17/406	318/18723	0.000615571	0.00695224	0.00507873	F2RL1/CLCF1/PTPRC/HLA-DPA1/VCAM1/CD22/AHR/FOXJ1/CD74/IRF1/CCL5/HLA-DPB1/ANXA1/IGFBP2/HLA-DRB1/MSN/SLC11A1	17
BP	GO:0006953	acute-phase response	6/406	49/18723	0.000637026	0.00713573	0.00521278	HAMP/CD163/SERPINA1/FN1/SAA1/PLSCR1	6
BP	GO:0052372	modulation by symbiont of entry into host	6/406	49/18723	0.000637026	0.00713573	0.00521278	CXCL8/CAV1/CD74/PTX3/HLA-DRB1/CIITA	6
BP	GO:1902041	regulation of extrinsic apoptotic signaling pathway via death domain receptors	6/406	49/18723	0.000637026	0.00713573	0.00521278	ATF3/THBS1/SP100/SERPINE1/SFRP2/ICAM1	6
BP	GO:2000116	regulation of cysteine-type endopeptidase activity	14/406	235/18723	0.00064483	0.00720352	0.0052623	F3/IFI6/PLAUR/VEGFA/CCN1/S100A8/LTF/THBS1/MMP9/S100A9/SFRP2/AQP1/BIRC5/CD44	14
BP	GO:0032943	mononuclear cell proliferation	16/406	291/18723	0.000654044	0.00728666	0.00532303	CLCF1/PTPRC/HLA-DPA1/VCAM1/CD22/AHR/FOXJ1/CD74/IRF1/CCL5/HLA-DPB1/ANXA1/IGFBP2/HLA-DRB1/MSN/SLC11A1	16
BP	GO:0042698	ovulation cycle	7/406	68/18723	0.000664979	0.00738846	0.0053974	SERPINF1/ADAMTS1/EGFR/TGFB2/HAS2/PTX3/EGR1	7
BP	GO:0043281	regulation of cysteine-type endopeptidase activity involved in apoptotic process	13/406	209/18723	0.000668127	0.00740343	0.00540834	F3/IFI6/PLAUR/VEGFA/CCN1/S100A8/THBS1/MMP9/S100A9/SFRP2/AQP1/BIRC5/CD44	13
BP	GO:0002819	regulation of adaptive immune response	12/406	183/18723	0.000670684	0.00741177	0.00541443	C3/CLCF1/PTPRC/HLA-DRA/AHR/FOXJ1/RSAD2/IRF1/ANXA1/HLA-DRB1/IL1R1/SLC11A1	12
BP	GO:0042742	defense response to bacterium	18/406	350/18723	0.00067635	0.00745436	0.00544554	F2RL1/HAMP/OAS2/S100A8/C5AR1/LTF/COLEC12/SERPINE1/OAS3/SLAMF8/S100A9/GBP2/OAS1/AQP1/SLC11A1/PLA2G2A/ISG15/LYZ	18
BP	GO:0060337	type I interferon signaling pathway	6/406	50/18723	0.000710846	0.0078136	0.00570797	OAS2/SP100/OAS3/STAT1/OAS1/ISG15	6
BP	GO:0031667	response to nutrient levels	22/406	474/18723	0.000718584	0.00787759	0.00575472	HAMP/COL1A1/DAPL1/SOD2/GDF15/VCAM1/EGFR/SPP1/POSTN/C2/ATF3/TYMS/ITGA2/CXCL10/STAT1/SFRP2/IGFBP2/NAMPT/CARTPT/FOLR1/ICAM1/TNC	22
BP	GO:0045669	positive regulation of osteoblast differentiation	7/406	69/18723	0.000726495	0.00794314	0.00580261	NPNT/JAG1/CCN1/LTF/CLIC1/SFRP2/CTHRC1	7
BP	GO:0072073	kidney epithelium development	10/406	136/18723	0.000773911	0.00843912	0.00616492	NPNT/JAG1/IQGAP1/VEGFA/LIF/FOXJ1/SDC1/SPRY1/STAT1/CRLF1	10
BP	GO:0006979	response to oxidative stress	21/406	446/18723	0.000786631	0.00855513	0.00624967	PTGS1/ECT2/COL1A1/FBLN5/SOD2/CA3/EGFR/MET/CYP1B1/MELK/FOSL1/NR4A3/SDC1/MMP9/PDLIM1/STAT1/ANXA1/CDK1/MMP14/AQP1/PDGFD	21
BP	GO:0071622	regulation of granulocyte chemotaxis	6/406	51/18723	0.000791111	0.00858116	0.00626869	CXCL8/THBS4/C5AR1/CD74/THBS1/CCL5	6
BP	GO:0045471	response to ethanol	10/406	137/18723	0.00081909	0.00883801	0.00645632	HAMP/SOD2/VCAM1/CA3/S100A8/TYMS/CDK1/TRH/ICAM1/TNC	10
BP	GO:0090090	negative regulation of canonical Wnt signaling pathway	10/406	137/18723	0.00081909	0.00883801	0.00645632	CAV1/LATS2/FZD6/SFRP4/DKK1/SFRP2/IGFBP2/EGR1/CTHRC1/DRAXIN	10
BP	GO:0000082	G1/S transition of mitotic cell cycle	13/406	214/18723	0.000832194	0.00895588	0.00654243	WEE1/GTSE1/BCAT1/LATS2/ADAMTS1/CCL2/EGFR/CDK2/CDK6/CDKN2C/CDKN3/ANXA1/IQGAP3	13
BP	GO:0060759	regulation of response to cytokine stimulus	11/406	162/18723	0.000834995	0.00896257	0.00654732	F2RL1/CAV1/PTPRC/PARP9/CD74/CCL5/ANGPT1/OAS3/IL1R1/OAS1/ISG15	11
BP	GO:1904892	regulation of receptor signaling pathway via STAT	9/406	114/18723	0.000847121	0.0090539	0.00661403	SOCS3/CAV1/PTPRC/OCIAD2/CYP1B1/LIF/CCL5/GADD45A/SOCS2	9
BP	GO:0010631	epithelial cell migration	18/406	357/18723	0.000849414	0.0090539	0.00661403	SERPINF1/VEGFA/MET/ANGPT2/CYP1B1/LOXL2/THBS1/ITGA2/TGFB2/HAS2/SP100/FSTL1/MMP9/ANGPT1/GADD45A/ANXA1/ITGA3/SRPX2	18
BP	GO:0001906	cell killing	12/406	188/18723	0.000850111	0.0090539	0.00661403	F2RL1/C3/HAMP/PTPRC/HLA-DRA/CTSC/LTF/APOL1/CFH/HLA-DRB1/ICAM1/LYZ	12
BP	GO:0032722	positive regulation of chemokine production	7/406	71/18723	0.000863001	0.00916744	0.00669698	F2RL1/MBP/POSTN/CD74/OAS3/EGR1/OAS1	7
BP	GO:0030111	regulation of Wnt signaling pathway	17/406	328/18723	0.000868182	0.0091987	0.00671981	COL1A1/CAV1/LATS2/EGFR/FZD6/SULF1/SFRP4/DKK1/LGR6/SFRP2/IGFBP2/EGR1/CTHRC1/DRAXIN/FOLR1/PLEKHA4/ITGA3	17
BP	GO:0010718	positive regulation of epithelial to mesenchymal transition	6/406	52/18723	0.000878194	0.0092334	0.00674516	COL1A1/JAG1/LOXL2/TGFB2/CRB2/PDPN	6
BP	GO:0048260	positive regulation of receptor-mediated endocytosis	6/406	52/18723	0.000878194	0.0092334	0.00674516	C3/ANXA2/VEGFA/SFRP4/SERPINE1/ANGPT1	6
BP	GO:0071357	cellular response to type I interferon	6/406	52/18723	0.000878194	0.0092334	0.00674516	OAS2/SP100/OAS3/STAT1/OAS1/ISG15	6
BP	GO:0035633	maintenance of blood-brain barrier	5/406	35/18723	0.000888445	0.00931734	0.00680648	LAMC1/LAMA2/MBP/VEGFA/ANGPT1	5
BP	GO:0071675	regulation of mononuclear cell migration	9/406	115/18723	0.000901839	0.00943374	0.00689151	CCL2/C5AR1/THBS1/CXCL10/CCL5/SERPINE1/SLAMF8/MSN/PDGFD	9
BP	GO:0002700	regulation of production of molecular mediator of immune response	11/406	164/18723	0.000923695	0.00961344	0.00702279	F2RL1/CLCF1/PTPRC/IL13RA2/CD22/RSAD2/CD74/TGFB2/NR4A3/ANGPT1/IL1R1	11
BP	GO:0050680	negative regulation of epithelial cell proliferation	11/406	164/18723	0.000923695	0.00961344	0.00702279	CAV1/CAV2/SERPINF1/CCL2/SULF1/THBS1/TGFB2/CD109/CDK6/STAT1/SFRP2	11
BP	GO:0045132	meiotic chromosome segregation	8/406	93/18723	0.000932417	0.00965218	0.00705109	SMC4/TOP2A/SGO2/NUF2/BUB1B/BUB1/PTTG1/TRIP13	8
BP	GO:0051591	response to cAMP	8/406	93/18723	0.000932417	0.00965218	0.00705109	THBD/COL1A1/CNGA3/AHR/FOSL1/SDC1/STAT1/AQP1	8
BP	GO:0090132	epithelium migration	18/406	360/18723	0.000934461	0.00965218	0.00705109	SERPINF1/VEGFA/MET/ANGPT2/CYP1B1/LOXL2/THBS1/ITGA2/TGFB2/HAS2/SP100/FSTL1/MMP9/ANGPT1/GADD45A/ANXA1/ITGA3/SRPX2	18
BP	GO:0071479	cellular response to ionizing radiation	7/406	72/18723	0.000938439	0.00966898	0.00706336	HAMP/ECT2/RAD51AP1/GADD45A/SFRP2/EGR1/NAMPT	7
BP	GO:0021782	glial cell development	9/406	116/18723	0.000959393	0.00986016	0.00720302	FA2H/EGFR/S100A8/C5AR1/CDK6/S100A9/VIM/NKX6-2/MAG	9
BP	GO:0070663	regulation of leukocyte proliferation	14/406	245/18723	0.000967261	0.00989724	0.00723011	CLCF1/PTPRC/HLA-DPA1/VCAM1/CD22/AHR/FOXJ1/CD74/IRF1/CCL5/HLA-DPB1/ANXA1/IGFBP2/HLA-DRB1	14
BP	GO:0007292	female gamete generation	10/406	140/18723	0.000967816	0.00989724	0.00723011	SOHLH1/TOP2A/ADAMTS1/TNFAIP6/FOSL1/AURKA/CCNB2/PTX3/TRIP13/CCNB1	10
BP	GO:0033630	positive regulation of cell adhesion mediated by integrin	4/406	21/18723	0.000973072	0.00990173	0.00723339	LIF/CCL5/TGFB2/SFRP2	4
BP	GO:0038083	peptidyl-tyrosine autophosphorylation	4/406	21/18723	0.000973072	0.00990173	0.00723339	CAV1/IQGAP1/EGFR/VEGFA	4
BP	GO:0060070	canonical Wnt signaling pathway	16/406	303/18723	0.00100431	0.0101943	0.00744713	COL1A1/CAV1/LATS2/EGFR/FZD6/SFRP4/SDC1/DKK1/LGR6/SFRP2/IGFBP2/EGR1/CTHRC1/DRAXIN/FOLR1/PLEKHA4	16
BP	GO:0097191	extrinsic apoptotic signaling pathway	13/406	219/18723	0.00102884	0.0104177	0.0076103	CAV1/PTPRC/IFI6/G0S2/TNFRSF12A/ATF3/THBS1/TGFB2/SP100/SERPINE1/BCL2A1/SFRP2/ICAM1	13
BP	GO:0007565	female pregnancy	12/406	193/18723	0.00106794	0.010787	0.00788007	THBD/TIMP1/SPP1/VEGFA/ANGPT2/LIF/FOSL1/ITGA2/MMP9/IGFBP2/NAMPT/ITGA3	12
BP	GO:0007044	cell-substrate junction assembly	8/406	95/18723	0.001072	0.0107934	0.00788476	LAMC1/ACTN1/IQGAP1/VEGFA/FN1/THBS1/ITGA2/MMP14	8
BP	GO:0007009	plasma membrane organization	10/406	142/18723	0.00107874	0.0107934	0.00788476	MYOF/FA2H/CAV1/PTPRC/CAV2/TGFB2/PLSCR1/COL5A1/S100A9/FOLR1	10
BP	GO:0050729	positive regulation of inflammatory response	10/406	142/18723	0.00107874	0.0107934	0.00788476	C3/OSMR/EGFR/S100A8/CTSC/ALOX5AP/ITGA2/SERPINE1/S100A9/PLA2G2A	10
BP	GO:0034356	NAD biosynthesis via nicotinamide riboside salvage pathway	3/406	10/18723	0.00108433	0.0107934	0.00788476	PARP9/NAMPT/NNMT	3
BP	GO:0051918	negative regulation of fibrinolysis	3/406	10/18723	0.00108433	0.0107934	0.00788476	THBD/THBS1/SERPINE1	3
BP	GO:2000425	regulation of apoptotic cell clearance	3/406	10/18723	0.00108433	0.0107934	0.00788476	C3/CCL2/C2	3
BP	GO:0071219	cellular response to molecule of bacterial origin	13/406	221/18723	0.00111771	0.0110988	0.00810784	CMPK2/CXCL8/HAMP/CCL2/TFPI/LTF/TLR1/CXCL10/CCL5/CXCL1/SERPINE1/VIM/ICAM1	13
BP	GO:0002822	regulation of adaptive immune response based on somatic recombination of immune receptors built from immunoglobulin superfamily domains	11/406	168/18723	0.00112456	0.0111399	0.00813791	C3/CLCF1/PTPRC/HLA-DRA/AHR/FOXJ1/RSAD2/ANXA1/HLA-DRB1/IL1R1/SLC11A1	11
BP	GO:1901988	negative regulation of cell cycle phase transition	14/406	249/18723	0.0011297	0.0111639	0.00815543	WEE1/GTSE1/CCL2/AURKB/CDK2/CDC45/DTL/BUB1B/BUB1/NDC80/CDK1/TRIP13/CCNB1/CENPF	14
BP	GO:0031023	microtubule organizing center organization	10/406	143/18723	0.00113798	0.0112188	0.00819556	KIF11/NEK2/CDK2/FOXJ1/PCLAF/NDC80/AURKA/GADD45A/PLK4/CDK1	10
BP	GO:1904035	regulation of epithelial cell apoptotic process	8/406	96/18723	0.0011478	0.0112885	0.00824644	NDNF/CCL2/SFRP4/THBS1/CD248/SERPINE1/ANGPT1/ICAM1	8
BP	GO:0032570	response to progesterone	5/406	37/18723	0.00115138	0.0112945	0.00825082	CAV1/FOSL1/TYMS/THBS1/TGFB2	5
BP	GO:0031349	positive regulation of defense response	15/406	278/18723	0.0011539	0.0112945	0.00825082	F2RL1/C3/OSMR/EGFR/S100A8/CTSC/ALOX5AP/PARP9/PLA2G5/ITGA2/CCL5/SERPINE1/PLSCR1/S100A9/PLA2G2A	15
BP	GO:0000768	syncytium formation by plasma membrane fusion	6/406	55/18723	0.00118422	0.011509	0.00840754	MYOF/PTGFRN/GDF15/CXCL10/CD109/ADAMTS15	6
BP	GO:0045620	negative regulation of lymphocyte differentiation	6/406	55/18723	0.00118422	0.011509	0.00840754	FOXJ1/CD74/IRF1/ANXA1/RUNX1/FGL2	6
BP	GO:0140253	cell-cell fusion	6/406	55/18723	0.00118422	0.011509	0.00840754	MYOF/PTGFRN/GDF15/CXCL10/CD109/ADAMTS15	6
BP	GO:0071674	mononuclear cell migration	12/406	196/18723	0.00121958	0.0118247	0.00863818	CCL2/C5AR1/SAA1/THBS1/CXCL10/CCL5/SERPINE1/SLAMF8/ANXA1/MSN/ICAM1/PDGFD	12
BP	GO:0009410	response to xenobiotic stimulus	21/406	462/18723	0.00122312	0.0118312	0.00864288	COL1A1/TGIF1/SOD2/EGFR/CYP1B1/AHR/FOSL1/TYMS/ITGA2/TGFB2/SLAMF8/STAT1/ANXA1/SFRP2/IGFBP2/CDK1/NNMT/ICAM1/CCNB1/ITGA3/CENPF	21
BP	GO:0046456	icosanoid biosynthetic process	6/406	56/18723	0.00130248	0.0125692	0.00918203	FABP5/PTGS1/ALOX5AP/PLA2G5/CD74/ANXA1	6
BP	GO:0070301	cellular response to hydrogen peroxide	8/406	98/18723	0.00131219	0.0126333	0.00922883	ECT2/MET/CYP1B1/NR4A3/ANXA1/CDK1/AQP1/PDGFD	8
BP	GO:0045580	regulation of T cell differentiation	10/406	146/18723	0.00133185	0.0127926	0.0093452	PTPRC/HLA-DOA/HLA-DRA/FOXJ1/CD74/IRF1/ANXA1/RUNX1/HLA-DRB1/FGL2	10
BP	GO:0001933	negative regulation of protein phosphorylation	17/406	342/18723	0.00136697	0.0130993	0.00956927	SOCS3/CAV1/PTPRC/LATS2/PBK/IGFBP3/SPRY4/NIBAN1/CD109/CDKN2C/DKK1/ANGPT1/GADD45A/SPRY1/PKIB/SFRP2/CCNB1	17
BP	GO:0042098	T cell proliferation	12/406	199/18723	0.00138864	0.0131784	0.00962706	PTPRC/HLA-DPA1/VCAM1/FOXJ1/IRF1/CCL5/HLA-DPB1/ANXA1/IGFBP2/HLA-DRB1/MSN/SLC11A1	12
BP	GO:0009162	deoxyribonucleoside monophosphate metabolic process	4/406	23/18723	0.00139125	0.0131784	0.00962706	DPYD/TYMS/TK1/TYMP	4
BP	GO:0030194	positive regulation of blood coagulation	4/406	23/18723	0.00139125	0.0131784	0.00962706	THBD/F3/THBS1/SERPINE1	4
BP	GO:0051383	kinetochore organization	4/406	23/18723	0.00139125	0.0131784	0.00962706	SMC4/NUF2/NDC80/CENPF	4
BP	GO:1900048	positive regulation of hemostasis	4/406	23/18723	0.00139125	0.0131784	0.00962706	THBD/F3/THBS1/SERPINE1	4
BP	GO:0006949	syncytium formation	6/406	57/18723	0.00142955	0.0134791	0.0098467	MYOF/PTGFRN/GDF15/CXCL10/CD109/ADAMTS15	6
BP	GO:1900024	regulation of substrate adhesion-dependent cell spreading	6/406	57/18723	0.00142955	0.0134791	0.0098467	SPRY4/POSTN/HAS2/PDPN/GBP1/FLNA	6
BP	GO:0002764	immune response-regulating signaling pathway	21/406	468/18723	0.00143348	0.0134852	0.00985119	F2RL1/CAV1/PTPRC/HLA-DQB1/CD22/C5AR1/LTF/RSAD2/TLR1/COLEC12/IRF1/FPR1/NR4A3/PLSCR1/HLA-DPB1/OAS3/GBP1/FYB1/HLA-DRB1/FPR3/OAS1	21
BP	GO:0030168	platelet activation	9/406	123/18723	0.00145105	0.0135301	0.00988396	THBD/FZD6/COL3A1/FN1/SAA1/PLSCR1/CLIC1/PDPN/FLNA	9
BP	GO:0001765	membrane raft assembly	3/406	11/18723	0.00146706	0.0135301	0.00988396	CAV1/CAV2/ANXA2	3
BP	GO:0007144	female meiosis I	3/406	11/18723	0.00146706	0.0135301	0.00988396	AURKA/CCNB2/TRIP13	3
BP	GO:0033690	positive regulation of osteoblast proliferation	3/406	11/18723	0.00146706	0.0135301	0.00988396	CCN1/LTF/CTHRC1	3
BP	GO:0035404	histone-serine phosphorylation	3/406	11/18723	0.00146706	0.0135301	0.00988396	AURKB/AURKA/CCNB1	3
BP	GO:0043589	skin morphogenesis	3/406	11/18723	0.00146706	0.0135301	0.00988396	COL1A1/COL1A2/ITGA2	3
BP	GO:0070601	centromeric sister chromatid cohesion	3/406	11/18723	0.00146706	0.0135301	0.00988396	SGO2/BUB1B/BUB1	3
BP	GO:2000343	positive regulation of chemokine (C-X-C motif) ligand 2 production	3/406	11/18723	0.00146706	0.0135301	0.00988396	MBP/POSTN/CD74	3
BP	GO:0032728	positive regulation of interferon-beta production	5/406	39/18723	0.00146787	0.0135301	0.00988396	OAS2/IRF1/OAS3/OAS1/ISG15	5
BP	GO:0051384	response to glucocorticoid	10/406	148/18723	0.00147542	0.0135693	0.00991259	SERPINF1/EGFR/FOSL1/TYMS/SDC1/ANXA1/IGFBP2/TRH/AQP1/ICAM1	10
BP	GO:0045807	positive regulation of endocytosis	8/406	100/18723	0.00149478	0.0137166	0.0100202	F2RL1/C3/ANXA2/VEGFA/SFRP4/ITGA2/SERPINE1/ANGPT1	8
BP	GO:0001649	osteoblast differentiation	13/406	229/18723	0.00153985	0.0140988	0.0102994	COL1A1/NPNT/JAG1/MRC2/SPP1/CCN1/LTF/CDK6/CLIC1/SFRP2/IBSP/CTHRC1/TNC	13
BP	GO:0032481	positive regulation of type I interferon production	6/406	58/18723	0.00156586	0.014305	0.01045	OAS2/IRF1/OAS3/STAT1/OAS1/ISG15	6
BP	GO:0031348	negative regulation of defense response	14/406	258/18723	0.00158029	0.0144048	0.010523	HAMP/SOCS3/PTPRC/SERPINF1/PBK/TNFAIP6/SAA1/OAS3/SLAMF8/HLA-DRB1/OAS1/FGL2/SERPING1/ISG15	14
BP	GO:0150115	cell-substrate junction organization	8/406	101/18723	0.00159334	0.0144916	0.0105864	LAMC1/ACTN1/IQGAP1/VEGFA/FN1/THBS1/ITGA2/MMP14	8
BP	GO:0010634	positive regulation of epithelial cell migration	11/406	176/18723	0.00163476	0.0147223	0.0107549	VEGFA/MET/THBS1/ITGA2/TGFB2/HAS2/MMP9/ANGPT1/ANXA1/ITGA3/SRPX2	11
BP	GO:0006213	pyrimidine nucleoside metabolic process	4/406	24/18723	0.0016412	0.0147223	0.0107549	DPYD/APOBEC3C/TK1/TYMP	4
BP	GO:0009219	pyrimidine deoxyribonucleotide metabolic process	4/406	24/18723	0.0016412	0.0147223	0.0107549	CMPK2/DPYD/TYMS/TYMP	4
BP	GO:0040037	negative regulation of fibroblast growth factor receptor signaling pathway	4/406	24/18723	0.0016412	0.0147223	0.0107549	SPRY4/SULF1/THBS1/SPRY1	4
BP	GO:0050820	positive regulation of coagulation	4/406	24/18723	0.0016412	0.0147223	0.0107549	THBD/F3/THBS1/SERPINE1	4
BP	GO:0090023	positive regulation of neutrophil chemotaxis	4/406	24/18723	0.0016412	0.0147223	0.0107549	CXCL8/THBS4/C5AR1/CD74	4
BP	GO:0060541	respiratory system development	12/406	203/18723	0.00164376	0.0147223	0.0107549	CHI3L1/EGFR/VEGFA/HOXA5/LIF/FOXJ1/RDH10/SPRY1/PDPN/MMP14/ITGA3/TNC	12
BP	GO:1901214	regulation of neuron death	16/406	319/18723	0.00170877	0.015268	0.0111536	CLCF1/NDNF/SERPINF1/SOD2/CCL2/MYBL2/C5AR1/CCL5/TGFB2/NR4A3/DKK1/ANGPT1/CRLF1/EGR1/DRAXIN/MAG	16
BP	GO:0048754	branching morphogenesis of an epithelial tube	10/406	151/18723	0.00171414	0.015268	0.0111536	NPNT/VEGFA/MET/HOXA5/RDH10/COL4A1/SPRY1/SFRP2/MMP14/TNC	10
BP	GO:2001235	positive regulation of apoptotic signaling pathway	9/406	126/18723	0.00171584	0.015268	0.0111536	CAV1/PTPRC/G0S2/S100A8/CTSC/TNFRSF12A/ATF3/THBS1/S100A9	9
BP	GO:0030099	myeloid cell differentiation	18/406	381/18723	0.00175942	0.015622	0.0114122	F2RL1/JAG1/ACTN1/ANXA2/VEGFA/HOXA5/SCIN/LIF/LTF/CD74/CD109/CDK6/MMP9/STAT1/RUNX1/HLA-DRB1/CARTPT/ISG15	18
BP	GO:0030509	BMP signaling pathway	10/406	152/18723	0.00180032	0.0159507	0.0116523	GDF15/CCN1/SULF1/SFRP4/TGFB2/FSTL1/CRB2/SFRP2/EGR1/ITGA3	10
BP	GO:0001953	negative regulation of cell-matrix adhesion	5/406	41/18723	0.00184413	0.0162339	0.0118591	JAG1/POSTN/THBS1/SERPINE1/MMP14	5
BP	GO:0071634	regulation of transforming growth factor beta production	5/406	41/18723	0.00184413	0.0162339	0.0118591	LTBP1/LUM/FN1/THBS1/TGFB2	5
BP	GO:1905521	regulation of macrophage migration	5/406	41/18723	0.00184413	0.0162339	0.0118591	C5AR1/THBS1/CCL5/SLAMF8/MMP14	5
BP	GO:0009620	response to fungus	6/406	60/18723	0.00186789	0.0163422	0.0119383	HAMP/S100A8/LTF/PLA2G5/S100A9/PTX3	6
BP	GO:0010632	regulation of epithelial cell migration	15/406	292/18723	0.00187085	0.0163422	0.0119383	SERPINF1/VEGFA/MET/ANGPT2/THBS1/ITGA2/TGFB2/HAS2/SP100/MMP9/ANGPT1/GADD45A/ANXA1/ITGA3/SRPX2	15
BP	GO:0001960	negative regulation of cytokine-mediated signaling pathway	7/406	81/18723	0.00187632	0.0163422	0.0119383	F2RL1/CAV1/PTPRC/CCL5/OAS3/OAS1/ISG15	7
BP	GO:0030512	negative regulation of transforming growth factor beta receptor signaling pathway	7/406	81/18723	0.00187632	0.0163422	0.0119383	CAV1/CAV2/LTBP1/VASN/SLC2A10/CD109/SPRY1	7
BP	GO:0071260	cellular response to mechanical stimulus	7/406	81/18723	0.00187632	0.0163422	0.0119383	COL1A1/EGFR/ITGA2/IRF1/GADD45A/AQP1/MAG	7
BP	GO:0001952	regulation of cell-matrix adhesion	9/406	128/18723	0.00191291	0.0163486	0.0119429	JAG1/IQGAP1/VEGFA/POSTN/THBS1/CDK6/SERPINE1/PLAU/MMP14	9
BP	GO:0042692	muscle cell differentiation	18/406	384/18723	0.0019167	0.0163486	0.0119429	FLNC/MYOF/HAMP/NPNT/CAV2/PTGFRN/ACTN1/SOD2/GDF15/VEGFA/CXCL10/SDC1/DKK1/CDK1/MMP14/ALPK3/CCNB1/ADAMTS15	18
BP	GO:0060706	cell differentiation involved in embryonic placenta development	4/406	25/18723	0.00192073	0.0163486	0.0119429	SOCS3/ST14/LIF/PLK4	4
BP	GO:0071459	protein localization to chromosome, centromeric region	4/406	25/18723	0.00192073	0.0163486	0.0119429	AURKB/BUB1B/NDC80/CDK1	4
BP	GO:0009176	pyrimidine deoxyribonucleoside monophosphate metabolic process	3/406	12/18723	0.00192476	0.0163486	0.0119429	DPYD/TYMS/TYMP	3
BP	GO:0010454	negative regulation of cell fate commitment	3/406	12/18723	0.00192476	0.0163486	0.0119429	DKK1/SFRP2/NKX6-2	3
BP	GO:0038063	collagen-activated tyrosine kinase receptor signaling pathway	3/406	12/18723	0.00192476	0.0163486	0.0119429	COL1A1/COL4A2/COL4A1	3
BP	GO:0043380	regulation of memory T cell differentiation	3/406	12/18723	0.00192476	0.0163486	0.0119429	HLA-DRA/HLA-DRB1/FGL2	3
BP	GO:0045602	negative regulation of endothelial cell differentiation	3/406	12/18723	0.00192476	0.0163486	0.0119429	JAG1/VEGFA/S1PR3	3
BP	GO:0051255	spindle midzone assembly	3/406	12/18723	0.00192476	0.0163486	0.0119429	AURKB/PRC1/KIF4A	3
BP	GO:0060009	Sertoli cell development	3/406	12/18723	0.00192476	0.0163486	0.0119429	SDC1/FLNA/ICAM1	3
BP	GO:0070493	thrombin-activated receptor signaling pathway	3/406	12/18723	0.00192476	0.0163486	0.0119429	F2RL1/IQGAP2/MET	3
BP	GO:0002699	positive regulation of immune effector process	13/406	235/18723	0.00193681	0.016417	0.0119929	F2RL1/C3/CLCF1/PTPRC/IL13RA2/HLA-DRA/RSAD2/PLA2G5/CD74/NR4A3/ANXA1/HLA-DRB1/IL1R1	13
BP	GO:0002573	myeloid leukocyte differentiation	12/406	208/18723	0.00201572	0.0170507	0.0124558	F2RL1/ANXA2/VEGFA/LIF/LTF/CD74/CD109/CDK6/MMP9/RUNX1/HLA-DRB1/CARTPT	12
BP	GO:0034113	heterotypic cell-cell adhesion	6/406	61/18723	0.00203449	0.0171741	0.012546	PTPRC/MBP/VCAM1/ITGA5/CD58/CD44	6
BP	GO:0007520	myoblast fusion	5/406	42/18723	0.00205665	0.0173256	0.0126566	MYOF/PTGFRN/GDF15/CXCL10/ADAMTS15	5
BP	GO:0060562	epithelial tube morphogenesis	16/406	325/18723	0.0020628	0.0173418	0.0126685	NPNT/VEGFA/MET/HOXA5/FZD6/ST14/CXCL10/TGFB2/RDH10/COL4A1/SPRY1/SFRP2/MMP14/CTHRC1/FOLR1/TNC	16
BP	GO:0071222	cellular response to lipopolysaccharide	12/406	209/18723	0.00209781	0.0176002	0.0128572	CMPK2/CXCL8/HAMP/CCL2/TFPI/LTF/CXCL10/CCL5/CXCL1/SERPINE1/VIM/ICAM1	12
BP	GO:0007098	centrosome cycle	9/406	130/18723	0.00212765	0.0178142	0.0130136	KIF11/NEK2/CDK2/PCLAF/NDC80/AURKA/GADD45A/PLK4/CDK1	9
BP	GO:0045637	regulation of myeloid cell differentiation	12/406	210/18723	0.00218261	0.0182372	0.0133226	JAG1/HOXA5/SCIN/LIF/LTF/CD74/CDK6/STAT1/RUNX1/HLA-DRB1/CARTPT/ISG15	12
BP	GO:0002831	regulation of response to biotic stimulus	16/406	327/18723	0.00219364	0.0182922	0.0133627	F2RL1/AHR/PARP9/LTF/PLA2G5/IRF1/CCL5/PLSCR1/OAS3/SLAMF8/STAT1/HLA-DRB1/OAS1/FGL2/SERPING1/ISG15	16
BP	GO:1905523	positive regulation of macrophage migration	4/406	26/18723	0.00223153	0.018533	0.0135387	C5AR1/THBS1/CCL5/MMP14	4
BP	GO:2000050	regulation of non-canonical Wnt signaling pathway	4/406	26/18723	0.00223153	0.018533	0.0135387	SFRP4/DKK1/SFRP2/PLEKHA4	4
BP	GO:0046683	response to organophosphorus	9/406	131/18723	0.002242	0.0185449	0.0135474	THBD/COL1A1/CNGA3/AHR/FOSL1/TYMS/SDC1/STAT1/AQP1	9
BP	GO:0090101	negative regulation of transmembrane receptor protein serine/threonine kinase signaling pathway	9/406	131/18723	0.002242	0.0185449	0.0135474	CAV1/CAV2/LTBP1/VASN/SLC2A10/CD109/DKK1/SPRY1/SFRP2	9
BP	GO:0001894	tissue homeostasis	14/406	268/18723	0.00224742	0.0185525	0.0135529	HAMP/LAMC1/LAMA2/MBP/EGFR/SPP1/VEGFA/LTF/ANGPT1/CRB2/CARTPT/OAS1/USH1C/LYZ	14
BP	GO:0030100	regulation of endocytosis	12/406	211/18723	0.0022702	0.018703	0.0136628	F2RL1/C3/CAV1/ANXA2/VEGFA/CD22/SFRP4/ITGA2/DKK1/SERPINE1/ANGPT1/ARC	12
BP	GO:0031952	regulation of protein autophosphorylation	5/406	43/18723	0.0022865	0.0187621	0.013706	CAV1/PTPRC/IQGAP1/VEGFA/PDGFD	5
BP	GO:0071604	transforming growth factor beta production	5/406	43/18723	0.0022865	0.0187621	0.013706	LTBP1/LUM/FN1/THBS1/TGFB2	5
BP	GO:0002824	positive regulation of adaptive immune response based on somatic recombination of immune receptors built from immunoglobulin superfamily domains	8/406	107/18723	0.00229773	0.0188167	0.0137459	C3/CLCF1/PTPRC/HLA-DRA/RSAD2/HLA-DRB1/IL1R1/SLC11A1	8
BP	GO:2000242	negative regulation of reproductive process	6/406	63/18723	0.00240111	0.0195784	0.0143024	SERPINF1/TIMP1/LIF/SULF1/PLAT/TRIP13	6
BP	GO:0070997	neuron death	17/406	361/18723	0.00241522	0.0195784	0.0143024	CLCF1/NDNF/SERPINF1/SOD2/CCL2/MYBL2/C5AR1/CCL5/TGFB2/NR4A3/DKK1/ANGPT1/CRLF1/EGR1/NAMPT/DRAXIN/MAG	17
BP	GO:0002832	negative regulation of response to biotic stimulus	8/406	108/18723	0.00243574	0.0195784	0.0143024	AHR/LTF/OAS3/SLAMF8/OAS1/FGL2/SERPING1/ISG15	8
BP	GO:0006958	complement activation, classical pathway	8/406	108/18723	0.00243574	0.0195784	0.0143024	C3/CFI/C7/C2/C1RL/C1R/C1S/SERPING1	8
BP	GO:0002430	complement receptor mediated signaling pathway	3/406	13/18723	0.00246218	0.0195784	0.0143024	C5AR1/FPR1/FPR3	3
BP	GO:0010755	regulation of plasminogen activation	3/406	13/18723	0.00246218	0.0195784	0.0143024	THBS1/SERPINE1/RUNX1	3
BP	GO:0031392	regulation of prostaglandin biosynthetic process	3/406	13/18723	0.00246218	0.0195784	0.0143024	FABP5/CD74/ANXA1	3
BP	GO:0034112	positive regulation of homotypic cell-cell adhesion	3/406	13/18723	0.00246218	0.0195784	0.0143024	PLAUR/CCL5/PDPN	3
BP	GO:0043379	memory T cell differentiation	3/406	13/18723	0.00246218	0.0195784	0.0143024	HLA-DRA/HLA-DRB1/FGL2	3
BP	GO:0048711	positive regulation of astrocyte differentiation	3/406	13/18723	0.00246218	0.0195784	0.0143024	CLCF1/LIF/MAG	3
BP	GO:0060100	positive regulation of phagocytosis, engulfment	3/406	13/18723	0.00246218	0.0195784	0.0143024	F2RL1/C3/ITGA2	3
BP	GO:0060707	trophoblast giant cell differentiation	3/406	13/18723	0.00246218	0.0195784	0.0143024	SOCS3/LIF/PLK4	3
BP	GO:0072310	glomerular epithelial cell development	3/406	13/18723	0.00246218	0.0195784	0.0143024	JAG1/IQGAP1/FOXJ1	3
BP	GO:1902947	regulation of tau-protein kinase activity	3/406	13/18723	0.00246218	0.0195784	0.0143024	C5AR1/DKK1/EGR1	3
BP	GO:1905155	positive regulation of membrane invagination	3/406	13/18723	0.00246218	0.0195784	0.0143024	F2RL1/C3/ITGA2	3
BP	GO:0042509	regulation of tyrosine phosphorylation of STAT protein	7/406	85/18723	0.00247438	0.0196374	0.0143455	CLCF1/SOCS3/CAV1/LIF/PARP9/CCL5/CRLF1	7
BP	GO:0009262	deoxyribonucleotide metabolic process	5/406	44/18723	0.00253448	0.020037	0.0146374	CMPK2/RRM2/DPYD/TYMS/TYMP	5
BP	GO:0062208	positive regulation of pattern recognition receptor signaling pathway	5/406	44/18723	0.00253448	0.020037	0.0146374	F2RL1/CAV1/LTF/RSAD2/TLR1	5
BP	GO:1903131	mononuclear cell differentiation	19/406	426/18723	0.00254094	0.0200495	0.0146465	F2RL1/CLCF1/PTPRC/VCAM1/HLA-DOA/VEGFA/HLA-DRA/FOXJ1/RSAD2/CD74/IRF1/CDK6/SLAMF8/ANXA1/RUNX1/EGR1/MMP14/HLA-DRB1/FGL2	19
BP	GO:0051098	regulation of binding	17/406	363/18723	0.00255685	0.0201277	0.0147036	CAV1/SLN/ANXA2/PLAUR/AURKB/HJURP/NEK2/MET/LIF/PARP9/ITGA2/DKK1/AURKA/SP100/MMP9/ANGPT1/CTHRC1	17
BP	GO:0003401	axis elongation	4/406	27/18723	0.00257533	0.0201277	0.0147036	RDH10/SPRY1/SFRP2/TNC	4
BP	GO:0010758	regulation of macrophage chemotaxis	4/406	27/18723	0.00257533	0.0201277	0.0147036	C5AR1/THBS1/CCL5/SLAMF8	4
BP	GO:0060333	interferon-gamma-mediated signaling pathway	4/406	27/18723	0.00257533	0.0201277	0.0147036	PARP9/IRF1/SP100/STAT1	4
BP	GO:0071624	positive regulation of granulocyte chemotaxis	4/406	27/18723	0.00257533	0.0201277	0.0147036	CXCL8/THBS4/C5AR1/CD74	4
BP	GO:0048568	embryonic organ development	19/406	427/18723	0.00260761	0.0203413	0.0148597	CXCL8/SOCS3/PIFO/HOXD9/VEGFA/HOXA5/FZD6/CCN1/TEAD4/ST14/LIF/TGFB2/RDH10/PLK4/CRB2/MMP14/CTHRC1/USH1C/FOLR1	19
BP	GO:0060761	negative regulation of response to cytokine stimulus	7/406	86/18723	0.00264455	0.0205904	0.0150417	F2RL1/CAV1/PTPRC/CCL5/OAS3/OAS1/ISG15	7
BP	GO:0048259	regulation of receptor-mediated endocytosis	8/406	110/18723	0.00273118	0.0212247	0.0155051	C3/ANXA2/VEGFA/SFRP4/DKK1/SERPINE1/ANGPT1/ARC	8
BP	GO:0002920	regulation of humoral immune response	5/406	45/18723	0.00280141	0.0217294	0.0158737	C3/PTPRC/FOXJ1/CFH/SERPING1	5
BP	GO:0051271	negative regulation of cellular component movement	17/406	367/18723	0.00286097	0.022108	0.0161503	SERPINF1/JAG1/ACTN1/CCL2/IGFBP3/TIMP1/COL3A1/ANGPT2/CYP1B1/SULF1/CD74/THBS1/SP100/SERPINE1/SLAMF8/GADD45A/SFRP2	17
BP	GO:0140694	non-membrane-bounded organelle assembly	17/406	367/18723	0.00286097	0.022108	0.0161503	KIF15/KIF11/MYBL2/AURKB/NEK2/CDK2/KIFC1/AURKA/CCNB2/PLK4/PRC1/TPX2/FLNA/MSN/CDC20/KIF4A/CENPF	17
BP	GO:0031668	cellular response to extracellular stimulus	13/406	246/18723	0.00288322	0.0221964	0.0162149	COL1A1/PTPRC/DAPL1/VCAM1/POSTN/FOSL1/ATF3/SFRP2/NAMPT/CARTPT/FOLR1/ICAM1/TNC	13
BP	GO:0071216	cellular response to biotic stimulus	13/406	246/18723	0.00288322	0.0221964	0.0162149	CMPK2/CXCL8/HAMP/CCL2/TFPI/LTF/TLR1/CXCL10/CCL5/CXCL1/SERPINE1/VIM/ICAM1	13
BP	GO:0010575	positive regulation of vascular endothelial growth factor production	4/406	28/18723	0.00295378	0.0226972	0.0165807	C3/CYP1B1/C5AR1/SULF1	4
BP	GO:0007260	tyrosine phosphorylation of STAT protein	7/406	88/18723	0.00301173	0.0230993	0.0168745	CLCF1/SOCS3/CAV1/LIF/PARP9/CCL5/CRLF1	7
BP	GO:0050671	positive regulation of lymphocyte proliferation	9/406	137/18723	0.00303471	0.0232086	0.0169543	CLCF1/PTPRC/HLA-DPA1/VCAM1/CD74/CCL5/HLA-DPB1/ANXA1/IGFBP2	9
BP	GO:0018209	peptidyl-serine modification	16/406	338/18723	0.00304324	0.0232086	0.0169543	NDNF/CAV1/LATS2/AURKB/EGFR/VEGFA/CDK2/LIF/DKK1/AURKA/ANGPT1/GADD45A/SFRP2/CDK1/CCNB1/CD44	16
BP	GO:0002821	positive regulation of adaptive immune response	8/406	112/18723	0.00305389	0.0232086	0.0169543	C3/CLCF1/PTPRC/HLA-DRA/RSAD2/HLA-DRB1/IL1R1/SLC11A1	8
BP	GO:0007100	mitotic centrosome separation	3/406	14/18723	0.00308363	0.0232086	0.0169543	KIF11/NEK2/AURKA	3
BP	GO:0010771	negative regulation of cell morphogenesis involved in differentiation	3/406	14/18723	0.00308363	0.0232086	0.0169543	SPRY4/POSTN/GBP1	3
BP	GO:0044764	multi-organism cellular process	3/406	14/18723	0.00308363	0.0232086	0.0169543	CAV1/CAV2/SIGLEC1	3
BP	GO:0051917	regulation of fibrinolysis	3/406	14/18723	0.00308363	0.0232086	0.0169543	THBD/THBS1/SERPINE1	3
BP	GO:0070141	response to UV-A	3/406	14/18723	0.00308363	0.0232086	0.0169543	EGFR/TIMP1/MMP9	3
BP	GO:0090715	immunological memory formation process	3/406	14/18723	0.00308363	0.0232086	0.0169543	HLA-DRA/HLA-DRB1/FGL2	3
BP	GO:1900025	negative regulation of substrate adhesion-dependent cell spreading	3/406	14/18723	0.00308363	0.0232086	0.0169543	SPRY4/POSTN/GBP1	3
BP	GO:0061028	establishment of endothelial barrier	5/406	46/18723	0.00308808	0.0232086	0.0169543	F2RL1/VEGFA/S1PR3/MSN/ICAM1	5
BP	GO:0032946	positive regulation of mononuclear cell proliferation	9/406	138/18723	0.00318599	0.0239007	0.0174599	CLCF1/PTPRC/HLA-DPA1/VCAM1/CD74/CCL5/HLA-DPB1/ANXA1/IGFBP2	9
BP	GO:0044706	multi-multicellular organism process	12/406	220/18723	0.00319515	0.0239258	0.0174782	THBD/TIMP1/SPP1/VEGFA/ANGPT2/LIF/FOSL1/ITGA2/MMP9/IGFBP2/NAMPT/ITGA3	12
BP	GO:0022604	regulation of cell morphogenesis	15/406	309/18723	0.00320695	0.0239705	0.0175108	CCL2/SPRY4/VEGFA/POSTN/FN1/HAS2/FBLIM1/PDPN/ANXA1/GBP1/FLNA/ARC/MSN/ICAM1/CD44	15
BP	GO:0071772	response to BMP	10/406	165/18723	0.00327497	0.0243894	0.0178169	GDF15/CCN1/SULF1/SFRP4/TGFB2/FSTL1/CRB2/SFRP2/EGR1/ITGA3	10
BP	GO:0071773	cellular response to BMP stimulus	10/406	165/18723	0.00327497	0.0243894	0.0178169	GDF15/CCN1/SULF1/SFRP4/TGFB2/FSTL1/CRB2/SFRP2/EGR1/ITGA3	10
BP	GO:0010517	regulation of phospholipase activity	6/406	67/18723	0.0032808	0.0243894	0.0178169	EGFR/CCN1/C5AR1/PLA2G5/CCL5/ANXA1	6
BP	GO:0001935	endothelial cell proliferation	11/406	193/18723	0.00335251	0.0248173	0.0181294	F3/CAV1/CAV2/THBS4/CCL2/VEGFA/LOXL2/SULF1/THBS1/STAT1/MMP14	11
BP	GO:0007143	female meiotic nuclear division	4/406	29/18723	0.00336853	0.0248173	0.0181294	TOP2A/AURKA/CCNB2/TRIP13	4
BP	GO:0060441	epithelial tube branching involved in lung morphogenesis	4/406	29/18723	0.00336853	0.0248173	0.0181294	HOXA5/RDH10/SPRY1/TNC	4
BP	GO:0071549	cellular response to dexamethasone stimulus	4/406	29/18723	0.00336853	0.0248173	0.0181294	SERPINF1/EGFR/AQP1/ICAM1	4
BP	GO:0090025	regulation of monocyte chemotaxis	4/406	29/18723	0.00336853	0.0248173	0.0181294	CXCL10/CCL5/SERPINE1/SLAMF8	4
BP	GO:0001774	microglial cell activation	5/406	47/18723	0.00339532	0.0249112	0.0181981	PTPRC/CTSC/C5AR1/TLR1/NAMPT	5
BP	GO:0010712	regulation of collagen metabolic process	5/406	47/18723	0.00339532	0.0249112	0.0181981	ITGA2/MFAP4/RUNX1/VIM/CIITA	5
BP	GO:0002286	T cell activation involved in immune response	8/406	114/18723	0.00340552	0.0249112	0.0181981	F2RL1/HLA-DRA/CD74/ANXA1/HLA-DRB1/FGL2/SLC11A1/ICAM1	8
BP	GO:0090100	positive regulation of transmembrane receptor protein serine/threonine kinase signaling pathway	8/406	114/18723	0.00340552	0.0249112	0.0181981	NPNT/GDF15/SLC2A10/CCN1/SULF1/THBS1/TGFB2/CRB2	8
BP	GO:0030177	positive regulation of Wnt signaling pathway	9/406	140/18723	0.00350634	0.0256031	0.0187035	COL1A1/CAV1/EGFR/SULF1/SFRP4/DKK1/LGR6/SFRP2/PLEKHA4	9
BP	GO:1901989	positive regulation of cell cycle phase transition	8/406	115/18723	0.00359272	0.0261873	0.0191303	UBE2C/ADAMTS1/FAM83D/EGFR/DTL/ANXA1/CDK1/CCNB1	8
BP	GO:0030336	negative regulation of cell migration	16/406	344/18723	0.00361118	0.0262753	0.0191946	SERPINF1/JAG1/CCL2/IGFBP3/TIMP1/COL3A1/ANGPT2/CYP1B1/SULF1/CD74/THBS1/SP100/SERPINE1/SLAMF8/GADD45A/SFRP2	16
BP	GO:0055006	cardiac cell development	7/406	91/18723	0.00363411	0.0263954	0.0192823	HAMP/JAG1/VEGFA/SPRY1/CDK1/ALPK3/CCNB1	7
BP	GO:0051146	striated muscle cell differentiation	14/406	283/18723	0.00367122	0.0266037	0.0194345	MYOF/HAMP/CAV2/PTGFRN/GDF15/VEGFA/CXCL10/SDC1/DKK1/CDK1/MMP14/ALPK3/CCNB1/ADAMTS15	14
BP	GO:0032355	response to estradiol	9/406	141/18723	0.00367572	0.0266037	0.0194345	COL1A1/EGFR/POSTN/CCNA2/TFPI/ITGA2/ANXA1/SOCS2/IGFBP2	9
BP	GO:2000241	regulation of reproductive process	10/406	168/18723	0.0037238	0.0268581	0.0196203	SERPINF1/TIMP1/VEGFA/RAD51AP1/LIF/SULF1/AURKA/PLAT/CDC20/TRIP13	10
BP	GO:1903053	regulation of extracellular matrix organization	5/406	48/18723	0.00372393	0.0268581	0.0196203	AEBP1/SLC2A10/HAS2/PDPN/RUNX1	5
BP	GO:0009263	deoxyribonucleotide biosynthetic process	3/406	15/18723	0.00379304	0.0271186	0.0198106	CMPK2/RRM2/TYMS	3
BP	GO:0051299	centrosome separation	3/406	15/18723	0.00379304	0.0271186	0.0198106	KIF11/NEK2/AURKA	3
BP	GO:0060099	regulation of phagocytosis, engulfment	3/406	15/18723	0.00379304	0.0271186	0.0198106	F2RL1/C3/ITGA2	3
BP	GO:0140374	antiviral innate immune response	3/406	15/18723	0.00379304	0.0271186	0.0198106	MX1/CXCL10/OAS1	3
BP	GO:2001279	regulation of unsaturated fatty acid biosynthetic process	3/406	15/18723	0.00379304	0.0271186	0.0198106	FABP5/CD74/ANXA1	3
BP	GO:0018105	peptidyl-serine phosphorylation	15/406	315/18723	0.00383449	0.0273673	0.0199923	CAV1/LATS2/AURKB/EGFR/VEGFA/CDK2/LIF/DKK1/AURKA/ANGPT1/GADD45A/SFRP2/CDK1/CCNB1/CD44	15
BP	GO:0002703	regulation of leukocyte mediated immunity	12/406	226/18723	0.003966	0.0282569	0.0206422	F2RL1/C3/CLCF1/PTPRC/IL13RA2/HLA-DRA/AHR/FOXJ1/RSAD2/HLA-DRB1/IL1R1/ICAM1	12
BP	GO:0030178	negative regulation of Wnt signaling pathway	10/406	170/18723	0.00404916	0.0287995	0.0210385	CAV1/LATS2/FZD6/SFRP4/DKK1/SFRP2/IGFBP2/EGR1/CTHRC1/DRAXIN	10
BP	GO:0046580	negative regulation of Ras protein signal transduction	5/406	49/18723	0.00407472	0.0288638	0.0210855	SPRY4/MET/TGFB2/SPRY1/ITGA3	5
BP	GO:0050832	defense response to fungus	5/406	49/18723	0.00407472	0.0288638	0.0210855	HAMP/S100A8/LTF/PLA2G5/S100A9	5
BP	GO:0002548	monocyte chemotaxis	6/406	70/18723	0.0040834	0.0288638	0.0210855	CCL2/CXCL10/CCL5/SERPINE1/SLAMF8/ANXA1	6
BP	GO:0007589	body fluid secretion	7/406	93/18723	0.00410032	0.0288638	0.0210855	CAV1/ANXA2/EGFR/VEGFA/OAS2/SOCS2/AQP1	7
BP	GO:0060349	bone morphogenesis	7/406	93/18723	0.00410032	0.0288638	0.0210855	COL1A1/SERPINH1/LTF/SFRP4/HAS2/SFRP2/MMP14	7
BP	GO:1901992	positive regulation of mitotic cell cycle phase transition	7/406	93/18723	0.00410032	0.0288638	0.0210855	UBE2C/ADAMTS1/EGFR/DTL/ANXA1/CDK1/CCNB1	7
BP	GO:0042129	regulation of T cell proliferation	10/406	171/18723	0.00422006	0.02959	0.021616	PTPRC/HLA-DPA1/VCAM1/FOXJ1/IRF1/CCL5/HLA-DPB1/ANXA1/IGFBP2/HLA-DRB1	10
BP	GO:0033135	regulation of peptidyl-serine phosphorylation	9/406	144/18723	0.00422263	0.02959	0.021616	CAV1/EGFR/VEGFA/LIF/DKK1/ANGPT1/GADD45A/SFRP2/CD44	9
BP	GO:0006323	DNA packaging	11/406	199/18723	0.00422509	0.02959	0.021616	CHAF1B/SMC4/TOP2A/OIP5/HJURP/NCAPG/NCAPH/ASF1B/NUSAP1/CDK1/CCNB1	11
BP	GO:0001516	prostaglandin biosynthetic process	4/406	31/18723	0.00431333	0.0301054	0.0219925	FABP5/PTGS1/CD74/ANXA1	4
BP	GO:0046457	prostanoid biosynthetic process	4/406	31/18723	0.00431333	0.0301054	0.0219925	FABP5/PTGS1/CD74/ANXA1	4
BP	GO:0010389	regulation of G2/M transition of mitotic cell cycle	7/406	94/18723	0.00434975	0.0302569	0.0221032	AURKB/CDK2/DTL/AURKA/CDK1/CCNB1/CENPF	7
BP	GO:0051702	biological process involved in interaction with symbiont	7/406	94/18723	0.00434975	0.0302569	0.0221032	F2RL1/CAV2/FN1/LTF/APOL1/CCL5/PTX3	7
BP	GO:0043524	negative regulation of neuron apoptotic process	9/406	145/18723	0.00441839	0.0306824	0.0224141	CLCF1/NDNF/SOD2/CCL2/C5AR1/ANGPT1/CRLF1/DRAXIN/MAG	9
BP	GO:0060425	lung morphogenesis	5/406	50/18723	0.00444848	0.0308393	0.0225287	HOXA5/LIF/RDH10/SPRY1/TNC	5
BP	GO:0002693	positive regulation of cellular extravasation	3/406	16/18723	0.00459395	0.0313716	0.0229175	IL1R1/ICAM1/PDGFD	3
BP	GO:0006206	pyrimidine nucleobase metabolic process	3/406	16/18723	0.00459395	0.0313716	0.0229175	DPYD/TYMS/TYMP	3
BP	GO:0051770	positive regulation of nitric-oxide synthase biosynthetic process	3/406	16/18723	0.00459395	0.0313716	0.0229175	CCL2/STAT1/NAMPT	3
BP	GO:0051969	regulation of transmission of nerve impulse	3/406	16/18723	0.00459395	0.0313716	0.0229175	ITGA2/TYMP/CARTPT	3
BP	GO:0071732	cellular response to nitric oxide	3/406	16/18723	0.00459395	0.0313716	0.0229175	CDK2/CCNA2/AQP1	3
BP	GO:0072109	glomerular mesangium development	3/406	16/18723	0.00459395	0.0313716	0.0229175	ACTA2/EGR1/PDGFD	3
BP	GO:1905153	regulation of membrane invagination	3/406	16/18723	0.00459395	0.0313716	0.0229175	F2RL1/C3/ITGA2	3
BP	GO:2000095	regulation of Wnt signaling pathway, planar cell polarity pathway	3/406	16/18723	0.00459395	0.0313716	0.0229175	DKK1/SFRP2/PLEKHA4	3
BP	GO:2001044	regulation of integrin-mediated signaling pathway	3/406	16/18723	0.00459395	0.0313716	0.0229175	TIMP1/SLC2A10/FLNA	3
BP	GO:0042326	negative regulation of phosphorylation	17/406	385/18723	0.00462636	0.0315406	0.023041	SOCS3/CAV1/PTPRC/LATS2/PBK/IGFBP3/SPRY4/NIBAN1/CD109/CDKN2C/DKK1/ANGPT1/GADD45A/SPRY1/PKIB/SFRP2/CCNB1	17
BP	GO:0071901	negative regulation of protein serine/threonine kinase activity	8/406	120/18723	0.00465109	0.0316566	0.0231257	CAV1/LATS2/SPRY4/CDKN2C/GADD45A/SPRY1/PKIB/SFRP2	8
BP	GO:0032729	positive regulation of interferon-gamma production	6/406	72/18723	0.0046936	0.0317358	0.0231836	F2RL1/HLA-DPA1/HLA-DPB1/IL1R1/SLC11A1/ISG15	6
BP	GO:0035567	non-canonical Wnt signaling pathway	6/406	72/18723	0.0046936	0.0317358	0.0231836	FZD6/SFRP4/DKK1/SFRP2/CTHRC1/PLEKHA4	6
BP	GO:0042246	tissue regeneration	6/406	72/18723	0.0046936	0.0317358	0.0231836	PTGFRN/POSTN/LGR6/ANXA1/RUNX1/CCNB1	6
BP	GO:1903036	positive regulation of response to wounding	6/406	72/18723	0.0046936	0.0317358	0.0231836	THBD/F3/THBS1/SERPINE1/ANXA1/FLNA	6
BP	GO:0019835	cytolysis	4/406	32/18723	0.00484648	0.0325554	0.0237823	C7/APOL1/PLA2G2A/LYZ	4
BP	GO:0035456	response to interferon-beta	4/406	32/18723	0.00484648	0.0325554	0.0237823	IRF1/PLSCR1/STAT1/OAS1	4
BP	GO:0060317	cardiac epithelial to mesenchymal transition	4/406	32/18723	0.00484648	0.0325554	0.0237823	JAG1/TGFB2/HAS2/SPRY1	4
BP	GO:0090022	regulation of neutrophil chemotaxis	4/406	32/18723	0.00484648	0.0325554	0.0237823	CXCL8/THBS4/C5AR1/CD74	4
BP	GO:0002718	regulation of cytokine production involved in immune response	7/406	96/18723	0.00488283	0.0326263	0.0238341	F2RL1/RSAD2/CD74/TGFB2/NR4A3/ANGPT1/IL1R1	7
BP	GO:0030510	regulation of BMP signaling pathway	7/406	96/18723	0.00488283	0.0326263	0.0238341	CCN1/SULF1/SFRP4/FSTL1/CRB2/SFRP2/ITGA3	7
BP	GO:0002224	toll-like receptor signaling pathway	8/406	121/18723	0.00488878	0.0326263	0.0238341	F2RL1/CAV1/LTF/RSAD2/TLR1/COLEC12/IRF1/OAS1	8
BP	GO:1904019	epithelial cell apoptotic process	8/406	121/18723	0.00488878	0.0326263	0.0238341	NDNF/CCL2/SFRP4/THBS1/CD248/SERPINE1/ANGPT1/ICAM1	8
BP	GO:0009636	response to toxic substance	13/406	262/18723	0.00490389	0.0326741	0.023869	PTGS1/FBLN5/SOD2/MBP/CYP1B1/AHR/ALOX5AP/TYMS/CCL5/SDC1/S100A9/CDK1/CCNB1	13
BP	GO:0008544	epidermis development	15/406	324/18723	0.00496123	0.0330026	0.024109	FABP5/FA2H/EMP1/JAG1/TNFRSF19/EGFR/FZD6/FOSL2/ST14/SFRP4/TGFB2/CD109/ANXA1/HLA-DRB1/USH1C	15
BP	GO:0060560	developmental growth involved in morphogenesis	12/406	234/18723	0.00521924	0.0346629	0.0253218	IQGAP1/SPP1/VEGFA/POSTN/FN1/AURKA/RDH10/SPRY1/SFRP2/DRAXIN/MAG/TNC	12
BP	GO:0031103	axon regeneration	5/406	52/18723	0.00526813	0.034796	0.0254191	SPP1/FLNA/FOLR1/MAG/TNC	5
BP	GO:0043277	apoptotic cell clearance	5/406	52/18723	0.00526813	0.034796	0.0254191	C3/CCL2/C2/THBS1/ANXA1	5
BP	GO:0060071	Wnt signaling pathway, planar cell polarity pathway	5/406	52/18723	0.00526813	0.034796	0.0254191	FZD6/DKK1/SFRP2/CTHRC1/PLEKHA4	5
BP	GO:0009411	response to UV	9/406	149/18723	0.00527314	0.034796	0.0254191	PBK/AURKB/EGFR/TIMP1/DTL/PCLAF/MMP9/MFAP4/AQP1	9
BP	GO:0043405	regulation of MAP kinase activity	10/406	177/18723	0.00536844	0.0353114	0.0257956	CAV1/IQGAP1/EGFR/SPRY4/VEGFA/THBS1/DKK1/SPRY1/SFRP2/PDGFD	10
BP	GO:0071453	cellular response to oxygen levels	10/406	177/18723	0.00536844	0.0353114	0.0257956	NDNF/CAV1/VASN/VEGFA/CCNA2/EGR1/NAMPT/AQP1/ICAM1/CCNB1	10
BP	GO:2000146	negative regulation of cell motility	16/406	359/18723	0.00542083	0.0353816	0.0258469	SERPINF1/JAG1/CCL2/IGFBP3/TIMP1/COL3A1/ANGPT2/CYP1B1/SULF1/CD74/THBS1/SP100/SERPINE1/SLAMF8/GADD45A/SFRP2	16
BP	GO:0010165	response to X-ray	4/406	33/18723	0.00542213	0.0353816	0.0258469	THBD/HAMP/ANXA1/SFRP2	4
BP	GO:0040020	regulation of meiotic nuclear division	4/406	33/18723	0.00542213	0.0353816	0.0258469	RAD51AP1/LIF/CDC20/TRIP13	4
BP	GO:0048333	mesodermal cell differentiation	4/406	33/18723	0.00542213	0.0353816	0.0258469	ITGA2/DKK1/SFRP2/ITGA3	4
BP	GO:0071295	cellular response to vitamin	4/406	33/18723	0.00542213	0.0353816	0.0258469	COL1A1/POSTN/FOLR1/TNC	4
BP	GO:0002367	cytokine production involved in immune response	7/406	98/18723	0.00546364	0.0354836	0.0259214	F2RL1/RSAD2/CD74/TGFB2/NR4A3/ANGPT1/IL1R1	7
BP	GO:0032642	regulation of chemokine production	7/406	98/18723	0.00546364	0.0354836	0.0259214	F2RL1/MBP/POSTN/CD74/OAS3/EGR1/OAS1	7
BP	GO:0070206	protein trimerization	3/406	17/18723	0.00548956	0.0354836	0.0259214	COL1A2/ALOX5AP/CD74	3
BP	GO:0090713	immunological memory process	3/406	17/18723	0.00548956	0.0354836	0.0259214	HLA-DRA/HLA-DRB1/FGL2	3
BP	GO:1904355	positive regulation of telomere capping	3/406	17/18723	0.00548956	0.0354836	0.0259214	AURKB/NEK2/PKIB	3
BP	GO:2000696	regulation of epithelial cell differentiation involved in kidney development	3/406	17/18723	0.00548956	0.0354836	0.0259214	LIF/MMP9/STAT1	3
BP	GO:0070665	positive regulation of leukocyte proliferation	9/406	150/18723	0.0055056	0.0355314	0.0259563	CLCF1/PTPRC/HLA-DPA1/VCAM1/CD74/CCL5/HLA-DPB1/ANXA1/IGFBP2	9
BP	GO:0050679	positive regulation of epithelial cell proliferation	11/406	207/18723	0.00565992	0.0364701	0.0266421	F3/LAMC1/CAV2/THBS4/EGFR/VEGFA/C5AR1/HAS2/NR4A3/IQGAP3/LAMB1	11
BP	GO:0007566	embryo implantation	5/406	53/18723	0.0057156	0.0367712	0.026862	TIMP1/SPP1/VEGFA/LIF/MMP9	5
BP	GO:0034121	regulation of toll-like receptor signaling pathway	6/406	75/18723	0.00573114	0.0368136	0.026893	F2RL1/CAV1/LTF/RSAD2/TLR1/IRF1	6
BP	GO:0048511	rhythmic process	14/406	298/18723	0.00575778	0.0369271	0.0269759	TOP2A/SERPINF1/ADAMTS1/EGFR/AHR/DTL/TYMS/TGFB2/HAS2/PTX3/EGR1/CDK1/NAMPT/CARTPT	14
BP	GO:0032602	chemokine production	7/406	99/18723	0.00577275	0.0369654	0.0270038	F2RL1/MBP/POSTN/CD74/OAS3/EGR1/OAS1	7
BP	GO:1901215	negative regulation of neuron death	11/406	208/18723	0.00586341	0.0374875	0.0273853	CLCF1/NDNF/SERPINF1/SOD2/CCL2/C5AR1/NR4A3/ANGPT1/CRLF1/DRAXIN/MAG	11
BP	GO:2000027	regulation of animal organ morphogenesis	8/406	125/18723	0.00593383	0.0378789	0.0276712	VEGFA/FZD6/SULF1/DKK1/SPRY1/SFRP2/CTHRC1/PLEKHA4	8
BP	GO:0010721	negative regulation of cell development	10/406	180/18723	0.00602757	0.0383888	0.0280437	SPRY4/SPP1/VEGFA/POSTN/LTF/S1PR3/GBP1/NKX6-2/DRAXIN/MAG	10
BP	GO:0009112	nucleobase metabolic process	4/406	34/18723	0.00604173	0.0383888	0.0280437	DPYD/TTR/TYMS/TYMP	4
BP	GO:2000352	negative regulation of endothelial cell apoptotic process	4/406	34/18723	0.00604173	0.0383888	0.0280437	NDNF/SERPINE1/ANGPT1/ICAM1	4
BP	GO:0001937	negative regulation of endothelial cell proliferation	6/406	76/18723	0.00611151	0.0386529	0.0282366	CAV1/CAV2/CCL2/SULF1/THBS1/STAT1	6
BP	GO:0014823	response to activity	6/406	76/18723	0.00611151	0.0386529	0.0282366	SOD2/POSTN/ANGPT2/COL4A2/ITGA2/CDK1	6
BP	GO:0045685	regulation of glial cell differentiation	6/406	76/18723	0.00611151	0.0386529	0.0282366	OPALIN/CLCF1/LIF/CDK1/NKX6-2/MAG	6
BP	GO:0042102	positive regulation of T cell proliferation	7/406	101/18723	0.00642996	0.0405639	0.0296326	PTPRC/HLA-DPA1/VCAM1/CCL5/HLA-DPB1/ANXA1/IGFBP2	7
BP	GO:0006957	complement activation, alternative pathway	3/406	18/18723	0.00648272	0.0405639	0.0296326	C3/C7/CFH	3
BP	GO:0060008	Sertoli cell differentiation	3/406	18/18723	0.00648272	0.0405639	0.0296326	SDC1/FLNA/ICAM1	3
BP	GO:0060602	branch elongation of an epithelium	3/406	18/18723	0.00648272	0.0405639	0.0296326	RDH10/SPRY1/TNC	3
BP	GO:0060749	mammary gland alveolus development	3/406	18/18723	0.00648272	0.0405639	0.0296326	VEGFA/HOXA5/SOCS2	3
BP	GO:0061377	mammary gland lobule development	3/406	18/18723	0.00648272	0.0405639	0.0296326	VEGFA/HOXA5/SOCS2	3
BP	GO:1902170	cellular response to reactive nitrogen species	3/406	18/18723	0.00648272	0.0405639	0.0296326	CDK2/CCNA2/AQP1	3
BP	GO:0048565	digestive tract development	8/406	127/18723	0.00651611	0.0407108	0.02974	CXCL8/EGFR/HOXA5/TYMS/TGFB2/CCKBR/SFRP2/CCNB1	8
BP	GO:0097421	liver regeneration	4/406	35/18723	0.00670667	0.0418378	0.0305632	HAMP/EGFR/TYMS/AURKA	4
BP	GO:0043523	regulation of neuron apoptotic process	11/406	212/18723	0.00673559	0.0419546	0.0306486	CLCF1/NDNF/SOD2/CCL2/MYBL2/C5AR1/TGFB2/ANGPT1/CRLF1/DRAXIN/MAG	11
BP	GO:1902749	regulation of cell cycle G2/M phase transition	7/406	102/18723	0.0067787	0.0421592	0.0307981	AURKB/CDK2/DTL/AURKA/CDK1/CCNB1/CENPF	7
BP	GO:0070373	negative regulation of ERK1 and ERK2 cascade	6/406	78/18723	0.00692687	0.0430156	0.0314237	PTPRC/SPRY4/LIF/ATF3/SPRY1/GBP1	6
BP	GO:0055001	muscle cell development	10/406	184/18723	0.00700261	0.0434204	0.0317194	FLNC/MYOF/HAMP/CAV2/ACTN1/VEGFA/SDC1/CDK1/ALPK3/CCNB1	10
BP	GO:0007498	mesoderm development	8/406	129/18723	0.00714067	0.0440428	0.032174	SECTM1/VEGFA/MEST/ITGA2/DKK1/CRB2/SFRP2/ITGA3	8
BP	GO:0002090	regulation of receptor internalization	5/406	56/18723	0.00721785	0.0440428	0.032174	VEGFA/SFRP4/DKK1/ANGPT1/ARC	5
BP	GO:0002711	positive regulation of T cell mediated immunity	5/406	56/18723	0.00721785	0.0440428	0.032174	PTPRC/HLA-DRA/RSAD2/HLA-DRB1/IL1R1	5
BP	GO:0010518	positive regulation of phospholipase activity	5/406	56/18723	0.00721785	0.0440428	0.032174	EGFR/CCN1/C5AR1/PLA2G5/CCL5	5
BP	GO:0032608	interferon-beta production	5/406	56/18723	0.00721785	0.0440428	0.032174	OAS2/IRF1/OAS3/OAS1/ISG15	5
BP	GO:0032648	regulation of interferon-beta production	5/406	56/18723	0.00721785	0.0440428	0.032174	OAS2/IRF1/OAS3/OAS1/ISG15	5
BP	GO:0048008	platelet-derived growth factor receptor signaling pathway	5/406	56/18723	0.00721785	0.0440428	0.032174	F3/VEGFA/NR4A3/PLAT/PDGFD	5
BP	GO:0051058	negative regulation of small GTPase mediated signal transduction	5/406	56/18723	0.00721785	0.0440428	0.032174	SPRY4/MET/TGFB2/SPRY1/ITGA3	5
BP	GO:0071385	cellular response to glucocorticoid stimulus	5/406	56/18723	0.00721785	0.0440428	0.032174	SERPINF1/EGFR/ANXA1/AQP1/ICAM1	5
BP	GO:0090175	regulation of establishment of planar polarity	5/406	56/18723	0.00721785	0.0440428	0.032174	FZD6/DKK1/SFRP2/CTHRC1/PLEKHA4	5
BP	GO:0051051	negative regulation of transport	19/406	470/18723	0.00722083	0.0440428	0.032174	FABP5/HAMP/CAV1/SLN/IL13RA2/GEM/LIF/RSAD2/CD74/SFRP4/THBS1/SP100/MMP9/ANGPT1/PLSCR1/ANXA1/TRH/CARTPT/ICAM1	19
BP	GO:0014068	positive regulation of phosphatidylinositol 3-kinase signaling	6/406	79/18723	0.00736281	0.0448422	0.032758	F2RL1/FN1/CCL5/TGFB2/ANGPT1/PDGFD	6
BP	GO:0030224	monocyte differentiation	4/406	36/18723	0.0074183	0.0450467	0.0329074	VEGFA/CD74/CDK6/HLA-DRB1	4
BP	GO:0042119	neutrophil activation	4/406	36/18723	0.0074183	0.0450467	0.0329074	F2RL1/CXCL8/CCL5/PLA2G2A	4
BP	GO:0042476	odontogenesis	8/406	130/18723	0.00746939	0.0452901	0.0330852	COL1A1/COL1A2/TGFB2/SDC1/SERPINE1/AQP1/LAMB1/TNC	8
BP	GO:0045621	positive regulation of lymphocyte differentiation	7/406	104/18723	0.00751809	0.0454005	0.0331659	PTPRC/HLA-DRA/CD74/ANXA1/RUNX1/MMP14/HLA-DRB1	7
BP	GO:0002523	leukocyte migration involved in inflammatory response	3/406	19/18723	0.00757595	0.0454005	0.0331659	S100A8/SLAMF8/S100A9	3
BP	GO:0010744	positive regulation of macrophage derived foam cell differentiation	3/406	19/18723	0.00757595	0.0454005	0.0331659	MSR1/PLA2G5/PLA2G2A	3
BP	GO:0010759	positive regulation of macrophage chemotaxis	3/406	19/18723	0.00757595	0.0454005	0.0331659	C5AR1/THBS1/CCL5	3
BP	GO:0034501	protein localization to kinetochore	3/406	19/18723	0.00757595	0.0454005	0.0331659	AURKB/NDC80/CDK1	3
BP	GO:0045091	regulation of single stranded viral RNA replication via double stranded DNA intermediate	3/406	19/18723	0.00757595	0.0454005	0.0331659	CXCL8/TOP2A/APOBEC3C	3
BP	GO:0046794	transport of virus	3/406	19/18723	0.00757595	0.0454005	0.0331659	CAV1/CAV2/SIGLEC1	3
BP	GO:1903083	protein localization to condensed chromosome	3/406	19/18723	0.00757595	0.0454005	0.0331659	AURKB/NDC80/CDK1	3
BP	GO:0003007	heart morphogenesis	12/406	246/18723	0.00767021	0.0458984	0.0335296	JAG1/ADAMTS1/VEGFA/CCN1/TGFB2/HAS2/DKK1/COL5A1/SPRY1/SFRP2/FLNA/FOLR1	12
BP	GO:0007422	peripheral nervous system development	6/406	80/18723	0.00781822	0.0466484	0.0340775	HAPLN2/FA2H/HOXD9/LAMA2/RUNX1/CDK1	6
BP	GO:0071229	cellular response to acid chemical	6/406	80/18723	0.00781822	0.0466484	0.0340775	COL5A2/COL1A1/COL1A2/VEGFA/COL4A1/PDGFD	6
BP	GO:0030098	lymphocyte differentiation	16/406	374/18723	0.00790719	0.0471108	0.0344153	CLCF1/PTPRC/VCAM1/HLA-DOA/HLA-DRA/FOXJ1/RSAD2/CD74/IRF1/SLAMF8/ANXA1/RUNX1/EGR1/MMP14/HLA-DRB1/FGL2	16
BP	GO:0045936	negative regulation of phosphate metabolic process	18/406	441/18723	0.00800875	0.0476469	0.0348069	SOCS3/CAV1/PTPRC/LATS2/PBK/IGFBP3/SPRY4/NIBAN1/TGFB2/CD109/CDKN2C/DKK1/ANGPT1/GADD45A/SPRY1/PKIB/SFRP2/CCNB1	18
BP	GO:0150063	visual system development	16/406	375/18723	0.00810094	0.0481257	0.0351567	C3/COL5A2/SERPINF1/JAG1/FREM2/VEGFA/CYP1B1/TGFB2/RDH10/COL5A1/COL4A1/SPRY1/CRB2/VIM/USH1C/COL8A2	16
BP	GO:0045667	regulation of osteoblast differentiation	8/406	132/18723	0.00816088	0.0482813	0.0352703	NPNT/JAG1/CCN1/LTF/CDK6/CLIC1/SFRP2/CTHRC1	8
BP	GO:0002263	cell activation involved in immune response	13/406	279/18723	0.00816236	0.0482813	0.0352703	F2RL1/CLCF1/PTPRC/IL13RA2/HLA-DRA/TCIM/CD74/NR4A3/ANXA1/HLA-DRB1/FGL2/SLC11A1/ICAM1	13
BP	GO:0043542	endothelial cell migration	13/406	279/18723	0.00816236	0.0482813	0.0352703	SERPINF1/VEGFA/MET/ANGPT2/CYP1B1/LOXL2/THBS1/SP100/FSTL1/ANGPT1/GADD45A/ANXA1/SRPX2	13
BP	GO:0040036	regulation of fibroblast growth factor receptor signaling pathway	4/406	37/18723	0.00817793	0.0482912	0.0352776	SPRY4/SULF1/THBS1/SPRY1	4
BP	GO:0010563	negative regulation of phosphorus metabolic process	18/406	442/18723	0.00818754	0.0482912	0.0352776	SOCS3/CAV1/PTPRC/LATS2/PBK/IGFBP3/SPRY4/NIBAN1/TGFB2/CD109/CDKN2C/DKK1/ANGPT1/GADD45A/SPRY1/PKIB/SFRP2/CCNB1	18
BP	GO:0006906	vesicle fusion	7/406	106/18723	0.00831547	0.0489054	0.0357263	RUBCNL/CAV2/ANXA2/SAMD9/PLA2G5/ANXA1/RAB34	7
BP	GO:0090263	positive regulation of canonical Wnt signaling pathway	7/406	106/18723	0.00831547	0.0489054	0.0357263	COL1A1/CAV1/EGFR/SFRP4/LGR6/SFRP2/PLEKHA4	7
BP	GO:0006826	iron ion transport	5/406	58/18723	0.00836013	0.0490978	0.0358668	HAMP/STEAP3/LTF/SLC11A1/CP	5
CC	GO:0062023	collagen-containing extracellular matrix	67/417	425/19550	1.02e-38	3.51e-36	2.46e-36	MXRA5/COL5A2/F3/COL1A1/AEBP1/LAMC1/NPNT/SERPINF1/LTBP1/FBLN5/SNORC/S100A4/ANXA2/ADAMTS1/EMILIN2/LAMA2/THBS4/GDF15/SERPINH1/FREM2/SERPINA1/COL1A2/TIMP1/ADAM19/POSTN/FMOD/COL3A1/F13A1/ANGPT2/CCN1/LUM/S100A8/COL6A2/COL14A1/CTSC/NID2/FN1/LOXL2/EMILIN3/SULF1/COL4A2/THBS1/TGFB2/OGN/MMP9/SERPINE1/ANGPT1/PLSCR1/COL5A1/COL4A1/S100A9/MFAP4/ANXA1/SFRP2/HSPG2/P3H2/FGL2/CTHRC1/COL8A2/MGP/SERPING1/ICAM1/LAMB1/…	67
CC	GO:0042613	MHC class II protein complex	11/417	17/19550	4.03e-15	6.92e-13	4.85e-13	HLA-DPA1/HLA-DQB1/HLA-DOA/HLA-DQA2/HLA-DRA/CD74/HLA-DPB1/HLA-DRB5/HLA-DRB1/HLA-DQB2/HLA-DQA1	11
CC	GO:0005604	basement membrane	20/417	96/19550	1.18e-14	1.35e-12	9.49e-13	LAMC1/NPNT/SERPINF1/ANXA2/ADAMTS1/LAMA2/THBS4/FREM2/TIMP1/NID2/FN1/LOXL2/COL4A2/COL5A1/COL4A1/HSPG2/P3H2/COL8A2/LAMB1/TNC	20
CC	GO:0005788	endoplasmic reticulum lumen	32/417	313/19550	2.33e-13	2e-11	1.4e-11	C3/COL5A2/COL1A1/LAMC1/LTBP1/PLAUR/IGFBP3/SERPINH1/SERPINA1/COL1A2/TIMP1/SPP1/COL3A1/CCN1/COL6A2/COL14A1/CTSC/FN1/PRSS23/APOL1/COL4A2/THBS1/FSTL1/COL5A1/COL4A1/P3H2/COL8A2/SERPING1/LAMB1/PDGFD/CP/TNC	32
CC	GO:0042611	MHC protein complex	11/417	25/19550	1.24e-12	8.55e-11	5.99e-11	HLA-DPA1/HLA-DQB1/HLA-DOA/HLA-DQA2/HLA-DRA/CD74/HLA-DPB1/HLA-DRB5/HLA-DRB1/HLA-DQB2/HLA-DQA1	11
CC	GO:0071556	integral component of lumenal side of endoplasmic reticulum membrane	10/417	29/19550	2.44e-10	1.2e-08	8.41e-09	HLA-DPA1/HLA-DQB1/HLA-DQA2/HLA-DRA/CD74/HLA-DPB1/HLA-DRB5/HLA-DRB1/HLA-DQB2/HLA-DQA1	10
CC	GO:0098553	lumenal side of endoplasmic reticulum membrane	10/417	29/19550	2.44e-10	1.2e-08	8.41e-09	HLA-DPA1/HLA-DQB1/HLA-DQA2/HLA-DRA/CD74/HLA-DPB1/HLA-DRB5/HLA-DRB1/HLA-DQB2/HLA-DQA1	10
CC	GO:0005581	collagen trimer	15/417	87/19550	4.35e-10	1.87e-08	1.31e-08	COL5A2/COL1A1/MSR1/EMILIN2/COL1A2/COL3A1/LUM/COL6A2/COL14A1/COL4A2/COLEC12/COL5A1/COL4A1/CTHRC1/COL8A2	15
CC	GO:0031983	vesicle lumen	27/417	327/19550	2.25e-09	8.59e-08	6.02e-08	FABP5/C3/CHI3L1/ACTN1/ANXA2/TTR/S100A11/EGFR/SERPINA1/TIMP1/VEGFA/F13A1/S100A8/CTSC/FN1/LTF/THBS1/TGFB2/CXCL1/PYGL/SERPINE1/S100A9/RNASE2/PTX3/PROS1/SERPING1/LYZ	27
CC	GO:0098576	lumenal side of membrane	10/417	36/19550	2.71e-09	9.33e-08	6.54e-08	HLA-DPA1/HLA-DQB1/HLA-DQA2/HLA-DRA/CD74/HLA-DPB1/HLA-DRB5/HLA-DRB1/HLA-DQB2/HLA-DQA1	10
CC	GO:0098644	complex of collagen trimers	8/417	21/19550	6.4e-09	2e-07	1.4e-07	COL5A2/COL1A1/COL1A2/COL3A1/LUM/COL4A2/COL5A1/COL4A1	8
CC	GO:0034774	secretory granule lumen	26/417	322/19550	7.14e-09	2.05e-07	1.43e-07	FABP5/C3/CHI3L1/ACTN1/ANXA2/TTR/S100A11/SERPINA1/TIMP1/VEGFA/F13A1/S100A8/CTSC/FN1/LTF/THBS1/TGFB2/CXCL1/PYGL/SERPINE1/S100A9/RNASE2/PTX3/PROS1/SERPING1/LYZ	26
CC	GO:0060205	cytoplasmic vesicle lumen	26/417	325/19550	8.65e-09	2.29e-07	1.6e-07	FABP5/C3/CHI3L1/ACTN1/ANXA2/TTR/S100A11/SERPINA1/TIMP1/VEGFA/F13A1/S100A8/CTSC/FN1/LTF/THBS1/TGFB2/CXCL1/PYGL/SERPINE1/S100A9/RNASE2/PTX3/PROS1/SERPING1/LYZ	26
CC	GO:0005819	spindle	28/417	391/19550	2.57e-08	6.31e-07	4.42e-07	KIF15/KIF11/ECT2/SHCBP1/LATS2/CDCA8/FAM83D/KIF2C/AURKB/NEK2/GEM/KIF20A/KIFC1/TACC3/BUB1B/AURKA/SKA3/PLK4/PRC1/NUSAP1/TPX2/CDK1/CDC20/KIF18B/BIRC5/CCNB1/KIF4A/CENPF	28
CC	GO:0000775	chromosome, centromeric region	19/417	198/19550	5.24e-08	1.2e-06	8.42e-07	CENPU/SMC4/TOP2A/SGO2/CDCA8/KIF2C/OIP5/AURKB/HJURP/NEK2/NCAPG/NUF2/BUB1B/BUB1/NDC80/SKA3/BIRC5/CCNB1/CENPF	19
CC	GO:0012507	ER to Golgi transport vesicle membrane	11/417	62/19550	6.97e-08	1.44e-06	1.01e-06	HLA-DPA1/HLA-DQB1/HLA-DQA2/HLA-DRA/CD74/HLA-DPB1/HLA-DRB5/HLA-DRB1/HLA-DQB2/FOLR1/HLA-DQA1	11
CC	GO:0005583	fibrillar collagen trimer	6/417	12/19550	7.53e-08	1.44e-06	1.01e-06	COL5A2/COL1A1/COL1A2/COL3A1/LUM/COL5A1	6
CC	GO:0098643	banded collagen fibril	6/417	12/19550	7.53e-08	1.44e-06	1.01e-06	COL5A2/COL1A1/COL1A2/COL3A1/LUM/COL5A1	6
CC	GO:0030134	COPII-coated ER to Golgi transport vesicle	13/417	94/19550	9.89e-08	1.79e-06	1.25e-06	HLA-DPA1/HLA-DQB1/SERPINA1/HLA-DQA2/HLA-DRA/CTSC/CD74/HLA-DPB1/HLA-DRB5/HLA-DRB1/HLA-DQB2/FOLR1/HLA-DQA1	13
CC	GO:0031093	platelet alpha granule lumen	11/417	67/19550	1.6e-07	2.76e-06	1.93e-06	ACTN1/SERPINA1/TIMP1/VEGFA/F13A1/FN1/THBS1/TGFB2/SERPINE1/PROS1/SERPING1	11
CC	GO:0030666	endocytic vesicle membrane	18/417	193/19550	1.81e-07	2.97e-06	2.08e-06	CD163/CAV1/MSR1/HLA-DPA1/HLA-DQB1/EGFR/HLA-DQA2/HLA-DRA/CD74/TLR1/COLEC12/HLA-DPB1/RAB34/HLA-DRB5/HLA-DRB1/HLA-DQB2/SLC11A1/HLA-DQA1	18
CC	GO:0030669	clathrin-coated endocytic vesicle membrane	11/417	72/19550	3.43e-07	5.36e-06	3.75e-06	HLA-DPA1/HLA-DQB1/EGFR/HLA-DQA2/HLA-DRA/CD74/HLA-DPB1/HLA-DRB5/HLA-DRB1/HLA-DQB2/HLA-DQA1	11
CC	GO:0000779	condensed chromosome, centromeric region	15/417	144/19550	4.66e-07	6.98e-06	4.89e-06	CENPU/SGO2/KIF2C/AURKB/HJURP/NEK2/NCAPG/NUF2/BUB1B/BUB1/NDC80/SKA3/BIRC5/CCNB1/CENPF	15
CC	GO:0031091	platelet alpha granule	12/417	91/19550	5.23e-07	7.49e-06	5.25e-06	ACTN1/SERPINA1/TIMP1/VEGFA/F13A1/FN1/THBS1/TGFB2/CD109/SERPINE1/PROS1/SERPING1	12
CC	GO:0000776	kinetochore	14/417	134/19550	1.09e-06	1.49e-05	1.05e-05	CENPU/SGO2/KIF2C/AURKB/HJURP/NEK2/NUF2/BUB1B/BUB1/NDC80/SKA3/BIRC5/CCNB1/CENPF	14
CC	GO:0005925	focal adhesion	26/417	418/19550	1.23e-06	1.63e-05	1.14e-05	FLNC/CAV1/PTPRC/CAV2/ACTN1/IQGAP1/PLAUR/CAPN5/MRC2/EGFR/SPRY4/ITGA5/ITGA2/FBLIM1/PDLIM1/PLAU/ANXA1/HSPG2/MMP14/VIM/FLNA/MSN/ICAM1/CD44/ITGA3/TNC	26
CC	GO:0030055	cell-substrate junction	26/417	425/19550	1.67e-06	2.13e-05	1.49e-05	FLNC/CAV1/PTPRC/CAV2/ACTN1/IQGAP1/PLAUR/CAPN5/MRC2/EGFR/SPRY4/ITGA5/ITGA2/FBLIM1/PDLIM1/PLAU/ANXA1/HSPG2/MMP14/VIM/FLNA/MSN/ICAM1/CD44/ITGA3/TNC	26
CC	GO:0000940	outer kinetochore	5/417	12/19550	3.02e-06	3.71e-05	2.6e-05	BUB1B/NDC80/SKA3/CCNB1/CENPF	5
CC	GO:0030139	endocytic vesicle	22/417	336/19550	3.6e-06	4.26e-05	2.99e-05	CD163/CAV1/MSR1/HLA-DPA1/HLA-DQB1/EGFR/HLA-DQA2/HLA-DRA/LTF/SAA1/PLA2G5/CD74/TLR1/COLEC12/HLA-DPB1/RAB34/HLA-DRB5/VIM/HLA-DRB1/HLA-DQB2/SLC11A1/HLA-DQA1	22
CC	GO:0045334	clathrin-coated endocytic vesicle	11/417	91/19550	3.73e-06	4.28e-05	3e-05	HLA-DPA1/HLA-DQB1/EGFR/HLA-DQA2/HLA-DRA/CD74/HLA-DPB1/HLA-DRB5/HLA-DRB1/HLA-DQB2/HLA-DQA1	11
CC	GO:0098687	chromosomal region	22/417	348/19550	6.31e-06	7e-05	4.91e-05	CENPU/SMC4/TOP2A/SGO2/CDCA8/KIF2C/OIP5/AURKB/HJURP/NEK2/RAD51AP1/NCAPG/NUF2/BUB1B/BUB1/NDC80/SP100/SKA3/CDK1/BIRC5/CCNB1/CENPF	22
CC	GO:0032588	trans-Golgi network membrane	11/417	100/19550	9.41e-06	9.91e-05	6.95e-05	HLA-DPA1/HLA-DQB1/HLA-DQA2/HLA-DRA/CD74/HLA-DPB1/LGR6/HLA-DRB5/HLA-DRB1/HLA-DQB2/HLA-DQA1	11
CC	GO:0072686	mitotic spindle	14/417	161/19550	9.51e-06	9.91e-05	6.95e-05	KIF11/ECT2/FAM83D/AURKB/GEM/KIFC1/TACC3/AURKA/SKA3/PRC1/NUSAP1/TPX2/CDK1/KIF18B	14
CC	GO:0009897	external side of plasma membrane	24/417	421/19550	1.38e-05	0.000139153	9.75e-05	THBD/F3/CD163/PTPRC/OSMR/MSR1/VCAM1/IL13RA2/CD302/FCGR3A/CD22/CD74/THBS1/ITGA2/CXCL10/SDC1/CD248/ANXA1/CRLF1/HLA-DRB1/IL1R1/FOLR1/ICAM1/ITGA3	24
CC	GO:0072562	blood microparticle	13/417	146/19550	1.53e-05	0.000150428	0.00010541	C3/F13A1/FN1/APOL1/C1RL/C1R/CLIC1/CFH/PROS1/C1S/MSN/SERPING1/CP	13
CC	GO:0000793	condensed chromosome	17/417	244/19550	2.08e-05	0.000196919	0.000137988	CENPU/MKI67/TOP2A/SGO2/KIF2C/AURKB/HJURP/NEK2/NCAPG/NUF2/BUB1B/BUB1/NDC80/SKA3/BIRC5/CCNB1/CENPF	17
CC	GO:0030496	midbody	15/417	196/19550	2.14e-05	0.000196919	0.000137988	ECT2/SHCBP1/CDCA8/ANXA2/IQGAP1/AURKB/NEK2/GEM/KIF20A/AURKA/PRC1/CDK1/BIRC5/KIF4A/CENPF	15
CC	GO:0005876	spindle microtubule	9/417	72/19550	2.18e-05	0.000196919	0.000137988	KIF11/AURKB/AURKA/SKA3/PRC1/CDK1/KIF18B/BIRC5/KIF4A	9
CC	GO:0030665	clathrin-coated vesicle membrane	11/417	116/19550	3.85e-05	0.000339668	0.000238017	HLA-DPA1/HLA-DQB1/EGFR/HLA-DQA2/HLA-DRA/CD74/HLA-DPB1/HLA-DRB5/HLA-DRB1/HLA-DQB2/HLA-DQA1	11
CC	GO:0005874	microtubule	23/417	429/19550	5.38e-05	0.000462631	0.000324181	KIF15/GTSE1/KIF11/TUBA1C/TEKT1/IQGAP1/KIF2C/TUBB6/AURKB/NEK2/KIF20A/KIFC1/MX1/SAA1/AURKA/SKA3/PRC1/NUSAP1/TPX2/CDK1/KIF18B/BIRC5/KIF4A	23
CC	GO:0000922	spindle pole	13/417	170/19550	7.56e-05	0.000634672	0.000444736	KIF11/LATS2/FAM83D/AURKB/NEK2/TACC3/AURKA/PLK4/PRC1/TPX2/CDC20/CCNB1/CENPF	13
CC	GO:0005775	vacuolar lumen	13/417	174/19550	9.59e-05	0.000785112	0.000550155	FABP5/C3/ANXA2/TTR/FMOD/LUM/CTSC/CD74/SDC1/OGN/RNASE2/HSPG2/LYZ	13
CC	GO:0051233	spindle midzone	6/417	36/19550	0.000102884	0.00082307	0.000576754	CDCA8/AURKB/GEM/AURKA/PRC1/KIF18B	6
CC	GO:0045121	membrane raft	19/417	335/19550	0.00011518	0.000880485	0.000616986	MYOF/MAL/CAV1/PTPRC/CAV2/ANXA2/IQGAP1/SERPINH1/EGFR/TFPI/SULF1/TLR1/HAS2/ANGPT1/PLSCR1/PDPN/ARC/MAG/ICAM1	19
CC	GO:0098857	membrane microdomain	19/417	335/19550	0.00011518	0.000880485	0.000616986	MYOF/MAL/CAV1/PTPRC/CAV2/ANXA2/IQGAP1/SERPINH1/EGFR/TFPI/SULF1/TLR1/HAS2/ANGPT1/PLSCR1/PDPN/ARC/MAG/ICAM1	19
CC	GO:0030667	secretory granule membrane	18/417	311/19550	0.00013471	0.00100739	0.000705915	FABP5/CAV1/PTPRC/CAV2/IQGAP2/IQGAP1/PLAUR/C5AR1/GLIPR1/FPR1/CD109/FCGR2A/PLAU/CD58/SLC11A1/CD93/CD44/MOXD1	18
CC	GO:0042383	sarcolemma	11/417	138/19550	0.000185628	0.00135864	0.000952045	FLNC/SYNC/CAV1/CAV2/ANXA2/LAMA2/VCAM1/COL6A2/DES/ANXA1/AQP1	11
CC	GO:0000307	cyclin-dependent protein kinase holoenzyme complex	6/417	42/19550	0.000248758	0.00178277	0.00124924	CDK2/CCNA2/CDK6/CCNB2/CDK1/CCNB1	6
CC	GO:0005802	trans-Golgi network	15/417	259/19550	0.000475739	0.00333988	0.00234037	HLA-DPA1/PIFO/MS4A6A/HLA-DQB1/HLA-DQA2/HLA-DRA/POSTN/CD74/HLA-DPB1/LGR6/HLA-DRB5/FLNA/HLA-DRB1/HLA-DQB2/HLA-DQA1	15
CC	GO:0030662	coated vesicle membrane	12/417	181/19550	0.000527887	0.00363186	0.00254497	HLA-DPA1/HLA-DQB1/EGFR/HLA-DQA2/HLA-DRA/CD74/HLA-DPB1/HLA-DRB5/HLA-DRB1/HLA-DQB2/FOLR1/HLA-DQA1	12
CC	GO:0005871	kinesin complex	6/417	50/19550	0.00065288	0.00440374	0.00308585	KIF15/KIF11/KIF2C/KIF20A/KIFC1/KIF18B	6
CC	GO:0005875	microtubule associated complex	11/417	161/19550	0.000695174	0.00459884	0.00322257	KIF15/KIF11/CDCA8/KIF2C/AURKB/KIF20A/KIFC1/ACTA2/AURKA/KIF18B/BIRC5	11
CC	GO:0005902	microvillus	8/417	91/19550	0.000727124	0.00471945	0.00330708	IQGAP2/VCAM1/CD302/ANGPT1/PDPN/MSN/USH1C/CD44	8
CC	GO:0070820	tertiary granule	11/417	164/19550	0.000810097	0.00516062	0.00361622	TNFAIP6/LTF/FPR1/CXCL1/MMP9/PLAU/PTX3/CD58/SLC11A1/CD93/LYZ	11
CC	GO:0030136	clathrin-coated vesicle	12/417	196/19550	0.00106294	0.00664819	0.00465861	HLA-DPA1/HLA-DQB1/EGFR/HLA-DQA2/HLA-DRA/CD74/HLA-DPB1/HLA-DRB5/HLA-DRB1/HLA-DQB2/FOLR1/HLA-DQA1	12
CC	GO:1904724	tertiary granule lumen	6/417	55/19550	0.00108922	0.0066909	0.00468855	TNFAIP6/LTF/CXCL1/MMP9/PTX3/LYZ	6
CC	GO:0045177	apical part of cell	20/417	435/19550	0.00114452	0.00690728	0.00484017	HAMP/MAL/JAG1/OSMR/TMEM235/VCAM1/EGFR/FZD6/C5AR1/FN1/PLAT/CRB2/PDPN/ANXA1/IGFBP2/MSN/USH1C/FOLR1/AQP1/CD44	20
CC	GO:0030175	filopodium	8/417	107/19550	0.00207802	0.0123248	0.00863644	ARL4C/IQGAP2/VCAM1/CD302/ACTA2/PDPN/MSN/ITGA3	8
CC	GO:0045120	pronucleus	3/417	13/19550	0.00234995	0.0137014	0.00960106	CCNA2/AURKA/CENPF	3
CC	GO:0045178	basal part of cell	14/417	276/19550	0.00253922	0.0144135	0.0101	ANXA2/EGFR/MET/ST14/C5AR1/ITGA2/ABCC3/PDPN/ANXA1/MSN/FOLR1/AQP1/CD44/ITGA3	14
CC	GO:0030176	integral component of endoplasmic reticulum membrane	10/417	162/19550	0.00255587	0.0144135	0.0101	HLA-DPA1/HLA-DQB1/HLA-DQA2/HLA-DRA/CD74/HLA-DPB1/HLA-DRB5/HLA-DRB1/HLA-DQB2/HLA-DQA1	10
CC	GO:0010369	chromocenter	3/417	14/19550	0.00294384	0.0158231	0.0110878	CDCA8/OIP5/AURKB	3
CC	GO:0043218	compact myelin	3/417	14/19550	0.00294384	0.0158231	0.0110878	ANXA2/MBP/MAG	3
CC	GO:1990023	mitotic spindle midzone	3/417	14/19550	0.00294384	0.0158231	0.0110878	AURKB/PRC1/KIF18B	3
CC	GO:0035578	azurophil granule lumen	7/417	91/19550	0.0033238	0.0175906	0.0123263	FABP5/C3/ANXA2/TTR/CTSC/RNASE2/LYZ	7
CC	GO:0031227	intrinsic component of endoplasmic reticulum membrane	10/417	170/19550	0.00361411	0.0187405	0.0131321	HLA-DPA1/HLA-DQB1/HLA-DQA2/HLA-DRA/CD74/HLA-DPB1/HLA-DRB5/HLA-DRB1/HLA-DQB2/HLA-DQA1	10
CC	GO:0009925	basal plasma membrane	13/417	257/19550	0.00365003	0.0187405	0.0131321	ANXA2/EGFR/MET/ST14/C5AR1/ABCC3/PDPN/ANXA1/MSN/FOLR1/AQP1/CD44/ITGA3	13
CC	GO:0098791	Golgi apparatus subcompartment	17/417	384/19550	0.00384414	0.0194468	0.0136271	HLA-DPA1/PIFO/MS4A6A/HLA-DQB1/HLA-DQA2/HLA-DRA/POSTN/SULF1/CD74/HLA-DPB1/LGR6/RAB34/HLA-DRB5/FLNA/HLA-DRB1/HLA-DQB2/HLA-DQA1	17
CC	GO:0016323	basolateral plasma membrane	12/417	231/19550	0.00415399	0.0207097	0.014512	ANXA2/EGFR/ST14/C5AR1/ABCC3/PDPN/ANXA1/MSN/FOLR1/AQP1/CD44/ITGA3	12
CC	GO:0001726	ruffle	10/417	178/19550	0.00499353	0.0245396	0.0171958	ACTN1/ANXA2/IQGAP1/S100A11/EGFR/SPRY4/ITGA5/CDK6/ARAP3/PDPN	10
CC	GO:0030135	coated vesicle	14/417	299/19550	0.00516057	0.0250033	0.0175207	HLA-DPA1/HLA-DQB1/EGFR/SERPINA1/HLA-DQA2/HLA-DRA/CTSC/CD74/HLA-DPB1/HLA-DRB5/HLA-DRB1/HLA-DQB2/FOLR1/HLA-DQA1	14
CC	GO:0030658	transport vesicle membrane	11/417	212/19550	0.00599173	0.0284155	0.0199117	HLA-DPA1/HLA-DQB1/HLA-DQA2/HLA-DRA/CD74/HLA-DPB1/HLA-DRB5/HLA-DRB1/HLA-DQB2/FOLR1/HLA-DQA1	11
CC	GO:0005766	primary lysosome	9/417	155/19550	0.00612866	0.0284155	0.0199117	FABP5/C3/ANXA2/TTR/CTSC/GLIPR1/FPR1/RNASE2/LYZ	9
CC	GO:0042582	azurophil granule	9/417	155/19550	0.00612866	0.0284155	0.0199117	FABP5/C3/ANXA2/TTR/CTSC/GLIPR1/FPR1/RNASE2/LYZ	9
CC	GO:0031143	pseudopodium	3/417	18/19550	0.00619524	0.0284155	0.0199117	F2RL1/ACTN1/MSN	3
CC	GO:0005796	Golgi lumen	7/417	104/19550	0.00690176	0.0312395	0.0218906	FMOD/LUM/SDC1/OGN/HSPG2/PROS1/MMP14	7
CC	GO:0005774	vacuolar membrane	18/417	444/19550	0.00731042	0.0326595	0.0228857	THBD/RUBCNL/ANXA2/HLA-DPA1/HLA-DQB1/VASN/HLA-DOA/HLA-DQA2/HLA-DRA/CD74/GLIPR1/FPR1/HLA-DPB1/HLA-DRB5/HLA-DRB1/HLA-DQB2/HLA-DQA1/CP	18
CC	GO:1902554	serine/threonine protein kinase complex	6/417	81/19550	0.00768481	0.033892	0.0237493	CDK2/CCNA2/CDK6/CCNB2/CDK1/CCNB1	6
CC	GO:0098858	actin-based cell projection	11/417	221/19550	0.00808863	0.0352214	0.0246808	ARL4C/IQGAP2/VCAM1/CD302/ACTA2/ANGPT1/PDPN/MSN/USH1C/CD44/ITGA3	11
CC	GO:0005680	anaphase-promoting complex	3/417	21/19550	0.00963199	0.0409062	0.0286644	UBE2C/BUB1B/CDC20	3
CC	GO:0016327	apicolateral plasma membrane	3/417	21/19550	0.00963199	0.0409062	0.0286644	THBD/FZD6/CRB2	3
CC	GO:0035580	specific granule lumen	5/417	62/19550	0.0103091	0.0432478	0.0303052	CHI3L1/LTF/CXCL1/PTX3/LYZ	5
CC	GO:0005765	lysosomal membrane	16/417	395/19550	0.0111536	0.0452164	0.0316847	ANXA2/HLA-DPA1/HLA-DQB1/VASN/HLA-DOA/HLA-DQA2/HLA-DRA/CD74/GLIPR1/FPR1/HLA-DPB1/HLA-DRB5/HLA-DRB1/HLA-DQB2/HLA-DQA1/CP	16
CC	GO:0098852	lytic vacuole membrane	16/417	395/19550	0.0111536	0.0452164	0.0316847	ANXA2/HLA-DPA1/HLA-DQB1/VASN/HLA-DOA/HLA-DQA2/HLA-DRA/CD74/GLIPR1/FPR1/HLA-DPB1/HLA-DRB5/HLA-DRB1/HLA-DQB2/HLA-DQA1/CP	16
CC	GO:0005884	actin filament	7/417	114/19550	0.0111727	0.0452164	0.0316847	ACTN1/GNG12/IQGAP1/PDLIM1/ANXA1/PDLIM4/FLNA	7
MF	GO:0005201	extracellular matrix structural constituent	37/413	172/18368	7.74e-26	4.5e-23	3.73e-23	MXRA5/CHI3L1/COL5A2/COL1A1/AEBP1/LAMC1/NPNT/LTBP1/FBLN5/EMILIN2/LAMA2/COL1A2/POSTN/FMOD/COL3A1/CCN1/LUM/COL6A2/COL14A1/NID2/FN1/EMILIN3/COL4A2/THBS1/OGN/COL5A1/COL4A1/MFAP4/HSPG2/FGL2/CTHRC1/COL8A2/MGP/LAMB1/PCOLCE/TNC/SRPX2	37
MF	GO:0005178	integrin binding	22/413	144/18368	1.28e-12	3.72e-10	3.08e-10	NPNT/FBLN5/ACTN1/THBS4/VCAM1/EGFR/SPP1/COL3A1/CCN1/FN1/THBS1/S1PR3/ITGA2/COL5A1/SFRP2/MMP14/IBSP/ECM2/ICAM1/LAMB1/ISG15/ITGA3	22
MF	GO:0032395	MHC class II receptor activity	8/413	10/18368	2.64e-12	5.13e-10	4.25e-10	HLA-DPA1/HLA-DQB1/HLA-DOA/HLA-DQA2/HLA-DRA/HLA-DRB1/HLA-DQB2/HLA-DQA1	8
MF	GO:0023026	MHC class II protein complex binding	11/413	27/18368	6.14e-12	8.93e-10	7.4e-10	HLA-DPA1/HLA-DQB1/HLA-DOA/HLA-DQA2/HLA-DRA/CD74/HLA-DPB1/HLA-DRB5/HLA-DRB1/HLA-DQB2/HLA-DQA1	11
MF	GO:0005518	collagen binding	15/413	69/18368	2.76e-11	3.22e-09	2.66e-09	AEBP1/SERPINH1/MRC2/LUM/COL6A2/COL14A1/NID2/FN1/THBS1/ITGA2/MMP9/ECM2/CD44/PCOLCE/ITGA3	15
MF	GO:0023023	MHC protein complex binding	11/413	36/18368	2.36e-10	2.29e-08	1.89e-08	HLA-DPA1/HLA-DQB1/HLA-DOA/HLA-DQA2/HLA-DRA/CD74/HLA-DPB1/HLA-DRB5/HLA-DRB1/HLA-DQB2/HLA-DQA1	11
MF	GO:0140375	immune receptor activity	19/413	144/18368	5.93e-10	4.93e-08	4.09e-08	F3/OSMR/HLA-DPA1/IL1RAP/HLA-DQB1/HLA-DOA/IL13RA2/HLA-DQA2/HLA-DRA/C5AR1/CD74/FPR1/CRLF1/HLA-DRB1/FPR3/IL1R1/HLA-DQB2/CD44/HLA-DQA1	19
MF	GO:0005539	glycosaminoglycan binding	23/413	230/18368	2.45e-09	1.78e-07	1.48e-07	HAPLN2/NDNF/PTPRC/ADAMTS1/THBS4/TNFAIP6/VEGFA/POSTN/CCN1/FN1/LTF/SAA1/SULF1/THBS1/CXCL10/FSTL1/LGR6/COL5A1/CFH/ECM2/CD44/ADAMTS15/PCOLCE	23
MF	GO:0008201	heparin binding	19/413	166/18368	6.67e-09	4.31e-07	3.57e-07	NDNF/PTPRC/ADAMTS1/THBS4/VEGFA/POSTN/CCN1/FN1/LTF/SAA1/THBS1/CXCL10/FSTL1/LGR6/COL5A1/CFH/ECM2/ADAMTS15/PCOLCE	19
MF	GO:0030020	extracellular matrix structural constituent conferring tensile strength	10/413	41/18368	1.78e-08	1.04e-06	8.59e-07	COL5A2/COL1A1/COL1A2/COL3A1/COL6A2/COL14A1/COL4A2/COL5A1/COL4A1/COL8A2	10
MF	GO:0061134	peptidase regulator activity	21/413	230/18368	6e-08	3.18e-06	2.63e-06	C3/MAL/CAV1/SERPINF1/ANXA2/SERPINH1/SERPINA1/TIMP1/TFPI/CTSC/FN1/LTF/CD109/PTTG1/SERPINE1/CRB2/SFRP2/PROS1/BIRC5/SERPING1/PCOLCE	21
MF	GO:0019838	growth factor binding	16/413	141/18368	1.18e-07	5.74e-06	4.76e-06	COL1A1/LTBP1/OSMR/IGFBP3/VASN/EGFR/COL1A2/COL3A1/CCN1/THBS1/CD109/COL5A1/COL4A1/IGFBP2/IL1R1/SRPX2	16
MF	GO:0050840	extracellular matrix binding	10/413	56/18368	4.19e-07	1.88e-05	1.55e-05	ANXA2/SPP1/VEGFA/CCN1/THBS1/ITGA2/OLFML2B/CD248/ADAMTS15/ITGA3	10
MF	GO:0048407	platelet-derived growth factor binding	5/413	11/18368	2.32e-06	9.64e-05	7.98e-05	COL1A1/COL1A2/COL3A1/COL5A1/COL4A1	5
MF	GO:1901681	sulfur compound binding	20/413	265/18368	2.55e-06	9.9e-05	8.2e-05	NDNF/PTPRC/ADAMTS1/THBS4/VEGFA/POSTN/CCN1/FN1/LTF/SAA1/THBS1/ITGA2/CXCL10/FSTL1/LGR6/COL5A1/CFH/ECM2/ADAMTS15/PCOLCE	20
MF	GO:0061135	endopeptidase regulator activity	16/413	194/18368	8.47e-06	0.000307986	0.000255123	C3/SERPINF1/ANXA2/SERPINH1/SERPINA1/TIMP1/TFPI/LTF/CD109/PTTG1/SERPINE1/CRB2/SFRP2/PROS1/BIRC5/SERPING1	16
MF	GO:0042605	peptide antigen binding	7/413	36/18368	1.31e-05	0.000424248	0.00035143	HLA-DPA1/HLA-DQB1/HLA-DRA/HLA-DPB1/HLA-DRB5/HLA-DRB1/HLA-DQA1	7
MF	GO:0043394	proteoglycan binding	7/413	36/18368	1.31e-05	0.000424248	0.00035143	PTPRC/FN1/THBS1/ITGA2/COL5A1/CFH/TNC	7
MF	GO:0004866	endopeptidase inhibitor activity	15/413	180/18368	1.43e-05	0.000437199	0.000362158	C3/SERPINF1/ANXA2/SERPINH1/SERPINA1/TIMP1/TFPI/LTF/CD109/PTTG1/SERPINE1/CRB2/PROS1/BIRC5/SERPING1	15
MF	GO:0030414	peptidase inhibitor activity	15/413	187/18368	2.24e-05	0.000653184	0.000541071	C3/SERPINF1/ANXA2/SERPINH1/SERPINA1/TIMP1/TFPI/LTF/CD109/PTTG1/SERPINE1/CRB2/PROS1/BIRC5/SERPING1	15
MF	GO:0004252	serine-type endopeptidase activity	14/413	174/18368	4.05e-05	0.00112335	0.000930541	F3/CFI/CTSC/ST14/LTF/PRSS23/C2/C1RL/C1R/MMP9/PLAT/PLAU/MMP14/C1S	14
MF	GO:0048018	receptor ligand activity	26/413	487/18368	4.56e-05	0.00120232	0.000995952	CXCL8/HAMP/CLCF1/JAG1/SECTM1/TTR/THBS4/CCL2/GDF15/TIMP1/SPP1/VEGFA/LIF/CXCL10/CCL5/TGFB2/CXCL1/DKK1/OGN/SFRP2/CRLF1/TYMP/NAMPT/TRH/CARTPT/PDGFD	26
MF	GO:0050786	RAGE receptor binding	4/413	10/18368	4.75e-05	0.00120232	0.000995952	S100A4/S100A8/FPR1/S100A9	4
MF	GO:0002020	protease binding	12/413	135/18368	5.46e-05	0.001323	0.00109592	F3/COL1A1/ANXA2/MBP/SERPINA1/COL1A2/TIMP1/COL3A1/FN1/SERPINE1/IL1R1/ITGA3	12
MF	GO:0030546	signaling receptor activator activity	26/413	495/18368	5.97e-05	0.00138926	0.0011508	CXCL8/HAMP/CLCF1/JAG1/SECTM1/TTR/THBS4/CCL2/GDF15/TIMP1/SPP1/VEGFA/LIF/CXCL10/CCL5/TGFB2/CXCL1/DKK1/OGN/SFRP2/CRLF1/TYMP/NAMPT/TRH/CARTPT/PDGFD	26
MF	GO:0019955	cytokine binding	12/413	139/18368	7.25e-05	0.0015809	0.00130955	LTBP1/OSMR/VASN/IL13RA2/CD74/PLP2/THBS1/CD109/PDPN/CRLF1/GBP1/IL1R1	12
MF	GO:0097493	structural molecule activity conferring elasticity	4/413	11/18368	7.33e-05	0.0015809	0.00130955	LAMC1/FBLN5/EMILIN2/EMILIN3	4
MF	GO:0008083	growth factor activity	13/413	162/18368	7.8e-05	0.00162217	0.00134374	CLCF1/JAG1/THBS4/GDF15/TIMP1/VEGFA/LIF/TGFB2/CXCL1/DKK1/OGN/TYMP/PDGFD	13
MF	GO:0008236	serine-type peptidase activity	14/413	191/18368	0.00011122	0.00223208	0.00184896	F3/CFI/CTSC/ST14/LTF/PRSS23/C2/C1RL/C1R/MMP9/PLAT/PLAU/MMP14/C1S	14
MF	GO:0017171	serine hydrolase activity	14/413	195/18368	0.000138507	0.00268703	0.00222583	F3/CFI/CTSC/ST14/LTF/PRSS23/C2/C1RL/C1R/MMP9/PLAT/PLAU/MMP14/C1S	14
MF	GO:0008017	microtubule binding	17/413	271/18368	0.00014579	0.00273709	0.0022673	KIF15/GTSE1/KIF11/FAM83D/KIF2C/KIF20A/KIFC1/MX1/S100A8/S100A9/PRC1/NUSAP1/TPX2/KIF18B/BIRC5/KIF4A/CENPF	17
MF	GO:0005161	platelet-derived growth factor receptor binding	4/413	15/18368	0.00028244	0.00513688	0.00425518	VEGFA/ITGA5/IL1R1/PDGFD	4
MF	GO:0005125	cytokine activity	15/413	235/18368	0.000293857	0.00518258	0.00429304	CXCL8/CLCF1/SECTM1/CCL2/GDF15/TIMP1/SPP1/VEGFA/LIF/CXCL10/CCL5/TGFB2/CXCL1/CRLF1/NAMPT	15
MF	GO:0001968	fibronectin binding	5/413	28/18368	0.000359716	0.00607305	0.00503067	IGFBP3/VEGFA/THBS1/SFRP2/ITGA3	5
MF	GO:0035173	histone kinase activity	4/413	16/18368	0.00036993	0.00607305	0.00503067	AURKB/CDK2/AURKA/CDK1	4
MF	GO:0016504	peptidase activator activity	6/413	43/18368	0.000375653	0.00607305	0.00503067	MAL/CAV1/CTSC/FN1/SFRP2/PCOLCE	6
MF	GO:0030246	carbohydrate binding	16/413	271/18368	0.000445683	0.00701048	0.0058072	CHI3L1/MRC2/CD302/CD22/HLA-DRA/LOXL2/COLEC12/PYGL/CD248/SIGLEC1/PTX3/P3H2/HLA-DRB1/CHI3L2/CD93/MAG	16
MF	GO:0098641	cadherin binding involved in cell-cell adhesion	4/413	18/18368	0.000600203	0.00919258	0.00761476	ANXA2/S100A11/PDLIM1/ANXA1	4
MF	GO:0019207	kinase regulator activity	14/413	233/18368	0.000841369	0.0125558	0.0104007	SOCS3/IQGAP1/SPRY4/CCNA2/LTF/CXCL10/CCL5/CDKN2C/CCNB2/CCKBR/PKIB/SOCS2/TPX2/CCNB1	14
MF	GO:0015631	tubulin binding	19/413	375/18368	0.000891936	0.012742	0.0105549	KIF15/GTSE1/KIF11/ARL4C/PIFO/FAM83D/KIF2C/KIF20A/KIFC1/MX1/S100A8/S100A9/PRC1/NUSAP1/TPX2/KIF18B/BIRC5/KIF4A/CENPF	19
MF	GO:0003777	microtubule motor activity	7/413	69/18368	0.00089763	0.012742	0.0105549	KIF15/KIF11/KIF2C/KIF20A/KIFC1/KIF18B/KIF4A	7
MF	GO:0005126	cytokine receptor binding	15/413	271/18368	0.00127924	0.0177266	0.014684	CXCL8/CLCF1/OSMR/IL1RAP/CCL2/VEGFA/ITGA5/LIF/CXCL10/CCL5/TGFB2/CXCL1/STAT1/SOCS2/CRLF1	15
MF	GO:0030021	extracellular matrix structural constituent conferring compression resistance	4/413	22/18368	0.00133634	0.0180872	0.0149827	FMOD/LUM/OGN/HSPG2	4
MF	GO:0004896	cytokine receptor activity	8/413	97/18368	0.00154316	0.0204119	0.0169084	F3/OSMR/IL1RAP/IL13RA2/CD74/CRLF1/IL1R1/CD44	8
MF	GO:0004867	serine-type endopeptidase inhibitor activity	8/413	98/18368	0.0016481	0.0213154	0.0176568	SERPINF1/ANXA2/SERPINH1/SERPINA1/TFPI/CD109/SERPINE1/SERPING1	8
MF	GO:0050431	transforming growth factor beta binding	4/413	24/18368	0.00187358	0.0237049	0.0196362	LTBP1/VASN/THBS1/CD109	4
MF	GO:0004875	complement receptor activity	3/413	12/18368	0.00213447	0.0252297	0.0208992	C5AR1/FPR1/FPR3	3
MF	GO:0035325	Toll-like receptor binding	3/413	12/18368	0.00213447	0.0252297	0.0208992	S100A8/TLR1/S100A9	3
MF	GO:0046790	virion binding	3/413	12/18368	0.00213447	0.0252297	0.0208992	ANXA2/SIGLEC1/PTX3	3
MF	GO:0031406	carboxylic acid binding	11/413	176/18368	0.0021675	0.0252297	0.0208992	FABP5/CD22/S100A8/ALOX5AP/TYMS/PYGL/S100A9/ST8SIA4/P3H2/FOLR1/MAG	11
MF	GO:0019887	protein kinase regulator activity	12/413	204/18368	0.00230912	0.0263512	0.0218282	SOCS3/IQGAP1/SPRY4/CCNA2/LTF/CXCL10/CCL5/CDKN2C/CCNB2/PKIB/TPX2/CCNB1	12
MF	GO:0036041	long-chain fatty acid binding	3/413	14/18368	0.00341554	0.0375065	0.0310688	S100A8/ALOX5AP/S100A9	3
MF	GO:0044548	S100 protein binding	3/413	14/18368	0.00341554	0.0375065	0.0310688	ANXA2/IQGAP1/S100A11	3
MF	GO:0048306	calcium-dependent protein binding	7/413	88/18368	0.00367388	0.0395962	0.0327999	S100A4/ANXA2/S100A11/S100A8/S100A3/S100A9/ANXA1	7
MF	GO:0005044	scavenger receptor activity	5/413	47/18368	0.00396021	0.0419063	0.0347135	CD163/MSR1/CFI/LOXL2/COLEC12	5
MF	GO:0017147	Wnt-protein binding	4/413	30/18368	0.00434588	0.0443738	0.0367574	FZD6/SFRP4/SFRP2/CTHRC1	4
MF	GO:0070566	adenylyltransferase activity	4/413	30/18368	0.00434588	0.0443738	0.0367574	OAS2/OAS3/TENT5A/OAS1	4
MF	GO:0008009	chemokine activity	5/413	49/18368	0.00474654	0.0476291	0.039454	CXCL8/CCL2/CXCL10/CCL5/CXCL1	5
MF	GO:0046935	1-phosphatidylinositol-3-kinase regulator activity	3/413	16/18368	0.0050824	0.0484911	0.0401681	SOCS3/CCKBR/SOCS2	3
MF	GO:0050135	NAD(P)+ nucleosidase activity	3/413	16/18368	0.0050824	0.0484911	0.0401681	IL1RAP/TLR1/IL1R1	3
MF	GO:0061809	NAD+ nucleotidase, cyclic ADP-ribose generating	3/413	16/18368	0.0050824	0.0484911	0.0401681	IL1RAP/TLR1/IL1R1	3
