# Supplementary material for: A cuproptosis-based prognostic model for predicting survival in low-grade glioma
Source: Aging (Albany NY). 2024 May 9;16(10):8697–716. doi: 10.18632/aging.205834 (PMC11164498; doi:10.18632/aging.205834)
Supplement: Supplementary Table 4 [file aging-16-205834-s004.xlsx]

## Sheet: Sheet1
Supplementary Table 4. GO enrichment analysis results file.
CGGA_ID	Grade	Gender	Age	OS	Censor (alive=0; dead=1)
CGGA_1002	WHO III	Female	43	305	1
CGGA_1003	WHO II	Female	47	3817	0
CGGA_1010	WHO II	Male	45	246	1
CGGA_1012	WHO II	Male	45	3679	1
CGGA_1014	WHO II	Male	42	263	1
CGGA_1017	WHO IV	Female	29	768	1
CGGA_1018	WHO II	Male	50	2527	1
CGGA_103	WHO III	Male	56	1188	1
CGGA_1030	WHO II	Female	40	3664	0
CGGA_1032	WHO II	Female	41	643	1
CGGA_1033	WHO II	Male	44	1322	0
CGGA_1036	WHO IV	Male	41	806	1
CGGA_1037	WHO II	Male	44	780	0
CGGA_1041	WHO IV	Male	58	3593	0
CGGA_1048	WHO II	Female	27	703	0
CGGA_1051	WHO II	Male	47	838	1
CGGA_1055	WHO III	Male	43	1611	1
CGGA_1057	WHO II	Female	57	1549	1
CGGA_1058	WHO II	Male	34	995	1
CGGA_106	WHO II	Male	30	5028	0
CGGA_1063	WHO II	Male	29	NA	NA
CGGA_1065	WHO II	Female	48	3412	0
CGGA_1066	WHO II	Female	34	723	1
CGGA_1069	WHO II	Male	47	NA	NA
CGGA_107	WHO III	Female	38	2156	1
CGGA_1075	WHO IV	Male	72	398	1
CGGA_108	WHO III	Male	44	366	1
CGGA_1082	WHO II	Female	55	NA	NA
CGGA_1086	WHO IV	Female	65	1977	1
CGGA_1087	WHO II	Female	36	701	0
CGGA_1097	WHO II	Male	30	1378	1
CGGA_1100	WHO II	Female	61	3314	0
CGGA_1101	WHO II	Female	35	214	1
CGGA_1103	WHO IV	Female	35	585	1
CGGA_1106	WHO IV	Male	37	420	1
CGGA_1108	WHO III	Female	39	684	1
CGGA_1111	WHO III	Male	45	2696	1
CGGA_112	WHO II	Male	17	1534	1
CGGA_1120	WHO III	Female	58	422	1
CGGA_1121	WHO III	Female	29	3278	0
CGGA_1126	WHO III	Male	44	784	1
CGGA_1127	WHO II	Male	33	2630	1
CGGA_1130	WHO IV	Female	23	402	1
CGGA_1131	WHO III	Female	46	3251	0
CGGA_1132	WHO III	Female	33	3251	0
CGGA_1134	WHO IV	Female	56	59	1
CGGA_1135	WHO IV	Male	40	1244	1
CGGA_1137	WHO III	Male	58	3237	0
CGGA_1138	WHO IV	Male	54	411	1
CGGA_1141	WHO III	Male	65	432	1
CGGA_1142	WHO IV	Male	60	1005	1
CGGA_1144	WHO III	Female	39	2505	0
CGGA_1147	WHO II	Male	36	3215	0
CGGA_1148	WHO II	Male	37	596	1
CGGA_1152	WHO II	Male	13	3201	0
CGGA_1154	WHO III	Female	33	369	1
CGGA_1155	WHO III	Male	43	1373	1
CGGA_1156	WHO II	Female	41	3194	0
CGGA_1157	WHO II	Male	64	727	1
CGGA_1158	WHO II	Male	39	3188	0
CGGA_1159	WHO II	Male	51	3181	0
CGGA_1161	WHO III	Male	36	3180	0
CGGA_1162	WHO III	Male	39	3174	0
CGGA_1164	WHO IV	Female	38	1022	1
CGGA_1169	WHO III	Male	30	1765	1
CGGA_1172	WHO IV	Female	36	3131	0
CGGA_1178	WHO III	Male	41	422	1
CGGA_1181	WHO II	Male	36	318	0
CGGA_1183	WHO III	Female	25	408	1
CGGA_1184	WHO III	Male	46	156	1
CGGA_1185	WHO III	Female	50	731	1
CGGA_1191	WHO III	Male	53	3082	0
CGGA_1192	WHO II	Female	43	3080	0
CGGA_1195	WHO III	Male	43	476	1
CGGA_1198	WHO II	Male	30	3066	0
CGGA_120	WHO IV	Male	42	288	1
CGGA_1204	WHO II	Male	53	3056	0
CGGA_1205	WHO III	Female	59	929	1
CGGA_1207	WHO III	Female	49	3049	0
CGGA_1208	WHO IV	Male	38	161	1
CGGA_1211	WHO II	Male	40	3042	0
CGGA_1212	WHO III	Male	31	2292	1
CGGA_1223	WHO III	Male	42	682	1
CGGA_1226	WHO II	Female	33	670	1
CGGA_1228	WHO II	Male	34	2626	0
CGGA_1232	WHO III	Male	39	2067	1
CGGA_1235	WHO III	Female	32	3004	0
CGGA_1236	WHO IV	Female	47	191	1
CGGA_1238	WHO II	Female	11	2996	0
CGGA_1239	WHO II	Female	44	2997	0
CGGA_1248	WHO IV	Male	54	138	1
CGGA_1255	WHO IV	Male	49	118	1
CGGA_1256	WHO IV	Female	52	2557	0
CGGA_1257	WHO IV	Male	59	192	1
CGGA_1260	WHO IV	Male	32	177	1
CGGA_1262	WHO IV	Female	69	166	1
CGGA_1264	WHO III	Female	37	2929	0
CGGA_1269	WHO III	Female	35	2923	0
CGGA_1273	WHO III	Male	64	2438	0
CGGA_1282	WHO IV	Female	33	1116	1
CGGA_1286	WHO II	Female	52	2906	0
CGGA_1291	WHO III	Male	41	2422	0
CGGA_1295	WHO III	Male	40	310	1
CGGA_1300	WHO III	Male	35	1793	1
CGGA_1303	WHO III	Female	45	2861	0
CGGA_1305	WHO III	Male	43	2702	1
CGGA_1309	WHO III	Male	65	964	0
CGGA_1311	WHO III	Female	29	1080	1
CGGA_1317	WHO II	Male	45	2864	0
CGGA_1318	WHO II	Male	39	1497	0
CGGA_1319	WHO III	Female	42	2861	0
CGGA_1321	WHO III	Male	46	702	1
CGGA_1325	WHO IV	Male	20	NA	NA
CGGA_1326	WHO IV	Male	45	322	1
CGGA_1334	WHO II	Female	33	146	1
CGGA_1335	WHO II	Female	43	2839	0
CGGA_1337	WHO IV	Male	67	2172	1
CGGA_1339	WHO II	Male	41	2832	0
CGGA_1345	WHO II	Male	56	2825	0
CGGA_135	WHO III	Female	41	1924	1
CGGA_1350	WHO II	Male	36	2819	0
CGGA_1353	WHO IV	Male	65	1022	1
CGGA_1354	WHO IV	Female	40	530	1
CGGA_1356	WHO III	Male	52	948	1
CGGA_1359	WHO III	Male	21	343	1
CGGA_1361	WHO II	Male	40	2804	0
CGGA_1362	WHO III	Female	64	2804	0
CGGA_1365	WHO IV	Male	55	253	1
CGGA_1368	WHO II	Male	49	2797	0
CGGA_1369	WHO III	Female	37	360	0
CGGA_1371	WHO IV	Male	68	2791	0
CGGA_1377	WHO III	Male	28	2780	0
CGGA_1378	WHO IV	Male	47	378	1
CGGA_1380	WHO IV	Male	46	291	1
CGGA_1382	WHO IV	Male	57	284	1
CGGA_1383	WHO III	Female	47	884	0
CGGA_1386	WHO III	Male	34	2770	0
CGGA_1387	WHO IV	Male	41	90	1
CGGA_1389	WHO III	Female	67	1669	1
CGGA_139	WHO IV	Male	59	694	1
CGGA_1390	WHO III	Male	50	2050	0
CGGA_1391	WHO IV	Male	62	426	0
CGGA_1392	WHO IV	Male	62	473	1
CGGA_1398	WHO III	Male	43	554	1
CGGA_1400	WHO III	Female	53	2742	0
CGGA_1401	WHO III	Male	39	1680	1
CGGA_1402	WHO IV	Male	30	2742	0
CGGA_1403	WHO IV	Female	43	679	1
CGGA_1404	WHO III	Female	56	2741	0
CGGA_1407	WHO III	Female	29	2728	0
CGGA_1410	WHO IV	Female	27	825	1
CGGA_1413	WHO III	Male	35	2720	0
CGGA_1415	WHO IV	Female	30	2719	0
CGGA_1416	WHO III	Male	42	1933	1
CGGA_1417	WHO III	Male	56	2713	0
CGGA_1418	WHO IV	Female	73	287	1
CGGA_1419	WHO IV	Male	56	249	1
CGGA_1420	WHO IV	Male	60	364	1
CGGA_1421	WHO III	Male	35	2699	0
CGGA_1422	WHO IV	Male	76	204	1
CGGA_1424	WHO III	Female	41	2692	0
CGGA_1425	WHO IV	Female	22	640	1
CGGA_1426	WHO IV	Female	50	133	1
CGGA_1427	WHO II	Female	30	339	0
CGGA_1429	WHO IV	Female	40	2685	0
CGGA_1430	WHO IV	Female	28	162	1
CGGA_1431	WHO III	Male	48	2048	1
CGGA_1433	WHO IV	Female	72	394	1
CGGA_1434	WHO III	Male	61	67	1
CGGA_1435	WHO III	Female	46	1657	1
CGGA_1437	WHO III	Male	48	1037	1
CGGA_1440	WHO II	Female	29	2670	0
CGGA_1441	WHO IV	Male	70	1882	1
CGGA_1443	WHO II	Male	41	2665	0
CGGA_1444	WHO IV	Female	68	378	1
CGGA_1445	WHO III	Male	37	2664	0
CGGA_1446	WHO II	Male	29	2664	0
CGGA_1447	WHO III	Male	48	308	1
CGGA_1451	WHO IV	Female	45	438	1
CGGA_1452	WHO IV	Male	53	468	1
CGGA_1454	WHO II	Female	42	2655	0
CGGA_1455	WHO II	Male	40	2655	0
CGGA_1457	WHO IV	Male	60	312	1
CGGA_1458	WHO III	Female	54	127	1
CGGA_1459	WHO III	Male	55	503	1
CGGA_1461	WHO IV	Female	60	226	1
CGGA_1462	WHO IV	Male	49	174	1
CGGA_1463	WHO II	Female	69	2633	0
CGGA_1467	WHO IV	Male	58	866	1
CGGA_1469	WHO III	Male	46	2626	0
CGGA_1471	WHO II	Male	45	2623	0
CGGA_1472	WHO IV	Male	34	1025	1
CGGA_1473	WHO III	Female	28	265	1
CGGA_1474	WHO III	Female	50	333	0
CGGA_1476	WHO IV	Female	53	299	1
CGGA_1477	WHO II	Male	43	1194	1
CGGA_1478	WHO IV	Female	72	542	1
CGGA_1480	WHO IV	Male	41	405	1
CGGA_1481	WHO IV	Male	55	131	1
CGGA_1482	WHO III	Male	38	2592	0
CGGA_1486	WHO IV	Male	45	184	1
CGGA_1487	WHO III	Female	49	520	1
CGGA_1488	WHO II	Male	31	2586	0
CGGA_1491	WHO IV	Male	29	246	1
CGGA_1492	WHO IV	Female	47	268	1
CGGA_1494	WHO IV	Male	21	269	1
CGGA_1496	WHO IV	Female	42	330	1
CGGA_1497	WHO III	Female	24	1178	1
CGGA_1498	WHO IV	Male	69	NA	NA
CGGA_1500	WHO IV	Female	45	108	1
CGGA_1501	WHO IV	Male	58	222	1
CGGA_1502	WHO II	Female	27	2565	0
CGGA_1503	WHO IV	Male	47	777	1
CGGA_1504	WHO III	Female	44	2558	0
CGGA_1505	WHO IV	Male	30	172	1
CGGA_1507	WHO IV	Female	41	715	1
CGGA_1508	WHO III	Male	39	1049	1
CGGA_1510	WHO III	Male	40	271	1
CGGA_1513	WHO III	Female	36	2352	1
CGGA_1514	WHO II	Female	57	76	1
CGGA_1516	WHO II	Male	46	2530	0
CGGA_1517	WHO II	Male	42	2530	0
CGGA_1518	WHO III	Female	19	411	1
CGGA_1520	WHO IV	Female	67	297	1
CGGA_1521	WHO IV	Female	63	205	1
CGGA_1523	WHO II	Male	50	2508	0
CGGA_1524	WHO III	Male	36	1004	1
CGGA_1525	WHO III	Male	41	1686	1
CGGA_1526	WHO III	Male	39	2502	0
CGGA_1527	WHO III	Male	47	1714	1
CGGA_1528	WHO II	Female	27	2497	0
CGGA_1529	WHO IV	Male	63	583	1
CGGA_1530	WHO III	Male	41	2497	0
CGGA_1531	WHO III	Male	36	NA	NA
CGGA_1533	WHO III	Female	61	1217	1
CGGA_1534	WHO IV	Female	58	27	1
CGGA_1535	WHO IV	Male	43	232	1
CGGA_1536	WHO II	Male	53	840	1
CGGA_1537	WHO IV	Male	73	97	1
CGGA_1538	WHO IV	Female	57	247	1
CGGA_1539	WHO IV	Male	61	2462	0
CGGA_1541	WHO IV	Female	50	67	1
CGGA_1542	WHO IV	Male	26	184	0
CGGA_1543	WHO IV	Male	57	723	1
CGGA_1544	WHO III	Female	38	208	1
CGGA_1546	WHO IV	Male	56	223	1
CGGA_1548	WHO IV	Male	53	1054	1
CGGA_1551	WHO IV	Female	50	347	1
CGGA_1552	WHO III	Male	39	2432	0
CGGA_1553	WHO III	Male	30	540	1
CGGA_1554	WHO III	Male	34	824	1
CGGA_1557	WHO III	Male	47	2427	0
CGGA_1558	WHO IV	Male	71	130	1
CGGA_1559	WHO IV	Male	63	603	1
CGGA_1560	WHO IV	Female	35	459	1
CGGA_1562	WHO III	Male	51	2032	1
CGGA_1563	WHO II	Female	32	2423	0
CGGA_1564	WHO IV	Male	48	190	1
CGGA_1565	WHO III	Female	23	1417	0
CGGA_1566	WHO III	Female	43	2420	0
CGGA_1567	WHO III	Female	48	840	1
CGGA_1568	WHO III	Female	26	345	0
CGGA_1569	WHO III	Female	27	1406	0
CGGA_157	WHO II	Male	34	914	1
CGGA_1571	WHO IV	Female	43	412	0
CGGA_1572	WHO IV	Female	60	160	1
CGGA_1575	WHO III	Male	37	129	1
CGGA_1579	WHO II	Male	37	2398	0
CGGA_1580	WHO III	Female	34	1581	1
CGGA_1583	WHO II	Female	51	1606	1
CGGA_1586	WHO IV	Female	55	232	1
CGGA_1587	WHO III	Female	30	750	1
CGGA_1588	WHO III	Female	24	2003	0
CGGA_1589	WHO II	Male	49	342	1
CGGA_1591	WHO III	Male	54	1133	1
CGGA_1592	WHO III	Male	37	1588	1
CGGA_1594	WHO II	Male	25	480	0
CGGA_1595	WHO IV	Female	34	2363	0
CGGA_1596	WHO IV	Male	63	205	1
CGGA_1597	WHO IV	Male	58	174	1
CGGA_1598	WHO III	Male	31	564	1
CGGA_1601	WHO IV	Male	66	710	1
CGGA_1603	WHO IV	Male	18	356	1
CGGA_1604	WHO IV	Male	46	740	1
CGGA_1605	WHO IV	Male	34	321	1
CGGA_1606	WHO III	Female	28	471	1
CGGA_1607	WHO II	Female	35	1333	1
CGGA_1608	WHO III	Male	38	1953	0
CGGA_1610	WHO III	Male	39	1058	1
CGGA_1611	WHO IV	Female	30	1158	1
CGGA_1612	WHO IV	Male	68	718	1
CGGA_1613	WHO IV	Male	53	250	0
CGGA_1614	WHO III	Male	51	1079	1
CGGA_1615	WHO IV	Male	48	586	1
CGGA_1617	WHO II	Female	35	2310	0
CGGA_1618	WHO III	Male	31	2319	0
CGGA_1619	WHO III	Male	44	766	1
CGGA_1620	WHO III	Male	51	2312	0
CGGA_1621	WHO II	Female	48	2311	0
CGGA_1623	WHO III	Female	16	2307	0
CGGA_1624	WHO IV	Female	27	87	1
CGGA_1626	WHO IV	Male	66	696	1
CGGA_1627	WHO III	Male	37	2301	0
CGGA_1630	WHO II	Male	26	2160	0
CGGA_1631	WHO IV	Female	58	221	1
CGGA_1634	WHO IV	Female	26	366	1
CGGA_1635	WHO IV	Female	43	332	1
CGGA_1640	WHO III	Male	55	2267	0
CGGA_1641	WHO IV	Female	57	291	1
CGGA_1642	WHO II	Male	48	2266	0
CGGA_1643	WHO IV	Female	50	NA	NA
CGGA_1644	WHO IV	Male	48	173	1
CGGA_1645	WHO III	Male	59	1996	0
CGGA_1647	WHO II	Male	40	2229	0
CGGA_1648	WHO III	Female	45	1747	0
CGGA_1649	WHO II	Male	36	2225	0
CGGA_165	WHO II	Male	34	183	0
CGGA_1650	WHO IV	Male	36	1283	1
CGGA_1651	WHO II	Female	44	842	1
CGGA_1653	WHO II	Female	47	2217	0
CGGA_1654	WHO IV	Male	61	NA	NA
CGGA_1655	WHO II	Male	48	1209	0
CGGA_1656	WHO IV	Male	56	149	1
CGGA_1657	WHO III	Female	20	2215	0
CGGA_1658	WHO IV	Female	64	1574	1
CGGA_1659	WHO IV	Male	24	387	1
CGGA_1660	WHO II	Male	41	NA	NA
CGGA_1661	WHO III	Female	42	2209	0
CGGA_1662	WHO II	Female	55	1493	0
CGGA_1663	WHO IV	Male	61	290	1
CGGA_1664	WHO II	Female	40	1528	1
CGGA_1666	WHO IV	Male	60	249	1
CGGA_1667	WHO III	Female	40	2180	0
CGGA_1669	WHO III	Female	44	139	1
CGGA_1670	WHO III	Female	30	365	1
CGGA_1671	WHO III	Female	26	2168	0
CGGA_1672	WHO III	Female	49	NA	NA
CGGA_1673	WHO II	Female	23	2160	0
CGGA_1675	WHO III	Male	38	2154	0
CGGA_1677	WHO II	Female	39	NA	NA
CGGA_1678	WHO IV	Male	51	657	1
CGGA_1679	WHO III	Female	52	2146	0
CGGA_1680	WHO III	Male	45	596	1
CGGA_1681	WHO IV	Female	58	346	1
CGGA_1682	WHO IV	Male	67	345	1
CGGA_1684	WHO IV	Male	51	NA	NA
CGGA_1685	WHO III	Male	33	225	1
CGGA_1686	WHO III	Male	27	745	1
CGGA_1687	WHO IV	Male	14	2118	0
CGGA_1688	WHO III	Female	51	51	1
CGGA_1689	WHO II	Male	45	2118	0
CGGA_1690	WHO IV	Male	60	592	1
CGGA_1693	WHO III	Male	61	517	1
CGGA_1694	WHO IV	Male	55	624	1
CGGA_1695	WHO III	Male	45	2094	0
CGGA_1696	WHO III	Male	72	1205	0
CGGA_1697	WHO IV	Female	47	89	1
CGGA_1698	WHO IV	Female	55	388	1
CGGA_1699	WHO IV	Female	41	2088	0
CGGA_1700	WHO III	Male	49	2076	0
CGGA_1701	WHO III	Male	44	1696	0
CGGA_1702	WHO IV	Female	29	168	1
CGGA_1703	WHO II	Female	30	1592	0
CGGA_1704	WHO II	Female	32	2064	0
CGGA_1706	WHO IV	Male	60	2068	0
CGGA_1708	WHO IV	Female	54	1122	1
CGGA_1709	WHO IV	Male	47	415	1
CGGA_1713	WHO IV	Male	62	332	1
CGGA_1714	WHO III	Female	37	2034	0
CGGA_1715	WHO II	Female	12	2033	0
CGGA_1716	WHO III	Male	38	951	1
CGGA_1718	WHO III	Female	37	1996	0
CGGA_1720	WHO II	Male	35	1994	0
CGGA_1721	WHO III	Female	46	1994	0
CGGA_1722	WHO IV	Female	60	349	1
CGGA_1723	WHO III	Female	39	1986	0
CGGA_1725	WHO III	Female	33	1983	0
CGGA_1727	WHO IV	Male	48	1980	0
CGGA_1728	WHO IV	Male	45	917	1
CGGA_1729	WHO IV	Male	52	244	1
CGGA_1731	WHO III	Female	45	1976	0
CGGA_1735	WHO IV	Male	54	813	1
CGGA_1736	WHO IV	Female	57	938	1
CGGA_1737	WHO III	Male	33	1952	0
CGGA_1738	WHO III	Male	49	469	1
CGGA_1739	WHO III	Male	45	515	1
CGGA_1740	WHO IV	Female	50	363	1
CGGA_1743	WHO III	Female	47	1361	1
CGGA_1744	WHO IV	Male	51	1936	0
CGGA_1745	WHO III	Female	45	1929	0
CGGA_1747	WHO III	Female	27	293	1
CGGA_1749	WHO IV	Female	44	401	1
CGGA_1750	WHO IV	Female	52	250	1
CGGA_1758	WHO IV	Female	45	414	1
CGGA_1760	WHO II	Male	51	459	1
CGGA_1764	WHO IV	Male	33	710	1
CGGA_1767	WHO IV	Male	63	86	1
CGGA_1769	WHO IV	Female	49	1854	0
CGGA_1770	WHO IV	Female	43	267	1
CGGA_1771	WHO III	Male	38	1068	1
CGGA_1773	WHO IV	Female	46	104	1
CGGA_1776	WHO IV	Male	23	259	1
CGGA_1780	WHO IV	Female	57	1826	0
CGGA_1785	WHO IV	Male	34	329	1
CGGA_1786	WHO III	Female	54	1817	0
CGGA_1791	WHO III	Male	55	855	1
CGGA_1807	WHO IV	Female	65	247	1
CGGA_1809	WHO III	Male	27	343	1
CGGA_1811	WHO IV	Male	64	304	1
CGGA_1812	WHO IV	Male	65	780	1
CGGA_1814	WHO IV	Female	46	221	1
CGGA_1815	WHO IV	Female	45	185	1
CGGA_1817	WHO IV	Female	72	399	1
CGGA_1819	WHO IV	Male	55	1005	1
CGGA_1820	WHO IV	Female	52	77	1
CGGA_1826	WHO IV	Female	70	44	1
CGGA_1829	WHO II	Male	23	801	0
CGGA_1833	WHO IV	Female	60	494	1
CGGA_1840	WHO IV	Female	58	1179	0
CGGA_1850	WHO II	Male	29	750	0
CGGA_1854	WHO III	Male	36	1626	0
CGGA_1857	WHO IV	Male	46	157	1
CGGA_1862	WHO III	Male	40	110	1
CGGA_1863	WHO III	Female	50	1594	0
CGGA_1865	WHO IV	Female	45	89	1
CGGA_1866	WHO IV	Male	68	127	1
CGGA_1870	WHO IV	Male	62	1556	0
CGGA_1875	WHO II	Female	22	1558	0
CGGA_1877	WHO III	Male	35	NA	NA
CGGA_1880	WHO III	Female	37	1302	0
CGGA_1882	WHO III	Male	33	1531	0
CGGA_1886	WHO IV	Male	31	338	1
CGGA_1899	WHO IV	Male	45	176	1
CGGA_1901	WHO IV	Male	60	540	1
CGGA_1902	WHO II	Male	33	1479	0
CGGA_1903	WHO III	Female	24	1474	0
CGGA_1906	WHO III	Male	57	1054	1
CGGA_1908	WHO IV	Female	42	298	1
CGGA_1911	WHO IV	Male	15	1451	0
CGGA_1912	WHO IV	Male	48	507	1
CGGA_1916	WHO IV	Female	33	NA	NA
CGGA_1939	WHO II	Male	31	NA	NA
CGGA_194	WHO III	Female	43	2304	1
CGGA_1946	WHO IV	Female	51	142	1
CGGA_1953	WHO IV	Male	47	73	1
CGGA_1955	WHO IV	Male	30	457	1
CGGA_1972	WHO IV	Male	47	1291	0
CGGA_1976	WHO IV	Female	53	73	1
CGGA_1985	WHO IV	Male	41	380	1
CGGA_1994	WHO III	Female	32	1237	0
CGGA_2002	WHO II	Male	40	572	1
CGGA_2003	WHO IV	Male	40	780	1
CGGA_2006	WHO III	Male	43	626	1
CGGA_2008	WHO IV	Male	56	44	1
CGGA_2013	WHO II	Male	41	139	1
CGGA_2024	WHO IV	Female	19	328	1
CGGA_2038	WHO IV	Male	44	NA	1
CGGA_2039	WHO IV	Male	28	702	0
CGGA_2046	WHO III	Male	46	251	1
CGGA_2047	WHO IV	Female	64	598	1
CGGA_2053	WHO IV	Male	55	1031	0
CGGA_2056	WHO IV	Female	41	1019	0
CGGA_2062	WHO IV	Female	63	41	1
CGGA_2075	WHO IV	Male	63	266	1
CGGA_2078	WHO IV	Female	61	280	1
CGGA_2079	WHO III	Male	45	964	0
CGGA_2081	WHO III	Female	39	961	0
CGGA_2082	WHO IV	Male	41	571	0
CGGA_2088	WHO IV	Female	30	NA	NA
CGGA_2106	WHO IV	Female	39	892	0
CGGA_2115	WHO IV	Female	31	171	1
CGGA_2121	WHO II	Female	41	346	1
CGGA_2129	WHO III	Male	48	828	0
CGGA_265	WHO II	Male	43	3959	0
CGGA_279	WHO III	Female	49	1314	1
CGGA_28	WHO II	Male	25	1103	1
CGGA_288	WHO II	Male	49	1057	1
CGGA_290	WHO II	Female	37	4725	0
CGGA_320	WHO II	Male	31	3005	1
CGGA_336	WHO III	Female	57	2549	1
CGGA_358	WHO III	Female	30	122	1
CGGA_362	WHO II	Female	39	NA	NA
CGGA_369	WHO II	Male	33	4606	0
CGGA_406	WHO III	Female	24	90	1
CGGA_42	WHO II	Male	38	2832	1
CGGA_420	WHO III	Female	39	3514	0
CGGA_457	WHO III	Male	32	75	1
CGGA_474	WHO III	Male	NA	2029	0
CGGA_482	WHO II	Male	45	2511	1
CGGA_487	WHO IV	Male	46	156	1
CGGA_492	WHO III	Male	27	652	0
CGGA_503	WHO II	Male	51	4410	0
CGGA_507	WHO III	Female	53	302	1
CGGA_509	WHO IV	Male	38	623	1
CGGA_521	WHO III	Male	32	514	1
CGGA_530	WHO IV	Female	41	506	1
CGGA_554	WHO III	Female	46	134	1
CGGA_568	WHO IV	Male	14	285	1
CGGA_583	WHO II	Female	36	3107	1
CGGA_619	WHO II	Male	40	550	1
CGGA_621	WHO III	Male	40	NA	NA
CGGA_625	WHO III	Female	33	2465	1
CGGA_634	WHO III	Female	35	2633	1
CGGA_652	WHO III	Male	42	476	1
CGGA_663	WHO II	Female	29	4210	0
CGGA_703	WHO III	Female	31	1355	1
CGGA_705	WHO III	Male	41	1507	1
CGGA_707	WHO II	Female	39	3299	1
CGGA_720	WHO II	Female	46	1258	1
CGGA_721	WHO II	Male	45	2552	1
CGGA_724	WHO II	Male	32	4147	0
CGGA_730	WHO II	Female	51	2118	1
CGGA_763	WHO III	Male	52	319	0
CGGA_777	WHO IV	Male	46	146	1
CGGA_780	WHO III	Female	64	923	1
CGGA_799	WHO III	Male	53	1868	1
CGGA_809	WHO II	Male	26	1252	1
CGGA_810	WHO III	Male	20	551	1
CGGA_825	WHO III	Male	36	836	1
CGGA_831	WHO IV	Female	55	546	1
CGGA_846	WHO II	Female	39	2991	0
CGGA_852	WHO III	Male	40	169	1
CGGA_861	WHO III	Male	29	893	1
CGGA_862	WHO II	Male	30	NA	NA
CGGA_863	WHO II	Female	42	2073	1
CGGA_867	WHO III	Female	40	367	1
CGGA_869	WHO IV	Female	36	537	0
CGGA_881	WHO III	Female	23	252	1
CGGA_882	WHO III	Male	30	1008	0
CGGA_883	WHO II	Female	39	NA	NA
CGGA_887	WHO III	Male	25	NA	NA
CGGA_888	WHO III	Male	29	669	1
CGGA_889	WHO II	Male	23	3943	0
CGGA_890	WHO III	Male	39	2982	1
CGGA_901	WHO III	Male	40	929	1
CGGA_903	WHO III	Female	27	1455	1
CGGA_D19	WHO II	Female	64	297	1
CGGA_D28	WHO III	Male	25	860	1
CGGA_D49	NA	Female	32	NA	NA
CGGA_D50	WHO II	Male	30	782	1
CGGA_D53	WHO IV	Male	30	NA	NA
CGGA_J50	WHO II	Male	27	1693	1
CGGA_J73	WHO III	Female	34	1134	1
CGGA_P100	WHO IV	Male	67	268	1
CGGA_P102	WHO IV	Male	30	1269	1
CGGA_P103	WHO II	Male	34	1651	0
CGGA_P104	WHO III	Female	36	167	1
CGGA_P106	WHO IV	Male	24	71	1
CGGA_P107	WHO II	Male	26	NA	NA
CGGA_P108	WHO III	Female	30	1644	0
CGGA_P109	WHO IV	Male	35	407	1
CGGA_P11	WHO II	Female	38	NA	NA
CGGA_P110	WHO III	Female	56	800	1
CGGA_P111	WHO II	Female	44	1638	0
CGGA_P112	WHO IV	Male	65	834	1
CGGA_P113	WHO II	Male	32	1708	0
CGGA_P114	WHO II	Male	32	NA	1
CGGA_P115	WHO II	Male	25	1626	0
CGGA_P116	WHO IV	Male	58	305	1
CGGA_P121	WHO II	Male	39	1608	0
CGGA_P122	WHO II	Male	43	1638	0
CGGA_P128	WHO II	Male	41	1586	0
CGGA_P13	WHO II	Female	40	1938	0
CGGA_P131	WHO III	Female	45	1596	0
CGGA_P132	WHO II	Male	42	1603	0
CGGA_P136	WHO IV	Female	41	842	1
CGGA_P137	WHO II	Male	42	1526	0
CGGA_P142	WHO III	Male	45	1558	0
CGGA_P143	WHO IV	Female	66	261	1
CGGA_P144	WHO III	Male	44	1559	0
CGGA_P145	WHO II	Male	53	308	1
CGGA_P146	WHO II	Male	31	NA	0
CGGA_P147	WHO II	Male	52	863	1
CGGA_P15	WHO IV	Male	49	723	1
CGGA_P150	WHO II	Male	34	NA	0
CGGA_P151	WHO II	Female	46	1582	0
CGGA_P153	WHO II	Male	45	1484	0
CGGA_P154	WHO IV	Male	50	NA	NA
CGGA_P155	WHO II	Male	50	1483	0
CGGA_P156	WHO II	Male	30	1488	0
CGGA_P157	WHO III	Female	55	470	1
CGGA_P158	WHO II	Male	27	1510	0
CGGA_P159	WHO III	Male	59	211	1
CGGA_P16	WHO IV	Male	38	NA	NA
CGGA_P160	WHO IV	Female	72	219	1
CGGA_P163	WHO III	Female	45	855	1
CGGA_P164	WHO IV	Male	27	1553	0
CGGA_P165	WHO III	Female	51	598	1
CGGA_P17	WHO III	Male	30	1930	0
CGGA_P172	WHO III	Male	33	1049	1
CGGA_P173	WHO II	Male	31	1448	0
CGGA_P174	WHO II	Male	31	1482	0
CGGA_P175	WHO IV	Male	45	183	1
CGGA_P176	WHO II	Female	32	804	0
CGGA_P177	WHO II	Male	43	1442	0
CGGA_P178	WHO IV	Female	52	1442	0
CGGA_P179	WHO II	Female	53	1454	0
CGGA_P18	WHO III	Male	40	387	1
CGGA_P180	WHO IV	Male	47	260	1
CGGA_P181	WHO III	Female	21	238	1
CGGA_P182	WHO IV	Female	58	1512	0
CGGA_P183	WHO III	Male	58	1512	0
CGGA_P185	WHO III	Female	41	502	1
CGGA_P19	WHO II	Male	39	1924	0
CGGA_P199	WHO IV	Male	66	203	1
CGGA_P20	WHO II	Female	58	1923	0
CGGA_P205	WHO IV	Male	66	583	1
CGGA_P21	WHO II	Male	25	1922	0
CGGA_P22	WHO IV	Male	62	406	1
CGGA_P23	WHO III	Female	62	392	1
CGGA_P25	WHO IV	Male	64	147	1
CGGA_P265	WHO III	Male	36	779	1
CGGA_P266	WHO III	Female	28	253	1
CGGA_P269	WHO III	Female	47	511	1
CGGA_P27	WHO II	Female	37	413	0
CGGA_P270	WHO II	Male	33	NA	1
CGGA_P271	WHO II	Male	42	1376	0
CGGA_P279	WHO III	Female	47	1334	0
CGGA_P28	WHO IV	Male	61	107	1
CGGA_P280	WHO IV	Female	52	1342	0
CGGA_P283	WHO IV	Male	38	1331	0
CGGA_P286	WHO II	Female	57	658	0
CGGA_P29	WHO III	Female	22	103	1
CGGA_P295	WHO IV	Male	46	273	1
CGGA_P298	WHO III	Female	50	NA	0
CGGA_P3	WHO III	Male	32	2126	0
CGGA_P30	WHO II	Male	48	404	1
CGGA_P306	WHO II	Male	49	922	1
CGGA_P308	WHO III	Male	38	563	1
CGGA_P31	WHO II	Male	42	1883	0
CGGA_P310	WHO III	Female	47	224	1
CGGA_P311	WHO II	Male	36	1247	0
CGGA_P314	WHO III	Female	34	1238	0
CGGA_P315	WHO II	Female	47	451	1
CGGA_P316	WHO II	Male	44	567	0
CGGA_P319	WHO III	Male	37	508	1
CGGA_P326	WHO III	Female	48	1217	0
CGGA_P328	WHO III	Female	54	580	1
CGGA_P335	WHO IV	Male	42	1203	0
CGGA_P337	WHO III	Female	61	689	1
CGGA_P338	WHO II	Male	51	1198	0
CGGA_P346	WHO II	Male	42	522	0
CGGA_P356	WHO II	Female	22	569	1
CGGA_P358	WHO II	Male	44	1168	0
CGGA_P364	WHO III	Female	41	495	1
CGGA_P385	WHO IV	Male	22	1112	0
CGGA_P388	WHO III	Female	37	293	1
CGGA_P392	WHO II	Male	35	1099	0
CGGA_P399	WHO II	Female	41	1090	0
CGGA_P401	WHO IV	Male	31	788	1
CGGA_P411	WHO IV	Female	47	440	1
CGGA_P415	WHO IV	Female	56	195	1
CGGA_P416	WHO III	Male	29	1069	0
CGGA_P421	WHO III	Male	26	308	1
CGGA_P422	WHO II	Female	41	1091	0
CGGA_P437	WHO III	Female	47	1023	0
CGGA_P438	WHO III	Male	41	1023	0
CGGA_P439	WHO II	Male	45	1022	0
CGGA_P446	WHO III	Female	47	1009	0
CGGA_P461	WHO III	Male	28	599	1
CGGA_P468	WHO III	Female	42	974	0
CGGA_P483	WHO III	Male	41	299	1
CGGA_P492	WHO II	Female	44	938	0
CGGA_P499	WHO IV	Female	69	NA	NA
CGGA_P5	WHO III	Female	45	378	1
CGGA_P500	WHO II	Female	34	930	0
CGGA_P501	WHO II	Male	27	926	0
CGGA_P505	WHO II	Male	34	924	0
CGGA_P508	WHO III	Male	40	377	1
CGGA_P510	WHO III	Male	42	912	0
CGGA_P512	WHO IV	Male	23	541	1
CGGA_P520	WHO III	Female	44	884	0
CGGA_P568	WHO III	Female	23	218	1
CGGA_P585	WHO IV	Male	50	344	1
CGGA_P594	WHO III	Male	40	84	1
CGGA_P596	WHO IV	Female	60	777	0
CGGA_P604	WHO III	Female	15	262	1
CGGA_P609	WHO IV	Female	19	726	0
CGGA_P610	WHO IV	Male	62	345	1
CGGA_P615	WHO II	Male	40	NA	NA
CGGA_P619	WHO IV	Female	66	236	1
CGGA_P623	WHO III	Male	52	NA	NA
CGGA_P625	WHO IV	Female	46	161	1
CGGA_P633	WHO III	Female	40	676	0
CGGA_P7	WHO IV	Male	45	110	1
CGGA_P83	WHO II	Female	28	1698	0
CGGA_P84	WHO II	Female	40	1694	0
CGGA_P86	WHO II	Female	34	1694	0
CGGA_P87	WHO IV	Male	32	240	1
CGGA_P89	WHO IV	Male	42	294	1
CGGA_P93	WHO II	Female	45	1678	0
CGGA_P98	WHO III	Male	44	317	1
CGGA_P99	WHO IV	Male	52	679	0
CGGA_1001	WHO IV	Male	11	3817	0
CGGA_1006	WHO III	Male	42	254	1
CGGA_1007	WHO IV	Female	57	345	1
CGGA_1011	WHO IV	Female	46	109	1
CGGA_1015	WHO IV	Male	62	164	1
CGGA_1019	WHO IV	Male	60	212	1
CGGA_1022	WHO II	Female	62	518	0
CGGA_1023	WHO IV	Female	56	681	1
CGGA_1024	WHO IV	Male	64	3074	1
CGGA_1026	WHO IV	Male	57	1570	1
CGGA_1034	WHO III	Male	23	753	1
CGGA_1035	WHO IV	Female	60	567	1
CGGA_1039	WHO IV	Male	40	727	1
CGGA_1045	WHO IV	Male	79	348	1
CGGA_1049	WHO IV	Male	58	809	1
CGGA_1052	WHO II	Male	41	NA	NA
CGGA_1072	WHO IV	Male	26	1090	1
CGGA_1077	WHO IV	Male	47	591	1
CGGA_1078	WHO IV	Female	61	315	1
CGGA_1079	WHO III	Male	38	471	1
CGGA_1081	WHO III	Female	30	216	1
CGGA_1083	WHO IV	Male	59	450	1
CGGA_1091	WHO IV	Female	51	1116	1
CGGA_1109	WHO IV	Male	42	1348	1
CGGA_1124	WHO IV	Male	47	484	1
CGGA_1139	WHO IV	Female	53	1196	1
CGGA_1140	WHO III	Female	49	921	1
CGGA_1145	WHO III	Male	41	239	1
CGGA_1171	WHO IV	Male	40	412	1
CGGA_1177	WHO IV	Male	40	449	1
CGGA_1180	WHO IV	Female	48	1226	0
CGGA_1188	WHO IV	Female	30	256	1
CGGA_1214	WHO IV	Female	49	604	1
CGGA_1216	WHO IV	Male	44	312	1
CGGA_1218	WHO IV	Male	53	286	1
CGGA_1224	WHO IV	Male	57	271	1
CGGA_1234	WHO IV	Male	32	705	1
CGGA_1237	WHO IV	Male	62	296	1
CGGA_1240	WHO IV	Male	33	19	1
CGGA_1251	WHO IV	Female	42	272	1
CGGA_1258	WHO IV	Male	42	114	1
CGGA_1263	WHO III	Male	50	772	1
CGGA_1270	WHO IV	Female	60	188	1
CGGA_1271	WHO IV	Male	17	523	1
CGGA_1272	WHO IV	Male	32	124	1
CGGA_1280	WHO III	Male	74	447	1
CGGA_1281	WHO III	Male	45	2909	0
CGGA_1283	WHO IV	Male	17	20	1
CGGA_1284	WHO III	Male	73	97	1
CGGA_1285	WHO IV	Female	58	79	1
CGGA_1292	WHO III	Male	17	2901	0
CGGA_1299	WHO IV	Male	54	550	1
CGGA_1301	WHO IV	Male	48	239	1
CGGA_1313	WHO IV	Male	42	379	1
CGGA_1320	WHO IV	Male	19	59	1
CGGA_1332	WHO IV	Female	55	510	0
CGGA_1338	WHO IV	Female	61	1122	1
CGGA_1340	WHO III	Male	35	1109	1
CGGA_1342	WHO IV	Male	47	186	1
CGGA_1343	WHO IV	Male	34	94	1
CGGA_1346	WHO IV	Female	57	284	1
CGGA_1370	WHO IV	Male	43	325	0
CGGA_1393	WHO IV	Male	41	275	1
CGGA_1408	WHO III	Female	64	1362	1
CGGA_1411	WHO III	Female	40	329	1
CGGA_235	WHO II	Male	24	2340	1
CGGA_269	WHO II	Female	45	2932	0
CGGA_272	WHO IV	Male	51	217	1
CGGA_274	WHO IV	Female	55	610	0
CGGA_276	WHO II	Male	44	529	0
CGGA_309	NA	Male	44	139	1
CGGA_318	WHO IV	Female	40	222	1
CGGA_323	WHO II	Female	48	4338	0
CGGA_330	WHO III	Male	45	1121	1
CGGA_413	WHO IV	Male	54	183	0
CGGA_426	WHO III	Male	50	1560	1
CGGA_448	WHO III	Male	64	354	1
CGGA_483	WHO IV	Female	59	277	1
CGGA_488	WHO III	Male	23	435	1
CGGA_493	WHO II	Female	32	2382	1
CGGA_494	WHO IV	Female	58	4435	0
CGGA_495	NA	Male	53	295	1
CGGA_499	WHO IV	Male	51	122	1
CGGA_525	WHO IV	Male	61	138	1
CGGA_541	WHO II	Female	36	4376	0
CGGA_564	WHO III	Male	47	679	1
CGGA_565	WHO III	Male	51	3605	0
CGGA_578	WHO III	Female	61	362	1
CGGA_599	WHO III	Female	66	418	1
CGGA_604	WHO IV	Male	46	381	1
CGGA_616	WHO III	Male	43	952	1
CGGA_624	WHO IV	Female	50	122	1
CGGA_630	WHO III	Male	43	4300	0
CGGA_633	WHO II	Female	56	1812	1
CGGA_638	WHO II	Male	42	2386	0
CGGA_643	WHO III	Male	56	331	1
CGGA_658	WHO IV	Male	55	372	1
CGGA_659	WHO II	Female	50	730	0
CGGA_661	WHO III	Male	42	NA	1
CGGA_669	WHO IV	Female	56	607	1
CGGA_676	WHO IV	Male	60	376	1
CGGA_678	WHO III	Male	56	386	1
CGGA_679	WHO IV	Female	63	263	1
CGGA_680	WHO IV	Male	44	2373	1
CGGA_681	NA	Male	42	110	1
CGGA_700	WHO IV	Female	24	170	0
CGGA_727	WHO III	Male	45	1023	1
CGGA_731	WHO IV	Male	50	503	1
CGGA_732	WHO III	Female	35	NA	NA
CGGA_766	WHO II	Male	32	4103	0
CGGA_773	WHO IV	Female	51	443	1
CGGA_782	WHO IV	Male	60	289	1
CGGA_789	WHO IV	Male	50	345	1
CGGA_791	WHO III	Male	55	252	1
CGGA_796	WHO II	Male	60	559	0
CGGA_802	WHO IV	Male	42	681	1
CGGA_804	WHO IV	Female	53	614	0
CGGA_807	WHO II	Male	42	4040	0
CGGA_808	WHO IV	Male	38	1167	0
CGGA_837	WHO IV	Male	57	432	1
CGGA_842	WHO IV	Female	63	204	1
CGGA_848	WHO IV	Female	54	239	0
CGGA_850	WHO IV	Female	52	564	0
CGGA_859	WHO IV	Male	56	387	1
CGGA_871	WHO II	Male	37	3964	0
CGGA_876	WHO IV	Female	60	159	1
CGGA_878	WHO IV	Male	42	863	1
CGGA_902	WHO IV	Male	54	193	1
CGGA_D02	WHO IV	Male	44	484	1
CGGA_D03	WHO IV	Male	44	423	1
CGGA_D06	WHO III	Female	49	NA	1
CGGA_D09	WHO IV	Male	57	233	1
CGGA_D11	WHO III	Female	53	827	1
CGGA_D16	WHO III	Female	59	261	1
CGGA_D18	WHO III	Male	20	NA	NA
CGGA_D26	WHO IV	Male	55	263	1
CGGA_D32	WHO IV	Male	61	358	1
CGGA_D35	WHO IV	Female	68	661	1
CGGA_D36	WHO IV	Male	58	34	1
CGGA_D37	WHO IV	Male	55	965	1
CGGA_D44	WHO III	Female	18	313	1
CGGA_D51	WHO IV	Female	60	135	1
CGGA_D57	WHO IV	Male	40	766	1
CGGA_D58	WHO III	Male	24	181	1
CGGA_342	WHO IV	Female	49	500	1
CGGA_719	WHO IV	Male	51	101	1
CGGA_J030	WHO II	Male	38	3389	0
CGGA_J130	WHO II	Male	40	3116	0
CGGA_1005	WHO II	Female	41	3815	0
CGGA_1013	WHO II	Female	38	1725	1
CGGA_1020	WHO II	Female	38	1120	1
CGGA_1027	WHO III	Male	37	2688	0
CGGA_1031	WHO II	Female	31	2457	1
CGGA_1046	WHO II	Male	21	3559	0
CGGA_1050	WHO II	Male	39	NA	0
CGGA_1060	WHO IV	Male	42	227	1
CGGA_1061	WHO III	Female	43	532	1
CGGA_1068	WHO IV	Male	29	68	1
CGGA_1094	WHO III	Female	40	252	1
CGGA_1105	WHO IV	Male	29	609	1
CGGA_1113	WHO III	Male	34	1265	1
CGGA_1129	WHO IV	Male	34	168	1
CGGA_1136	WHO IV	Female	38	236	1
CGGA_1146	WHO III	Male	35	2498	0
CGGA_1160	WHO III	Female	43	426	1
CGGA_1170	WHO IV	Male	25	346	1
CGGA_1175	WHO IV	Female	36	441	1
CGGA_1189	WHO III	Female	34	3082	0
CGGA_1190	WHO III	Female	45	3082	0
CGGA_1215	WHO III	Male	37	29	1
CGGA_1219	WHO IV	Female	57	2120	1
CGGA_1227	WHO IV	Female	46	1197	1
CGGA_1231	WHO III	Female	31	2279	1
CGGA_1287	WHO IV	Male	29	533	1
CGGA_1307	WHO III	Female	25	965	0
CGGA_1314	WHO IV	Female	27	172	1
CGGA_1322	WHO III	Male	10	253	1
CGGA_1324	WHO IV	Male	42	848	1
CGGA_1329	WHO III	Female	43	326	1
CGGA_1330	WHO II	Male	47	2846	0
CGGA_1374	WHO III	Male	22	141	1
CGGA_1375	WHO IV	Female	50	92	1
CGGA_1381	WHO IV	Female	36	46	1
CGGA_1384	WHO IV	Female	39	191	1
CGGA_1388	WHO III	Male	37	485	1
CGGA_1394	WHO IV	Male	37	139	1
CGGA_1406	WHO II	Male	34	2154	1
CGGA_1409	WHO IV	Female	24	2727	0
CGGA_1412	WHO IV	Female	48	296	1
CGGA_171	WHO II	Female	37	NA	NA
CGGA_236	WHO II	Male	47	706	0
CGGA_241	WHO II	Male	34	4809	0
CGGA_245	WHO III	Female	39	318	1
CGGA_251	WHO II	Male	45	1299	0
CGGA_252	WHO II	Female	24	165	0
CGGA_254	WHO II	Male	38	4793	0
CGGA_256	WHO II	Male	39	158	0
CGGA_261	WHO II	Male	27	4130	0
CGGA_267	WHO II	Male	36	1374	1
CGGA_273	WHO II	Female	35	2635	1
CGGA_283	WHO II	Female	47	3470	1
CGGA_300	WHO II	Female	35	2199	1
CGGA_314	WHO III	Male	39	2568	1
CGGA_333	WHO II	Male	40	1783	0
CGGA_337	WHO III	Female	50	1008	1
CGGA_374	WHO IV	Male	37	493	1
CGGA_400	WHO III	Female	38	1321	1
CGGA_431	WHO III	Male	41	4515	0
CGGA_446	WHO II	Female	35	4508	0
CGGA_458	WHO II	Male	51	419	1
CGGA_479	WHO II	Female	36	4445	0
CGGA_485	WHO II	Male	31	2437	0
CGGA_490	WHO III	Female	37	3804	0
CGGA_491	WHO IV	Female	36	1074	1
CGGA_501	WHO II	Male	40	4427	0
CGGA_502	WHO II	Male	39	4414	0
CGGA_510	WHO III	Male	42	4403	0
CGGA_538	WHO II	Female	43	NA	NA
CGGA_543	WHO II	Male	43	4371	0
CGGA_545	WHO IV	Female	38	555	1
CGGA_551	WHO II	Male	44	4363	0
CGGA_560	WHO III	Male	43	4354	0
CGGA_580	WHO II	Male	43	1394	1
CGGA_591	WHO III	Female	50	1654	1
CGGA_598	WHO III	Female	61	3677	1
CGGA_601	WHO II	Male	36	1133	1
CGGA_603	WHO III	Male	32	168	0
CGGA_605	WHO III	Male	43	4300	0
CGGA_607	WHO II	Male	25	1389	0
CGGA_632	WHO II	Female	29	576	1
CGGA_635	WHO II	Male	45	4263	0
CGGA_641	WHO III	Female	51	3411	1
CGGA_642	WHO II	Male	29	4249	0
CGGA_655	WHO II	Male	35	4231	0
CGGA_662	WHO II	Female	59	284	1
CGGA_666	WHO II	Female	45	2499	1
CGGA_671	WHO II	Female	36	4215	0
CGGA_675	WHO II	Female	23	4210	0
CGGA_685	WHO II	Female	20	3239	1
CGGA_689	WHO II	Female	36	4194	0
CGGA_694	WHO II	Male	34	1194	1
CGGA_698	WHO II	Female	61	1851	1
CGGA_704	WHO II	Male	36	2572	1
CGGA_710	WHO IV	Male	41	660	1
CGGA_715	WHO II	Male	43	3429	0
CGGA_725	WHO II	Male	58	4147	0
CGGA_747	WHO IV	Male	29	970	1
CGGA_752	WHO II	Male	39	3680	0
CGGA_757	WHO II	Male	45	1047	1
CGGA_760	WHO II	Female	34	4110	0
CGGA_761	WHO IV	Male	45	1840	1
CGGA_762	WHO II	Female	40	4105	0
CGGA_785	WHO II	Male	43	3517	1
CGGA_812	WHO II	Male	27	4035	0
CGGA_815	WHO II	Female	53	2219	1
CGGA_818	WHO II	Male	46	4027	0
CGGA_822	WHO IV	Male	46	2237	1
CGGA_834	WHO II	Male	24	4013	0
CGGA_835	WHO II	Male	31	517	0
CGGA_838	WHO II	Female	36	4011	0
CGGA_843	WHO II	Male	29	4005	0
CGGA_856	WHO II	Male	53	1297	0
CGGA_858	WHO II	Male	42	3984	0
CGGA_864	WHO II	Male	34	3977	0
CGGA_884	WHO II	Female	48	1131	1
CGGA_892	WHO II	Male	34	448	0
CGGA_893	WHO II	Female	36	3160	1
CGGA_898	WHO II	Male	38	1663	1
CGGA_899	WHO IV	Male	48	231	1
CGGA_904	WHO II	Male	33	774	1
CGGA_905	WHO II	Male	46	3174	1
CGGA_908	WHO II	Male	35	2436	1
CGGA_909	WHO II	Female	39	3920	0
CGGA_D04	WHO II	Male	37	3697	0
CGGA_D07	WHO II	Male	36	3691	0
CGGA_D14	WHO III	Male	27	NA	NA
CGGA_D15	WHO II	Female	38	3669	0
CGGA_D20	WHO II	Female	40	2367	1
CGGA_D21	WHO III	Female	37	1208	1
CGGA_D24	WHO III	Female	37	837	1
CGGA_D27	WHO III	Male	33	3650	0
CGGA_D29	WHO II	Male	36	3643	0
CGGA_D33	WHO III	Male	38	116	1
CGGA_D34	WHO IV	Male	45	147	1
CGGA_D38	WHO IV	Female	41	689	1
CGGA_D39	WHO II	Female	27	NA	NA
CGGA_D40	WHO II	Male	44	3557	0
CGGA_D45	WHO III	Male	32	856	0
CGGA_D46	WHO III	Female	36	300	1
CGGA_D47	WHO II	Male	36	1048	1
CGGA_D48	WHO III	Female	23	221	1
CGGA_D52	WHO III	Male	46	3529	0
CGGA_D56	WHO III	Male	45	64	1
CGGA_D59	WHO IV	Female	30	NA	NA
CGGA_277	WHO III	Male	40	4739	0
CGGA_518	WHO IV	Male	27	212	1
CGGA_J023	WHO III	Male	36	1028	1
CGGA_J024	WHO II	Female	29	3410	0
CGGA_J042	WHO II	Male	38	1409	1
CGGA_J100	WHO IV	Male	55	NA	NA
CGGA_1004	WHO II	Female	63	899	1
CGGA_1008	WHO IV	Female	54	315	1
CGGA_1053	WHO IV	Female	63	370	1
CGGA_1059	WHO II	Female	54	21	1
CGGA_1070	WHO IV	Male	37	333	1
CGGA_1071	WHO II	Male	42	3252	1
CGGA_1073	WHO IV	Female	42	270	1
CGGA_1074	WHO IV	Male	50	86	1
CGGA_1095	NA	Male	29	2778	1
CGGA_1099	WHO IV	Male	8	122	1
CGGA_1114	WHO IV	Male	53	460	1
CGGA_1116	WHO IV	Female	43	248	1
CGGA_1118	WHO III	Male	31	398	1
CGGA_1119	WHO IV	Male	52	422	1
CGGA_1197	WHO IV	Male	43	942	1
CGGA_1246	WHO III	Male	53	2972	0
CGGA_1275	WHO IV	Male	70	183	1
CGGA_1450	WHO IV	Male	37	957	1
CGGA_1460	WHO IV	Male	51	209	1
CGGA_1475	WHO IV	Male	38	182	1
CGGA_243	WHO II	Female	30	2977	0
CGGA_247	WHO III	Male	60	609	1
CGGA_738	WHO II	Male	43	4132	0
CGGA_759	WHO IV	Male	30	1263	1
CGGA_D30	WHO IV	Male	70	215	1
