# Supplementary material for: A cuproptosis-based prognostic model for predicting survival in low-grade glioma
Source: Aging (Albany NY). 2024 May 9;16(10):8697–716. doi: 10.18632/aging.205834 (PMC11164498; doi:10.18632/aging.205834)
Supplement: Supplementary Table 5 [file aging-16-205834-s005.xlsx]

## Sheet: Sheet1
Supplementary Table 5. KEGG enrichment analysis results file.
ID	Description	GeneRatio	BgRatio	pvalue	p.adjust	qvalue	geneID	Count
hsa04512	ECM-receptor interaction	22/227	88/8135	1.37793e-15	3.23813e-13	2.50928e-13	1277/3915/255743/3908/7060/341640/1278/6696/3678/1292/2335/1284/7057/3673/6382/1282/3339/3381/3912/960/3675/3371	22
hsa05150	Staphylococcus aureus infection	21/227	96/8135	1.1175e-13	1.31306e-11	1.01751e-11	718/3113/3119/3111/3118/2214/3122/3426/728/717/2357/715/3115/2212/3127/3075/3123/2359/716/3383/3117	21
hsa04610	Complement and coagulation cascades	19/227	85/8135	1.15225e-12	9.02599e-11	6.99438e-11	7056/718/2152/5329/5265/3426/2162/730/7035/728/717/715/5054/5327/5328/3075/5627/716/710	19
hsa04145	Phagosome	23/227	152/8135	2.50288e-11	1.47044e-09	1.13947e-09	718/84790/23480/4481/3113/7060/84617/3119/3111/9902/3118/2214/3678/3122/7057/3673/81035/715/3115/2212/3127/3123/3117	23
hsa04510	Focal adhesion	26/227	201/8135	4.49233e-11	2.11139e-09	1.63615e-09	2318/1277/3915/857/858/87/3908/7060/1956/1278/6696/7422/4233/3678/1292/2335/1284/7057/3673/1282/2316/3381/3912/80310/3675/3371	26
hsa05164	Influenza A	23/227	171/8135	2.88673e-10	1.13064e-08	8.76148e-09	3576/9021/3113/6347/3119/3111/3118/3122/4939/4599/91543/3627/6352/1021/3115/4940/6772/3127/3123/4261/4938/3383/3117	23
hsa05323	Rheumatoid arthritis	17/227	93/8135	5.44756e-10	1.82882e-08	1.41718e-08	3576/3113/6347/3119/3111/3118/7422/3122/6352/7042/2919/284/3115/3127/3123/3383/3117	17
hsa04933	AGE-RAGE signaling pathway in diabetic complications	17/227	100/8135	1.76564e-09	5.18657e-08	4.01916e-08	7056/3576/2152/1277/6347/7412/1278/7422/1281/2335/1284/7042/5054/1282/6772/1958/3383	17
hsa05205	Proteoglycans in cancer	24/227	205/8135	2.08855e-09	5.45343e-08	4.22595e-08	2318/1277/857/858/8826/5329/1956/1278/7422/4233/3678/8323/4060/2335/7057/3673/7042/6382/4318/5328/3339/2316/4478/960	24
hsa05169	Epstein-Barr virus infection	23/227	202/8135	7.94147e-09	1.86625e-07	1.44618e-07	3113/3119/3111/3118/1017/3122/4939/890/3627/1021/3115/4940/1647/6772/965/3127/7431/3123/4938/3383/960/9636/3117	23
hsa05140	Leishmaniasis	14/227	77/8135	2.055e-08	4.39022e-07	3.40205e-07	718/3113/3119/3111/3118/2214/3122/7042/3115/2212/6772/3127/3123/3117	14
hsa05416	Viral myocarditis	12/227	60/8135	7.14348e-08	1.39893e-06	1.08405e-06	857/3113/3908/3119/3111/3118/3122/3115/3127/3123/3383/3117	12
hsa04640	Hematopoietic cell lineage	15/227	99/8135	8.20521e-08	1.48325e-06	1.14939e-06	3113/3119/3111/3118/3678/933/3122/3673/3115/3127/3123/3554/960/3117/3675	15
hsa05310	Asthma	9/227	31/8135	1.034e-07	1.73564e-06	1.34497e-06	3113/3119/3111/3118/3122/3115/3127/3123/3117	9
hsa05165	Human papillomavirus infection	28/227	331/8135	1.28216e-07	2.00872e-06	1.55659e-06	1277/3915/182/3908/7060/1956/1278/6696/7422/1017/3678/8323/890/4599/1292/2335/1284/7057/3673/3659/1021/1282/6772/3381/3912/9636/3675/3371	28
hsa05322	Systemic lupus erythematosus	17/227	136/8135	2.00622e-07	2.94664e-06	2.2834e-06	718/87/3113/3119/3111/3118/2214/3122/730/717/715/3115/2212/3127/3123/716/3117	17
hsa05145	Toxoplasmosis	15/227	112/8135	4.33357e-07	5.99052e-06	4.64215e-06	3915/3113/3908/3119/3111/3118/3122/7042/3115/6772/3127/3123/4261/3912/3117	15
hsa05152	Tuberculosis	19/227	180/8135	5.60057e-07	7.31185e-06	5.66607e-06	718/3113/3119/3111/9902/3118/2214/3122/972/7096/7042/4046/3115/2212/6772/3127/3123/4261/3117	19
hsa04115	p53 signaling pathway	12/227	73/8135	6.81065e-07	8.28449e-06	6.41978e-06	51512/6241/3486/55240/1017/7057/1021/9133/5054/1647/983/891	12
hsa05330	Allograft rejection	9/227	38/8135	7.05063e-07	8.28449e-06	6.41978e-06	3113/3119/3111/3118/3122/3115/3127/3123/3117	9
hsa04514	Cell adhesion molecules	17/227	149/8135	7.54086e-07	8.36646e-06	6.4833e-06	5788/3113/7412/3119/3111/3118/933/3122/6382/3115/6614/965/3127/3123/4099/3383/3117	17
hsa05146	Amoebiasis	14/227	102/8135	7.83243e-07	8.36646e-06	6.4833e-06	3576/1277/3915/87/3908/1278/1281/2335/1284/7042/2919/1282/3554/3912	14
hsa05166	Human T-cell leukemia virus 1 infection	21/227	222/8135	8.76586e-07	8.95642e-06	6.94047e-06	3113/3119/3111/3118/1017/3122/890/8061/701/7042/1031/9232/9133/3115/3127/1958/3123/3554/991/3383/3117	21
hsa05321	Inflammatory bowel disease	11/227	65/8135	1.48847e-06	1.45746e-05	1.12941e-05	3113/3119/3111/3118/3122/7042/3115/6772/3127/3123/3117	11
hsa04659	Th17 cell differentiation	14/227	108/8135	1.58673e-06	1.49152e-05	1.15581e-05	3113/3556/3119/3111/3118/3122/196/3115/6772/861/3127/3123/3554/3117	14
hsa04151	PI3K-Akt signaling pathway	27/227	354/8135	1.70672e-06	1.52295e-05	1.18016e-05	1277/3915/9180/55970/3908/7060/1956/1278/6696/7422/4233/1017/3678/285/1292/2335/1284/7057/3673/1021/284/1282/3381/3912/80310/3675/3371	27
hsa05332	Graft-versus-host disease	9/227	42/8135	1.74978e-06	1.52295e-05	1.18016e-05	3113/3119/3111/3118/3122/3115/3127/3123/3117	9
hsa04110	Cell cycle	15/227	126/8135	2.00801e-06	1.68529e-05	1.30596e-05	7465/1017/890/8318/701/699/7042/1021/1031/9232/9133/1647/983/991/891	15
hsa04940	Type I diabetes mellitus	9/227	43/8135	2.1598e-06	1.75018e-05	1.35624e-05	3113/3119/3111/3118/3122/3115/3127/3123/3117	9
hsa04672	Intestinal immune network for IgA production	9/227	49/8135	6.80104e-06	5.32748e-05	4.12835e-05	3113/3119/3111/3118/3122/3115/3127/3123/3117	9
hsa05144	Malaria	9/227	50/8135	8.09497e-06	6.13651e-05	4.75528e-05	3576/7060/6347/7412/4233/7057/7042/6382/3383	9
hsa04612	Antigen processing and presentation	11/227	78/8135	9.40118e-06	6.90399e-05	5.35001e-05	3113/3119/3111/3118/3122/972/3115/3127/3123/4261/3117	11
hsa05320	Autoimmune thyroid disease	9/227	53/8135	1.33128e-05	9.48031e-05	7.34645e-05	3113/3119/3111/3118/3122/3115/3127/3123/3117	9
hsa04658	Th1 and Th2 cell differentiation	11/227	92/8135	4.60926e-05	0.000309479	0.00023982	182/3113/3119/3111/3118/3122/3115/6772/3127/3123/3117	11
hsa05222	Small cell lung cancer	11/227	92/8135	4.60926e-05	0.000309479	0.00023982	3915/3908/1017/2335/1284/3673/1021/1647/1282/3912/3675	11
hsa04668	TNF signaling pathway	12/227	112/8135	6.26433e-05	0.000408921	0.00031688	9021/182/6347/7412/3976/3627/3659/6352/2919/4318/4323/3383	12
hsa05171	Coronavirus disease - COVID-19	18/227	232/8135	8.03736e-05	0.000510481	0.00039558	718/3576/6347/1956/4939/2162/730/4599/728/717/3627/715/4940/2212/6772/716/4938/9636	18
hsa04218	Cellular senescence	13/227	156/8135	0.000402501	0.00248915	0.00192888	3576/4605/3486/1017/890/2305/7042/1021/9133/5054/1647/983/891	13
hsa04974	Protein digestion and absorption	10/227	103/8135	0.000572052	0.00344698	0.00267112	1290/1277/1278/1281/1292/7373/1284/1289/1282/1296	10
hsa05219	Bladder cancer	6/227	41/8135	0.00087683	0.00515138	0.00399189	3576/1956/7422/7057/4318/1890	6
hsa05133	Pertussis	8/227	76/8135	0.00119585	0.00685428	0.00531149	718/3576/3678/717/3659/715/716/710	8
hsa05418	Fluid shear stress and atherosclerosis	11/227	139/8135	0.00170078	0.00951624	0.00737429	7056/857/858/6347/7412/7422/6382/4318/5327/3554/3383	11
hsa04621	NOD-like receptor signaling pathway	13/227	184/8135	0.00187511	0.0102477	0.00794111	3576/6347/4939/118429/6352/2919/4940/6772/2634/2633/2635/10135/4938	13
hsa04926	Relaxin signaling pathway	10/227	129/8135	0.00317859	0.0169766	0.0131554	1277/55970/1956/1278/7422/1281/59/1284/4318/1282	10
hsa05160	Hepatitis C	11/227	157/8135	0.00439826	0.0229687	0.0177988	9021/1956/1017/4939/4599/91543/3627/1021/4940/6772/4938	11
hsa04657	IL-17 signaling pathway	8/227	94/8135	0.00460248	0.0235127	0.0182204	3576/6347/6279/8061/3627/2919/4318/6280	8
hsa00240	Pyrimidine metabolism	6/227	58/8135	0.00532765	0.0266382	0.0206424	129607/6241/1806/7298/7083/1890	6
hsa05202	Transcriptional misregulation in cancer	12/227	193/8135	0.00770108	0.0377032	0.0292168	3576/3486/4233/890/8013/1031/4318/597/5327/1647/5328/861	12
hsa04810	Regulation of actin cytoskeleton	13/227	218/8135	0.00792922	0.0380279	0.0294684	87/10788/55970/8826/1956/3678/85477/2335/3673/128239/4478/80310/3675	13
hsa04064	NF-kappa B signaling pathway	8/227	104/8135	0.00840661	0.0395111	0.0306178	3576/7412/2919/597/1647/5328/3554/3383	8
