# Supplementary material for: A cuproptosis-based prognostic model for predicting survival in low-grade glioma
Source: Aging (Albany NY). 2024 May 9;16(10):8697–716. doi: 10.18632/aging.205834 (PMC11164498; doi:10.18632/aging.205834)
Supplement: Supplementary Table 6 [file aging-16-205834-s006.xlsx]

## Sheet: Sheet1
Supplementary Table 6. STRING analysis results file.
#node1	node2	node1_string_id	node2_string_id	neighborhood_on_chromosome	gene_fusion	phylogenetic_cooccurrence	homology	coexpression	experimentally_determined_interaction	database_annotated	automated_textmining	combined_score
ACTN1	PDLIM1	9606.ENSP00000377941	9606.ENSP00000360305	0	0	0	0	0.094	0.842	0	0.672	0.949
ADAMTS1	THBS1	9606.ENSP00000284984	9606.ENSP00000260356	0	0	0	0.545	0.096	0.074	0.9	0.634	0.934
ADAMTS1	ADAMTS15	9606.ENSP00000284984	9606.ENSP00000299164	0	0	0	0.938	0.088	0	0.9	0.731	0.909
ADAMTS15	THBS1	9606.ENSP00000299164	9606.ENSP00000260356	0	0	0	0.544	0.076	0.074	0.9	0.398	0.922
ADAMTS15	ADAMTS1	9606.ENSP00000299164	9606.ENSP00000284984	0	0	0	0.938	0.088	0	0.9	0.731	0.909
AHR	CYP1B1	9606.ENSP00000242057	9606.ENSP00000478561	0	0	0	0	0.096	0.273	0	0.893	0.924
AHR	STAT1	9606.ENSP00000242057	9606.ENSP00000354394	0	0	0	0	0.062	0.182	0	0.988	0.99
ANGPT1	ITGA5	9606.ENSP00000428340	9606.ENSP00000293379	0	0	0	0	0	0.225	0.9	0.233	0.935
ANGPT1	FN1	9606.ENSP00000428340	9606.ENSP00000346839	0	0	0	0	0.061	0.121	0.9	0.639	0.966
ANGPT1	VEGFA	9606.ENSP00000428340	9606.ENSP00000478570	0	0	0	0	0	0.058	0	0.949	0.951
ANGPT2	VEGFA	9606.ENSP00000314897	9606.ENSP00000478570	0	0	0	0	0	0.309	0	0.987	0.991
ANXA1	F13A1	9606.ENSP00000366109	9606.ENSP00000264870	0	0	0	0	0.088	0	0.9	0.185	0.919
ANXA1	S100A11	9606.ENSP00000366109	9606.ENSP00000271638	0	0	0	0	0.432	0.683	0	0.989	0.998
ANXA1	COL1A2	9606.ENSP00000366109	9606.ENSP00000297268	0	0	0	0	0.16	0	0.9	0.17	0.924
ANXA1	FPR3	9606.ENSP00000366109	9606.ENSP00000341821	0	0	0	0	0	0	0.6	0.989	0.995
ANXA1	ANXA2	9606.ENSP00000366109	9606.ENSP00000346032	0	0	0	0.938	0.474	0.365	0.8	0.864	0.931
ANXA1	FN1	9606.ENSP00000366109	9606.ENSP00000346839	0	0	0	0	0.091	0.063	0.9	0.425	0.944
ANXA1	FPR1	9606.ENSP00000366109	9606.ENSP00000471493	0	0	0	0	0.062	0.462	0.6	0.988	0.997
ANXA2	PLAT	9606.ENSP00000346032	9606.ENSP00000220809	0	0	0	0	0.096	0.47	0.9	0.988	0.999
ANXA2	S100A11	9606.ENSP00000346032	9606.ENSP00000271638	0	0	0	0	0.543	0.157	0	0.988	0.995
ANXA2	CAV1	9606.ENSP00000346032	9606.ENSP00000339191	0	0	0	0	0.2	0	0	0.967	0.973
ANXA2	ANXA1	9606.ENSP00000346032	9606.ENSP00000366109	0	0	0	0.938	0.474	0.365	0.8	0.864	0.931
ANXA2	S100A4	9606.ENSP00000346032	9606.ENSP00000357705	0	0	0	0	0.199	0.835	0	0.995	0.999
ARC	EGR1	9606.ENSP00000349022	9606.ENSP00000239938	0	0	0	0	0.064	0	0.9	0.655	0.964
ARC	FOSL1	9606.ENSP00000349022	9606.ENSP00000310170	0	0	0	0	0	0	0.9	0.075	0.903
ARHGAP11A	KIF11	9606.ENSP00000355090	9606.ENSP00000260731	0	0	0	0	0.931	0.078	0	0.251	0.948
ARHGAP11A	CCNA2	9606.ENSP00000355090	9606.ENSP00000274026	0	0	0	0	0.929	0	0	0.093	0.933
ARHGAP11A	BUB1B	9606.ENSP00000355090	9606.ENSP00000287598	0	0	0	0	0.921	0	0	0	0.921
ARHGAP11A	BUB1	9606.ENSP00000355090	9606.ENSP00000302530	0	0	0	0	0.938	0	0	0.123	0.943
ARHGAP11A	MKI67	9606.ENSP00000355090	9606.ENSP00000357643	0	0	0	0	0.896	0	0	0.195	0.912
ARHGAP11A	KIF20A	9606.ENSP00000355090	9606.ENSP00000378356	0	0	0	0	0.91	0.078	0	0.043	0.913
ARHGAP11A	TOP2A	9606.ENSP00000355090	9606.ENSP00000411532	0	0	0	0	0.912	0	0	0.08	0.915
ARHGAP11A	CDK1	9606.ENSP00000355090	9606.ENSP00000378699	0	0	0	0	0.91	0.069	0	0.089	0.917
ASF1B	CCNA2	9606.ENSP00000263382	9606.ENSP00000274026	0	0	0	0	0.883	0.076	0	0.17	0.902
ASF1B	AURKB	9606.ENSP00000263382	9606.ENSP00000313950	0	0	0	0	0.896	0	0	0.172	0.91
ASF1B	RRM2	9606.ENSP00000263382	9606.ENSP00000353770	0	0	0	0	0.843	0.257	0	0.345	0.917
ASF1B	KIF20A	9606.ENSP00000263382	9606.ENSP00000378356	0	0	0	0	0.887	0	0	0.315	0.919
ASF1B	CDC20	9606.ENSP00000263382	9606.ENSP00000361540	0	0	0	0	0.905	0.07	0	0.249	0.928
ASF1B	CDC45	9606.ENSP00000263382	9606.ENSP00000405726	0	0	0	0	0.822	0.056	0	0.651	0.936
ASF1B	CDCA8	9606.ENSP00000263382	9606.ENSP00000362146	0	0	0	0	0.918	0	0	0.32	0.942
ASF1B	CCNB2	9606.ENSP00000263382	9606.ENSP00000288207	0	0	0	0	0.934	0.127	0	0.152	0.947
ASF1B	CHAF1B	9606.ENSP00000263382	9606.ENSP00000315700	0	0	0	0	0.571	0.971	0	0.771	0.997
AURKA	MKI67	9606.ENSP00000216911	9606.ENSP00000357643	0	0	0	0	0.779	0	0	0.578	0.903
AURKA	TYMS	9606.ENSP00000216911	9606.ENSP00000315644	0	0	0	0	0.859	0	0	0.384	0.909
AURKA	NUF2	9606.ENSP00000216911	9606.ENSP00000271452	0	0	0	0	0.74	0.27	0	0.566	0.91
AURKA	RRM2	9606.ENSP00000216911	9606.ENSP00000353770	0	0	0	0	0.825	0	0	0.51	0.91
AURKA	NEK2	9606.ENSP00000216911	9606.ENSP00000355966	0	0	0.361	0.69	0.876	0	0	0.681	0.912
AURKA	FOXM1	9606.ENSP00000216911	9606.ENSP00000342307	0	0	0	0	0.818	0	0	0.577	0.92
AURKA	CENPF	9606.ENSP00000216911	9606.ENSP00000355922	0	0	0	0	0.846	0	0	0.524	0.923
AURKA	PBK	9606.ENSP00000216911	9606.ENSP00000428489	0	0	0	0	0.873	0.075	0	0.419	0.926
AURKA	CDC45	9606.ENSP00000216911	9606.ENSP00000405726	0	0	0	0	0.894	0	0	0.344	0.927
AURKA	MELK	9606.ENSP00000216911	9606.ENSP00000298048	0	0	0	0.738	0.917	0	0	0.571	0.929
AURKA	NCAPH	9606.ENSP00000216911	9606.ENSP00000240423	0	0	0	0	0.832	0.375	0	0.509	0.944
AURKA	ECT2	9606.ENSP00000216911	9606.ENSP00000376457	0	0	0	0	0.886	0.143	0	0.485	0.945
AURKA	CDKN3	9606.ENSP00000216911	9606.ENSP00000335357	0	0	0	0	0.901	0.243	0	0.393	0.95
AURKA	NCAPG	9606.ENSP00000216911	9606.ENSP00000251496	0	0	0	0	0.899	0.103	0	0.524	0.953
AURKA	KIF2C	9606.ENSP00000216911	9606.ENSP00000361298	0	0	0	0	0.865	0.349	0	0.636	0.965
AURKA	BUB1B	9606.ENSP00000216911	9606.ENSP00000287598	0	0	0	0	0.848	0.101	0	0.764	0.965
AURKA	GADD45A	9606.ENSP00000216911	9606.ENSP00000360025	0	0	0	0	0	0.486	0.9	0.385	0.965
AURKA	PRC1	9606.ENSP00000216911	9606.ENSP00000377793	0	0	0	0	0.927	0.13	0	0.545	0.968
AURKA	KIF4A	9606.ENSP00000216911	9606.ENSP00000363524	0	0	0	0	0.919	0.146	0	0.603	0.97
AURKA	NUSAP1	9606.ENSP00000216911	9606.ENSP00000453403	0	0	0	0	0.947	0	0	0.454	0.97
AURKA	TOP2A	9606.ENSP00000216911	9606.ENSP00000411532	0	0	0	0	0.918	0.093	0	0.696	0.975
AURKA	KIF20A	9606.ENSP00000216911	9606.ENSP00000378356	0	0	0	0	0.942	0.146	0	0.564	0.976
AURKA	CDK1	9606.ENSP00000216911	9606.ENSP00000378699	0	0	0.424	0.755	0.965	0.326	0	0.857	0.982
AURKA	NDC80	9606.ENSP00000216911	9606.ENSP00000261597	0	0	0	0	0.909	0.499	0	0.677	0.984
AURKA	CDCA8	9606.ENSP00000216911	9606.ENSP00000362146	0	0	0	0	0.933	0	0.54	0.61	0.987
AURKA	CCNA2	9606.ENSP00000216911	9606.ENSP00000274026	0	0	0	0	0.964	0.104	0	0.625	0.987
AURKA	CCNB1	9606.ENSP00000216911	9606.ENSP00000256442	0	0	0	0	0.926	0.165	0	0.821	0.988
AURKA	UBE2C	9606.ENSP00000216911	9606.ENSP00000348838	0	0	0	0	0.95	0.282	0.3	0.66	0.99
AURKA	KIF15	9606.ENSP00000216911	9606.ENSP00000324020	0	0	0	0	0.755	0.146	0.9	0.638	0.991
AURKA	BUB1	9606.ENSP00000216911	9606.ENSP00000302530	0	0	0	0	0.963	0.101	0	0.817	0.993
AURKA	AURKB	9606.ENSP00000216911	9606.ENSP00000313950	0	0	0.445	0.959	0.925	0.308	0.9	0.912	0.994
AURKA	KIF11	9606.ENSP00000216911	9606.ENSP00000260731	0	0	0	0	0.946	0.417	0	0.869	0.995
AURKA	CCNB2	9606.ENSP00000216911	9606.ENSP00000288207	0	0	0	0	0.972	0.364	0	0.743	0.995
AURKA	PTTG1	9606.ENSP00000216911	9606.ENSP00000377536	0	0	0	0	0.907	0.308	0.9	0.692	0.997
AURKA	BIRC5	9606.ENSP00000216911	9606.ENSP00000301633	0	0	0	0	0.87	0.518	0.9	0.791	0.998
AURKA	CDC20	9606.ENSP00000216911	9606.ENSP00000361540	0	0	0	0	0.974	0.532	0.9	0.878	0.999
AURKA	TPX2	9606.ENSP00000216911	9606.ENSP00000300403	0	0	0	0	0.952	0.978	0.9	0.99	0.999
AURKA	TACC3	9606.ENSP00000216911	9606.ENSP00000326550	0	0	0	0	0.698	0.911	0.9	0.899	0.999
AURKB	TRIP13	9606.ENSP00000313950	9606.ENSP00000166345	0	0	0	0	0.858	0.284	0	0.282	0.92
AURKB	AURKA	9606.ENSP00000313950	9606.ENSP00000216911	0	0	0.445	0.959	0.925	0.308	0.9	0.912	0.994
AURKB	NCAPH	9606.ENSP00000313950	9606.ENSP00000240423	0	0	0	0	0.836	0.524	0.9	0.556	0.996
AURKB	NCAPG	9606.ENSP00000313950	9606.ENSP00000251496	0	0	0	0	0.959	0.103	0.9	0.478	0.997
AURKB	CCNB1	9606.ENSP00000313950	9606.ENSP00000256442	0	0	0	0	0.941	0.165	0	0.821	0.99
AURKB	TROAP	9606.ENSP00000313950	9606.ENSP00000257909	0	0	0	0	0.916	0	0	0.181	0.928
AURKB	KIF11	9606.ENSP00000313950	9606.ENSP00000260731	0	0	0	0	0.959	0.29	0	0.804	0.993
AURKB	NDC80	9606.ENSP00000313950	9606.ENSP00000261597	0	0	0	0	0.957	0.499	0.9	0.874	0.999
AURKB	ASF1B	9606.ENSP00000313950	9606.ENSP00000263382	0	0	0	0	0.896	0	0	0.172	0.91
AURKB	NUF2	9606.ENSP00000313950	9606.ENSP00000271452	0	0	0	0	0.829	0.27	0	0.806	0.973
AURKB	CCNA2	9606.ENSP00000313950	9606.ENSP00000274026	0	0	0	0	0.967	0.104	0	0.672	0.989
AURKB	BUB1B	9606.ENSP00000313950	9606.ENSP00000287598	0	0	0	0	0.918	0.315	0	0.924	0.995
AURKB	CCNB2	9606.ENSP00000313950	9606.ENSP00000288207	0	0	0	0	0.962	0.165	0	0.735	0.991
AURKB	KIAA0101	9606.ENSP00000313950	9606.ENSP00000300035	0	0	0	0	0.922	0	0	0.161	0.932
AURKB	TPX2	9606.ENSP00000313950	9606.ENSP00000300403	0	0	0	0	0.898	0.428	0	0.765	0.985
AURKB	BIRC5	9606.ENSP00000313950	9606.ENSP00000301633	0	0	0	0	0.874	0.933	0.9	0.814	0.999
AURKB	BUB1	9606.ENSP00000313950	9606.ENSP00000302530	0	0	0	0	0.922	0.101	0.9	0.897	0.999
AURKB	GTSE1	9606.ENSP00000313950	9606.ENSP00000415430	0	0	0	0	0.848	0	0	0.369	0.9
AURKB	CDKN3	9606.ENSP00000313950	9606.ENSP00000335357	0	0	0	0	0.804	0.243	0	0.385	0.901
AURKB	PBK	9606.ENSP00000313950	9606.ENSP00000428489	0	0	0	0	0.857	0.075	0	0.375	0.91
AURKB	MKI67	9606.ENSP00000313950	9606.ENSP00000357643	0	0	0	0	0.804	0.27	0	0.481	0.919
AURKB	NEK2	9606.ENSP00000313950	9606.ENSP00000355966	0	0	0.388	0.695	0.888	0	0	0.655	0.92
AURKB	HJURP	9606.ENSP00000313950	9606.ENSP00000414109	0	0	0	0	0.886	0	0	0.37	0.925
AURKB	CENPF	9606.ENSP00000313950	9606.ENSP00000355922	0	0	0	0	0.804	0	0	0.65	0.928
AURKB	VIM	9606.ENSP00000313950	9606.ENSP00000446007	0	0	0	0	0.066	0.27	0.9	0.124	0.932
AURKB	TYMS	9606.ENSP00000313950	9606.ENSP00000315644	0	0	0	0	0.914	0	0	0.292	0.937
AURKB	CDC45	9606.ENSP00000313950	9606.ENSP00000405726	0	0	0	0	0.895	0	0	0.436	0.938
AURKB	ECT2	9606.ENSP00000313950	9606.ENSP00000376457	0	0	0	0	0.813	0.347	0	0.569	0.942
AURKB	FOXM1	9606.ENSP00000313950	9606.ENSP00000342307	0	0	0	0	0.842	0	0	0.694	0.949
AURKB	RRM2	9606.ENSP00000313950	9606.ENSP00000353770	0	0	0	0	0.921	0	0	0.394	0.95
AURKB	KIFC1	9606.ENSP00000313950	9606.ENSP00000393963	0	0	0	0	0.885	0.146	0	0.59	0.956
AURKB	DES	9606.ENSP00000313950	9606.ENSP00000363071	0	0	0	0	0.066	0.487	0.9	0.227	0.958
AURKB	NUSAP1	9606.ENSP00000313950	9606.ENSP00000453403	0	0	0	0	0.93	0	0	0.459	0.96
AURKB	KIF15	9606.ENSP00000313950	9606.ENSP00000324020	0	0	0	0	0.886	0.146	0	0.636	0.961
AURKB	KIF4A	9606.ENSP00000313950	9606.ENSP00000363524	0	0	0	0	0.89	0.146	0	0.71	0.97
AURKB	PRC1	9606.ENSP00000313950	9606.ENSP00000377793	0	0	0	0	0.901	0.337	0	0.597	0.971
AURKB	TACC3	9606.ENSP00000313950	9606.ENSP00000326550	0	0	0	0	0.897	0.244	0	0.703	0.974
AURKB	UBE2C	9606.ENSP00000313950	9606.ENSP00000348838	0	0	0	0	0.933	0.058	0.3	0.584	0.979
AURKB	CDK1	9606.ENSP00000313950	9606.ENSP00000378699	0	0	0.422	0.726	0.959	0.326	0	0.882	0.98
AURKB	TOP2A	9606.ENSP00000313950	9606.ENSP00000411532	0	0	0	0	0.947	0.309	0	0.641	0.985
AURKB	PTTG1	9606.ENSP00000313950	9606.ENSP00000377536	0	0	0	0	0.833	0	0.9	0.69	0.994
AURKB	SMC4	9606.ENSP00000313950	9606.ENSP00000349961	0	0	0	0	0.823	0.128	0.9	0.672	0.994
AURKB	CDC20	9606.ENSP00000313950	9606.ENSP00000361540	0	0	0	0	0.972	0.335	0.6	0.862	0.998
AURKB	CDCA8	9606.ENSP00000313950	9606.ENSP00000362146	0	0	0	0	0.968	0.897	0.9	0.99	0.999
AURKB	KIF20A	9606.ENSP00000313950	9606.ENSP00000378356	0	0	0	0	0.932	0.711	0.9	0.955	0.999
AURKB	KIF2C	9606.ENSP00000313950	9606.ENSP00000361298	0	0	0	0	0.911	0.146	0.9	0.922	0.999
B3GNT7	OGN	9606.ENSP00000287590	9606.ENSP00000262551	0	0	0	0	0.053	0.056	0.9	0.09	0.907
B3GNT7	LUM	9606.ENSP00000287590	9606.ENSP00000266718	0	0	0	0	0.053	0.056	0.9	0.373	0.936
B3GNT7	FMOD	9606.ENSP00000287590	9606.ENSP00000347041	0	0	0	0	0.053	0.056	0.9	0.118	0.91
BIRC5	AURKA	9606.ENSP00000301633	9606.ENSP00000216911	0	0	0	0	0.87	0.518	0.9	0.791	0.998
BIRC5	NCAPG	9606.ENSP00000301633	9606.ENSP00000251496	0	0	0	0	0.892	0.102	0	0.402	0.937
BIRC5	CCNB1	9606.ENSP00000301633	9606.ENSP00000256442	0	0	0	0	0.887	0.153	0	0.683	0.967
BIRC5	KIF11	9606.ENSP00000301633	9606.ENSP00000260731	0	0	0	0	0.951	0.078	0	0.533	0.977
BIRC5	NDC80	9606.ENSP00000301633	9606.ENSP00000261597	0	0	0	0	0.934	0	0	0.474	0.964
BIRC5	NUF2	9606.ENSP00000301633	9606.ENSP00000271452	0	0	0	0	0.839	0	0	0.494	0.915
BIRC5	CCNA2	9606.ENSP00000301633	9606.ENSP00000274026	0	0	0	0	0.921	0.144	0	0.559	0.967
BIRC5	BUB1B	9606.ENSP00000301633	9606.ENSP00000287598	0	0	0	0	0.916	0.124	0	0.603	0.968
BIRC5	CCNB2	9606.ENSP00000301633	9606.ENSP00000288207	0	0	0	0	0.88	0.153	0	0.638	0.96
BIRC5	MELK	9606.ENSP00000301633	9606.ENSP00000298048	0	0	0	0	0.896	0.143	0	0.454	0.947
BIRC5	KIAA0101	9606.ENSP00000301633	9606.ENSP00000300035	0	0	0	0	0.893	0	0	0.345	0.927
BIRC5	TPX2	9606.ENSP00000301633	9606.ENSP00000300403	0	0	0	0	0.931	0	0	0.501	0.964
BIRC5	CCDC8	9606.ENSP00000301633	9606.ENSP00000303158	0	0	0	0	0	0	0.9	0	0.9
BIRC5	HJURP	9606.ENSP00000301633	9606.ENSP00000414109	0	0	0	0	0.888	0	0	0.262	0.913
BIRC5	CENPF	9606.ENSP00000301633	9606.ENSP00000355922	0	0	0	0	0.809	0	0	0.602	0.92
BIRC5	FOXM1	9606.ENSP00000301633	9606.ENSP00000342307	0	0	0	0	0.81	0.059	0	0.601	0.922
BIRC5	PRC1	9606.ENSP00000301633	9606.ENSP00000377793	0	0	0	0	0.849	0.27	0	0.403	0.928
BIRC5	MKI67	9606.ENSP00000301633	9606.ENSP00000357643	0	0	0	0	0.839	0	0	0.612	0.935
BIRC5	TK1	9606.ENSP00000301633	9606.ENSP00000301634	0	0	0	0	0.891	0	0	0.506	0.944
BIRC5	RRM2	9606.ENSP00000301633	9606.ENSP00000353770	0	0	0	0	0.887	0	0	0.557	0.947
BIRC5	NEK2	9606.ENSP00000301633	9606.ENSP00000355966	0	0	0	0	0.893	0.164	0	0.499	0.951
BIRC5	PTTG1	9606.ENSP00000301633	9606.ENSP00000377536	0	0	0	0	0.906	0	0	0.519	0.952
BIRC5	NUSAP1	9606.ENSP00000301633	9606.ENSP00000453403	0	0	0	0	0.908	0	0	0.566	0.958
BIRC5	TOP2A	9606.ENSP00000301633	9606.ENSP00000411532	0	0	0	0	0.884	0	0	0.662	0.959
BIRC5	KIF4A	9606.ENSP00000301633	9606.ENSP00000363524	0	0	0	0	0.911	0.057	0	0.581	0.962
BIRC5	PBK	9606.ENSP00000301633	9606.ENSP00000428489	0	0	0	0	0.959	0.116	0	0.455	0.978
BIRC5	UBE2C	9606.ENSP00000301633	9606.ENSP00000348838	0	0	0	0	0.956	0.112	0	0.638	0.984
BIRC5	CDC20	9606.ENSP00000301633	9606.ENSP00000361540	0	0	0	0	0.963	0.058	0	0.667	0.987
BIRC5	CDK1	9606.ENSP00000301633	9606.ENSP00000378699	0	0	0	0	0.963	0.462	0	0.6	0.991
BIRC5	KIF20A	9606.ENSP00000301633	9606.ENSP00000378356	0	0	0	0	0.88	0.057	0.9	0.449	0.992
BIRC5	KIF2C	9606.ENSP00000301633	9606.ENSP00000361298	0	0	0	0	0.874	0.057	0.9	0.536	0.993
BIRC5	BUB1	9606.ENSP00000301633	9606.ENSP00000302530	0	0	0	0	0.901	0.124	0.9	0.661	0.996
BIRC5	CDCA8	9606.ENSP00000301633	9606.ENSP00000362146	0	0	0	0	0.948	0.908	0.9	0.854	0.999
BIRC5	AURKB	9606.ENSP00000301633	9606.ENSP00000313950	0	0	0	0	0.874	0.933	0.9	0.814	0.999
BUB1	AURKA	9606.ENSP00000302530	9606.ENSP00000216911	0	0	0	0	0.963	0.101	0	0.817	0.993
BUB1	OIP5	9606.ENSP00000302530	9606.ENSP00000220514	0	0	0	0	0.899	0	0	0.261	0.922
BUB1	NCAPH	9606.ENSP00000302530	9606.ENSP00000240423	0	0	0	0	0.916	0	0	0.415	0.949
BUB1	NCAPG	9606.ENSP00000302530	9606.ENSP00000251496	0	0	0	0	0.974	0	0	0.572	0.988
BUB1	CCNB1	9606.ENSP00000302530	9606.ENSP00000256442	0	0	0	0	0.906	0.101	0.9	0.814	0.998
BUB1	KIF11	9606.ENSP00000302530	9606.ENSP00000260731	0	0	0	0	0.989	0.369	0	0.724	0.997
BUB1	NDC80	9606.ENSP00000302530	9606.ENSP00000261597	0	0	0	0	0.968	0.895	0.72	0.851	0.999
BUB1	PLK4	9606.ENSP00000302530	9606.ENSP00000270861	0	0	0	0	0.841	0.268	0	0.546	0.942
BUB1	NUF2	9606.ENSP00000302530	9606.ENSP00000271452	0	0	0	0	0.891	0.77	0	0.811	0.994
BUB1	CCNA2	9606.ENSP00000302530	9606.ENSP00000274026	0	0	0	0	0.97	0.077	0	0.691	0.99
BUB1	BUB1B	9606.ENSP00000302530	9606.ENSP00000287598	0	0	0	0.582	0.918	0.904	0.72	0.988	0.998
BUB1	CCNB2	9606.ENSP00000302530	9606.ENSP00000288207	0	0	0	0	0.975	0.101	0	0.814	0.995
BUB1	MELK	9606.ENSP00000302530	9606.ENSP00000298048	0	0	0	0	0.951	0.057	0	0.601	0.98
BUB1	KIAA0101	9606.ENSP00000302530	9606.ENSP00000300035	0	0	0	0	0.922	0	0	0.186	0.934
BUB1	TPX2	9606.ENSP00000302530	9606.ENSP00000300403	0	0	0	0	0.974	0	0	0.57	0.988
BUB1	BIRC5	9606.ENSP00000302530	9606.ENSP00000301633	0	0	0	0	0.901	0.124	0.9	0.661	0.996
BUB1	FOXM1	9606.ENSP00000302530	9606.ENSP00000342307	0	0	0	0	0.842	0.147	0	0.474	0.923
BUB1	CDKN3	9606.ENSP00000302530	9606.ENSP00000335357	0	0	0	0	0.903	0.056	0	0.292	0.93
BUB1	ARHGAP11A	9606.ENSP00000302530	9606.ENSP00000355090	0	0	0	0	0.938	0	0	0.123	0.943
BUB1	SMC4	9606.ENSP00000302530	9606.ENSP00000349961	0	0	0	0	0.868	0.106	0	0.559	0.943
BUB1	HJURP	9606.ENSP00000302530	9606.ENSP00000414109	0	0	0	0	0.918	0	0	0.366	0.946
BUB1	RRM2	9606.ENSP00000302530	9606.ENSP00000353770	0	0	0	0	0.912	0	0	0.454	0.95
BUB1	PRC1	9606.ENSP00000302530	9606.ENSP00000377793	0	0	0	0	0.919	0	0	0.428	0.952
BUB1	KIF15	9606.ENSP00000302530	9606.ENSP00000324020	0	0	0	0	0.909	0.183	0	0.499	0.959
BUB1	PTTG1	9606.ENSP00000302530	9606.ENSP00000377536	0	0	0	0	0.85	0	0	0.739	0.959
BUB1	SKA3	9606.ENSP00000302530	9606.ENSP00000319417	0	0	0	0	0.759	0	0.72	0.458	0.96
BUB1	KIFC1	9606.ENSP00000302530	9606.ENSP00000393963	0	0	0	0	0.893	0.254	0	0.539	0.96
BUB1	CDC45	9606.ENSP00000302530	9606.ENSP00000405726	0	0	0	0	0.916	0.056	0	0.563	0.962
BUB1	NUSAP1	9606.ENSP00000302530	9606.ENSP00000453403	0	0	0	0	0.93	0	0	0.555	0.967
BUB1	PBK	9606.ENSP00000302530	9606.ENSP00000428489	0	0	0	0	0.944	0.063	0	0.467	0.97
BUB1	NEK2	9606.ENSP00000302530	9606.ENSP00000355966	0	0	0	0	0.931	0	0	0.637	0.973
BUB1	UBE2C	9606.ENSP00000302530	9606.ENSP00000348838	0	0	0	0	0.937	0	0	0.603	0.974
BUB1	MKI67	9606.ENSP00000302530	9606.ENSP00000357643	0	0	0	0	0.952	0	0	0.497	0.975
BUB1	KIF2C	9606.ENSP00000302530	9606.ENSP00000361298	0	0	0	0	0.944	0.183	0	0.786	0.989
BUB1	KIF4A	9606.ENSP00000302530	9606.ENSP00000363524	0	0	0	0	0.959	0.183	0	0.721	0.99
BUB1	TOP2A	9606.ENSP00000302530	9606.ENSP00000411532	0	0	0	0	0.975	0.056	0	0.673	0.991
BUB1	KIF20A	9606.ENSP00000302530	9606.ENSP00000378356	0	0	0	0	0.975	0.378	0	0.547	0.992
BUB1	CENPF	9606.ENSP00000302530	9606.ENSP00000355922	0	0	0	0	0.938	0	0.72	0.918	0.998
BUB1	CDCA8	9606.ENSP00000302530	9606.ENSP00000362146	0	0	0	0	0.935	0	0.9	0.797	0.998
BUB1	AURKB	9606.ENSP00000302530	9606.ENSP00000313950	0	0	0	0	0.922	0.101	0.9	0.897	0.999
BUB1	CDC20	9606.ENSP00000302530	9606.ENSP00000361540	0	0	0	0	0.967	0.964	0	0.984	0.999
BUB1	CDK1	9606.ENSP00000302530	9606.ENSP00000378699	0	0	0	0	0.99	0.4	0.9	0.918	0.999
BUB1B	TRIP13	9606.ENSP00000287598	9606.ENSP00000166345	0	0	0	0	0.807	0.486	0	0.568	0.953
BUB1B	AURKA	9606.ENSP00000287598	9606.ENSP00000216911	0	0	0	0	0.848	0.101	0	0.764	0.965
BUB1B	NCAPH	9606.ENSP00000287598	9606.ENSP00000240423	0	0	0	0	0.844	0	0	0.413	0.904
BUB1B	NCAPG	9606.ENSP00000287598	9606.ENSP00000251496	0	0	0	0	0.901	0	0	0.469	0.945
BUB1B	CCNB1	9606.ENSP00000287598	9606.ENSP00000256442	0	0	0	0	0.937	0.101	0.9	0.809	0.998
BUB1B	TROAP	9606.ENSP00000287598	9606.ENSP00000257909	0	0	0	0	0.875	0	0	0.303	0.909
BUB1B	KIF11	9606.ENSP00000287598	9606.ENSP00000260731	0	0	0	0	0.964	0.369	0	0.769	0.994
BUB1B	NDC80	9606.ENSP00000287598	9606.ENSP00000261597	0	0	0	0	0.923	0.27	0.72	0.859	0.997
BUB1B	PLK4	9606.ENSP00000287598	9606.ENSP00000270861	0	0	0	0	0.746	0.268	0	0.591	0.917
BUB1B	NUF2	9606.ENSP00000287598	9606.ENSP00000271452	0	0	0	0	0.801	0.15	0	0.754	0.954
BUB1B	CCNA2	9606.ENSP00000287598	9606.ENSP00000274026	0	0	0	0	0.931	0.297	0.6	0.674	0.992
BUB1B	KIFC1	9606.ENSP00000287598	9606.ENSP00000393963	0	0	0	0	0.774	0.254	0	0.497	0.908
BUB1B	FOXM1	9606.ENSP00000287598	9606.ENSP00000342307	0	0	0	0	0.814	0.147	0	0.487	0.911
BUB1B	KIF18B	9606.ENSP00000287598	9606.ENSP00000465992	0	0	0	0	0.825	0.183	0	0.436	0.912
BUB1B	SMC4	9606.ENSP00000287598	9606.ENSP00000349961	0	0	0	0	0.848	0.106	0	0.454	0.919
BUB1B	HJURP	9606.ENSP00000287598	9606.ENSP00000414109	0	0	0	0	0.887	0	0	0.321	0.92
BUB1B	ARHGAP11A	9606.ENSP00000287598	9606.ENSP00000355090	0	0	0	0	0.921	0	0	0	0.921
BUB1B	CDC45	9606.ENSP00000287598	9606.ENSP00000405726	0	0	0	0	0.851	0.056	0	0.498	0.923
BUB1B	KIAA0101	9606.ENSP00000287598	9606.ENSP00000300035	0	0	0	0	0.921	0	0	0.318	0.944
BUB1B	MELK	9606.ENSP00000287598	9606.ENSP00000298048	0	0	0	0	0.907	0.057	0	0.527	0.955
BUB1B	KIF15	9606.ENSP00000287598	9606.ENSP00000324020	0	0	0	0	0.919	0.183	0	0.377	0.955
BUB1B	TPX2	9606.ENSP00000287598	9606.ENSP00000300403	0	0	0	0	0.904	0	0	0.557	0.955
BUB1B	PRC1	9606.ENSP00000287598	9606.ENSP00000377793	0	0	0	0	0.925	0	0	0.455	0.957
BUB1B	MKI67	9606.ENSP00000287598	9606.ENSP00000357643	0	0	0	0	0.919	0.27	0	0.366	0.959
BUB1B	NUSAP1	9606.ENSP00000287598	9606.ENSP00000453403	0	0	0	0	0.922	0	0	0.609	0.968
BUB1B	BIRC5	9606.ENSP00000287598	9606.ENSP00000301633	0	0	0	0	0.916	0.124	0	0.603	0.968
BUB1B	PBK	9606.ENSP00000287598	9606.ENSP00000428489	0	0	0	0	0.946	0.063	0	0.509	0.973
BUB1B	KIF20A	9606.ENSP00000287598	9606.ENSP00000378356	0	0	0	0	0.931	0.183	0	0.585	0.974
BUB1B	CDCA8	9606.ENSP00000287598	9606.ENSP00000362146	0	0	0	0	0.926	0	0	0.664	0.974
BUB1B	KIF4A	9606.ENSP00000287598	9606.ENSP00000363524	0	0	0	0	0.94	0.183	0	0.546	0.975
BUB1B	RRM2	9606.ENSP00000287598	9606.ENSP00000353770	0	0	0	0	0.957	0	0	0.508	0.978
BUB1B	KIF2C	9606.ENSP00000287598	9606.ENSP00000361298	0	0	0	0	0.923	0.183	0	0.689	0.978
BUB1B	PTTG1	9606.ENSP00000287598	9606.ENSP00000377536	0	0	0	0	0.82	0.395	0	0.83	0.979
BUB1B	CCNB2	9606.ENSP00000287598	9606.ENSP00000288207	0	0	0	0	0.927	0.101	0	0.77	0.983
BUB1B	TOP2A	9606.ENSP00000287598	9606.ENSP00000411532	0	0	0	0	0.962	0.056	0	0.643	0.986
BUB1B	SKA3	9606.ENSP00000287598	9606.ENSP00000319417	0	0	0	0	0.729	0.177	0.9	0.472	0.986
BUB1B	NEK2	9606.ENSP00000287598	9606.ENSP00000355966	0	0	0	0	0.907	0.27	0.6	0.654	0.989
BUB1B	UBE2C	9606.ENSP00000287598	9606.ENSP00000348838	0	0	0	0	0.903	0.27	0.72	0.715	0.993
BUB1B	AURKB	9606.ENSP00000287598	9606.ENSP00000313950	0	0	0	0	0.918	0.315	0	0.924	0.995
BUB1B	CENPF	9606.ENSP00000287598	9606.ENSP00000355922	0	0	0	0	0.896	0	0.9	0.767	0.997
BUB1B	BUB1	9606.ENSP00000287598	9606.ENSP00000302530	0	0	0	0.582	0.918	0.904	0.72	0.988	0.998
BUB1B	CDC20	9606.ENSP00000287598	9606.ENSP00000361540	0	0	0	0	0.953	0.999	0.8	0.993	0.999
BUB1B	CDK1	9606.ENSP00000287598	9606.ENSP00000378699	0	0	0	0	0.936	0.213	0.9	0.886	0.999
C1R	SERPING1	9606.ENSP00000438615	9606.ENSP00000278407	0	0	0	0	0.698	0.33	0.8	0.986	0.999
C1R	C2	9606.ENSP00000438615	9606.ENSP00000299367	0	0	0	0	0.106	0	0.9	0.511	0.952
C1R	C1S	9606.ENSP00000438615	9606.ENSP00000385035	0	0	0	0.879	0.873	0.972	0.9	0.991	0.999
C1S	SERPING1	9606.ENSP00000385035	9606.ENSP00000278407	0	0	0	0	0.445	0.507	0.8	0.988	0.999
C1S	C2	9606.ENSP00000385035	9606.ENSP00000299367	0	0	0	0.555	0.113	0	0.9	0.572	0.93
C1S	C1R	9606.ENSP00000385035	9606.ENSP00000438615	0	0	0	0.879	0.873	0.972	0.9	0.991	0.999
C2	C3	9606.ENSP00000299367	9606.ENSP00000245907	0	0	0	0	0.148	0.296	0.8	0.762	0.967
C2	CFI	9606.ENSP00000299367	9606.ENSP00000378130	0	0	0	0	0.099	0	0.65	0.737	0.91
C2	C1S	9606.ENSP00000299367	9606.ENSP00000385035	0	0	0	0.555	0.113	0	0.9	0.572	0.93
C2	C1R	9606.ENSP00000299367	9606.ENSP00000438615	0	0	0	0	0.106	0	0.9	0.511	0.952
C3	C5AR1	9606.ENSP00000245907	9606.ENSP00000347197	0	0	0	0	0.063	0.086	0.6	0.833	0.935
C3	SCIN	9606.ENSP00000245907	9606.ENSP00000297029	0	0	0	0	0.063	0	0	0.945	0.947
C3	C2	9606.ENSP00000245907	9606.ENSP00000299367	0	0	0	0	0.148	0.296	0.8	0.762	0.967
C3	CFI	9606.ENSP00000245907	9606.ENSP00000378130	0	0	0	0	0.139	0.974	0.8	0.971	0.999
C3	CFH	9606.ENSP00000245907	9606.ENSP00000356399	0	0	0	0	0.118	0.982	0.8	0.989	0.999
C5AR1	C3	9606.ENSP00000347197	9606.ENSP00000245907	0	0	0	0	0.063	0.086	0.6	0.833	0.935
CAV1	CAV2	9606.ENSP00000339191	9606.ENSP00000222693	0	0	0	0.858	0.82	0.897	0.9	0.994	0.998
CAV1	EGFR	9606.ENSP00000339191	9606.ENSP00000275493	0	0	0	0	0.335	0.881	0.9	0.988	0.999
CAV1	MMP14	9606.ENSP00000339191	9606.ENSP00000308208	0	0	0	0	0.214	0.27	0	0.921	0.951
CAV1	IGFBP3	9606.ENSP00000339191	9606.ENSP00000370473	0	0	0	0	0.3	0.213	0	0.912	0.947
CAV1	ANXA2	9606.ENSP00000339191	9606.ENSP00000346032	0	0	0	0	0.2	0	0	0.967	0.973
CAV1	FLNA	9606.ENSP00000339191	9606.ENSP00000358866	0	0	0	0	0.088	0.213	0	0.988	0.99
CAV2	EGFR	9606.ENSP00000222693	9606.ENSP00000275493	0	0	0	0	0.138	0.803	0.8	0.325	0.974
CAV2	CAV1	9606.ENSP00000222693	9606.ENSP00000339191	0	0	0	0.858	0.82	0.897	0.9	0.994	0.998
CCDC8	BIRC5	9606.ENSP00000303158	9606.ENSP00000301633	0	0	0	0	0	0	0.9	0	0.9
CCL2	LIF	9606.ENSP00000225831	9606.ENSP00000249075	0	0	0	0	0.098	0	0.9	0.506	0.951
CCL2	CCL5	9606.ENSP00000225831	9606.ENSP00000474412	0	0	0	0.831	0.066	0.45	0.9	0.931	0.952
CCL2	CXCL1	9606.ENSP00000225831	9606.ENSP00000379110	0	0	0	0	0.211	0	0.9	0.883	0.989
CCL2	CXCL10	9606.ENSP00000225831	9606.ENSP00000305651	0	0	0	0	0.16	0	0.9	0.91	0.991
CCL2	CXCL8	9606.ENSP00000225831	9606.ENSP00000306512	0	0	0	0	0.271	0.28	0.9	0.923	0.995
CCL5	CCL2	9606.ENSP00000474412	9606.ENSP00000225831	0	0	0	0.831	0.066	0.45	0.9	0.931	0.952
CCL5	LIF	9606.ENSP00000474412	9606.ENSP00000249075	0	0	0	0	0	0	0.9	0.457	0.943
CCL5	CXCL10	9606.ENSP00000474412	9606.ENSP00000305651	0	0	0	0	0.306	0.248	0.6	0.908	0.978
CCL5	CXCL8	9606.ENSP00000474412	9606.ENSP00000306512	0	0	0	0	0.065	0.281	0.6	0.888	0.966
CCL5	SDC1	9606.ENSP00000474412	9606.ENSP00000370542	0	0	0	0	0.062	0.27	0.9	0.455	0.957
CCL5	CXCL1	9606.ENSP00000474412	9606.ENSP00000379110	0	0	0	0	0.063	0.056	0.6	0.887	0.954
CCL5	CD44	9606.ENSP00000474412	9606.ENSP00000398632	0	0	0	0	0.062	0	0	0.954	0.955
CCNA2	TRIP13	9606.ENSP00000274026	9606.ENSP00000166345	0	0	0	0	0.905	0.169	0	0.203	0.932
CCNA2	AURKA	9606.ENSP00000274026	9606.ENSP00000216911	0	0	0	0	0.964	0.104	0	0.625	0.987
CCNA2	MYBL2	9606.ENSP00000274026	9606.ENSP00000217026	0	0	0	0	0.59	0.307	0.8	0.653	0.977
CCNA2	OIP5	9606.ENSP00000274026	9606.ENSP00000220514	0	0	0	0	0.872	0	0	0.355	0.914
CCNA2	NCAPH	9606.ENSP00000274026	9606.ENSP00000240423	0	0	0	0	0.838	0	0	0.409	0.9
CCNA2	NCAPG	9606.ENSP00000274026	9606.ENSP00000251496	0	0	0	0	0.958	0	0	0.461	0.976
CCNA2	CCNB1	9606.ENSP00000274026	9606.ENSP00000256442	0	0	0	0.738	0.969	0.54	0.72	0.915	0.996
CCNA2	KIF11	9606.ENSP00000274026	9606.ENSP00000260731	0	0	0	0	0.976	0.139	0	0.526	0.989
CCNA2	NDC80	9606.ENSP00000274026	9606.ENSP00000261597	0	0	0	0	0.967	0	0	0.357	0.978
CCNA2	ASF1B	9606.ENSP00000274026	9606.ENSP00000263382	0	0	0	0	0.883	0.076	0	0.17	0.902
CCNA2	CDK6	9606.ENSP00000274026	9606.ENSP00000265734	0	0.003	0	0	0.162	0.413	0.72	0.876	0.98
CCNA2	CDK2	9606.ENSP00000274026	9606.ENSP00000266970	0	0.006	0	0	0.401	0.999	0.9	0.995	0.999
CCNA2	PLK4	9606.ENSP00000274026	9606.ENSP00000270861	0	0	0	0	0.829	0.082	0	0.441	0.904
CCNA2	NUF2	9606.ENSP00000274026	9606.ENSP00000271452	0	0	0	0	0.879	0	0	0.374	0.921
CCNA2	KIFC1	9606.ENSP00000274026	9606.ENSP00000393963	0	0	0	0	0.849	0.139	0	0.335	0.906
CCNA2	TYMS	9606.ENSP00000274026	9606.ENSP00000315644	0	0	0	0	0.837	0	0	0.456	0.907
CCNA2	SMC4	9606.ENSP00000274026	9606.ENSP00000349961	0	0	0	0	0.819	0.06	0	0.507	0.909
CCNA2	HJURP	9606.ENSP00000274026	9606.ENSP00000414109	0	0	0	0	0.904	0	0	0.264	0.926
CCNA2	CDC45	9606.ENSP00000274026	9606.ENSP00000405726	0	0	0	0	0.818	0.078	0	0.603	0.927
CCNA2	DTL	9606.ENSP00000274026	9606.ENSP00000355958	0	0	0	0	0.825	0.27	0	0.486	0.928
CCNA2	TACC3	9606.ENSP00000274026	9606.ENSP00000326550	0	0	0	0	0.916	0	0	0.213	0.931
CCNA2	ARHGAP11A	9606.ENSP00000274026	9606.ENSP00000355090	0	0	0	0	0.929	0	0	0.093	0.933
CCNA2	SHCBP1	9606.ENSP00000274026	9606.ENSP00000306473	0	0	0	0	0.926	0	0	0.258	0.943
CCNA2	ECT2	9606.ENSP00000274026	9606.ENSP00000376457	0	0	0	0	0.936	0.073	0	0.205	0.949
CCNA2	CENPF	9606.ENSP00000274026	9606.ENSP00000355922	0	0	0	0	0.909	0	0	0.499	0.952
CCNA2	KIF4A	9606.ENSP00000274026	9606.ENSP00000363524	0	0	0	0	0.921	0.139	0	0.382	0.954
CCNA2	TPX2	9606.ENSP00000274026	9606.ENSP00000300403	0	0	0	0	0.927	0	0	0.426	0.956
CCNA2	MKI67	9606.ENSP00000274026	9606.ENSP00000357643	0	0	0	0	0.92	0	0	0.484	0.957
CCNA2	KIF15	9606.ENSP00000274026	9606.ENSP00000324020	0	0	0	0	0.933	0.139	0	0.315	0.957
CCNA2	PTTG1	9606.ENSP00000274026	9606.ENSP00000377536	0	0	0	0	0.896	0	0	0.634	0.96
CCNA2	PRC1	9606.ENSP00000274026	9606.ENSP00000377793	0	0	0	0	0.926	0.321	0	0.281	0.961
CCNA2	MELK	9606.ENSP00000274026	9606.ENSP00000298048	0	0	0	0	0.93	0.155	0	0.393	0.961
CCNA2	RRM2	9606.ENSP00000274026	9606.ENSP00000353770	0	0	0	0	0.93	0	0	0.522	0.965
CCNA2	KIF2C	9606.ENSP00000274026	9606.ENSP00000361298	0	0	0	0	0.932	0.139	0	0.468	0.966
CCNA2	BIRC5	9606.ENSP00000274026	9606.ENSP00000301633	0	0	0	0	0.921	0.144	0	0.559	0.967
CCNA2	KIAA0101	9606.ENSP00000274026	9606.ENSP00000300035	0	0	0	0	0.959	0	0	0.249	0.967
CCNA2	NEK2	9606.ENSP00000274026	9606.ENSP00000355966	0	0	0	0	0.918	0	0	0.621	0.967
CCNA2	PBK	9606.ENSP00000274026	9606.ENSP00000428489	0	0	0	0	0.949	0.103	0	0.361	0.968
CCNA2	KIF20A	9606.ENSP00000274026	9606.ENSP00000378356	0	0	0	0	0.938	0.139	0	0.468	0.969
CCNA2	CDKN3	9606.ENSP00000274026	9606.ENSP00000335357	0	0	0	0	0.886	0.085	0	0.79	0.976
CCNA2	WEE1	9606.ENSP00000274026	9606.ENSP00000402084	0	0	0	0	0.213	0.216	0.9	0.714	0.98
CCNA2	CDCA8	9606.ENSP00000274026	9606.ENSP00000362146	0	0	0	0	0.973	0	0	0.477	0.985
CCNA2	TOP2A	9606.ENSP00000274026	9606.ENSP00000411532	0	0	0	0	0.967	0.056	0	0.575	0.985
CCNA2	AURKB	9606.ENSP00000274026	9606.ENSP00000313950	0	0	0	0	0.967	0.104	0	0.672	0.989
CCNA2	CCNB2	9606.ENSP00000274026	9606.ENSP00000288207	0	0	0	0.743	0.968	0.181	0.54	0.837	0.989
CCNA2	NUSAP1	9606.ENSP00000274026	9606.ENSP00000453403	0	0	0	0	0.981	0	0	0.455	0.989
CCNA2	BUB1	9606.ENSP00000274026	9606.ENSP00000302530	0	0	0	0	0.97	0.077	0	0.691	0.99
CCNA2	BUB1B	9606.ENSP00000274026	9606.ENSP00000287598	0	0	0	0	0.931	0.297	0.6	0.674	0.992
CCNA2	FOXM1	9606.ENSP00000274026	9606.ENSP00000342307	0	0	0	0	0.864	0.103	0.9	0.608	0.994
CCNA2	UBE2C	9606.ENSP00000274026	9606.ENSP00000348838	0	0	0	0	0.955	0.346	0.6	0.652	0.995
CCNA2	CDK1	9606.ENSP00000274026	9606.ENSP00000378699	0	0.007	0	0	0.985	0.929	0.9	0.992	0.999
CCNA2	CDC20	9606.ENSP00000274026	9606.ENSP00000361540	0	0	0	0	0.984	0.979	0.6	0.926	0.999
CCNB1	AURKA	9606.ENSP00000256442	9606.ENSP00000216911	0	0	0	0	0.926	0.165	0	0.821	0.988
CCNB1	MYBL2	9606.ENSP00000256442	9606.ENSP00000217026	0	0	0	0	0.575	0.156	0.9	0.624	0.984
CCNB1	OIP5	9606.ENSP00000256442	9606.ENSP00000220514	0	0	0	0	0.902	0	0	0.176	0.916
CCNB1	NCAPH	9606.ENSP00000256442	9606.ENSP00000240423	0	0	0	0	0.764	0	0.9	0.377	0.984
CCNB1	NCAPG	9606.ENSP00000256442	9606.ENSP00000251496	0	0	0	0	0.868	0	0.9	0.621	0.994
CCNB1	KIF15	9606.ENSP00000256442	9606.ENSP00000324020	0	0	0	0	0.835	0.139	0	0.401	0.907
CCNB1	CDC45	9606.ENSP00000256442	9606.ENSP00000405726	0	0	0	0	0.803	0.102	0	0.519	0.908
CCNB1	MKI67	9606.ENSP00000256442	9606.ENSP00000357643	0	0	0	0	0.791	0	0	0.635	0.92
CCNB1	KIAA0101	9606.ENSP00000256442	9606.ENSP00000300035	0	0	0	0	0.892	0	0	0.308	0.922
CCNB1	SKA3	9606.ENSP00000256442	9606.ENSP00000319417	0	0	0	0	0.651	0	0.72	0.298	0.925
CCNB1	NUSAP1	9606.ENSP00000256442	9606.ENSP00000453403	0	0	0	0	0.884	0	0	0.504	0.94
CCNB1	CDKN3	9606.ENSP00000256442	9606.ENSP00000335357	0	0	0	0	0.867	0.153	0	0.598	0.951
CCNB1	NEK2	9606.ENSP00000256442	9606.ENSP00000355966	0	0	0	0	0.897	0	0	0.595	0.956
CCNB1	KIF4A	9606.ENSP00000256442	9606.ENSP00000363524	0	0	0	0	0.888	0.139	0	0.586	0.957
CCNB1	RRM2	9606.ENSP00000256442	9606.ENSP00000353770	0	0	0	0	0.902	0	0	0.593	0.958
CCNB1	MELK	9606.ENSP00000256442	9606.ENSP00000298048	0	0	0	0	0.921	0.183	0	0.471	0.963
CCNB1	BIRC5	9606.ENSP00000256442	9606.ENSP00000301633	0	0	0	0	0.887	0.153	0	0.683	0.967
CCNB1	LMNB1	9606.ENSP00000256442	9606.ENSP00000261366	0	0	0	0	0.463	0	0.9	0.452	0.968
CCNB1	KIF2C	9606.ENSP00000256442	9606.ENSP00000361298	0	0	0	0	0.929	0.139	0	0.543	0.969
CCNB1	GTSE1	9606.ENSP00000256442	9606.ENSP00000415430	0	0	0	0	0.608	0	0.9	0.383	0.973
CCNB1	TPX2	9606.ENSP00000256442	9606.ENSP00000300403	0	0	0	0	0.945	0	0	0.523	0.973
CCNB1	PBK	9606.ENSP00000256442	9606.ENSP00000428489	0	0	0	0	0.936	0.263	0	0.494	0.974
CCNB1	SMC4	9606.ENSP00000256442	9606.ENSP00000349961	0	0	0	0	0.617	0.06	0.9	0.428	0.976
CCNB1	PRC1	9606.ENSP00000256442	9606.ENSP00000377793	0	0	0	0	0.938	0.365	0	0.55	0.98
CCNB1	PTTG1	9606.ENSP00000256442	9606.ENSP00000377536	0	0	0	0	0.929	0	0	0.792	0.984
CCNB1	CENPF	9606.ENSP00000256442	9606.ENSP00000355922	0	0	0	0	0.849	0	0.72	0.661	0.984
CCNB1	CDK6	9606.ENSP00000256442	9606.ENSP00000265734	0	0	0	0	0.151	0.23	0.9	0.809	0.985
CCNB1	CDCA8	9606.ENSP00000256442	9606.ENSP00000362146	0	0	0	0	0.968	0	0	0.553	0.985
CCNB1	KIF20A	9606.ENSP00000256442	9606.ENSP00000378356	0	0	0	0	0.964	0.139	0	0.611	0.986
CCNB1	KIF11	9606.ENSP00000256442	9606.ENSP00000260731	0	0	0	0	0.935	0.248	0	0.758	0.987
CCNB1	TOP2A	9606.ENSP00000256442	9606.ENSP00000411532	0	0	0	0	0.964	0.056	0	0.689	0.988
CCNB1	WEE1	9606.ENSP00000256442	9606.ENSP00000402084	0	0	0	0	0.213	0.216	0.9	0.839	0.988
CCNB1	AURKB	9606.ENSP00000256442	9606.ENSP00000313950	0	0	0	0	0.941	0.165	0	0.821	0.99
CCNB1	GADD45A	9606.ENSP00000256442	9606.ENSP00000360025	0	0	0	0	0	0.27	0.9	0.882	0.99
CCNB1	NDC80	9606.ENSP00000256442	9606.ENSP00000261597	0	0	0	0	0.916	0.271	0.72	0.593	0.992
CCNB1	UBE2C	9606.ENSP00000256442	9606.ENSP00000348838	0	0	0	0	0.922	0.346	0.6	0.716	0.993
CCNB1	CCNA2	9606.ENSP00000256442	9606.ENSP00000274026	0	0	0	0.738	0.969	0.54	0.72	0.915	0.996
CCNB1	FOXM1	9606.ENSP00000256442	9606.ENSP00000342307	0	0	0	0	0.81	0.519	0.9	0.719	0.997
CCNB1	BUB1B	9606.ENSP00000256442	9606.ENSP00000287598	0	0	0	0	0.937	0.101	0.9	0.809	0.998
CCNB1	CCNB2	9606.ENSP00000256442	9606.ENSP00000288207	0	0	0	0.943	0.955	0.754	0.9	0.856	0.998
CCNB1	BUB1	9606.ENSP00000256442	9606.ENSP00000302530	0	0	0	0	0.906	0.101	0.9	0.814	0.998
CCNB1	CDC20	9606.ENSP00000256442	9606.ENSP00000361540	0	0	0	0	0.971	0.97	0.6	0.947	0.999
CCNB1	CDK2	9606.ENSP00000256442	9606.ENSP00000266970	0	0	0	0	0.421	0.982	0.9	0.991	0.999
CCNB1	CDK1	9606.ENSP00000256442	9606.ENSP00000378699	0	0	0	0	0.968	0.999	0.9	0.995	0.999
CCNB2	AURKA	9606.ENSP00000288207	9606.ENSP00000216911	0	0	0	0	0.972	0.364	0	0.743	0.995
CCNB2	MYBL2	9606.ENSP00000288207	9606.ENSP00000217026	0	0	0	0	0.603	0.156	0.9	0.479	0.98
CCNB2	NCAPH	9606.ENSP00000288207	9606.ENSP00000240423	0	0	0	0	0.824	0	0.9	0.38	0.988
CCNB2	NCAPG	9606.ENSP00000288207	9606.ENSP00000251496	0	0	0	0	0.936	0	0.9	0.517	0.996
CCNB2	CCNB1	9606.ENSP00000288207	9606.ENSP00000256442	0	0	0	0.943	0.955	0.754	0.9	0.856	0.998
CCNB2	KIF11	9606.ENSP00000288207	9606.ENSP00000260731	0	0	0	0	0.964	0.248	0	0.733	0.992
CCNB2	NDC80	9606.ENSP00000288207	9606.ENSP00000261597	0	0	0	0	0.959	0	0	0.441	0.976
CCNB2	ASF1B	9606.ENSP00000288207	9606.ENSP00000263382	0	0	0	0	0.934	0.127	0	0.152	0.947
CCNB2	CDK6	9606.ENSP00000288207	9606.ENSP00000265734	0	0	0	0	0.153	0.23	0.9	0.671	0.975
CCNB2	CDK2	9606.ENSP00000288207	9606.ENSP00000266970	0	0	0	0	0.448	0.917	0.9	0.746	0.998
CCNB2	PLK4	9606.ENSP00000288207	9606.ENSP00000270861	0	0	0	0	0.801	0.082	0	0.517	0.904
CCNB2	NUF2	9606.ENSP00000288207	9606.ENSP00000271452	0	0	0	0	0.886	0	0	0.424	0.932
CCNB2	CCNA2	9606.ENSP00000288207	9606.ENSP00000274026	0	0	0	0.743	0.968	0.181	0.54	0.837	0.989
CCNB2	BUB1B	9606.ENSP00000288207	9606.ENSP00000287598	0	0	0	0	0.927	0.101	0	0.77	0.983
CCNB2	ECT2	9606.ENSP00000288207	9606.ENSP00000376457	0	0	0	0	0.86	0.099	0	0.362	0.912
CCNB2	HJURP	9606.ENSP00000288207	9606.ENSP00000414109	0	0	0	0	0.901	0	0	0.247	0.922
CCNB2	CDKN3	9606.ENSP00000288207	9606.ENSP00000335357	0	0	0	0	0.858	0.153	0	0.404	0.922
CCNB2	MKI67	9606.ENSP00000288207	9606.ENSP00000357643	0	0	0	0	0.857	0	0	0.493	0.924
CCNB2	KIF15	9606.ENSP00000288207	9606.ENSP00000324020	0	0	0	0	0.889	0.139	0	0.465	0.944
CCNB2	KIFC1	9606.ENSP00000288207	9606.ENSP00000393963	0	0	0	0	0.885	0.18	0	0.481	0.946
CCNB2	CDC45	9606.ENSP00000288207	9606.ENSP00000405726	0	0	0	0	0.865	0.102	0	0.601	0.947
CCNB2	KIAA0101	9606.ENSP00000288207	9606.ENSP00000300035	0	0	0	0	0.936	0	0	0.294	0.953
CCNB2	CENPF	9606.ENSP00000288207	9606.ENSP00000355922	0	0	0	0	0.901	0	0	0.588	0.957
CCNB2	BIRC5	9606.ENSP00000288207	9606.ENSP00000301633	0	0	0	0	0.88	0.153	0	0.638	0.96
CCNB2	RRM2	9606.ENSP00000288207	9606.ENSP00000353770	0	0	0	0	0.909	0	0	0.587	0.961
CCNB2	MELK	9606.ENSP00000288207	9606.ENSP00000298048	0	0	0	0	0.918	0.183	0	0.523	0.965
CCNB2	TPX2	9606.ENSP00000288207	9606.ENSP00000300403	0	0	0	0	0.934	0	0	0.5	0.965
CCNB2	KIF2C	9606.ENSP00000288207	9606.ENSP00000361298	0	0	0	0	0.913	0.139	0	0.581	0.966
CCNB2	KIF4A	9606.ENSP00000288207	9606.ENSP00000363524	0	0	0	0	0.922	0.139	0	0.534	0.966
CCNB2	PRC1	9606.ENSP00000288207	9606.ENSP00000377793	0	0	0	0	0.904	0.167	0	0.613	0.966
CCNB2	PBK	9606.ENSP00000288207	9606.ENSP00000428489	0	0	0	0	0.95	0.103	0	0.391	0.97
CCNB2	CDCA8	9606.ENSP00000288207	9606.ENSP00000362146	0	0	0	0	0.936	0	0	0.591	0.972
CCNB2	PTTG1	9606.ENSP00000288207	9606.ENSP00000377536	0	0	0	0	0.934	0	0	0.631	0.974
CCNB2	SMC4	9606.ENSP00000288207	9606.ENSP00000349961	0	0	0	0	0.607	0.06	0.9	0.438	0.976
CCNB2	NUSAP1	9606.ENSP00000288207	9606.ENSP00000453403	0	0	0	0	0.956	0	0	0.563	0.98
CCNB2	NEK2	9606.ENSP00000288207	9606.ENSP00000355966	0	0	0	0	0.956	0	0	0.564	0.98
CCNB2	KIF20A	9606.ENSP00000288207	9606.ENSP00000378356	0	0	0	0	0.952	0.139	0	0.624	0.983
CCNB2	GTSE1	9606.ENSP00000288207	9606.ENSP00000415430	0	0	0	0	0.79	0	0.9	0.48	0.988
CCNB2	TOP2A	9606.ENSP00000288207	9606.ENSP00000411532	0	0	0	0	0.969	0.056	0	0.714	0.991
CCNB2	AURKB	9606.ENSP00000288207	9606.ENSP00000313950	0	0	0	0	0.962	0.165	0	0.735	0.991
CCNB2	FOXM1	9606.ENSP00000288207	9606.ENSP00000342307	0	0	0	0	0.819	0.103	0.9	0.568	0.992
CCNB2	UBE2C	9606.ENSP00000288207	9606.ENSP00000348838	0	0	0	0	0.976	0.142	0	0.692	0.993
CCNB2	BUB1	9606.ENSP00000288207	9606.ENSP00000302530	0	0	0	0	0.975	0.101	0	0.814	0.995
CCNB2	CDC20	9606.ENSP00000288207	9606.ENSP00000361540	0	0	0	0	0.988	0.672	0.6	0.894	0.999
CCNB2	CDK1	9606.ENSP00000288207	9606.ENSP00000378699	0	0	0	0	0.993	0.971	0.9	0.993	0.999
CD22	PTPRC	9606.ENSP00000085219	9606.ENSP00000411355	0	0	0	0	0.18	0.683	0.8	0.988	0.999
CD248	FN1	9606.ENSP00000308117	9606.ENSP00000346839	0	0	0	0	0.147	0	0	0.984	0.987
CD44	CD74	9606.ENSP00000398632	9606.ENSP00000009530	0	0	0	0	0.09	0.676	0.72	0.989	0.998
CD44	TIMP1	9606.ENSP00000398632	9606.ENSP00000218388	0	0	0	0	0.158	0	0	0.952	0.958
CD44	ICAM1	9606.ENSP00000398632	9606.ENSP00000264832	0	0	0	0	0.098	0	0	0.904	0.909
CD44	IQGAP1	9606.ENSP00000398632	9606.ENSP00000268182	0	0	0	0	0.109	0.27	0.8	0.968	0.995
CD44	EGFR	9606.ENSP00000398632	9606.ENSP00000275493	0	0	0	0	0.099	0.753	0	0.989	0.997
CD44	PDPN	9606.ENSP00000398632	9606.ENSP00000294489	0	0	0	0	0.063	0	0	0.92	0.923
CD44	VCAM1	9606.ENSP00000398632	9606.ENSP00000294728	0	0	0	0	0.063	0	0	0.95	0.952
CD44	MMP14	9606.ENSP00000398632	9606.ENSP00000308208	0	0	0	0	0.111	0	0	0.988	0.989
CD44	MET	9606.ENSP00000398632	9606.ENSP00000317272	0	0	0	0	0.075	0.483	0	0.987	0.993
CD44	FN1	9606.ENSP00000398632	9606.ENSP00000346839	0	0	0	0	0.062	0.27	0.8	0.989	0.998
CD44	MSN	9606.ENSP00000398632	9606.ENSP00000353408	0	0	0	0	0.184	0.563	0	0.988	0.995
CD44	MMP9	9606.ENSP00000398632	9606.ENSP00000361405	0	0	0	0	0	0.213	0.6	0.989	0.996
CD44	SPP1	9606.ENSP00000398632	9606.ENSP00000378517	0	0	0	0	0.062	0.627	0.8	0.989	0.999
CD44	PTPRC	9606.ENSP00000398632	9606.ENSP00000411355	0	0	0	0	0.083	0.341	0	0.887	0.926
CD44	CCL5	9606.ENSP00000398632	9606.ENSP00000474412	0	0	0	0	0.062	0	0	0.954	0.955
CD74	CTSC	9606.ENSP00000009530	9606.ENSP00000227266	0	0	0	0	0.076	0	0.9	0.251	0.924
CD74	HLA-DPB1	9606.ENSP00000009530	9606.ENSP00000408146	0	0	0	0	0.35	0.387	0.6	0.582	0.924
CD74	HLA-DQA2	9606.ENSP00000009530	9606.ENSP00000364076	0	0	0	0	0.597	0.343	0.6	0.481	0.937
CD74	HLA-DRB5	9606.ENSP00000009530	9606.ENSP00000364114	0	0	0	0	0.769	0.173	0.6	0.369	0.945
CD74	HLA-DOA	9606.ENSP00000009530	9606.ENSP00000229829	0	0	0	0	0.171	0.152	0.9	0.343	0.947
CD74	HLA-DQB1	9606.ENSP00000009530	9606.ENSP00000364080	0	0	0	0	0.708	0.473	0.6	0.562	0.969
CD74	HLA-DQB2	9606.ENSP00000009530	9606.ENSP00000390431	0	0	0	0	0.815	0.061	0.6	0.667	0.973
CD74	HLA-DPA1	9606.ENSP00000009530	9606.ENSP00000393566	0	0	0	0	0.817	0.372	0.6	0.619	0.98
CD74	HLA-DQA1	9606.ENSP00000009530	9606.ENSP00000339398	0	0	0	0	0.589	0.747	0.6	0.67	0.984
CD74	HLA-DRB1	9606.ENSP00000009530	9606.ENSP00000353099	0	0	0	0	0.871	0.173	0.9	0.535	0.994
CD74	CD44	9606.ENSP00000009530	9606.ENSP00000398632	0	0	0	0	0.09	0.676	0.72	0.989	0.998
CD74	HLA-DRA	9606.ENSP00000009530	9606.ENSP00000378786	0	0	0	0	0.919	0.868	0.9	0.629	0.999
CDC20	TRIP13	9606.ENSP00000361540	9606.ENSP00000166345	0	0	0	0	0.9	0.958	0	0.669	0.998
CDC20	AURKA	9606.ENSP00000361540	9606.ENSP00000216911	0	0	0	0	0.974	0.532	0.9	0.878	0.999
CDC20	NCAPH	9606.ENSP00000361540	9606.ENSP00000240423	0	0	0	0	0.906	0	0	0.382	0.939
CDC20	FAM64A	9606.ENSP00000361540	9606.ENSP00000250056	0	0	0	0	0.872	0	0	0.366	0.915
CDC20	NCAPG	9606.ENSP00000361540	9606.ENSP00000251496	0	0	0	0	0.948	0.056	0	0.547	0.976
CDC20	CCNB1	9606.ENSP00000361540	9606.ENSP00000256442	0	0	0	0	0.971	0.97	0.6	0.947	0.999
CDC20	TROAP	9606.ENSP00000361540	9606.ENSP00000257909	0	0	0	0	0.92	0	0	0.202	0.933
CDC20	KIF11	9606.ENSP00000361540	9606.ENSP00000260731	0	0	0	0	0.981	0.243	0	0.717	0.995
CDC20	NDC80	9606.ENSP00000361540	9606.ENSP00000261597	0	0	0	0	0.973	0.056	0	0.731	0.992
CDC20	ASF1B	9606.ENSP00000361540	9606.ENSP00000263382	0	0	0	0	0.905	0.07	0	0.249	0.928
CDC20	CDK2	9606.ENSP00000361540	9606.ENSP00000266970	0	0	0	0	0.436	0.918	0	0.745	0.987
CDC20	NUF2	9606.ENSP00000361540	9606.ENSP00000271452	0	0	0	0	0.914	0.056	0	0.623	0.967
CDC20	CCNA2	9606.ENSP00000361540	9606.ENSP00000274026	0	0	0	0	0.984	0.979	0.6	0.926	0.999
CDC20	BUB1B	9606.ENSP00000361540	9606.ENSP00000287598	0	0	0	0	0.953	0.999	0.8	0.993	0.999
CDC20	CCNB2	9606.ENSP00000361540	9606.ENSP00000288207	0	0	0	0	0.988	0.672	0.6	0.894	0.999
CDC20	MELK	9606.ENSP00000361540	9606.ENSP00000298048	0	0	0	0	0.963	0.065	0	0.466	0.98
CDC20	KIAA0101	9606.ENSP00000361540	9606.ENSP00000300035	0	0	0	0	0.939	0	0	0.332	0.958
CDC20	TPX2	9606.ENSP00000361540	9606.ENSP00000300403	0	0	0	0	0.92	0.368	0	0.517	0.973
CDC20	BIRC5	9606.ENSP00000361540	9606.ENSP00000301633	0	0	0	0	0.963	0.058	0	0.667	0.987
CDC20	BUB1	9606.ENSP00000361540	9606.ENSP00000302530	0	0	0	0	0.967	0.964	0	0.984	0.999
CDC20	AURKB	9606.ENSP00000361540	9606.ENSP00000313950	0	0	0	0	0.972	0.335	0.6	0.862	0.998
CDC20	TYMS	9606.ENSP00000361540	9606.ENSP00000315644	0	0	0	0	0.879	0	0	0.436	0.929
CDC20	KIF15	9606.ENSP00000361540	9606.ENSP00000324020	0	0	0	0	0.891	0.102	0	0.333	0.929
CDC20	TACC3	9606.ENSP00000361540	9606.ENSP00000326550	0	0	0	0	0.964	0	0	0.336	0.975
CDC20	CDKN3	9606.ENSP00000361540	9606.ENSP00000335357	0	0	0	0	0.825	0.216	0	0.399	0.91
CDC20	FOXM1	9606.ENSP00000361540	9606.ENSP00000342307	0	0	0	0	0.961	0.058	0	0.526	0.981
CDC20	UBE2C	9606.ENSP00000361540	9606.ENSP00000348838	0	0	0	0	0.982	0.937	0.3	0.913	0.999
CDC20	RRM2	9606.ENSP00000361540	9606.ENSP00000353770	0	0	0	0	0.925	0.058	0	0.588	0.968
CDC20	CENPF	9606.ENSP00000361540	9606.ENSP00000355922	0	0	0	0	0.834	0	0	0.66	0.941
CDC20	NEK2	9606.ENSP00000361540	9606.ENSP00000355966	0	0	0	0	0.947	0.675	0.6	0.878	0.999
CDC20	MKI67	9606.ENSP00000361540	9606.ENSP00000357643	0	0	0	0	0.94	0	0	0.559	0.972
CDC20	KIF2C	9606.ENSP00000361540	9606.ENSP00000361298	0	0	0	0	0.957	0.102	0	0.623	0.984
CDC20	KIF18B	9606.ENSP00000361540	9606.ENSP00000465992	0	0	0	0	0.894	0.102	0	0.174	0.915
CDC20	HJURP	9606.ENSP00000361540	9606.ENSP00000414109	0	0	0	0	0.891	0	0	0.369	0.928
CDC20	GTSE1	9606.ENSP00000361540	9606.ENSP00000415430	0	0	0	0	0.88	0	0	0.448	0.931
CDC20	CDC45	9606.ENSP00000361540	9606.ENSP00000405726	0	0	0	0	0.86	0.056	0	0.613	0.944
CDC20	ECT2	9606.ENSP00000361540	9606.ENSP00000376457	0	0	0	0	0.93	0	0	0.358	0.953
CDC20	KIFC1	9606.ENSP00000361540	9606.ENSP00000393963	0	0	0	0	0.918	0.102	0	0.476	0.958
CDC20	KIF4A	9606.ENSP00000361540	9606.ENSP00000363524	0	0	0	0	0.944	0.102	0	0.462	0.97
CDC20	PBK	9606.ENSP00000361540	9606.ENSP00000428489	0	0	0	0	0.962	0.071	0	0.425	0.978
CDC20	KIF20A	9606.ENSP00000361540	9606.ENSP00000378356	0	0	0	0	0.955	0.102	0	0.576	0.981
CDC20	PRC1	9606.ENSP00000361540	9606.ENSP00000377793	0	0	0	0	0.966	0	0	0.589	0.985
CDC20	TOP2A	9606.ENSP00000361540	9606.ENSP00000411532	0	0	0	0	0.965	0	0	0.663	0.987
CDC20	NUSAP1	9606.ENSP00000361540	9606.ENSP00000453403	0	0	0	0	0.981	0	0	0.557	0.991
CDC20	CDCA8	9606.ENSP00000361540	9606.ENSP00000362146	0	0	0	0	0.989	0	0	0.66	0.996
CDC20	PTTG1	9606.ENSP00000361540	9606.ENSP00000377536	0	0	0	0	0.931	0.914	0.6	0.957	0.999
CDC20	CDK1	9606.ENSP00000361540	9606.ENSP00000378699	0	0	0	0	0.982	0.826	0.6	0.919	0.999
CDC45	AURKA	9606.ENSP00000405726	9606.ENSP00000216911	0	0	0	0	0.894	0	0	0.344	0.927
CDC45	NCAPG	9606.ENSP00000405726	9606.ENSP00000251496	0	0	0	0	0.954	0	0	0.334	0.968
CDC45	CCNB1	9606.ENSP00000405726	9606.ENSP00000256442	0	0	0	0	0.803	0.102	0	0.519	0.908
CDC45	KIF11	9606.ENSP00000405726	9606.ENSP00000260731	0	0	0	0	0.943	0	0	0.235	0.954
CDC45	ASF1B	9606.ENSP00000405726	9606.ENSP00000263382	0	0	0	0	0.822	0.056	0	0.651	0.936
CDC45	CDK2	9606.ENSP00000405726	9606.ENSP00000266970	0	0	0	0	0.384	0.27	0.6	0.905	0.98
CDC45	NUF2	9606.ENSP00000405726	9606.ENSP00000271452	0	0	0	0	0.877	0	0	0.269	0.906
CDC45	CCNA2	9606.ENSP00000405726	9606.ENSP00000274026	0	0	0	0	0.818	0.078	0	0.603	0.927
CDC45	BUB1B	9606.ENSP00000405726	9606.ENSP00000287598	0	0	0	0	0.851	0.056	0	0.498	0.923
CDC45	CCNB2	9606.ENSP00000405726	9606.ENSP00000288207	0	0	0	0	0.865	0.102	0	0.601	0.947
CDC45	MELK	9606.ENSP00000405726	9606.ENSP00000298048	0	0	0	0	0.885	0	0	0.324	0.919
CDC45	TPX2	9606.ENSP00000405726	9606.ENSP00000300403	0	0	0	0	0.878	0	0	0.3	0.911
CDC45	BUB1	9606.ENSP00000405726	9606.ENSP00000302530	0	0	0	0	0.916	0.056	0	0.563	0.962
CDC45	AURKB	9606.ENSP00000405726	9606.ENSP00000313950	0	0	0	0	0.895	0	0	0.436	0.938
CDC45	TYMS	9606.ENSP00000405726	9606.ENSP00000315644	0	0	0	0	0.927	0.056	0	0.29	0.947
CDC45	RRM2	9606.ENSP00000405726	9606.ENSP00000353770	0	0	0	0	0.898	0	0	0.355	0.932
CDC45	DTL	9606.ENSP00000405726	9606.ENSP00000355958	0	0	0	0	0.891	0	0	0.287	0.919
CDC45	CDC20	9606.ENSP00000405726	9606.ENSP00000361540	0	0	0	0	0.86	0.056	0	0.613	0.944
CDC45	CDCA8	9606.ENSP00000405726	9606.ENSP00000362146	0	0	0	0	0.842	0	0	0.494	0.916
CDC45	PRC1	9606.ENSP00000405726	9606.ENSP00000377793	0	0	0	0	0.958	0	0	0.049	0.958
CDC45	CDK1	9606.ENSP00000405726	9606.ENSP00000378699	0	0	0	0	0.893	0	0	0.727	0.969
CDC45	TOP2A	9606.ENSP00000405726	9606.ENSP00000411532	0	0	0	0	0.829	0	0	0.548	0.919
CDCA8	AURKA	9606.ENSP00000362146	9606.ENSP00000216911	0	0	0	0	0.933	0	0.54	0.61	0.987
CDCA8	OIP5	9606.ENSP00000362146	9606.ENSP00000220514	0	0	0	0	0.901	0	0	0.294	0.927
CDCA8	NCAPH	9606.ENSP00000362146	9606.ENSP00000240423	0	0	0	0	0.852	0	0	0.403	0.908
CDCA8	NCAPG	9606.ENSP00000362146	9606.ENSP00000251496	0	0	0	0	0.931	0	0	0.501	0.964
CDCA8	CCNB1	9606.ENSP00000362146	9606.ENSP00000256442	0	0	0	0	0.968	0	0	0.553	0.985
CDCA8	TROAP	9606.ENSP00000362146	9606.ENSP00000257909	0	0	0	0	0.918	0	0	0.113	0.924
CDCA8	KIF11	9606.ENSP00000362146	9606.ENSP00000260731	0	0	0	0	0.963	0	0	0.569	0.983
CDCA8	NDC80	9606.ENSP00000362146	9606.ENSP00000261597	0	0	0	0	0.958	0	0	0.567	0.981
CDCA8	ASF1B	9606.ENSP00000362146	9606.ENSP00000263382	0	0	0	0	0.918	0	0	0.32	0.942
CDCA8	NUF2	9606.ENSP00000362146	9606.ENSP00000271452	0	0	0	0	0.871	0	0	0.558	0.941
CDCA8	CCNA2	9606.ENSP00000362146	9606.ENSP00000274026	0	0	0	0	0.973	0	0	0.477	0.985
CDCA8	BUB1B	9606.ENSP00000362146	9606.ENSP00000287598	0	0	0	0	0.926	0	0	0.664	0.974
CDCA8	CCNB2	9606.ENSP00000362146	9606.ENSP00000288207	0	0	0	0	0.936	0	0	0.591	0.972
CDCA8	MELK	9606.ENSP00000362146	9606.ENSP00000298048	0	0	0	0	0.911	0	0	0.459	0.95
CDCA8	KIAA0101	9606.ENSP00000362146	9606.ENSP00000300035	0	0	0	0	0.918	0	0	0.225	0.934
CDCA8	TPX2	9606.ENSP00000362146	9606.ENSP00000300403	0	0	0	0	0.926	0	0	0.56	0.966
CDCA8	BIRC5	9606.ENSP00000362146	9606.ENSP00000301633	0	0	0	0	0.948	0.908	0.9	0.854	0.999
CDCA8	BUB1	9606.ENSP00000362146	9606.ENSP00000302530	0	0	0	0	0.935	0	0.9	0.797	0.998
CDCA8	SHCBP1	9606.ENSP00000362146	9606.ENSP00000306473	0	0	0	0	0.856	0	0	0.554	0.933
CDCA8	AURKB	9606.ENSP00000362146	9606.ENSP00000313950	0	0	0	0	0.968	0.897	0.9	0.99	0.999
CDCA8	KIF15	9606.ENSP00000362146	9606.ENSP00000324020	0	0	0	0	0.891	0	0	0.369	0.928
CDCA8	TACC3	9606.ENSP00000362146	9606.ENSP00000326550	0	0	0	0	0.912	0	0	0.309	0.936
CDCA8	FOXM1	9606.ENSP00000362146	9606.ENSP00000342307	0	0	0	0	0.907	0	0	0.392	0.941
CDCA8	UBE2C	9606.ENSP00000362146	9606.ENSP00000348838	0	0	0	0	0.961	0	0	0.414	0.976
CDCA8	RRM2	9606.ENSP00000362146	9606.ENSP00000353770	0	0	0	0	0.916	0	0	0.402	0.948
CDCA8	CENPF	9606.ENSP00000362146	9606.ENSP00000355922	0	0	0	0	0.891	0	0	0.574	0.951
CDCA8	NEK2	9606.ENSP00000362146	9606.ENSP00000355966	0	0	0	0	0.915	0	0	0.543	0.959
CDCA8	MKI67	9606.ENSP00000362146	9606.ENSP00000357643	0	0	0	0	0.92	0	0	0.355	0.946
CDCA8	KIF2C	9606.ENSP00000362146	9606.ENSP00000361298	0	0	0	0	0.933	0.128	0.9	0.667	0.997
CDCA8	CDC20	9606.ENSP00000362146	9606.ENSP00000361540	0	0	0	0	0.989	0	0	0.66	0.996
CDCA8	KIF18B	9606.ENSP00000362146	9606.ENSP00000465992	0	0	0	0	0.883	0	0	0.29	0.913
CDCA8	CDC45	9606.ENSP00000362146	9606.ENSP00000405726	0	0	0	0	0.842	0	0	0.494	0.916
CDCA8	PRC1	9606.ENSP00000362146	9606.ENSP00000377793	0	0	0	0	0.881	0.27	0	0.244	0.928
CDCA8	HJURP	9606.ENSP00000362146	9606.ENSP00000414109	0	0	0	0	0.892	0	0	0.401	0.932
CDCA8	ECT2	9606.ENSP00000362146	9606.ENSP00000376457	0	0	0	0	0.868	0.27	0	0.432	0.94
CDCA8	KIF4A	9606.ENSP00000362146	9606.ENSP00000363524	0	0	0	0	0.889	0	0	0.531	0.946
CDCA8	PBK	9606.ENSP00000362146	9606.ENSP00000428489	0	0	0	0	0.915	0	0	0.391	0.946
CDCA8	KIFC1	9606.ENSP00000362146	9606.ENSP00000393963	0	0	0	0	0.904	0	0	0.458	0.946
CDCA8	PTTG1	9606.ENSP00000362146	9606.ENSP00000377536	0	0	0	0	0.904	0	0	0.586	0.958
CDCA8	TOP2A	9606.ENSP00000362146	9606.ENSP00000411532	0	0	0	0	0.931	0	0	0.517	0.965
CDCA8	NUSAP1	9606.ENSP00000362146	9606.ENSP00000453403	0	0	0	0	0.965	0	0	0.537	0.983
CDCA8	CDK1	9606.ENSP00000362146	9606.ENSP00000378699	0	0	0	0	0.971	0	0	0.603	0.988
CDCA8	KIF20A	9606.ENSP00000362146	9606.ENSP00000378356	0	0	0	0	0.919	0.458	0.9	0.632	0.998
CDK1	TRIP13	9606.ENSP00000378699	9606.ENSP00000166345	0	0	0	0	0.959	0.063	0	0.314	0.971
CDK1	AURKA	9606.ENSP00000378699	9606.ENSP00000216911	0	0	0.424	0.755	0.965	0.326	0	0.857	0.982
CDK1	OIP5	9606.ENSP00000378699	9606.ENSP00000220514	0	0	0	0	0.861	0	0	0.383	0.911
CDK1	NCAPH	9606.ENSP00000378699	9606.ENSP00000240423	0	0	0	0	0.746	0.27	0.9	0.425	0.987
CDK1	NCAPG	9606.ENSP00000378699	9606.ENSP00000251496	0	0	0	0	0.992	0.281	0.9	0.538	0.999
CDK1	CCNB1	9606.ENSP00000378699	9606.ENSP00000256442	0	0	0	0	0.968	0.999	0.9	0.995	0.999
CDK1	KIF11	9606.ENSP00000378699	9606.ENSP00000260731	0	0	0	0	0.987	0.559	0	0.835	0.998
CDK1	LMNB1	9606.ENSP00000378699	9606.ENSP00000261366	0	0	0	0	0.618	0.463	0.9	0.572	0.99
CDK1	NDC80	9606.ENSP00000378699	9606.ENSP00000261597	0	0	0	0	0.982	0	0	0.579	0.992
CDK1	CDK6	9606.ENSP00000378699	9606.ENSP00000265734	0	0	0.425	0.923	0.155	0.119	0.9	0.879	0.926
CDK1	CDK2	9606.ENSP00000378699	9606.ENSP00000266970	0	0	0.441	0.968	0.68	0.617	0.9	0.978	0.987
CDK1	NUF2	9606.ENSP00000378699	9606.ENSP00000271452	0	0	0	0	0.965	0	0	0.434	0.979
CDK1	CCNA2	9606.ENSP00000378699	9606.ENSP00000274026	0	0.007	0	0	0.985	0.929	0.9	0.992	0.999
CDK1	BUB1B	9606.ENSP00000378699	9606.ENSP00000287598	0	0	0	0	0.936	0.213	0.9	0.886	0.999
CDK1	CCNB2	9606.ENSP00000378699	9606.ENSP00000288207	0	0	0	0	0.993	0.971	0.9	0.993	0.999
CDK1	MELK	9606.ENSP00000378699	9606.ENSP00000298048	0	0	0	0.711	0.982	0.078	0	0.5	0.985
CDK1	KIAA0101	9606.ENSP00000378699	9606.ENSP00000300035	0	0	0	0	0.942	0	0	0.283	0.956
CDK1	TPX2	9606.ENSP00000378699	9606.ENSP00000300403	0	0	0	0	0.927	0	0	0.572	0.967
CDK1	BIRC5	9606.ENSP00000378699	9606.ENSP00000301633	0	0	0	0	0.963	0.462	0	0.6	0.991
CDK1	BUB1	9606.ENSP00000378699	9606.ENSP00000302530	0	0	0	0	0.99	0.4	0.9	0.918	0.999
CDK1	AURKB	9606.ENSP00000378699	9606.ENSP00000313950	0	0	0.422	0.726	0.959	0.326	0	0.882	0.98
CDK1	TYMS	9606.ENSP00000378699	9606.ENSP00000315644	0	0	0	0	0.977	0	0	0.376	0.985
CDK1	KIF15	9606.ENSP00000378699	9606.ENSP00000324020	0	0	0	0	0.849	0.152	0	0.481	0.928
CDK1	TACC3	9606.ENSP00000378699	9606.ENSP00000326550	0	0	0	0	0.956	0	0	0.351	0.97
CDK1	CDKN3	9606.ENSP00000378699	9606.ENSP00000335357	0	0	0	0	0.913	0.774	0	0.689	0.993
CDK1	FOXM1	9606.ENSP00000378699	9606.ENSP00000342307	0	0	0	0	0.835	0.543	0.9	0.643	0.996
CDK1	UBE2C	9606.ENSP00000378699	9606.ENSP00000348838	0	0	0	0	0.978	0.101	0.6	0.626	0.996
CDK1	SMC4	9606.ENSP00000378699	9606.ENSP00000349961	0	0	0	0	0.906	0.321	0.9	0.52	0.996
CDK1	RRM2	9606.ENSP00000378699	9606.ENSP00000353770	0	0	0	0	0.972	0.463	0	0.546	0.992
CDK1	ARHGAP11A	9606.ENSP00000378699	9606.ENSP00000355090	0	0	0	0	0.91	0.069	0	0.089	0.917
CDK1	CENPF	9606.ENSP00000378699	9606.ENSP00000355922	0	0	0	0	0.858	0	0	0.575	0.937
CDK1	DTL	9606.ENSP00000378699	9606.ENSP00000355958	0	0	0	0	0.854	0.27	0	0.516	0.944
CDK1	NEK2	9606.ENSP00000378699	9606.ENSP00000355966	0	0	0.345	0.74	0.922	0	0	0.625	0.94
CDK1	MKI67	9606.ENSP00000378699	9606.ENSP00000357643	0	0	0	0	0.843	0.27	0	0.672	0.959
CDK1	GADD45A	9606.ENSP00000378699	9606.ENSP00000360025	0	0	0	0	0	0.874	0.9	0.934	0.999
CDK1	KIF2C	9606.ENSP00000378699	9606.ENSP00000361298	0	0	0	0	0.902	0.152	0	0.604	0.964
CDK1	CDC20	9606.ENSP00000378699	9606.ENSP00000361540	0	0	0	0	0.982	0.826	0.6	0.919	0.999
CDK1	CDCA8	9606.ENSP00000378699	9606.ENSP00000362146	0	0	0	0	0.971	0	0	0.603	0.988
CDK1	KIF4A	9606.ENSP00000378699	9606.ENSP00000363524	0	0	0	0	0.942	0.152	0	0.668	0.982
CDK1	ECT2	9606.ENSP00000378699	9606.ENSP00000376457	0	0	0	0	0.957	0.241	0	0.616	0.986
CDK1	PTTG1	9606.ENSP00000378699	9606.ENSP00000377536	0	0	0	0	0.941	0.213	0	0.736	0.986
CDK1	PRC1	9606.ENSP00000378699	9606.ENSP00000377793	0	0	0	0	0.966	0.425	0	0.483	0.989
CDK1	KIF20A	9606.ENSP00000378699	9606.ENSP00000378356	0	0	0	0	0.964	0.152	0	0.583	0.986
CDK1	KIFC1	9606.ENSP00000378699	9606.ENSP00000393963	0	0	0	0	0.805	0.152	0	0.484	0.907
CDK1	HJURP	9606.ENSP00000378699	9606.ENSP00000414109	0	0	0	0	0.834	0	0	0.524	0.917
CDK1	CDC45	9606.ENSP00000378699	9606.ENSP00000405726	0	0	0	0	0.893	0	0	0.727	0.969
CDK1	GTSE1	9606.ENSP00000378699	9606.ENSP00000415430	0	0	0	0	0.698	0	0.9	0.37	0.979
CDK1	NUSAP1	9606.ENSP00000378699	9606.ENSP00000453403	0	0	0	0	0.992	0	0	0.462	0.995
CDK1	TOP2A	9606.ENSP00000378699	9606.ENSP00000411532	0	0	0	0	0.988	0.225	0	0.672	0.996
CDK1	PBK	9606.ENSP00000378699	9606.ENSP00000428489	0	0	0	0	0.989	0.474	0	0.784	0.998
CDK1	WEE1	9606.ENSP00000378699	9606.ENSP00000402084	0	0	0	0	0.19	0.782	0.9	0.942	0.998
CDK2	MYBL2	9606.ENSP00000266970	9606.ENSP00000217026	0	0	0	0	0.36	0.762	0.8	0.533	0.983
CDK2	CCNB1	9606.ENSP00000266970	9606.ENSP00000256442	0	0	0	0	0.421	0.982	0.9	0.991	0.999
CDK2	CDK6	9606.ENSP00000266970	9606.ENSP00000265734	0	0	0.439	0.927	0.108	0.69	0.9	0.982	0.973
CDK2	WEE1	9606.ENSP00000266970	9606.ENSP00000402084	0	0	0	0.584	0.113	0.465	0.8	0.9	0.935
CDK2	CDC45	9606.ENSP00000266970	9606.ENSP00000405726	0	0	0	0	0.384	0.27	0.6	0.905	0.98
CDK2	CDK1	9606.ENSP00000266970	9606.ENSP00000378699	0	0	0.441	0.968	0.68	0.617	0.9	0.978	0.987
CDK2	CDC20	9606.ENSP00000266970	9606.ENSP00000361540	0	0	0	0	0.436	0.918	0	0.745	0.987
CDK2	FOXM1	9606.ENSP00000266970	9606.ENSP00000342307	0	0	0	0	0.282	0.544	0.9	0.725	0.989
CDK2	CCNB2	9606.ENSP00000266970	9606.ENSP00000288207	0	0	0	0	0.448	0.917	0.9	0.746	0.998
CDK2	CDKN3	9606.ENSP00000266970	9606.ENSP00000335357	0	0	0	0	0.181	0.977	0	0.988	0.999
CDK2	CCNA2	9606.ENSP00000266970	9606.ENSP00000274026	0	0.006	0	0	0.401	0.999	0.9	0.995	0.999
CDK6	CCNB1	9606.ENSP00000265734	9606.ENSP00000256442	0	0	0	0	0.151	0.23	0.9	0.809	0.985
CDK6	CDKN2C	9606.ENSP00000265734	9606.ENSP00000262662	0	0	0	0	0	0.982	0.8	0.979	0.999
CDK6	CDK1	9606.ENSP00000265734	9606.ENSP00000378699	0	0	0.425	0.923	0.155	0.119	0.9	0.879	0.926
CDK6	CDK2	9606.ENSP00000265734	9606.ENSP00000266970	0	0	0.439	0.927	0.108	0.69	0.9	0.982	0.973
CDK6	CCNB2	9606.ENSP00000265734	9606.ENSP00000288207	0	0	0	0	0.153	0.23	0.9	0.671	0.975
CDK6	CCNA2	9606.ENSP00000265734	9606.ENSP00000274026	0	0.003	0	0	0.162	0.413	0.72	0.876	0.98
CDKN2C	CDK6	9606.ENSP00000262662	9606.ENSP00000265734	0	0	0	0	0	0.982	0.8	0.979	0.999
CDKN3	AURKA	9606.ENSP00000335357	9606.ENSP00000216911	0	0	0	0	0.901	0.243	0	0.393	0.95
CDKN3	NCAPG	9606.ENSP00000335357	9606.ENSP00000251496	0	0	0	0	0.904	0.056	0	0.312	0.932
CDKN3	CCNB1	9606.ENSP00000335357	9606.ENSP00000256442	0	0	0	0	0.867	0.153	0	0.598	0.951
CDKN3	CDK2	9606.ENSP00000335357	9606.ENSP00000266970	0	0	0	0	0.181	0.977	0	0.988	0.999
CDKN3	CCNA2	9606.ENSP00000335357	9606.ENSP00000274026	0	0	0	0	0.886	0.085	0	0.79	0.976
CDKN3	CCNB2	9606.ENSP00000335357	9606.ENSP00000288207	0	0	0	0	0.858	0.153	0	0.404	0.922
CDKN3	MELK	9606.ENSP00000335357	9606.ENSP00000298048	0	0	0	0	0.899	0.143	0	0.117	0.917
CDKN3	BUB1	9606.ENSP00000335357	9606.ENSP00000302530	0	0	0	0	0.903	0.056	0	0.292	0.93
CDKN3	AURKB	9606.ENSP00000335357	9606.ENSP00000313950	0	0	0	0	0.804	0.243	0	0.385	0.901
CDKN3	CDC20	9606.ENSP00000335357	9606.ENSP00000361540	0	0	0	0	0.825	0.216	0	0.399	0.91
CDKN3	TOP2A	9606.ENSP00000335357	9606.ENSP00000411532	0	0	0	0	0.875	0	0	0.316	0.911
CDKN3	PTTG1	9606.ENSP00000335357	9606.ENSP00000377536	0	0	0	0	0.907	0	0	0.177	0.92
CDKN3	PBK	9606.ENSP00000335357	9606.ENSP00000428489	0	0	0	0	0.904	0.111	0	0.152	0.922
CDKN3	PRC1	9606.ENSP00000335357	9606.ENSP00000377793	0	0	0	0	0.819	0.309	0	0.489	0.93
CDKN3	CDK1	9606.ENSP00000335357	9606.ENSP00000378699	0	0	0	0	0.913	0.774	0	0.689	0.993
CENPF	AURKA	9606.ENSP00000355922	9606.ENSP00000216911	0	0	0	0	0.846	0	0	0.524	0.923
CENPF	NCAPG	9606.ENSP00000355922	9606.ENSP00000251496	0	0	0	0	0.923	0	0	0.525	0.961
CENPF	CCNB1	9606.ENSP00000355922	9606.ENSP00000256442	0	0	0	0	0.849	0	0.72	0.661	0.984
CENPF	KIF11	9606.ENSP00000355922	9606.ENSP00000260731	0	0	0	0	0.925	0	0	0.563	0.966
CENPF	NDC80	9606.ENSP00000355922	9606.ENSP00000261597	0	0	0	0	0.909	0	0.72	0.71	0.991
CENPF	NUF2	9606.ENSP00000355922	9606.ENSP00000271452	0	0	0	0	0.892	0	0	0.622	0.957
CENPF	CCNA2	9606.ENSP00000355922	9606.ENSP00000274026	0	0	0	0	0.909	0	0	0.499	0.952
CENPF	BUB1B	9606.ENSP00000355922	9606.ENSP00000287598	0	0	0	0	0.896	0	0.9	0.767	0.997
CENPF	CCNB2	9606.ENSP00000355922	9606.ENSP00000288207	0	0	0	0	0.901	0	0	0.588	0.957
CENPF	MELK	9606.ENSP00000355922	9606.ENSP00000298048	0	0	0	0	0.874	0	0	0.508	0.935
CENPF	TPX2	9606.ENSP00000355922	9606.ENSP00000300403	0	0	0	0	0.892	0	0	0.559	0.95
CENPF	BIRC5	9606.ENSP00000355922	9606.ENSP00000301633	0	0	0	0	0.809	0	0	0.602	0.92
CENPF	BUB1	9606.ENSP00000355922	9606.ENSP00000302530	0	0	0	0	0.938	0	0.72	0.918	0.998
CENPF	AURKB	9606.ENSP00000355922	9606.ENSP00000313950	0	0	0	0	0.804	0	0	0.65	0.928
CENPF	SKA3	9606.ENSP00000355922	9606.ENSP00000319417	0	0	0	0	0.587	0	0.9	0.511	0.978
CENPF	KIF15	9606.ENSP00000355922	9606.ENSP00000324020	0	0	0	0	0.902	0	0	0.462	0.945
CENPF	FOXM1	9606.ENSP00000355922	9606.ENSP00000342307	0	0	0	0	0.819	0	0.9	0.611	0.992
CENPF	UBE2C	9606.ENSP00000355922	9606.ENSP00000348838	0	0	0	0	0.849	0	0	0.556	0.93
CENPF	RRM2	9606.ENSP00000355922	9606.ENSP00000353770	0	0	0	0	0.915	0	0	0.465	0.952
CENPF	PRC1	9606.ENSP00000355922	9606.ENSP00000377793	0	0	0	0	0.817	0.27	0	0.347	0.905
CENPF	KIF4A	9606.ENSP00000355922	9606.ENSP00000363524	0	0	0	0	0.842	0	0	0.5	0.917
CENPF	HJURP	9606.ENSP00000355922	9606.ENSP00000414109	0	0	0	0	0.894	0	0	0.376	0.931
CENPF	CDK1	9606.ENSP00000355922	9606.ENSP00000378699	0	0	0	0	0.858	0	0	0.575	0.937
CENPF	PTTG1	9606.ENSP00000355922	9606.ENSP00000377536	0	0	0	0	0.856	0	0	0.608	0.941
CENPF	CDC20	9606.ENSP00000355922	9606.ENSP00000361540	0	0	0	0	0.834	0	0	0.66	0.941
CENPF	CDCA8	9606.ENSP00000355922	9606.ENSP00000362146	0	0	0	0	0.891	0	0	0.574	0.951
CENPF	PBK	9606.ENSP00000355922	9606.ENSP00000428489	0	0	0	0	0.916	0	0	0.459	0.952
CENPF	KIF2C	9606.ENSP00000355922	9606.ENSP00000361298	0	0	0	0	0.885	0	0	0.633	0.956
CENPF	NEK2	9606.ENSP00000355922	9606.ENSP00000355966	0	0	0	0	0.893	0	0	0.656	0.961
CENPF	KIF20A	9606.ENSP00000355922	9606.ENSP00000378356	0	0	0	0	0.926	0	0	0.522	0.963
CENPF	MKI67	9606.ENSP00000355922	9606.ENSP00000357643	0	0	0	0	0.936	0.27	0	0.519	0.975
CENPF	NUSAP1	9606.ENSP00000355922	9606.ENSP00000453403	0	0	0	0	0.95	0	0	0.561	0.977
CENPF	TOP2A	9606.ENSP00000355922	9606.ENSP00000411532	0	0	0	0	0.963	0	0	0.641	0.986
CENPU	OIP5	9606.ENSP00000281453	9606.ENSP00000220514	0	0	0	0	0.783	0	0.6	0.335	0.937
CENPU	NDC80	9606.ENSP00000281453	9606.ENSP00000261597	0	0	0	0	0.788	0	0	0.938	0.986
CENPU	HJURP	9606.ENSP00000281453	9606.ENSP00000414109	0	0	0	0	0.615	0	0.6	0.493	0.915
CFH	C3	9606.ENSP00000356399	9606.ENSP00000245907	0	0	0	0	0.118	0.982	0.8	0.989	0.999
CFH	PTX3	9606.ENSP00000356399	9606.ENSP00000295927	0	0	0	0	0.065	0.877	0	0.963	0.995
CFH	CFI	9606.ENSP00000356399	9606.ENSP00000378130	0	0	0	0	0.12	0.87	0.6	0.93	0.996
CFI	C3	9606.ENSP00000378130	9606.ENSP00000245907	0	0	0	0	0.139	0.974	0.8	0.971	0.999
CFI	C2	9606.ENSP00000378130	9606.ENSP00000299367	0	0	0	0	0.099	0	0.65	0.737	0.91
CFI	CFH	9606.ENSP00000378130	9606.ENSP00000356399	0	0	0	0	0.12	0.87	0.6	0.93	0.996
CHAF1B	ASF1B	9606.ENSP00000315700	9606.ENSP00000263382	0	0	0	0	0.571	0.971	0	0.771	0.997
CHI3L1	IL13RA2	9606.ENSP00000255409	9606.ENSP00000361004	0	0	0	0	0	0.746	0	0.8	0.947
CHI3L1	SDC1	9606.ENSP00000255409	9606.ENSP00000370542	0	0	0	0	0	0	0	0.961	0.961
CIITA	STAT1	9606.ENSP00000485010	9606.ENSP00000354394	0	0	0	0	0.062	0	0.8	0.573	0.913
CLCF1	CRLF1	9606.ENSP00000309338	9606.ENSP00000376188	0	0	0	0	0.066	0.682	0.8	0.985	0.999
CMPK2	RRM2	9606.ENSP00000256722	9606.ENSP00000353770	0	0	0	0	0.158	0.056	0.9	0.153	0.923
CMPK2	RSAD2	9606.ENSP00000256722	9606.ENSP00000371471	0	0	0	0	0.908	0	0	0.728	0.974
COL14A1	MMP9	9606.ENSP00000297848	9606.ENSP00000361405	0	0	0	0	0.062	0.203	0.9	0.229	0.934
COL1A1	PCOLCE	9606.ENSP00000225964	9606.ENSP00000223061	0	0	0	0	0.544	0.173	0.9	0.415	0.975
COL1A1	SDC1	9606.ENSP00000225964	9606.ENSP00000370542	0	0	0	0	0.141	0	0.9	0.181	0.923
COL1A1	SERPINH1	9606.ENSP00000225964	9606.ENSP00000434412	0	0	0	0	0.4	0.183	0.6	0.665	0.925
COL1A1	COL6A2	9606.ENSP00000225964	9606.ENSP00000300527	0	0	0	0.602	0.882	0.178	0.3	0.742	0.948
COL1A1	FN1	9606.ENSP00000225964	9606.ENSP00000346839	0	0	0	0	0.356	0.701	0	0.757	0.949
COL1A1	COL5A1	9606.ENSP00000225964	9606.ENSP00000360882	0	0	0.42	0.85	0.779	0.192	0.72	0.82	0.955
COL1A1	ITGA2	9606.ENSP00000225964	9606.ENSP00000296585	0	0	0	0	0.069	0.463	0.9	0.402	0.966
COL1A1	LUM	9606.ENSP00000225964	9606.ENSP00000266718	0	0	0	0	0.764	0.379	0.72	0.58	0.98
COL1A1	COL5A2	9606.ENSP00000225964	9606.ENSP00000364000	0	0	0.444	0.949	0.94	0	0.72	0.796	0.983
COL1A1	COL3A1	9606.ENSP00000225964	9606.ENSP00000304408	0	0	0.439	0.951	0.944	0	0.8	0.892	0.989
COL1A1	COL1A2	9606.ENSP00000225964	9606.ENSP00000297268	0	0	0.443	0.958	0.99	0.559	0.9	0.954	0.999
COL1A2	PCOLCE	9606.ENSP00000297268	9606.ENSP00000223061	0	0	0	0	0.557	0.151	0.9	0.626	0.984
COL1A2	COL1A1	9606.ENSP00000297268	9606.ENSP00000225964	0	0	0.443	0.958	0.99	0.559	0.9	0.954	0.999
COL1A2	F13A1	9606.ENSP00000297268	9606.ENSP00000264870	0	0	0	0	0	0	0.9	0.143	0.91
COL1A2	LUM	9606.ENSP00000297268	9606.ENSP00000266718	0	0	0	0	0.875	0.472	0.9	0.559	0.996
COL1A2	ITGA2	9606.ENSP00000297268	9606.ENSP00000296585	0	0	0	0	0.062	0.463	0.9	0.36	0.963
COL1A2	SDC1	9606.ENSP00000297268	9606.ENSP00000370542	0	0	0	0	0.079	0	0.9	0.17	0.916
COL1A2	ANXA1	9606.ENSP00000297268	9606.ENSP00000366109	0	0	0	0	0.16	0	0.9	0.17	0.924
COL1A2	POSTN	9606.ENSP00000297268	9606.ENSP00000369071	0	0	0	0	0.738	0.392	0	0.585	0.928
COL1A2	COL5A1	9606.ENSP00000297268	9606.ENSP00000360882	0	0	0.426	0.84	0.723	0.466	0.72	0.785	0.963
COL1A2	FN1	9606.ENSP00000297268	9606.ENSP00000346839	0	0	0	0	0.518	0.225	0.9	0.689	0.986
COL1A2	COL3A1	9606.ENSP00000297268	9606.ENSP00000304408	0	0	0.44	0.93	0.948	0.213	0.8	0.873	0.991
COL1A2	COL5A2	9606.ENSP00000297268	9606.ENSP00000364000	0	0	0.446	0.936	0.964	0.4	0.72	0.81	0.993
COL3A1	PCOLCE	9606.ENSP00000304408	9606.ENSP00000223061	0	0	0	0	0.487	0.857	0.9	0.418	0.995
COL3A1	COL1A1	9606.ENSP00000304408	9606.ENSP00000225964	0	0	0.439	0.951	0.944	0	0.8	0.892	0.989
COL3A1	LUM	9606.ENSP00000304408	9606.ENSP00000266718	0	0	0	0	0.831	0.189	0.72	0.607	0.982
COL3A1	ITGA2	9606.ENSP00000304408	9606.ENSP00000296585	0	0	0	0	0.062	0.297	0.9	0.341	0.95
COL3A1	COL1A2	9606.ENSP00000304408	9606.ENSP00000297268	0	0	0.44	0.93	0.948	0.213	0.8	0.873	0.991
COL3A1	COL5A1	9606.ENSP00000304408	9606.ENSP00000360882	0	0	0.401	0.841	0.643	0	0.72	0.818	0.914
COL3A1	SDC1	9606.ENSP00000304408	9606.ENSP00000370542	0	0	0	0	0.093	0	0.9	0.156	0.916
COL3A1	POSTN	9606.ENSP00000304408	9606.ENSP00000369071	0	0	0	0	0.798	0.103	0	0.609	0.923
COL3A1	COL5A2	9606.ENSP00000304408	9606.ENSP00000364000	0	0	0.444	0.931	0.939	0	0.72	0.822	0.983
COL4A1	IBSP	9606.ENSP00000364979	9606.ENSP00000226284	0	0	0	0	0	0	0.9	0.102	0.906
COL4A1	ITGA2	9606.ENSP00000364979	9606.ENSP00000296585	0	0	0	0	0.07	0	0.9	0.477	0.947
COL4A1	COL4A2	9606.ENSP00000364979	9606.ENSP00000353654	0	0	0.433	0.886	0.963	0.934	0.9	0.96	0.999
COL4A1	SDC1	9606.ENSP00000364979	9606.ENSP00000370542	0	0	0	0	0.09	0	0.9	0.15	0.915
COL4A2	IBSP	9606.ENSP00000353654	9606.ENSP00000226284	0	0	0	0	0	0	0.9	0.143	0.91
COL4A2	ITGA2	9606.ENSP00000353654	9606.ENSP00000296585	0	0	0	0	0.076	0	0.9	0.277	0.927
COL4A2	SERPINH1	9606.ENSP00000353654	9606.ENSP00000434412	0	0	0	0	0.337	0.547	0.6	0.4	0.918
COL4A2	SDC1	9606.ENSP00000353654	9606.ENSP00000370542	0	0	0	0	0.126	0	0.9	0.15	0.919
COL4A2	COL4A1	9606.ENSP00000353654	9606.ENSP00000364979	0	0	0.433	0.886	0.963	0.934	0.9	0.96	0.999
COL5A1	PCOLCE	9606.ENSP00000360882	9606.ENSP00000223061	0	0	0	0	0.374	0.497	0.9	0.48	0.981
COL5A1	COL1A1	9606.ENSP00000360882	9606.ENSP00000225964	0	0	0.42	0.85	0.779	0.192	0.72	0.82	0.955
COL5A1	LUM	9606.ENSP00000360882	9606.ENSP00000266718	0	0	0	0	0.381	0.189	0.72	0.522	0.923
COL5A1	COL1A2	9606.ENSP00000360882	9606.ENSP00000297268	0	0	0.426	0.84	0.723	0.466	0.72	0.785	0.963
COL5A1	COL6A2	9606.ENSP00000360882	9606.ENSP00000300527	0	0	0	0.624	0.832	0.367	0.3	0.701	0.94
COL5A1	COL3A1	9606.ENSP00000360882	9606.ENSP00000304408	0	0	0.401	0.841	0.643	0	0.72	0.818	0.914
COL5A1	SDC1	9606.ENSP00000360882	9606.ENSP00000370542	0	0	0	0	0.098	0	0.9	0.15	0.916
COL5A1	COL5A2	9606.ENSP00000360882	9606.ENSP00000364000	0	0	0.421	0.838	0.663	0.305	0.9	0.868	0.979
COL5A2	PCOLCE	9606.ENSP00000364000	9606.ENSP00000223061	0	0	0	0	0.242	0.173	0.9	0.425	0.959
COL5A2	COL1A1	9606.ENSP00000364000	9606.ENSP00000225964	0	0	0.444	0.949	0.94	0	0.72	0.796	0.983
COL5A2	LUM	9606.ENSP00000364000	9606.ENSP00000266718	0	0	0	0	0.61	0.189	0.72	0.42	0.941
COL5A2	COL1A2	9606.ENSP00000364000	9606.ENSP00000297268	0	0	0.446	0.936	0.964	0.4	0.72	0.81	0.993
COL5A2	COL3A1	9606.ENSP00000364000	9606.ENSP00000304408	0	0	0.444	0.931	0.939	0	0.72	0.822	0.983
COL5A2	COL5A1	9606.ENSP00000364000	9606.ENSP00000360882	0	0	0.421	0.838	0.663	0.305	0.9	0.868	0.979
COL5A2	SDC1	9606.ENSP00000364000	9606.ENSP00000370542	0	0	0	0	0.076	0	0.9	0.082	0.907
COL6A2	COL1A1	9606.ENSP00000300527	9606.ENSP00000225964	0	0	0	0.602	0.882	0.178	0.3	0.742	0.948
COL6A2	ITGA2	9606.ENSP00000300527	9606.ENSP00000296585	0	0	0	0	0.062	0	0.9	0.346	0.933
COL6A2	SDC1	9606.ENSP00000300527	9606.ENSP00000370542	0	0	0	0	0.076	0	0.9	0.122	0.911
COL6A2	COL5A1	9606.ENSP00000300527	9606.ENSP00000360882	0	0	0	0.624	0.832	0.367	0.3	0.701	0.94
CRLF1	CLCF1	9606.ENSP00000376188	9606.ENSP00000309338	0	0	0	0	0.066	0.682	0.8	0.985	0.999
CTHRC1	FZD6	9606.ENSP00000330523	9606.ENSP00000351605	0	0	0	0	0.109	0	0.9	0.589	0.96
CTSC	CD74	9606.ENSP00000227266	9606.ENSP00000009530	0	0	0	0	0.076	0	0.9	0.251	0.924
CTSC	HLA-DQA2	9606.ENSP00000227266	9606.ENSP00000364076	0	0	0	0	0.063	0	0.9	0.056	0.903
CTSC	HLA-DQB2	9606.ENSP00000227266	9606.ENSP00000390431	0	0	0	0	0.082	0	0.9	0.063	0.906
CTSC	HLA-DPB1	9606.ENSP00000227266	9606.ENSP00000408146	0	0	0	0	0.062	0	0.9	0.09	0.907
CTSC	HLA-DQA1	9606.ENSP00000227266	9606.ENSP00000339398	0	0	0	0	0.063	0	0.9	0.102	0.908
CTSC	HLA-DPA1	9606.ENSP00000227266	9606.ENSP00000393566	0	0	0	0	0.063	0	0.9	0.108	0.909
CTSC	HLA-DRB1	9606.ENSP00000227266	9606.ENSP00000353099	0	0	0	0	0.063	0	0.9	0.117	0.91
CTSC	HLA-DQB1	9606.ENSP00000227266	9606.ENSP00000364080	0	0	0	0	0.075	0	0.9	0.15	0.914
CTSC	HLA-DRB5	9606.ENSP00000227266	9606.ENSP00000364114	0	0	0	0	0.063	0	0.9	0.216	0.92
CTSC	HLA-DRA	9606.ENSP00000227266	9606.ENSP00000378786	0	0	0	0	0.066	0	0.9	0.26	0.924
CXCL1	CCL2	9606.ENSP00000379110	9606.ENSP00000225831	0	0	0	0	0.211	0	0.9	0.883	0.989
CXCL1	LIF	9606.ENSP00000379110	9606.ENSP00000249075	0	0	0	0	0.161	0	0.9	0.411	0.946
CXCL1	CXCL10	9606.ENSP00000379110	9606.ENSP00000305651	0	0	0	0	0.151	0	0.6	0.878	0.955
CXCL1	SDC1	9606.ENSP00000379110	9606.ENSP00000370542	0	0	0	0	0	0	0	0.961	0.961
CXCL1	CCL5	9606.ENSP00000379110	9606.ENSP00000474412	0	0	0	0	0.063	0.056	0.6	0.887	0.954
CXCL10	CCL2	9606.ENSP00000305651	9606.ENSP00000225831	0	0	0	0	0.16	0	0.9	0.91	0.991
CXCL10	LIF	9606.ENSP00000305651	9606.ENSP00000249075	0	0	0	0	0.062	0	0.9	0.417	0.94
CXCL10	GBP1	9606.ENSP00000305651	9606.ENSP00000359504	0	0	0	0	0.795	0	0	0.55	0.903
CXCL10	STAT1	9606.ENSP00000305651	9606.ENSP00000354394	0	0	0	0	0.707	0	0	0.745	0.922
CXCL10	CXCL1	9606.ENSP00000305651	9606.ENSP00000379110	0	0	0	0	0.151	0	0.6	0.878	0.955
CXCL10	CXCL8	9606.ENSP00000305651	9606.ENSP00000306512	0	0	0	0	0.145	0	0.6	0.879	0.955
CXCL10	CCL5	9606.ENSP00000305651	9606.ENSP00000474412	0	0	0	0	0.306	0.248	0.6	0.908	0.978
CXCL8	CCL2	9606.ENSP00000306512	9606.ENSP00000225831	0	0	0	0	0.271	0.28	0.9	0.923	0.995
CXCL8	TNFAIP6	9606.ENSP00000306512	9606.ENSP00000243347	0	0	0	0	0.182	0.417	0	0.969	0.984
CXCL8	LIF	9606.ENSP00000306512	9606.ENSP00000249075	0	0	0	0	0.172	0	0.9	0.517	0.956
CXCL8	CXCL10	9606.ENSP00000306512	9606.ENSP00000305651	0	0	0	0	0.145	0	0.6	0.879	0.955
CXCL8	UBE2C	9606.ENSP00000306512	9606.ENSP00000348838	0	0	0	0	0	0	0.9	0.095	0.905
CXCL8	CCL5	9606.ENSP00000306512	9606.ENSP00000474412	0	0	0	0	0.065	0.281	0.6	0.888	0.966
CYP1B1	AHR	9606.ENSP00000478561	9606.ENSP00000242057	0	0	0	0	0.096	0.273	0	0.893	0.924
DES	AURKB	9606.ENSP00000363071	9606.ENSP00000313950	0	0	0	0	0.066	0.487	0.9	0.227	0.958
DES	VIM	9606.ENSP00000363071	9606.ENSP00000446007	0	0	0	0.962	0.062	0.8	0.8	0.06	0.959
DPYD	TYMP	9606.ENSP00000359211	9606.ENSP00000379038	0.073	0	0	0	0.097	0	0.9	0.812	0.982
DTL	NCAPG	9606.ENSP00000355958	9606.ENSP00000251496	0	0	0	0	0.93	0	0	0.142	0.938
DTL	CCNA2	9606.ENSP00000355958	9606.ENSP00000274026	0	0	0	0	0.825	0.27	0	0.486	0.928
DTL	RRM2	9606.ENSP00000355958	9606.ENSP00000353770	0	0	0	0	0.854	0.137	0	0.411	0.919
DTL	CDC45	9606.ENSP00000355958	9606.ENSP00000405726	0	0	0	0	0.891	0	0	0.287	0.919
DTL	CDK1	9606.ENSP00000355958	9606.ENSP00000378699	0	0	0	0	0.854	0.27	0	0.516	0.944
ECT2	AURKA	9606.ENSP00000376457	9606.ENSP00000216911	0	0	0	0	0.886	0.143	0	0.485	0.945
ECT2	NCAPG	9606.ENSP00000376457	9606.ENSP00000251496	0	0	0	0	0.881	0	0	0.302	0.913
ECT2	KIF11	9606.ENSP00000376457	9606.ENSP00000260731	0	0	0	0	0.916	0.059	0	0.358	0.945
ECT2	NDC80	9606.ENSP00000376457	9606.ENSP00000261597	0	0	0	0	0.912	0	0	0.146	0.922
ECT2	CCNA2	9606.ENSP00000376457	9606.ENSP00000274026	0	0	0	0	0.936	0.073	0	0.205	0.949
ECT2	CCNB2	9606.ENSP00000376457	9606.ENSP00000288207	0	0	0	0	0.86	0.099	0	0.362	0.912
ECT2	MELK	9606.ENSP00000376457	9606.ENSP00000298048	0	0	0	0	0.92	0.078	0	0.271	0.942
ECT2	AURKB	9606.ENSP00000376457	9606.ENSP00000313950	0	0	0	0	0.813	0.347	0	0.569	0.942
ECT2	CDC20	9606.ENSP00000376457	9606.ENSP00000361540	0	0	0	0	0.93	0	0	0.358	0.953
ECT2	CDCA8	9606.ENSP00000376457	9606.ENSP00000362146	0	0	0	0	0.868	0.27	0	0.432	0.94
ECT2	KIF4A	9606.ENSP00000376457	9606.ENSP00000363524	0	0	0	0	0.781	0.059	0	0.576	0.905
ECT2	NUSAP1	9606.ENSP00000376457	9606.ENSP00000453403	0	0	0	0	0.884	0	0	0.335	0.92
ECT2	TOP2A	9606.ENSP00000376457	9606.ENSP00000411532	0	0	0	0	0.882	0.27	0	0.368	0.941
ECT2	PRC1	9606.ENSP00000376457	9606.ENSP00000377793	0	0	0	0	0.916	0	0	0.457	0.952
ECT2	KIF20A	9606.ENSP00000376457	9606.ENSP00000378356	0	0	0	0	0.862	0.118	0	0.651	0.953
ECT2	CDK1	9606.ENSP00000376457	9606.ENSP00000378699	0	0	0	0	0.957	0.241	0	0.616	0.986
EGFR	ITGA3	9606.ENSP00000275493	9606.ENSP00000007722	0	0	0	0	0.189	0	0.9	0.486	0.954
EGFR	LAMB1	9606.ENSP00000275493	9606.ENSP00000222399	0	0	0	0	0.255	0	0.9	0.17	0.932
EGFR	CAV2	9606.ENSP00000275493	9606.ENSP00000222693	0	0	0	0	0.138	0.803	0.8	0.325	0.974
EGFR	PLSCR1	9606.ENSP00000275493	9606.ENSP00000345494	0	0	0	0	0	0.462	0	0.83	0.904
EGFR	S100A4	9606.ENSP00000275493	9606.ENSP00000357705	0	0	0	0	0	0.737	0	0.693	0.915
EGFR	VEGFA	9606.ENSP00000275493	9606.ENSP00000478570	0	0	0	0	0.089	0	0.6	0.861	0.944
EGFR	MET	9606.ENSP00000275493	9606.ENSP00000317272	0	0	0	0.58	0.23	0.887	0	0.988	0.946
EGFR	NNMT	9606.ENSP00000275493	9606.ENSP00000441434	0	0	0	0	0.945	0.071	0	0.154	0.952
EGFR	PLAU	9606.ENSP00000275493	9606.ENSP00000361850	0	0	0	0	0.088	0	0.9	0.626	0.962
EGFR	IGFBP3	9606.ENSP00000275493	9606.ENSP00000370473	0	0	0	0	0.278	0.27	0	0.949	0.971
EGFR	STAT1	9606.ENSP00000275493	9606.ENSP00000354394	0	0	0	0	0.062	0.875	0.9	0.709	0.996
EGFR	CD44	9606.ENSP00000275493	9606.ENSP00000398632	0	0	0	0	0.099	0.753	0	0.989	0.997
EGFR	PLAUR	9606.ENSP00000275493	9606.ENSP00000339328	0	0	0	0	0	0	0.9	0.987	0.998
EGFR	CAV1	9606.ENSP00000275493	9606.ENSP00000339191	0	0	0	0	0.335	0.881	0.9	0.988	0.999
EGR1	OAS3	9606.ENSP00000239938	9606.ENSP00000228928	0	0	0	0	0	0	0.9	0.15	0.911
EGR1	GBP2	9606.ENSP00000239938	9606.ENSP00000359497	0	0	0	0	0.062	0	0.9	0.095	0.907
EGR1	RSAD2	9606.ENSP00000239938	9606.ENSP00000371471	0	0	0	0	0	0	0.9	0.124	0.908
EGR1	OAS2	9606.ENSP00000239938	9606.ENSP00000342278	0	0	0	0	0	0	0.9	0.134	0.909
EGR1	IFI6	9606.ENSP00000239938	9606.ENSP00000342513	0	0	0	0	0	0	0.9	0.168	0.913
EGR1	OAS1	9606.ENSP00000239938	9606.ENSP00000388001	0	0	0	0	0	0	0.9	0.17	0.913
EGR1	ISG15	9606.ENSP00000239938	9606.ENSP00000368699	0	0	0	0	0.062	0.077	0.9	0.175	0.919
EGR1	MX1	9606.ENSP00000239938	9606.ENSP00000381601	0	0	0	0	0.063	0.056	0.9	0.233	0.923
EGR1	IRF1	9606.ENSP00000239938	9606.ENSP00000245414	0	0	0	0	0.062	0	0.9	0.469	0.945
EGR1	STAT1	9606.ENSP00000239938	9606.ENSP00000354394	0	0	0	0	0.062	0.062	0.9	0.474	0.947
EGR1	F3	9606.ENSP00000239938	9606.ENSP00000334145	0	0	0	0	0.062	0	0.9	0.517	0.95
EGR1	ARC	9606.ENSP00000239938	9606.ENSP00000349022	0	0	0	0	0.064	0	0.9	0.655	0.964
F13A1	COL1A2	9606.ENSP00000264870	9606.ENSP00000297268	0	0	0	0	0	0	0.9	0.143	0.91
F13A1	ANXA1	9606.ENSP00000264870	9606.ENSP00000366109	0	0	0	0	0.088	0	0.9	0.185	0.919
F3	TFPI	9606.ENSP00000334145	9606.ENSP00000233156	0	0	0	0	0	0	0.6	0.972	0.988
F3	EGR1	9606.ENSP00000334145	9606.ENSP00000239938	0	0	0	0	0.062	0	0.9	0.517	0.95
FAM64A	CDC20	9606.ENSP00000250056	9606.ENSP00000361540	0	0	0	0	0.872	0	0	0.366	0.915
FBLIM1	FLNC	9606.ENSP00000416387	9606.ENSP00000327145	0	0	0	0	0.096	0.803	0.6	0.364	0.948
FBLIM1	FLNA	9606.ENSP00000416387	9606.ENSP00000358866	0	0	0	0	0.062	0.895	0.6	0.963	0.998
FBLN5	LOXL2	9606.ENSP00000345008	9606.ENSP00000373783	0	0	0	0	0.085	0.057	0.9	0.564	0.957
FCGR3A	PTPRC	9606.ENSP00000356946	9606.ENSP00000411355	0	0	0	0	0.291	0.33	0	0.857	0.926
FLNA	CAV1	9606.ENSP00000358866	9606.ENSP00000339191	0	0	0	0	0.088	0.213	0	0.988	0.99
FLNA	TAGLN2	9606.ENSP00000358866	9606.ENSP00000357076	0	0	0	0	0.208	0.167	0.9	0.307	0.948
FLNA	FBLIM1	9606.ENSP00000358866	9606.ENSP00000416387	0	0	0	0	0.062	0.895	0.6	0.963	0.998
FLNC	FBLIM1	9606.ENSP00000327145	9606.ENSP00000416387	0	0	0	0	0.096	0.803	0.6	0.364	0.948
FMOD	OGN	9606.ENSP00000347041	9606.ENSP00000262551	0	0	0	0.631	0.139	0	0.9	0.823	0.937
FMOD	LUM	9606.ENSP00000347041	9606.ENSP00000266718	0	0	0.447	0.928	0.353	0	0.9	0.919	0.938
FMOD	B3GNT7	9606.ENSP00000347041	9606.ENSP00000287590	0	0	0	0	0.053	0.056	0.9	0.118	0.91
FN1	ITGA3	9606.ENSP00000346839	9606.ENSP00000007722	0	0	0	0	0.111	0.462	0.8	0.972	0.997
FN1	COL1A1	9606.ENSP00000346839	9606.ENSP00000225964	0	0	0	0	0.356	0.701	0	0.757	0.949
FN1	THBS1	9606.ENSP00000346839	9606.ENSP00000260356	0	0	0	0	0.17	0.684	0.72	0.985	0.998
FN1	ITGA5	9606.ENSP00000346839	9606.ENSP00000293379	0	0	0	0	0.153	0.87	0.9	0.989	0.999
FN1	VCAM1	9606.ENSP00000346839	9606.ENSP00000294728	0	0	0	0	0.098	0	0	0.951	0.954
FN1	ITGA2	9606.ENSP00000346839	9606.ENSP00000296585	0	0	0	0	0.087	0	0.9	0.735	0.973
FN1	COL1A2	9606.ENSP00000346839	9606.ENSP00000297268	0	0	0	0	0.518	0.225	0.9	0.689	0.986
FN1	CD248	9606.ENSP00000346839	9606.ENSP00000308117	0	0	0	0	0.147	0	0	0.984	0.987
FN1	PLAUR	9606.ENSP00000346839	9606.ENSP00000339328	0	0	0	0	0.062	0	0.9	0.844	0.984
FN1	ANXA1	9606.ENSP00000346839	9606.ENSP00000366109	0	0	0	0	0.091	0.063	0.9	0.425	0.944
FN1	ANGPT1	9606.ENSP00000346839	9606.ENSP00000428340	0	0	0	0	0.061	0.121	0.9	0.639	0.966
FN1	PLAU	9606.ENSP00000346839	9606.ENSP00000361850	0	0	0	0	0.102	0	0.9	0.69	0.969
FN1	LTBP1	9606.ENSP00000346839	9606.ENSP00000386043	0	0	0	0	0.202	0.213	0	0.973	0.982
FN1	SPP1	9606.ENSP00000346839	9606.ENSP00000378517	0	0	0	0	0.102	0	0	0.981	0.983
FN1	IGFBP3	9606.ENSP00000346839	9606.ENSP00000370473	0	0	0	0	0.303	0.486	0	0.961	0.985
FN1	HSPG2	9606.ENSP00000346839	9606.ENSP00000363827	0	0	0	0	0.199	0.277	0	0.986	0.991
FN1	VEGFA	9606.ENSP00000346839	9606.ENSP00000478570	0	0	0	0	0.076	0.27	0	0.989	0.992
FN1	POSTN	9606.ENSP00000346839	9606.ENSP00000369071	0	0	0	0	0.339	0	0	0.988	0.992
FN1	SDC1	9606.ENSP00000346839	9606.ENSP00000370542	0	0	0	0	0.117	0	0.8	0.988	0.997
FN1	CD44	9606.ENSP00000346839	9606.ENSP00000398632	0	0	0	0	0.062	0.27	0.8	0.989	0.998
FOSL1	ARC	9606.ENSP00000310170	9606.ENSP00000349022	0	0	0	0	0	0	0.9	0.075	0.903
FOXM1	AURKA	9606.ENSP00000342307	9606.ENSP00000216911	0	0	0	0	0.818	0	0	0.577	0.92
FOXM1	MYBL2	9606.ENSP00000342307	9606.ENSP00000217026	0	0	0	0	0.629	0.154	0.8	0.955	0.996
FOXM1	CCNB1	9606.ENSP00000342307	9606.ENSP00000256442	0	0	0	0	0.81	0.519	0.9	0.719	0.997
FOXM1	KIF11	9606.ENSP00000342307	9606.ENSP00000260731	0	0	0	0	0.87	0.058	0	0.346	0.913
FOXM1	CDK2	9606.ENSP00000342307	9606.ENSP00000266970	0	0	0	0	0.282	0.544	0.9	0.725	0.989
FOXM1	CCNA2	9606.ENSP00000342307	9606.ENSP00000274026	0	0	0	0	0.864	0.103	0.9	0.608	0.994
FOXM1	BUB1B	9606.ENSP00000342307	9606.ENSP00000287598	0	0	0	0	0.814	0.147	0	0.487	0.911
FOXM1	CCNB2	9606.ENSP00000342307	9606.ENSP00000288207	0	0	0	0	0.819	0.103	0.9	0.568	0.992
FOXM1	MELK	9606.ENSP00000342307	9606.ENSP00000298048	0	0	0	0	0.816	0.077	0	0.962	0.993
FOXM1	TPX2	9606.ENSP00000342307	9606.ENSP00000300403	0	0	0	0	0.903	0	0	0.423	0.942
FOXM1	BIRC5	9606.ENSP00000342307	9606.ENSP00000301633	0	0	0	0	0.81	0.059	0	0.601	0.922
FOXM1	BUB1	9606.ENSP00000342307	9606.ENSP00000302530	0	0	0	0	0.842	0.147	0	0.474	0.923
FOXM1	AURKB	9606.ENSP00000342307	9606.ENSP00000313950	0	0	0	0	0.842	0	0	0.694	0.949
FOXM1	KIF20A	9606.ENSP00000342307	9606.ENSP00000378356	0	0	0	0	0.845	0.058	0	0.519	0.923
FOXM1	HJURP	9606.ENSP00000342307	9606.ENSP00000414109	0	0	0	0	0.896	0	0	0.308	0.925
FOXM1	UBE2C	9606.ENSP00000342307	9606.ENSP00000348838	0	0	0	0	0.83	0.071	0	0.572	0.926
FOXM1	NUSAP1	9606.ENSP00000342307	9606.ENSP00000453403	0	0	0	0	0.889	0.07	0	0.365	0.928
FOXM1	KIF2C	9606.ENSP00000342307	9606.ENSP00000361298	0	0	0	0	0.898	0.058	0	0.39	0.936
FOXM1	CDCA8	9606.ENSP00000342307	9606.ENSP00000362146	0	0	0	0	0.907	0	0	0.392	0.941
FOXM1	TOP2A	9606.ENSP00000342307	9606.ENSP00000411532	0	0	0	0	0.848	0.27	0	0.517	0.941
FOXM1	MKI67	9606.ENSP00000342307	9606.ENSP00000357643	0	0	0	0	0.945	0	0	0.497	0.971
FOXM1	CDC20	9606.ENSP00000342307	9606.ENSP00000361540	0	0	0	0	0.961	0.058	0	0.526	0.981
FOXM1	CENPF	9606.ENSP00000342307	9606.ENSP00000355922	0	0	0	0	0.819	0	0.9	0.611	0.992
FOXM1	CDK1	9606.ENSP00000342307	9606.ENSP00000378699	0	0	0	0	0.835	0.543	0.9	0.643	0.996
FPR1	PLAUR	9606.ENSP00000471493	9606.ENSP00000339328	0	0	0	0	0.141	0	0.9	0.83	0.984
FPR1	FPR3	9606.ENSP00000471493	9606.ENSP00000341821	0	0	0	0.957	0.158	0	0.9	0.891	0.915
FPR1	ANXA1	9606.ENSP00000471493	9606.ENSP00000366109	0	0	0	0	0.062	0.462	0.6	0.988	0.997
FPR3	PLAUR	9606.ENSP00000341821	9606.ENSP00000339328	0	0	0	0	0.064	0	0.9	0.384	0.937
FPR3	FPR1	9606.ENSP00000341821	9606.ENSP00000471493	0	0	0	0.957	0.158	0	0.9	0.891	0.915
FPR3	ANXA1	9606.ENSP00000341821	9606.ENSP00000366109	0	0	0	0	0	0	0.6	0.989	0.995
FYB	HLA-DRB1	9606.ENSP00000427114	9606.ENSP00000353099	0	0	0	0	0.173	0	0.9	0.09	0.918
FYB	HLA-DRA	9606.ENSP00000427114	9606.ENSP00000378786	0	0	0	0	0.22	0	0.9	0.093	0.923
FZD6	CTHRC1	9606.ENSP00000351605	9606.ENSP00000330523	0	0	0	0	0.109	0	0.9	0.589	0.96
G0S2	HELZ2	9606.ENSP00000355996	9606.ENSP00000417401	0	0	0	0	0.065	0	0.9	0.105	0.909
GADD45A	AURKA	9606.ENSP00000360025	9606.ENSP00000216911	0	0	0	0	0	0.486	0.9	0.385	0.965
GADD45A	CCNB1	9606.ENSP00000360025	9606.ENSP00000256442	0	0	0	0	0	0.27	0.9	0.882	0.99
GADD45A	CDK1	9606.ENSP00000360025	9606.ENSP00000378699	0	0	0	0	0	0.874	0.9	0.934	0.999
GBP1	CXCL10	9606.ENSP00000359504	9606.ENSP00000305651	0	0	0	0	0.795	0	0	0.55	0.903
GBP1	STAT1	9606.ENSP00000359504	9606.ENSP00000354394	0	0	0	0	0.812	0	0	0.611	0.924
GBP2	OAS3	9606.ENSP00000359497	9606.ENSP00000228928	0	0	0	0	0.108	0	0.9	0.39	0.94
GBP2	EGR1	9606.ENSP00000359497	9606.ENSP00000239938	0	0	0	0	0.062	0	0.9	0.095	0.907
GBP2	IRF1	9606.ENSP00000359497	9606.ENSP00000245414	0	0	0	0	0.33	0	0.9	0.64	0.973
GBP2	OAS2	9606.ENSP00000359497	9606.ENSP00000342278	0	0	0	0	0.18	0	0.9	0.518	0.957
GBP2	IFI6	9606.ENSP00000359497	9606.ENSP00000342513	0	0	0	0	0.097	0	0.9	0.324	0.933
GBP2	STAT1	9606.ENSP00000359497	9606.ENSP00000354394	0	0	0	0	0.397	0	0.9	0.654	0.977
GBP2	OAS1	9606.ENSP00000359497	9606.ENSP00000388001	0	0	0	0	0.155	0	0.9	0.468	0.951
GBP2	RSAD2	9606.ENSP00000359497	9606.ENSP00000371471	0	0	0	0	0.122	0	0.9	0.515	0.953
GBP2	ISG15	9606.ENSP00000359497	9606.ENSP00000368699	0	0	0	0	0.117	0	0.9	0.518	0.953
GBP2	MX1	9606.ENSP00000359497	9606.ENSP00000381601	0	0	0	0	0.247	0	0.9	0.528	0.961
GLIPR1	HELZ2	9606.ENSP00000266659	9606.ENSP00000417401	0	0	0	0	0	0	0.9	0.048	0.9
GTSE1	CCNB1	9606.ENSP00000415430	9606.ENSP00000256442	0	0	0	0	0.608	0	0.9	0.383	0.973
GTSE1	CCNB2	9606.ENSP00000415430	9606.ENSP00000288207	0	0	0	0	0.79	0	0.9	0.48	0.988
GTSE1	AURKB	9606.ENSP00000415430	9606.ENSP00000313950	0	0	0	0	0.848	0	0	0.369	0.9
GTSE1	KIF2C	9606.ENSP00000415430	9606.ENSP00000361298	0	0	0	0	0.806	0	0	0.624	0.924
GTSE1	CDC20	9606.ENSP00000415430	9606.ENSP00000361540	0	0	0	0	0.88	0	0	0.448	0.931
GTSE1	CDK1	9606.ENSP00000415430	9606.ENSP00000378699	0	0	0	0	0.698	0	0.9	0.37	0.979
HELZ2	GLIPR1	9606.ENSP00000417401	9606.ENSP00000266659	0	0	0	0	0	0	0.9	0.048	0.9
HELZ2	G0S2	9606.ENSP00000417401	9606.ENSP00000355996	0	0	0	0	0.065	0	0.9	0.105	0.909
HJURP	OIP5	9606.ENSP00000414109	9606.ENSP00000220514	0	0	0	0	0.775	0.27	0.6	0.9	0.992
HJURP	TROAP	9606.ENSP00000414109	9606.ENSP00000257909	0	0	0	0	0.883	0	0	0.295	0.914
HJURP	KIF11	9606.ENSP00000414109	9606.ENSP00000260731	0	0	0	0	0.951	0	0	0.284	0.963
HJURP	NDC80	9606.ENSP00000414109	9606.ENSP00000261597	0	0	0	0	0.916	0	0	0.374	0.945
HJURP	CCNA2	9606.ENSP00000414109	9606.ENSP00000274026	0	0	0	0	0.904	0	0	0.264	0.926
HJURP	CENPU	9606.ENSP00000414109	9606.ENSP00000281453	0	0	0	0	0.615	0	0.6	0.493	0.915
HJURP	BUB1B	9606.ENSP00000414109	9606.ENSP00000287598	0	0	0	0	0.887	0	0	0.321	0.92
HJURP	CCNB2	9606.ENSP00000414109	9606.ENSP00000288207	0	0	0	0	0.901	0	0	0.247	0.922
HJURP	MELK	9606.ENSP00000414109	9606.ENSP00000298048	0	0	0	0	0.842	0	0	0.456	0.91
HJURP	TPX2	9606.ENSP00000414109	9606.ENSP00000300403	0	0	0	0	0.859	0	0	0.361	0.906
HJURP	BIRC5	9606.ENSP00000414109	9606.ENSP00000301633	0	0	0	0	0.888	0	0	0.262	0.913
HJURP	BUB1	9606.ENSP00000414109	9606.ENSP00000302530	0	0	0	0	0.918	0	0	0.366	0.946
HJURP	AURKB	9606.ENSP00000414109	9606.ENSP00000313950	0	0	0	0	0.886	0	0	0.37	0.925
HJURP	KIF15	9606.ENSP00000414109	9606.ENSP00000324020	0	0	0	0	0.888	0	0	0.286	0.917
HJURP	FOXM1	9606.ENSP00000414109	9606.ENSP00000342307	0	0	0	0	0.896	0	0	0.308	0.925
HJURP	UBE2C	9606.ENSP00000414109	9606.ENSP00000348838	0	0	0	0	0.889	0	0	0.374	0.927
HJURP	RRM2	9606.ENSP00000414109	9606.ENSP00000353770	0	0	0	0	0.885	0	0	0.261	0.911
HJURP	CENPF	9606.ENSP00000414109	9606.ENSP00000355922	0	0	0	0	0.894	0	0	0.376	0.931
HJURP	NEK2	9606.ENSP00000414109	9606.ENSP00000355966	0	0	0	0	0.912	0	0	0.209	0.928
HJURP	MKI67	9606.ENSP00000414109	9606.ENSP00000357643	0	0	0	0	0.918	0	0	0.211	0.933
HJURP	KIF2C	9606.ENSP00000414109	9606.ENSP00000361298	0	0	0	0	0.89	0	0	0.358	0.926
HJURP	CDC20	9606.ENSP00000414109	9606.ENSP00000361540	0	0	0	0	0.891	0	0	0.369	0.928
HJURP	CDCA8	9606.ENSP00000414109	9606.ENSP00000362146	0	0	0	0	0.892	0	0	0.401	0.932
HJURP	KIF20A	9606.ENSP00000414109	9606.ENSP00000378356	0	0	0	0	0.917	0	0	0.299	0.939
HJURP	CDK1	9606.ENSP00000414109	9606.ENSP00000378699	0	0	0	0	0.834	0	0	0.524	0.917
HJURP	TOP2A	9606.ENSP00000414109	9606.ENSP00000411532	0	0	0	0	0.901	0	0	0.376	0.936
HJURP	NUSAP1	9606.ENSP00000414109	9606.ENSP00000453403	0	0	0	0	0.906	0	0	0.392	0.94
HLA-DOA	CD74	9606.ENSP00000229829	9606.ENSP00000009530	0	0	0	0	0.171	0.152	0.9	0.343	0.947
HLA-DOA	HLA-DRA	9606.ENSP00000229829	9606.ENSP00000378786	0	0	0	0.952	0.19	0	0.9	0.696	0.918
HLA-DOA	HLA-DPA1	9606.ENSP00000229829	9606.ENSP00000393566	0	0	0	0.951	0.181	0	0.9	0.821	0.918
HLA-DOA	HLA-DQB2	9606.ENSP00000229829	9606.ENSP00000390431	0	0	0	0.679	0.129	0.212	0.9	0.646	0.94
HLA-DOA	HLA-DRB1	9606.ENSP00000229829	9606.ENSP00000353099	0	0	0	0.654	0.174	0.212	0.9	0.659	0.945
HLA-DOA	HLA-DPB1	9606.ENSP00000229829	9606.ENSP00000408146	0	0	0	0.686	0.219	0.212	0.9	0.689	0.947
HLA-DPA1	CD74	9606.ENSP00000393566	9606.ENSP00000009530	0	0	0	0	0.817	0.372	0.6	0.619	0.98
HLA-DPA1	CTSC	9606.ENSP00000393566	9606.ENSP00000227266	0	0	0	0	0.063	0	0.9	0.108	0.909
HLA-DPA1	HLA-DOA	9606.ENSP00000393566	9606.ENSP00000229829	0	0	0	0.951	0.181	0	0.9	0.821	0.918
HLA-DPA1	HLA-DRB1	9606.ENSP00000393566	9606.ENSP00000353099	0	0	0	0.648	0.574	0.345	0.9	0.773	0.977
HLA-DPA1	HLA-DQB1	9606.ENSP00000393566	9606.ENSP00000364080	0	0	0	0.653	0.373	0.345	0.72	0.883	0.913
HLA-DPA1	HLA-DRA	9606.ENSP00000393566	9606.ENSP00000378786	0	0	0	0.957	0.56	0	0.9	0.785	0.955
HLA-DPA1	HLA-DQB2	9606.ENSP00000393566	9606.ENSP00000390431	0	0	0	0.653	0.174	0.345	0.9	0.748	0.956
HLA-DPA1	PTPRC	9606.ENSP00000393566	9606.ENSP00000411355	0	0	0	0	0.254	0	0.9	0.119	0.928
HLA-DPA1	HLA-DPB1	9606.ENSP00000393566	9606.ENSP00000408146	0	0	0	0.68	0.435	0.91	0.9	0.928	0.996
HLA-DPB1	CD74	9606.ENSP00000408146	9606.ENSP00000009530	0	0	0	0	0.35	0.387	0.6	0.582	0.924
HLA-DPB1	CTSC	9606.ENSP00000408146	9606.ENSP00000227266	0	0	0	0	0.062	0	0.9	0.09	0.907
HLA-DPB1	HLA-DOA	9606.ENSP00000408146	9606.ENSP00000229829	0	0	0	0.686	0.219	0.212	0.9	0.689	0.947
HLA-DPB1	HLA-DRB1	9606.ENSP00000408146	9606.ENSP00000353099	0	0	0	0.962	0.347	0	0.9	0.871	0.934
HLA-DPB1	HLA-DRA	9606.ENSP00000408146	9606.ENSP00000378786	0	0	0	0.665	0.394	0.212	0.9	0.753	0.961
HLA-DPB1	HLA-DQB2	9606.ENSP00000408146	9606.ENSP00000390431	0	0	0	0.957	0.088	0	0.9	0.602	0.907
HLA-DPB1	HLA-DPA1	9606.ENSP00000408146	9606.ENSP00000393566	0	0	0	0.68	0.435	0.91	0.9	0.928	0.996
HLA-DPB1	PTPRC	9606.ENSP00000408146	9606.ENSP00000411355	0	0	0	0	0.152	0	0.9	0.133	0.92
HLA-DQA1	CD74	9606.ENSP00000339398	9606.ENSP00000009530	0	0	0	0	0.589	0.747	0.6	0.67	0.984
HLA-DQA1	CTSC	9606.ENSP00000339398	9606.ENSP00000227266	0	0	0	0	0.063	0	0.9	0.102	0.908
HLA-DQA1	HLA-DRB1	9606.ENSP00000339398	9606.ENSP00000353099	0	0	0	0.645	0.241	0.375	0.72	0.926	0.902
HLA-DQA1	PTPRC	9606.ENSP00000339398	9606.ENSP00000411355	0	0	0	0	0.177	0	0.9	0.321	0.939
HLA-DQA1	HLA-DQB2	9606.ENSP00000339398	9606.ENSP00000390431	0	0	0	0.672	0.552	0.94	0.72	0.66	0.993
HLA-DQA1	HLA-DQB1	9606.ENSP00000339398	9606.ENSP00000364080	0	0	0	0.641	0.556	0.994	0.72	0.926	0.999
HLA-DQA2	CD74	9606.ENSP00000364076	9606.ENSP00000009530	0	0	0	0	0.597	0.343	0.6	0.481	0.937
HLA-DQA2	CTSC	9606.ENSP00000364076	9606.ENSP00000227266	0	0	0	0	0.063	0	0.9	0.056	0.903
HLA-DQA2	PTPRC	9606.ENSP00000364076	9606.ENSP00000411355	0	0	0	0	0.11	0	0.9	0.134	0.916
HLA-DQA2	HLA-DQB1	9606.ENSP00000364076	9606.ENSP00000364080	0	0	0	0.629	0.492	0.826	0.6	0.904	0.974
HLA-DQA2	HLA-DQB2	9606.ENSP00000364076	9606.ENSP00000390431	0	0	0	0.664	0.515	0.94	0.6	0.774	0.99
HLA-DQB1	CD74	9606.ENSP00000364080	9606.ENSP00000009530	0	0	0	0	0.708	0.473	0.6	0.562	0.969
HLA-DQB1	CTSC	9606.ENSP00000364080	9606.ENSP00000227266	0	0	0	0	0.075	0	0.9	0.15	0.914
HLA-DQB1	HLA-DQA1	9606.ENSP00000364080	9606.ENSP00000339398	0	0	0	0.641	0.556	0.994	0.72	0.926	0.999
HLA-DQB1	HLA-DQA2	9606.ENSP00000364080	9606.ENSP00000364076	0	0	0	0.629	0.492	0.826	0.6	0.904	0.974
HLA-DQB1	HLA-DPA1	9606.ENSP00000364080	9606.ENSP00000393566	0	0	0	0.653	0.373	0.345	0.72	0.883	0.913
HLA-DQB1	HLA-DRA	9606.ENSP00000364080	9606.ENSP00000378786	0	0	0	0.641	0.407	0.345	0.72	0.811	0.915
HLA-DQB1	PTPRC	9606.ENSP00000364080	9606.ENSP00000411355	0	0	0	0	0.179	0	0.9	0.553	0.96
HLA-DQB2	CD74	9606.ENSP00000390431	9606.ENSP00000009530	0	0	0	0	0.815	0.061	0.6	0.667	0.973
HLA-DQB2	CTSC	9606.ENSP00000390431	9606.ENSP00000227266	0	0	0	0	0.082	0	0.9	0.063	0.906
HLA-DQB2	HLA-DOA	9606.ENSP00000390431	9606.ENSP00000229829	0	0	0	0.679	0.129	0.212	0.9	0.646	0.94
HLA-DQB2	HLA-DQA1	9606.ENSP00000390431	9606.ENSP00000339398	0	0	0	0.672	0.552	0.94	0.72	0.66	0.993
HLA-DQB2	HLA-DRB1	9606.ENSP00000390431	9606.ENSP00000353099	0	0	0	0.956	0.31	0	0.9	0.685	0.93
HLA-DQB2	HLA-DQA2	9606.ENSP00000390431	9606.ENSP00000364076	0	0	0	0.664	0.515	0.94	0.6	0.774	0.99
HLA-DQB2	HLA-DRA	9606.ENSP00000390431	9606.ENSP00000378786	0	0	0	0.66	0.174	0.345	0.9	0.652	0.953
HLA-DQB2	HLA-DPB1	9606.ENSP00000390431	9606.ENSP00000408146	0	0	0	0.957	0.088	0	0.9	0.602	0.907
HLA-DQB2	HLA-DPA1	9606.ENSP00000390431	9606.ENSP00000393566	0	0	0	0.653	0.174	0.345	0.9	0.748	0.956
HLA-DQB2	PTPRC	9606.ENSP00000390431	9606.ENSP00000411355	0	0	0	0	0.117	0	0.9	0.628	0.964
HLA-DRA	CD74	9606.ENSP00000378786	9606.ENSP00000009530	0	0	0	0	0.919	0.868	0.9	0.629	0.999
HLA-DRA	CTSC	9606.ENSP00000378786	9606.ENSP00000227266	0	0	0	0	0.066	0	0.9	0.26	0.924
HLA-DRA	HLA-DOA	9606.ENSP00000378786	9606.ENSP00000229829	0	0	0	0.952	0.19	0	0.9	0.696	0.918
HLA-DRA	HLA-DRB1	9606.ENSP00000378786	9606.ENSP00000353099	0	0	0	0.642	0.869	0.992	0.9	0.908	0.999
HLA-DRA	HLA-DQB1	9606.ENSP00000378786	9606.ENSP00000364080	0	0	0	0.641	0.407	0.345	0.72	0.811	0.915
HLA-DRA	HLA-DRB5	9606.ENSP00000378786	9606.ENSP00000364114	0	0	0	0.647	0.693	0.961	0.72	0.77	0.997
HLA-DRA	FYB	9606.ENSP00000378786	9606.ENSP00000427114	0	0	0	0	0.22	0	0.9	0.093	0.923
HLA-DRA	PTPRC	9606.ENSP00000378786	9606.ENSP00000411355	0	0	0	0	0.326	0	0.9	0.289	0.947
HLA-DRA	HLA-DQB2	9606.ENSP00000378786	9606.ENSP00000390431	0	0	0	0.66	0.174	0.345	0.9	0.652	0.953
HLA-DRA	HLA-DPA1	9606.ENSP00000378786	9606.ENSP00000393566	0	0	0	0.957	0.56	0	0.9	0.785	0.955
HLA-DRA	HLA-DPB1	9606.ENSP00000378786	9606.ENSP00000408146	0	0	0	0.665	0.394	0.212	0.9	0.753	0.961
HLA-DRB1	CD74	9606.ENSP00000353099	9606.ENSP00000009530	0	0	0	0	0.871	0.173	0.9	0.535	0.994
HLA-DRB1	CTSC	9606.ENSP00000353099	9606.ENSP00000227266	0	0	0	0	0.063	0	0.9	0.117	0.91
HLA-DRB1	HLA-DOA	9606.ENSP00000353099	9606.ENSP00000229829	0	0	0	0.654	0.174	0.212	0.9	0.659	0.945
HLA-DRB1	HLA-DQA1	9606.ENSP00000353099	9606.ENSP00000339398	0	0	0	0.645	0.241	0.375	0.72	0.926	0.902
HLA-DRB1	FYB	9606.ENSP00000353099	9606.ENSP00000427114	0	0	0	0	0.173	0	0.9	0.09	0.918
HLA-DRB1	HLA-DQB2	9606.ENSP00000353099	9606.ENSP00000390431	0	0	0	0.956	0.31	0	0.9	0.685	0.93
HLA-DRB1	HLA-DPB1	9606.ENSP00000353099	9606.ENSP00000408146	0	0	0	0.962	0.347	0	0.9	0.871	0.934
HLA-DRB1	HLA-DRB5	9606.ENSP00000353099	9606.ENSP00000364114	0	0	0	0.983	0.289	0.742	0.72	0.77	0.944
HLA-DRB1	PTPRC	9606.ENSP00000353099	9606.ENSP00000411355	0	0	0	0	0.221	0	0.9	0.417	0.95
HLA-DRB1	HLA-DPA1	9606.ENSP00000353099	9606.ENSP00000393566	0	0	0	0.648	0.574	0.345	0.9	0.773	0.977
HLA-DRB1	HLA-DRA	9606.ENSP00000353099	9606.ENSP00000378786	0	0	0	0.642	0.869	0.992	0.9	0.908	0.999
HLA-DRB5	CD74	9606.ENSP00000364114	9606.ENSP00000009530	0	0	0	0	0.769	0.173	0.6	0.369	0.945
HLA-DRB5	CTSC	9606.ENSP00000364114	9606.ENSP00000227266	0	0	0	0	0.063	0	0.9	0.216	0.92
HLA-DRB5	HLA-DRB1	9606.ENSP00000364114	9606.ENSP00000353099	0	0	0	0.983	0.289	0.742	0.72	0.77	0.944
HLA-DRB5	PTPRC	9606.ENSP00000364114	9606.ENSP00000411355	0	0	0	0	0.105	0	0.9	0.249	0.926
HLA-DRB5	HLA-DRA	9606.ENSP00000364114	9606.ENSP00000378786	0	0	0	0.647	0.693	0.961	0.72	0.77	0.997
HSPG2	NID2	9606.ENSP00000363827	9606.ENSP00000216286	0	0	0	0	0.196	0.792	0.6	0.897	0.992
HSPG2	ITGA2	9606.ENSP00000363827	9606.ENSP00000296585	0	0	0	0	0.096	0.479	0.8	0.348	0.93
HSPG2	MMP14	9606.ENSP00000363827	9606.ENSP00000308208	0	0	0	0	0.231	0	0.9	0.436	0.952
HSPG2	FN1	9606.ENSP00000363827	9606.ENSP00000346839	0	0	0	0	0.199	0.277	0	0.986	0.991
HSPG2	VEGFA	9606.ENSP00000363827	9606.ENSP00000478570	0	0	0	0	0.077	0	0.8	0.789	0.957
IBSP	COL4A1	9606.ENSP00000226284	9606.ENSP00000364979	0	0	0	0	0	0	0.9	0.102	0.906
IBSP	COL4A2	9606.ENSP00000226284	9606.ENSP00000353654	0	0	0	0	0	0	0.9	0.143	0.91
IBSP	SPP1	9606.ENSP00000226284	9606.ENSP00000378517	0	0	0	0	0.089	0	0	0.911	0.916
ICAM1	CD44	9606.ENSP00000264832	9606.ENSP00000398632	0	0	0	0	0.098	0	0	0.904	0.909
ICAM1	VCAM1	9606.ENSP00000264832	9606.ENSP00000294728	0	0	0	0	0.069	0	0	0.928	0.93
ICAM1	IL1R1	9606.ENSP00000264832	9606.ENSP00000386380	0	0	0	0	0.097	0	0.9	0.467	0.947
ICAM1	MSN	9606.ENSP00000264832	9606.ENSP00000353408	0	0	0	0	0.096	0.354	0.8	0.614	0.949
IFI6	OAS3	9606.ENSP00000342513	9606.ENSP00000228928	0	0	0	0	0.78	0	0.9	0.652	0.991
IFI6	EGR1	9606.ENSP00000342513	9606.ENSP00000239938	0	0	0	0	0	0	0.9	0.168	0.913
IFI6	IRF1	9606.ENSP00000342513	9606.ENSP00000245414	0	0	0	0	0.077	0	0.9	0.503	0.95
IFI6	OAS2	9606.ENSP00000342513	9606.ENSP00000342278	0	0	0	0	0.774	0	0.9	0.61	0.99
IFI6	GBP2	9606.ENSP00000342513	9606.ENSP00000359497	0	0	0	0	0.097	0	0.9	0.324	0.933
IFI6	STAT1	9606.ENSP00000342513	9606.ENSP00000354394	0	0	0	0	0.683	0	0.9	0.562	0.984
IFI6	RSAD2	9606.ENSP00000342513	9606.ENSP00000371471	0	0	0	0	0.733	0	0.9	0.653	0.989
IFI6	OAS1	9606.ENSP00000342513	9606.ENSP00000388001	0	0	0	0	0.833	0	0.9	0.703	0.994
IFI6	MX1	9606.ENSP00000342513	9606.ENSP00000381601	0	0	0	0	0.847	0	0.9	0.69	0.994
IFI6	ISG15	9606.ENSP00000342513	9606.ENSP00000368699	0	0	0	0	0.873	0	0.9	0.715	0.996
IGFBP2	ITGA5	9606.ENSP00000233809	9606.ENSP00000293379	0	0	0	0	0.062	0	0	0.953	0.954
IGFBP3	EGFR	9606.ENSP00000370473	9606.ENSP00000275493	0	0	0	0	0.278	0.27	0	0.949	0.971
IGFBP3	CAV1	9606.ENSP00000370473	9606.ENSP00000339191	0	0	0	0	0.3	0.213	0	0.912	0.947
IGFBP3	FN1	9606.ENSP00000370473	9606.ENSP00000346839	0	0	0	0	0.303	0.486	0	0.961	0.985
IL13RA2	CHI3L1	9606.ENSP00000361004	9606.ENSP00000255409	0	0	0	0	0	0.746	0	0.8	0.947
IL1R1	ICAM1	9606.ENSP00000386380	9606.ENSP00000264832	0	0	0	0	0.097	0	0.9	0.467	0.947
IL1R1	IL1RAP	9606.ENSP00000386380	9606.ENSP00000314807	0	0	0	0.636	0.062	0.976	0.9	0.989	0.998
IL1RAP	IL1R1	9606.ENSP00000314807	9606.ENSP00000386380	0	0	0	0.636	0.062	0.976	0.9	0.989	0.998
IQGAP1	VEGFA	9606.ENSP00000268182	9606.ENSP00000478570	0	0	0	0	0	0	0.9	0.295	0.926
IQGAP1	CD44	9606.ENSP00000268182	9606.ENSP00000398632	0	0	0	0	0.109	0.27	0.8	0.968	0.995
IRF1	OAS3	9606.ENSP00000245414	9606.ENSP00000228928	0	0	0	0	0.108	0	0.9	0.45	0.946
IRF1	EGR1	9606.ENSP00000245414	9606.ENSP00000239938	0	0	0	0	0.062	0	0.9	0.469	0.945
IRF1	IFI6	9606.ENSP00000245414	9606.ENSP00000342513	0	0	0	0	0.077	0	0.9	0.503	0.95
IRF1	OAS1	9606.ENSP00000245414	9606.ENSP00000388001	0	0	0	0	0.137	0	0.9	0.593	0.961
IRF1	OAS2	9606.ENSP00000245414	9606.ENSP00000342278	0	0	0	0	0.16	0	0.9	0.583	0.962
IRF1	ISG15	9606.ENSP00000245414	9606.ENSP00000368699	0	0	0	0	0.111	0	0.9	0.714	0.972
IRF1	RSAD2	9606.ENSP00000245414	9606.ENSP00000371471	0	0	0	0	0.141	0	0.9	0.7	0.972
IRF1	GBP2	9606.ENSP00000245414	9606.ENSP00000359497	0	0	0	0	0.33	0	0.9	0.64	0.973
IRF1	MX1	9606.ENSP00000245414	9606.ENSP00000381601	0	0	0	0	0.177	0	0.9	0.745	0.977
IRF1	STAT1	9606.ENSP00000245414	9606.ENSP00000354394	0	0	0	0	0.381	0.878	0.9	0.983	0.999
ISG15	OAS3	9606.ENSP00000368699	9606.ENSP00000228928	0	0	0	0	0.828	0	0.9	0.715	0.994
ISG15	EGR1	9606.ENSP00000368699	9606.ENSP00000239938	0	0	0	0	0.062	0.077	0.9	0.175	0.919
ISG15	IRF1	9606.ENSP00000368699	9606.ENSP00000245414	0	0	0	0	0.111	0	0.9	0.714	0.972
ISG15	OAS2	9606.ENSP00000368699	9606.ENSP00000342278	0	0	0	0	0.785	0	0.9	0.759	0.994
ISG15	IFI6	9606.ENSP00000368699	9606.ENSP00000342513	0	0	0	0	0.873	0	0.9	0.715	0.996
ISG15	STAT1	9606.ENSP00000368699	9606.ENSP00000354394	0	0	0	0	0.783	0.07	0.6	0.84	0.985
ISG15	GBP2	9606.ENSP00000368699	9606.ENSP00000359497	0	0	0	0	0.117	0	0.9	0.518	0.953
ISG15	MX1	9606.ENSP00000368699	9606.ENSP00000381601	0	0	0	0	0.882	0.149	0.6	0.88	0.994
ISG15	OAS1	9606.ENSP00000368699	9606.ENSP00000388001	0	0	0	0	0.891	0	0.9	0.804	0.997
ISG15	RSAD2	9606.ENSP00000368699	9606.ENSP00000371471	0	0	0	0	0.825	0	0.9	0.883	0.997
ITGA2	ITGA3	9606.ENSP00000296585	9606.ENSP00000007722	0	0	0	0.585	0.138	0	0.9	0.705	0.935
ITGA2	LAMB1	9606.ENSP00000296585	9606.ENSP00000222399	0	0	0	0	0.118	0.103	0.9	0.379	0.944
ITGA2	COL1A1	9606.ENSP00000296585	9606.ENSP00000225964	0	0	0	0	0.069	0.463	0.9	0.402	0.966
ITGA2	LAMC1	9606.ENSP00000296585	9606.ENSP00000258341	0	0	0	0	0.103	0.153	0.9	0.299	0.939
ITGA2	TNC	9606.ENSP00000296585	9606.ENSP00000265131	0	0	0	0	0.106	0.151	0.9	0.088	0.921
ITGA2	ITGA5	9606.ENSP00000296585	9606.ENSP00000293379	0	0	0	0.606	0.054	0	0.9	0.736	0.929
ITGA2	COL4A2	9606.ENSP00000296585	9606.ENSP00000353654	0	0	0	0	0.076	0	0.9	0.277	0.927
ITGA2	HSPG2	9606.ENSP00000296585	9606.ENSP00000363827	0	0	0	0	0.096	0.479	0.8	0.348	0.93
ITGA2	MET	9606.ENSP00000296585	9606.ENSP00000317272	0	0	0	0	0.154	0.114	0.9	0.208	0.932
ITGA2	COL6A2	9606.ENSP00000296585	9606.ENSP00000300527	0	0	0	0	0.062	0	0.9	0.346	0.933
ITGA2	LAMA2	9606.ENSP00000296585	9606.ENSP00000400365	0	0	0	0	0.062	0.212	0.9	0.273	0.939
ITGA2	COL4A1	9606.ENSP00000296585	9606.ENSP00000364979	0	0	0	0	0.07	0	0.9	0.477	0.947
ITGA2	COL3A1	9606.ENSP00000296585	9606.ENSP00000304408	0	0	0	0	0.062	0.297	0.9	0.341	0.95
ITGA2	COL1A2	9606.ENSP00000296585	9606.ENSP00000297268	0	0	0	0	0.062	0.463	0.9	0.36	0.963
ITGA2	FN1	9606.ENSP00000296585	9606.ENSP00000346839	0	0	0	0	0.087	0	0.9	0.735	0.973
ITGA3	VEGFA	9606.ENSP00000007722	9606.ENSP00000478570	0	0	0	0	0.068	0	0.9	0.276	0.926
ITGA3	PLAU	9606.ENSP00000007722	9606.ENSP00000361850	0	0	0	0	0.098	0	0.9	0.27	0.928
ITGA3	ITGA2	9606.ENSP00000007722	9606.ENSP00000296585	0	0	0	0.585	0.138	0	0.9	0.705	0.935
ITGA3	THBS1	9606.ENSP00000007722	9606.ENSP00000260356	0	0	0	0	0.093	0.112	0.9	0.404	0.945
ITGA3	LAMA2	9606.ENSP00000007722	9606.ENSP00000400365	0	0	0	0	0.062	0.211	0.9	0.375	0.947
ITGA3	PLAUR	9606.ENSP00000007722	9606.ENSP00000339328	0	0	0	0	0	0	0.9	0.501	0.948
ITGA3	ITGA5	9606.ENSP00000007722	9606.ENSP00000293379	0	0	0	0.636	0.085	0.293	0.9	0.795	0.949
ITGA3	MET	9606.ENSP00000007722	9606.ENSP00000317272	0	0	0	0	0.171	0.114	0.9	0.445	0.953
ITGA3	LAMB1	9606.ENSP00000007722	9606.ENSP00000222399	0	0	0	0	0.158	0.177	0.9	0.418	0.954
ITGA3	EGFR	9606.ENSP00000007722	9606.ENSP00000275493	0	0	0	0	0.189	0	0.9	0.486	0.954
ITGA3	LAMC1	9606.ENSP00000007722	9606.ENSP00000258341	0	0	0	0	0.117	0.153	0.9	0.514	0.958
ITGA3	FN1	9606.ENSP00000007722	9606.ENSP00000346839	0	0	0	0	0.111	0.462	0.8	0.972	0.997
ITGA5	ITGA3	9606.ENSP00000293379	9606.ENSP00000007722	0	0	0	0.636	0.085	0.293	0.9	0.795	0.949
ITGA5	IGFBP2	9606.ENSP00000293379	9606.ENSP00000233809	0	0	0	0	0.062	0	0	0.953	0.954
ITGA5	ITGA2	9606.ENSP00000293379	9606.ENSP00000296585	0	0	0	0.606	0.054	0	0.9	0.736	0.929
ITGA5	ANGPT1	9606.ENSP00000293379	9606.ENSP00000428340	0	0	0	0	0	0.225	0.9	0.233	0.935
ITGA5	PLAUR	9606.ENSP00000293379	9606.ENSP00000339328	0	0	0	0	0.17	0	0.9	0.346	0.941
ITGA5	PLAU	9606.ENSP00000293379	9606.ENSP00000361850	0	0	0	0	0.18	0	0.9	0.415	0.947
ITGA5	FN1	9606.ENSP00000293379	9606.ENSP00000346839	0	0	0	0	0.153	0.87	0.9	0.989	0.999
KIAA0101	CCNB1	9606.ENSP00000300035	9606.ENSP00000256442	0	0	0	0	0.892	0	0	0.308	0.922
KIAA0101	KIF11	9606.ENSP00000300035	9606.ENSP00000260731	0	0	0	0	0.935	0	0	0.307	0.953
KIAA0101	NDC80	9606.ENSP00000300035	9606.ENSP00000261597	0	0	0	0	0.918	0	0	0	0.918
KIAA0101	CCNA2	9606.ENSP00000300035	9606.ENSP00000274026	0	0	0	0	0.959	0	0	0.249	0.967
KIAA0101	BUB1B	9606.ENSP00000300035	9606.ENSP00000287598	0	0	0	0	0.921	0	0	0.318	0.944
KIAA0101	CCNB2	9606.ENSP00000300035	9606.ENSP00000288207	0	0	0	0	0.936	0	0	0.294	0.953
KIAA0101	MELK	9606.ENSP00000300035	9606.ENSP00000298048	0	0	0	0	0.868	0	0	0.391	0.916
KIAA0101	PRC1	9606.ENSP00000300035	9606.ENSP00000377793	0	0	0	0	0.834	0	0	0.43	0.901
KIAA0101	BIRC5	9606.ENSP00000300035	9606.ENSP00000301633	0	0	0	0	0.893	0	0	0.345	0.927
KIAA0101	AURKB	9606.ENSP00000300035	9606.ENSP00000313950	0	0	0	0	0.922	0	0	0.161	0.932
KIAA0101	CDCA8	9606.ENSP00000300035	9606.ENSP00000362146	0	0	0	0	0.918	0	0	0.225	0.934
KIAA0101	BUB1	9606.ENSP00000300035	9606.ENSP00000302530	0	0	0	0	0.922	0	0	0.186	0.934
KIAA0101	RRM2	9606.ENSP00000300035	9606.ENSP00000353770	0	0	0	0	0.917	0	0	0.325	0.941
KIAA0101	NUSAP1	9606.ENSP00000300035	9606.ENSP00000453403	0	0	0	0	0.891	0	0	0.517	0.945
KIAA0101	KIF20A	9606.ENSP00000300035	9606.ENSP00000378356	0	0	0	0	0.919	0	0	0.391	0.949
KIAA0101	UBE2C	9606.ENSP00000300035	9606.ENSP00000348838	0	0	0	0	0.937	0	0	0.316	0.955
KIAA0101	CDK1	9606.ENSP00000300035	9606.ENSP00000378699	0	0	0	0	0.942	0	0	0.283	0.956
KIAA0101	CDC20	9606.ENSP00000300035	9606.ENSP00000361540	0	0	0	0	0.939	0	0	0.332	0.958
KIAA0101	TOP2A	9606.ENSP00000300035	9606.ENSP00000411532	0	0	0	0	0.959	0	0	0.42	0.975
KIF11	TRIP13	9606.ENSP00000260731	9606.ENSP00000166345	0	0	0	0	0.878	0	0	0.274	0.908
KIF11	AURKA	9606.ENSP00000260731	9606.ENSP00000216911	0	0	0	0	0.946	0.417	0	0.869	0.995
KIF11	NCAPH	9606.ENSP00000260731	9606.ENSP00000240423	0	0	0	0	0.918	0.15	0	0.422	0.956
KIF11	NCAPG	9606.ENSP00000260731	9606.ENSP00000251496	0	0	0	0	0.985	0.155	0	0.508	0.993
KIF11	CCNB1	9606.ENSP00000260731	9606.ENSP00000256442	0	0	0	0	0.935	0.248	0	0.758	0.987
KIF11	PTTG1	9606.ENSP00000260731	9606.ENSP00000377536	0	0	0	0	0.8	0	0	0.535	0.903
KIF11	TYMS	9606.ENSP00000260731	9606.ENSP00000315644	0	0	0	0	0.897	0	0	0.182	0.912
KIF11	FOXM1	9606.ENSP00000260731	9606.ENSP00000342307	0	0	0	0	0.87	0.058	0	0.346	0.913
KIF11	MELK	9606.ENSP00000260731	9606.ENSP00000298048	0	0	0	0	0.907	0	0	0.385	0.94
KIF11	ECT2	9606.ENSP00000260731	9606.ENSP00000376457	0	0	0	0	0.916	0.059	0	0.358	0.945
KIF11	ARHGAP11A	9606.ENSP00000260731	9606.ENSP00000355090	0	0	0	0	0.931	0.078	0	0.251	0.948
KIF11	KIF18B	9606.ENSP00000260731	9606.ENSP00000465992	0	0	0	0.661	0.832	0.284	0.5	0.723	0.95
KIF11	KIAA0101	9606.ENSP00000260731	9606.ENSP00000300035	0	0	0	0	0.935	0	0	0.307	0.953
KIF11	CDC45	9606.ENSP00000260731	9606.ENSP00000405726	0	0	0	0	0.943	0	0	0.235	0.954
KIF11	PLK4	9606.ENSP00000260731	9606.ENSP00000270861	0	0	0	0	0.879	0.143	0	0.604	0.955
KIF11	HJURP	9606.ENSP00000260731	9606.ENSP00000414109	0	0	0	0	0.951	0	0	0.284	0.963
KIF11	UBE2C	9606.ENSP00000260731	9606.ENSP00000348838	0	0	0	0	0.936	0.077	0	0.43	0.963
KIF11	CENPF	9606.ENSP00000260731	9606.ENSP00000355922	0	0	0	0	0.925	0	0	0.563	0.966
KIF11	PBK	9606.ENSP00000260731	9606.ENSP00000428489	0	0	0	0	0.942	0.104	0	0.437	0.968
KIF11	TACC3	9606.ENSP00000260731	9606.ENSP00000326550	0	0	0	0	0.907	0.145	0	0.63	0.968
KIF11	NEK2	9606.ENSP00000260731	9606.ENSP00000355966	0	0	0	0	0.92	0.082	0	0.614	0.969
KIF11	KIF2C	9606.ENSP00000260731	9606.ENSP00000361298	0	0	0	0.638	0.921	0	0.5	0.838	0.971
KIF11	RRM2	9606.ENSP00000260731	9606.ENSP00000353770	0	0	0	0	0.934	0	0	0.628	0.974
KIF11	KIFC1	9606.ENSP00000260731	9606.ENSP00000393963	0	0	0	0.645	0.699	0.787	0.5	0.873	0.975
KIF11	MKI67	9606.ENSP00000260731	9606.ENSP00000357643	0	0	0	0	0.959	0.102	0	0.388	0.975
KIF11	BIRC5	9606.ENSP00000260731	9606.ENSP00000301633	0	0	0	0	0.951	0.078	0	0.533	0.977
KIF11	SMC4	9606.ENSP00000260731	9606.ENSP00000349961	0	0	0	0	0.966	0.122	0	0.435	0.981
KIF11	CDCA8	9606.ENSP00000260731	9606.ENSP00000362146	0	0	0	0	0.963	0	0	0.569	0.983
KIF11	KIF4A	9606.ENSP00000260731	9606.ENSP00000363524	0	0	0	0.649	0.959	0	0.5	0.826	0.984
KIF11	TOP2A	9606.ENSP00000260731	9606.ENSP00000411532	0	0	0	0	0.968	0	0	0.624	0.987
KIF11	KIF15	9606.ENSP00000260731	9606.ENSP00000324020	0	0	0	0.634	0.963	0.079	0.5	0.924	0.987
KIF11	NUF2	9606.ENSP00000260731	9606.ENSP00000271452	0	0	0	0	0.944	0.138	0	0.761	0.987
KIF11	CCNA2	9606.ENSP00000260731	9606.ENSP00000274026	0	0	0	0	0.976	0.139	0	0.526	0.989
KIF11	KIF20A	9606.ENSP00000260731	9606.ENSP00000378356	0	0	0	0.58	0.966	0.139	0.5	0.749	0.989
KIF11	CCNB2	9606.ENSP00000260731	9606.ENSP00000288207	0	0	0	0	0.964	0.248	0	0.733	0.992
KIF11	NUSAP1	9606.ENSP00000260731	9606.ENSP00000453403	0	0	0	0	0.986	0	0	0.578	0.993
KIF11	AURKB	9606.ENSP00000260731	9606.ENSP00000313950	0	0	0	0	0.959	0.29	0	0.804	0.993
KIF11	BUB1B	9606.ENSP00000260731	9606.ENSP00000287598	0	0	0	0	0.964	0.369	0	0.769	0.994
KIF11	PRC1	9606.ENSP00000260731	9606.ENSP00000377793	0	0	0	0	0.963	0.369	0	0.767	0.994
KIF11	NDC80	9606.ENSP00000260731	9606.ENSP00000261597	0	0	0	0	0.975	0.181	0	0.795	0.995
KIF11	CDC20	9606.ENSP00000260731	9606.ENSP00000361540	0	0	0	0	0.981	0.243	0	0.717	0.995
KIF11	BUB1	9606.ENSP00000260731	9606.ENSP00000302530	0	0	0	0	0.989	0.369	0	0.724	0.997
KIF11	TPX2	9606.ENSP00000260731	9606.ENSP00000300403	0	0	0	0	0.958	0	0	0.934	0.997
KIF11	CDK1	9606.ENSP00000260731	9606.ENSP00000378699	0	0	0	0	0.987	0.559	0	0.835	0.998
KIF15	AURKA	9606.ENSP00000324020	9606.ENSP00000216911	0	0	0	0	0.755	0.146	0.9	0.638	0.991
KIF15	NCAPH	9606.ENSP00000324020	9606.ENSP00000240423	0	0	0	0	0.918	0.15	0	0.464	0.959
KIF15	NCAPG	9606.ENSP00000324020	9606.ENSP00000251496	0	0	0	0	0.977	0.077	0	0.49	0.988
KIF15	CCNB1	9606.ENSP00000324020	9606.ENSP00000256442	0	0	0	0	0.835	0.139	0	0.401	0.907
KIF15	KIF11	9606.ENSP00000324020	9606.ENSP00000260731	0	0	0	0.634	0.963	0.079	0.5	0.924	0.987
KIF15	NDC80	9606.ENSP00000324020	9606.ENSP00000261597	0	0	0	0	0.924	0.181	0	0.453	0.963
KIF15	CCNA2	9606.ENSP00000324020	9606.ENSP00000274026	0	0	0	0	0.933	0.139	0	0.315	0.957
KIF15	BUB1B	9606.ENSP00000324020	9606.ENSP00000287598	0	0	0	0	0.919	0.183	0	0.377	0.955
KIF15	CCNB2	9606.ENSP00000324020	9606.ENSP00000288207	0	0	0	0	0.889	0.139	0	0.465	0.944
KIF15	TPX2	9606.ENSP00000324020	9606.ENSP00000300403	0	0	0	0	0.82	0	0.9	0.948	0.999
KIF15	BUB1	9606.ENSP00000324020	9606.ENSP00000302530	0	0	0	0	0.909	0.183	0	0.499	0.959
KIF15	AURKB	9606.ENSP00000324020	9606.ENSP00000313950	0	0	0	0	0.886	0.146	0	0.636	0.961
KIF15	RRM2	9606.ENSP00000324020	9606.ENSP00000353770	0	0	0	0	0.889	0	0	0.193	0.906
KIF15	NEK2	9606.ENSP00000324020	9606.ENSP00000355966	0	0	0	0	0.852	0.058	0	0.4	0.909
KIF15	HJURP	9606.ENSP00000324020	9606.ENSP00000414109	0	0	0	0	0.888	0	0	0.286	0.917
KIF15	CDK1	9606.ENSP00000324020	9606.ENSP00000378699	0	0	0	0	0.849	0.152	0	0.481	0.928
KIF15	CDCA8	9606.ENSP00000324020	9606.ENSP00000362146	0	0	0	0	0.891	0	0	0.369	0.928
KIF15	CDC20	9606.ENSP00000324020	9606.ENSP00000361540	0	0	0	0	0.891	0.102	0	0.333	0.929
KIF15	SMC4	9606.ENSP00000324020	9606.ENSP00000349961	0	0	0	0	0.901	0.122	0	0.318	0.935
KIF15	CENPF	9606.ENSP00000324020	9606.ENSP00000355922	0	0	0	0	0.902	0	0	0.462	0.945
KIF15	NUSAP1	9606.ENSP00000324020	9606.ENSP00000453403	0	0	0	0	0.886	0	0	0.535	0.945
KIF15	KIF4A	9606.ENSP00000324020	9606.ENSP00000363524	0	0	0	0.633	0.864	0	0.5	0.758	0.948
KIF15	TOP2A	9606.ENSP00000324020	9606.ENSP00000411532	0	0	0	0	0.928	0	0	0.398	0.954
KIF15	KIF2C	9606.ENSP00000324020	9606.ENSP00000361298	0	0	0	0.606	0.893	0	0.5	0.68	0.959
KIF15	KIF20A	9606.ENSP00000324020	9606.ENSP00000378356	0	0	0	0.578	0.914	0	0.5	0.521	0.964
KIF15	MKI67	9606.ENSP00000324020	9606.ENSP00000357643	0	0	0	0	0.909	0.316	0	0.713	0.98
KIF18B	KIF11	9606.ENSP00000465992	9606.ENSP00000260731	0	0	0	0.661	0.832	0.284	0.5	0.723	0.95
KIF18B	BUB1B	9606.ENSP00000465992	9606.ENSP00000287598	0	0	0	0	0.825	0.183	0	0.436	0.912
KIF18B	MKI67	9606.ENSP00000465992	9606.ENSP00000357643	0	0	0	0	0.883	0.359	0	0.043	0.922
KIF18B	KIF2C	9606.ENSP00000465992	9606.ENSP00000361298	0	0	0	0.662	0.827	0.204	0.5	0.954	0.949
KIF18B	CDC20	9606.ENSP00000465992	9606.ENSP00000361540	0	0	0	0	0.894	0.102	0	0.174	0.915
KIF18B	CDCA8	9606.ENSP00000465992	9606.ENSP00000362146	0	0	0	0	0.883	0	0	0.29	0.913
KIF18B	KIF20A	9606.ENSP00000465992	9606.ENSP00000378356	0	0	0	0.581	0.831	0	0.5	0.601	0.933
KIF18B	KIFC1	9606.ENSP00000465992	9606.ENSP00000393963	0	0	0	0.624	0.818	0.345	0.5	0.663	0.951
KIF20A	AURKA	9606.ENSP00000378356	9606.ENSP00000216911	0	0	0	0	0.942	0.146	0	0.564	0.976
KIF20A	NCAPH	9606.ENSP00000378356	9606.ENSP00000240423	0	0	0	0	0.812	0.245	0	0.379	0.904
KIF20A	NCAPG	9606.ENSP00000378356	9606.ENSP00000251496	0	0	0	0	0.948	0.077	0	0.471	0.972
KIF20A	CCNB1	9606.ENSP00000378356	9606.ENSP00000256442	0	0	0	0	0.964	0.139	0	0.611	0.986
KIF20A	TROAP	9606.ENSP00000378356	9606.ENSP00000257909	0	0	0	0	0.899	0	0	0.31	0.927
KIF20A	KIF11	9606.ENSP00000378356	9606.ENSP00000260731	0	0	0	0.58	0.966	0.139	0.5	0.749	0.989
KIF20A	NDC80	9606.ENSP00000378356	9606.ENSP00000261597	0	0	0	0	0.931	0.181	0	0.298	0.957
KIF20A	ASF1B	9606.ENSP00000378356	9606.ENSP00000263382	0	0	0	0	0.887	0	0	0.315	0.919
KIF20A	NUF2	9606.ENSP00000378356	9606.ENSP00000271452	0	0	0	0	0.826	0.138	0	0.533	0.924
KIF20A	CCNA2	9606.ENSP00000378356	9606.ENSP00000274026	0	0	0	0	0.938	0.139	0	0.468	0.969
KIF20A	BUB1B	9606.ENSP00000378356	9606.ENSP00000287598	0	0	0	0	0.931	0.183	0	0.585	0.974
KIF20A	CCNB2	9606.ENSP00000378356	9606.ENSP00000288207	0	0	0	0	0.952	0.139	0	0.624	0.983
KIF20A	MELK	9606.ENSP00000378356	9606.ENSP00000298048	0	0	0	0	0.909	0	0	0.427	0.945
KIF20A	KIAA0101	9606.ENSP00000378356	9606.ENSP00000300035	0	0	0	0	0.919	0	0	0.391	0.949
KIF20A	TPX2	9606.ENSP00000378356	9606.ENSP00000300403	0	0	0	0	0.958	0.27	0	0.56	0.985
KIF20A	BIRC5	9606.ENSP00000378356	9606.ENSP00000301633	0	0	0	0	0.88	0.057	0.9	0.449	0.992
KIF20A	BUB1	9606.ENSP00000378356	9606.ENSP00000302530	0	0	0	0	0.975	0.378	0	0.547	0.992
KIF20A	SHCBP1	9606.ENSP00000378356	9606.ENSP00000306473	0	0	0	0	0.916	0.152	0	0.204	0.939
KIF20A	AURKB	9606.ENSP00000378356	9606.ENSP00000313950	0	0	0	0	0.932	0.711	0.9	0.955	0.999
KIF20A	KIF15	9606.ENSP00000378356	9606.ENSP00000324020	0	0	0	0.578	0.914	0	0.5	0.521	0.964
KIF20A	FOXM1	9606.ENSP00000378356	9606.ENSP00000342307	0	0	0	0	0.845	0.058	0	0.519	0.923
KIF20A	UBE2C	9606.ENSP00000378356	9606.ENSP00000348838	0	0	0	0	0.937	0.077	0	0.498	0.968
KIF20A	RRM2	9606.ENSP00000378356	9606.ENSP00000353770	0	0	0	0	0.928	0	0	0.398	0.955
KIF20A	ARHGAP11A	9606.ENSP00000378356	9606.ENSP00000355090	0	0	0	0	0.91	0.078	0	0.043	0.913
KIF20A	CENPF	9606.ENSP00000378356	9606.ENSP00000355922	0	0	0	0	0.926	0	0	0.522	0.963
KIF20A	NEK2	9606.ENSP00000378356	9606.ENSP00000355966	0	0	0	0	0.923	0.058	0	0.478	0.959
KIF20A	MKI67	9606.ENSP00000378356	9606.ENSP00000357643	0	0	0	0	0.913	0.4	0	0.278	0.959
KIF20A	KIF2C	9606.ENSP00000378356	9606.ENSP00000361298	0	0	0	0.578	0.915	0	0.5	0.661	0.968
KIF20A	CDC20	9606.ENSP00000378356	9606.ENSP00000361540	0	0	0	0	0.955	0.102	0	0.576	0.981
KIF20A	CDCA8	9606.ENSP00000378356	9606.ENSP00000362146	0	0	0	0	0.919	0.458	0.9	0.632	0.998
KIF20A	KIF4A	9606.ENSP00000378356	9606.ENSP00000363524	0	0	0	0.579	0.931	0.066	0.5	0.848	0.977
KIF20A	ECT2	9606.ENSP00000378356	9606.ENSP00000376457	0	0	0	0	0.862	0.118	0	0.651	0.953
KIF20A	PTTG1	9606.ENSP00000378356	9606.ENSP00000377536	0	0	0	0	0.916	0	0	0.437	0.951
KIF20A	PRC1	9606.ENSP00000378356	9606.ENSP00000377793	0	0	0	0	0.892	0.4	0.9	0.455	0.996
KIF20A	KIF18B	9606.ENSP00000378356	9606.ENSP00000465992	0	0	0	0.581	0.831	0	0.5	0.601	0.933
KIF20A	HJURP	9606.ENSP00000378356	9606.ENSP00000414109	0	0	0	0	0.917	0	0	0.299	0.939
KIF20A	KIFC1	9606.ENSP00000378356	9606.ENSP00000393963	0	0	0	0.587	0.809	0.243	0.5	0.745	0.945
KIF20A	PBK	9606.ENSP00000378356	9606.ENSP00000428489	0	0	0	0	0.935	0.104	0	0.455	0.966
KIF20A	NUSAP1	9606.ENSP00000378356	9606.ENSP00000453403	0	0	0	0	0.938	0.27	0	0.527	0.977
KIF20A	CDK1	9606.ENSP00000378356	9606.ENSP00000378699	0	0	0	0	0.964	0.152	0	0.583	0.986
KIF20A	TOP2A	9606.ENSP00000378356	9606.ENSP00000411532	0	0	0	0	0.972	0.27	0	0.541	0.99
KIF2C	AURKA	9606.ENSP00000361298	9606.ENSP00000216911	0	0	0	0	0.865	0.349	0	0.636	0.965
KIF2C	NCAPG	9606.ENSP00000361298	9606.ENSP00000251496	0	0	0	0	0.883	0.077	0	0.467	0.937
KIF2C	CCNB1	9606.ENSP00000361298	9606.ENSP00000256442	0	0	0	0	0.929	0.139	0	0.543	0.969
KIF2C	TROAP	9606.ENSP00000361298	9606.ENSP00000257909	0	0	0	0	0.926	0	0	0.258	0.943
KIF2C	KIF11	9606.ENSP00000361298	9606.ENSP00000260731	0	0	0	0.638	0.921	0	0.5	0.838	0.971
KIF2C	NDC80	9606.ENSP00000361298	9606.ENSP00000261597	0	0	0	0	0.917	0.181	0	0.7	0.977
KIF2C	NUF2	9606.ENSP00000361298	9606.ENSP00000271452	0	0	0	0	0.755	0.138	0	0.614	0.911
KIF2C	CCNA2	9606.ENSP00000361298	9606.ENSP00000274026	0	0	0	0	0.932	0.139	0	0.468	0.966
KIF2C	BUB1B	9606.ENSP00000361298	9606.ENSP00000287598	0	0	0	0	0.923	0.183	0	0.689	0.978
KIF2C	CCNB2	9606.ENSP00000361298	9606.ENSP00000288207	0	0	0	0	0.913	0.139	0	0.581	0.966
KIF2C	MELK	9606.ENSP00000361298	9606.ENSP00000298048	0	0	0	0	0.847	0	0	0.458	0.913
KIF2C	TPX2	9606.ENSP00000361298	9606.ENSP00000300403	0	0	0	0	0.941	0	0	0.688	0.981
KIF2C	BIRC5	9606.ENSP00000361298	9606.ENSP00000301633	0	0	0	0	0.874	0.057	0.9	0.536	0.993
KIF2C	BUB1	9606.ENSP00000361298	9606.ENSP00000302530	0	0	0	0	0.944	0.183	0	0.786	0.989
KIF2C	AURKB	9606.ENSP00000361298	9606.ENSP00000313950	0	0	0	0	0.911	0.146	0.9	0.922	0.999
KIF2C	KIF15	9606.ENSP00000361298	9606.ENSP00000324020	0	0	0	0.606	0.893	0	0.5	0.68	0.959
KIF2C	FOXM1	9606.ENSP00000361298	9606.ENSP00000342307	0	0	0	0	0.898	0.058	0	0.39	0.936
KIF2C	UBE2C	9606.ENSP00000361298	9606.ENSP00000348838	0	0	0	0	0.919	0.077	0	0.504	0.96
KIF2C	SGOL2	9606.ENSP00000361298	9606.ENSP00000350447	0	0	0	0	0.324	0.27	0	0.952	0.974
KIF2C	RRM2	9606.ENSP00000361298	9606.ENSP00000353770	0	0	0	0	0.915	0	0	0.395	0.946
KIF2C	CENPF	9606.ENSP00000361298	9606.ENSP00000355922	0	0	0	0	0.885	0	0	0.633	0.956
KIF2C	NEK2	9606.ENSP00000361298	9606.ENSP00000355966	0	0	0	0	0.895	0.058	0	0.519	0.948
KIF2C	MKI67	9606.ENSP00000361298	9606.ENSP00000357643	0	0	0	0	0.902	0.102	0	0.284	0.932
KIF2C	PRC1	9606.ENSP00000361298	9606.ENSP00000377793	0	0	0	0	0.838	0.213	0	0.365	0.912
KIF2C	GTSE1	9606.ENSP00000361298	9606.ENSP00000415430	0	0	0	0	0.806	0	0	0.624	0.924
KIF2C	HJURP	9606.ENSP00000361298	9606.ENSP00000414109	0	0	0	0	0.89	0	0	0.358	0.926
KIF2C	PTTG1	9606.ENSP00000361298	9606.ENSP00000377536	0	0	0	0	0.87	0	0	0.474	0.929
KIF2C	PBK	9606.ENSP00000361298	9606.ENSP00000428489	0	0	0	0	0.913	0.104	0	0.359	0.945
KIF2C	NUSAP1	9606.ENSP00000361298	9606.ENSP00000453403	0	0	0	0	0.907	0	0	0.466	0.948
KIF2C	KIF18B	9606.ENSP00000361298	9606.ENSP00000465992	0	0	0	0.662	0.827	0.204	0.5	0.954	0.949
KIF2C	KIF4A	9606.ENSP00000361298	9606.ENSP00000363524	0	0	0	0.666	0.891	0.056	0.5	0.789	0.958
KIF2C	CDK1	9606.ENSP00000361298	9606.ENSP00000378699	0	0	0	0	0.902	0.152	0	0.604	0.964
KIF2C	KIFC1	9606.ENSP00000361298	9606.ENSP00000393963	0	0	0	0.601	0.908	0	0.5	0.783	0.967
KIF2C	KIF20A	9606.ENSP00000361298	9606.ENSP00000378356	0	0	0	0.578	0.915	0	0.5	0.661	0.968
KIF2C	TOP2A	9606.ENSP00000361298	9606.ENSP00000411532	0	0	0	0	0.941	0	0	0.478	0.968
KIF2C	CDC20	9606.ENSP00000361298	9606.ENSP00000361540	0	0	0	0	0.957	0.102	0	0.623	0.984
KIF2C	CDCA8	9606.ENSP00000361298	9606.ENSP00000362146	0	0	0	0	0.933	0.128	0.9	0.667	0.997
KIF4A	AURKA	9606.ENSP00000363524	9606.ENSP00000216911	0	0	0	0	0.919	0.146	0	0.603	0.97
KIF4A	NCAPH	9606.ENSP00000363524	9606.ENSP00000240423	0	0	0	0	0.879	0.15	0	0.432	0.936
KIF4A	NCAPG	9606.ENSP00000363524	9606.ENSP00000251496	0	0	0	0	0.887	0.077	0	0.525	0.946
KIF4A	CCNB1	9606.ENSP00000363524	9606.ENSP00000256442	0	0	0	0	0.888	0.139	0	0.586	0.957
KIF4A	KIF11	9606.ENSP00000363524	9606.ENSP00000260731	0	0	0	0.649	0.959	0	0.5	0.826	0.984
KIF4A	NDC80	9606.ENSP00000363524	9606.ENSP00000261597	0	0	0	0	0.888	0.181	0	0.388	0.939
KIF4A	CCNA2	9606.ENSP00000363524	9606.ENSP00000274026	0	0	0	0	0.921	0.139	0	0.382	0.954
KIF4A	BUB1B	9606.ENSP00000363524	9606.ENSP00000287598	0	0	0	0	0.94	0.183	0	0.546	0.975
KIF4A	CCNB2	9606.ENSP00000363524	9606.ENSP00000288207	0	0	0	0	0.922	0.139	0	0.534	0.966
KIF4A	MELK	9606.ENSP00000363524	9606.ENSP00000298048	0	0	0	0	0.926	0	0	0.414	0.955
KIF4A	TPX2	9606.ENSP00000363524	9606.ENSP00000300403	0	0	0	0	0.962	0	0	0.566	0.983
KIF4A	BIRC5	9606.ENSP00000363524	9606.ENSP00000301633	0	0	0	0	0.911	0.057	0	0.581	0.962
KIF4A	BUB1	9606.ENSP00000363524	9606.ENSP00000302530	0	0	0	0	0.959	0.183	0	0.721	0.99
KIF4A	AURKB	9606.ENSP00000363524	9606.ENSP00000313950	0	0	0	0	0.89	0.146	0	0.71	0.97
KIF4A	KIF15	9606.ENSP00000363524	9606.ENSP00000324020	0	0	0	0.633	0.864	0	0.5	0.758	0.948
KIF4A	UBE2C	9606.ENSP00000363524	9606.ENSP00000348838	0	0	0	0	0.903	0.077	0	0.453	0.947
KIF4A	CENPF	9606.ENSP00000363524	9606.ENSP00000355922	0	0	0	0	0.842	0	0	0.5	0.917
KIF4A	NEK2	9606.ENSP00000363524	9606.ENSP00000355966	0	0	0	0	0.897	0.058	0	0.394	0.936
KIF4A	MKI67	9606.ENSP00000363524	9606.ENSP00000357643	0	0	0	0	0.865	0.102	0	0.254	0.902
KIF4A	KIF2C	9606.ENSP00000363524	9606.ENSP00000361298	0	0	0	0.666	0.891	0.056	0.5	0.789	0.958
KIF4A	CDC20	9606.ENSP00000363524	9606.ENSP00000361540	0	0	0	0	0.944	0.102	0	0.462	0.97
KIF4A	CDCA8	9606.ENSP00000363524	9606.ENSP00000362146	0	0	0	0	0.889	0	0	0.531	0.946
KIF4A	PTTG1	9606.ENSP00000363524	9606.ENSP00000377536	0	0	0	0	0.789	0	0	0.55	0.901
KIF4A	ECT2	9606.ENSP00000363524	9606.ENSP00000376457	0	0	0	0	0.781	0.059	0	0.576	0.905
KIF4A	NUSAP1	9606.ENSP00000363524	9606.ENSP00000453403	0	0	0	0	0.859	0	0	0.517	0.929
KIF4A	PBK	9606.ENSP00000363524	9606.ENSP00000428489	0	0	0	0	0.896	0.104	0	0.378	0.937
KIF4A	KIF20A	9606.ENSP00000363524	9606.ENSP00000378356	0	0	0	0.579	0.931	0.066	0.5	0.848	0.977
KIF4A	CDK1	9606.ENSP00000363524	9606.ENSP00000378699	0	0	0	0	0.942	0.152	0	0.668	0.982
KIF4A	TOP2A	9606.ENSP00000363524	9606.ENSP00000411532	0	0	0	0	0.971	0	0	0.721	0.991
KIF4A	PRC1	9606.ENSP00000363524	9606.ENSP00000377793	0	0	0	0	0.945	0.733	0	0.841	0.997
KIFC1	KIF11	9606.ENSP00000393963	9606.ENSP00000260731	0	0	0	0.645	0.699	0.787	0.5	0.873	0.975
KIFC1	CCNA2	9606.ENSP00000393963	9606.ENSP00000274026	0	0	0	0	0.849	0.139	0	0.335	0.906
KIFC1	BUB1B	9606.ENSP00000393963	9606.ENSP00000287598	0	0	0	0	0.774	0.254	0	0.497	0.908
KIFC1	CCNB2	9606.ENSP00000393963	9606.ENSP00000288207	0	0	0	0	0.885	0.18	0	0.481	0.946
KIFC1	BUB1	9606.ENSP00000393963	9606.ENSP00000302530	0	0	0	0	0.893	0.254	0	0.539	0.96
KIFC1	AURKB	9606.ENSP00000393963	9606.ENSP00000313950	0	0	0	0	0.885	0.146	0	0.59	0.956
KIFC1	UBE2C	9606.ENSP00000393963	9606.ENSP00000348838	0	0	0	0	0.896	0.077	0	0.325	0.93
KIFC1	KIF2C	9606.ENSP00000393963	9606.ENSP00000361298	0	0	0	0.601	0.908	0	0.5	0.783	0.967
KIFC1	CDC20	9606.ENSP00000393963	9606.ENSP00000361540	0	0	0	0	0.918	0.102	0	0.476	0.958
KIFC1	CDCA8	9606.ENSP00000393963	9606.ENSP00000362146	0	0	0	0	0.904	0	0	0.458	0.946
KIFC1	PRC1	9606.ENSP00000393963	9606.ENSP00000377793	0	0	0	0	0.739	0.213	0	0.614	0.914
KIFC1	KIF20A	9606.ENSP00000393963	9606.ENSP00000378356	0	0	0	0.587	0.809	0.243	0.5	0.745	0.945
KIFC1	CDK1	9606.ENSP00000393963	9606.ENSP00000378699	0	0	0	0	0.805	0.152	0	0.484	0.907
KIFC1	TOP2A	9606.ENSP00000393963	9606.ENSP00000411532	0	0	0	0	0.867	0	0	0.32	0.906
KIFC1	KIF18B	9606.ENSP00000393963	9606.ENSP00000465992	0	0	0	0.624	0.818	0.345	0.5	0.663	0.951
LAMA2	ITGA3	9606.ENSP00000400365	9606.ENSP00000007722	0	0	0	0	0.062	0.211	0.9	0.375	0.947
LAMA2	LAMB1	9606.ENSP00000400365	9606.ENSP00000222399	0	0	0	0.63	0.176	0.23	0.9	0.766	0.95
LAMA2	LAMC1	9606.ENSP00000400365	9606.ENSP00000258341	0	0	0	0.717	0.106	0.145	0.9	0.757	0.934
LAMA2	ITGA2	9606.ENSP00000400365	9606.ENSP00000296585	0	0	0	0	0.062	0.212	0.9	0.273	0.939
LAMA2	MET	9606.ENSP00000400365	9606.ENSP00000317272	0	0	0	0	0	0.078	0.9	0.085	0.908
LAMB1	ITGA3	9606.ENSP00000222399	9606.ENSP00000007722	0	0	0	0	0.158	0.177	0.9	0.418	0.954
LAMB1	MET	9606.ENSP00000222399	9606.ENSP00000317272	0	0	0	0	0.139	0	0.9	0	0.91
LAMB1	MMP14	9606.ENSP00000222399	9606.ENSP00000308208	0	0	0	0	0.162	0	0.9	0.181	0.925
LAMB1	EGFR	9606.ENSP00000222399	9606.ENSP00000275493	0	0	0	0	0.255	0	0.9	0.17	0.932
LAMB1	ITGA2	9606.ENSP00000222399	9606.ENSP00000296585	0	0	0	0	0.118	0.103	0.9	0.379	0.944
LAMB1	LAMA2	9606.ENSP00000222399	9606.ENSP00000400365	0	0	0	0.63	0.176	0.23	0.9	0.766	0.95
LAMB1	LAMC1	9606.ENSP00000222399	9606.ENSP00000258341	0	0	0	0.681	0.744	0.971	0.9	0.892	0.999
LAMC1	ITGA3	9606.ENSP00000258341	9606.ENSP00000007722	0	0	0	0	0.117	0.153	0.9	0.514	0.958
LAMC1	NID2	9606.ENSP00000258341	9606.ENSP00000216286	0	0	0	0	0.174	0.521	0.6	0.836	0.97
LAMC1	LAMB1	9606.ENSP00000258341	9606.ENSP00000222399	0	0	0	0.681	0.744	0.971	0.9	0.892	0.999
LAMC1	MET	9606.ENSP00000258341	9606.ENSP00000317272	0	0	0	0	0.128	0.078	0.9	0.046	0.913
LAMC1	MMP14	9606.ENSP00000258341	9606.ENSP00000308208	0	0	0	0	0.182	0	0.9	0.206	0.929
LAMC1	LAMA2	9606.ENSP00000258341	9606.ENSP00000400365	0	0	0	0.717	0.106	0.145	0.9	0.757	0.934
LAMC1	ITGA2	9606.ENSP00000258341	9606.ENSP00000296585	0	0	0	0	0.103	0.153	0.9	0.299	0.939
LIF	TIMP1	9606.ENSP00000249075	9606.ENSP00000218388	0	0	0	0	0.098	0	0.9	0.335	0.934
LIF	CCL2	9606.ENSP00000249075	9606.ENSP00000225831	0	0	0	0	0.098	0	0.9	0.506	0.951
LIF	SAA1	9606.ENSP00000249075	9606.ENSP00000384906	0	0	0	0	0.065	0	0.9	0.067	0.905
LIF	MMP9	9606.ENSP00000249075	9606.ENSP00000361405	0	0	0	0	0.062	0	0.9	0.338	0.932
LIF	CXCL10	9606.ENSP00000249075	9606.ENSP00000305651	0	0	0	0	0.062	0	0.9	0.417	0.94
LIF	CCL5	9606.ENSP00000249075	9606.ENSP00000474412	0	0	0	0	0	0	0.9	0.457	0.943
LIF	CXCL1	9606.ENSP00000249075	9606.ENSP00000379110	0	0	0	0	0.161	0	0.9	0.411	0.946
LIF	CXCL8	9606.ENSP00000249075	9606.ENSP00000306512	0	0	0	0	0.172	0	0.9	0.517	0.956
LIF	VEGFA	9606.ENSP00000249075	9606.ENSP00000478570	0	0	0	0	0.093	0	0.9	0.598	0.96
LMNB1	CCNB1	9606.ENSP00000261366	9606.ENSP00000256442	0	0	0	0	0.463	0	0.9	0.452	0.968
LMNB1	TOP2A	9606.ENSP00000261366	9606.ENSP00000411532	0	0	0	0	0.906	0.128	0	0.267	0.934
LMNB1	CDK1	9606.ENSP00000261366	9606.ENSP00000378699	0	0	0	0	0.618	0.463	0.9	0.572	0.99
LOXL2	PCOLCE	9606.ENSP00000373783	9606.ENSP00000223061	0	0	0	0	0.171	0	0.9	0.202	0.928
LOXL2	FBLN5	9606.ENSP00000373783	9606.ENSP00000345008	0	0	0	0	0.085	0.057	0.9	0.564	0.957
LTBP1	THBS1	9606.ENSP00000386043	9606.ENSP00000260356	0	0	0	0	0.107	0.079	0.8	0.724	0.948
LTBP1	FN1	9606.ENSP00000386043	9606.ENSP00000346839	0	0	0	0	0.202	0.213	0	0.973	0.982
LUM	COL1A1	9606.ENSP00000266718	9606.ENSP00000225964	0	0	0	0	0.764	0.379	0.72	0.58	0.98
LUM	OGN	9606.ENSP00000266718	9606.ENSP00000262551	0	0	0	0.656	0.233	0	0.9	0.853	0.943
LUM	COL5A1	9606.ENSP00000266718	9606.ENSP00000360882	0	0	0	0	0.381	0.189	0.72	0.522	0.923
LUM	B3GNT7	9606.ENSP00000266718	9606.ENSP00000287590	0	0	0	0	0.053	0.056	0.9	0.373	0.936
LUM	FMOD	9606.ENSP00000266718	9606.ENSP00000347041	0	0	0.447	0.928	0.353	0	0.9	0.919	0.938
LUM	COL5A2	9606.ENSP00000266718	9606.ENSP00000364000	0	0	0	0	0.61	0.189	0.72	0.42	0.941
LUM	COL3A1	9606.ENSP00000266718	9606.ENSP00000304408	0	0	0	0	0.831	0.189	0.72	0.607	0.982
LUM	COL1A2	9606.ENSP00000266718	9606.ENSP00000297268	0	0	0	0	0.875	0.472	0.9	0.559	0.996
MAG	MBP	9606.ENSP00000376048	9606.ENSP00000380958	0	0	0	0	0.325	0.213	0	0.898	0.941
MBP	MAG	9606.ENSP00000380958	9606.ENSP00000376048	0	0	0	0	0.325	0.213	0	0.898	0.941
MELK	AURKA	9606.ENSP00000298048	9606.ENSP00000216911	0	0	0	0.738	0.917	0	0	0.571	0.929
MELK	OIP5	9606.ENSP00000298048	9606.ENSP00000220514	0	0	0	0	0.894	0	0	0.25	0.917
MELK	NCAPG	9606.ENSP00000298048	9606.ENSP00000251496	0	0	0	0	0.925	0	0	0.557	0.965
MELK	CCNB1	9606.ENSP00000298048	9606.ENSP00000256442	0	0	0	0	0.921	0.183	0	0.471	0.963
MELK	KIF11	9606.ENSP00000298048	9606.ENSP00000260731	0	0	0	0	0.907	0	0	0.385	0.94
MELK	NDC80	9606.ENSP00000298048	9606.ENSP00000261597	0	0	0	0	0.933	0	0	0.141	0.94
MELK	NUF2	9606.ENSP00000298048	9606.ENSP00000271452	0	0	0	0	0.87	0.069	0	0.381	0.918
MELK	CCNA2	9606.ENSP00000298048	9606.ENSP00000274026	0	0	0	0	0.93	0.155	0	0.393	0.961
MELK	BUB1B	9606.ENSP00000298048	9606.ENSP00000287598	0	0	0	0	0.907	0.057	0	0.527	0.955
MELK	CCNB2	9606.ENSP00000298048	9606.ENSP00000288207	0	0	0	0	0.918	0.183	0	0.523	0.965
MELK	PTTG1	9606.ENSP00000298048	9606.ENSP00000377536	0	0	0	0	0.857	0	0	0.345	0.902
MELK	MKI67	9606.ENSP00000298048	9606.ENSP00000357643	0	0	0	0	0.812	0.27	0	0.391	0.909
MELK	HJURP	9606.ENSP00000298048	9606.ENSP00000414109	0	0	0	0	0.842	0	0	0.456	0.91
MELK	KIF2C	9606.ENSP00000298048	9606.ENSP00000361298	0	0	0	0	0.847	0	0	0.458	0.913
MELK	KIAA0101	9606.ENSP00000298048	9606.ENSP00000300035	0	0	0	0	0.868	0	0	0.391	0.916
MELK	CDKN3	9606.ENSP00000298048	9606.ENSP00000335357	0	0	0	0	0.899	0.143	0	0.117	0.917
MELK	CDC45	9606.ENSP00000298048	9606.ENSP00000405726	0	0	0	0	0.885	0	0	0.324	0.919
MELK	CENPF	9606.ENSP00000298048	9606.ENSP00000355922	0	0	0	0	0.874	0	0	0.508	0.935
MELK	NUSAP1	9606.ENSP00000298048	9606.ENSP00000453403	0	0	0	0	0.872	0	0	0.519	0.936
MELK	ECT2	9606.ENSP00000298048	9606.ENSP00000376457	0	0	0	0	0.92	0.078	0	0.271	0.942
MELK	KIF20A	9606.ENSP00000298048	9606.ENSP00000378356	0	0	0	0	0.909	0	0	0.427	0.945
MELK	BIRC5	9606.ENSP00000298048	9606.ENSP00000301633	0	0	0	0	0.896	0.143	0	0.454	0.947
MELK	UBE2C	9606.ENSP00000298048	9606.ENSP00000348838	0	0	0	0	0.891	0.135	0	0.502	0.949
MELK	CDCA8	9606.ENSP00000298048	9606.ENSP00000362146	0	0	0	0	0.911	0	0	0.459	0.95
MELK	KIF4A	9606.ENSP00000298048	9606.ENSP00000363524	0	0	0	0	0.926	0	0	0.414	0.955
MELK	RRM2	9606.ENSP00000298048	9606.ENSP00000353770	0	0	0	0	0.925	0.059	0	0.427	0.956
MELK	TOP2A	9606.ENSP00000298048	9606.ENSP00000411532	0	0	0	0	0.935	0.056	0	0.56	0.97
MELK	TPX2	9606.ENSP00000298048	9606.ENSP00000300403	0	0	0	0	0.943	0	0	0.508	0.97
MELK	BUB1	9606.ENSP00000298048	9606.ENSP00000302530	0	0	0	0	0.951	0.057	0	0.601	0.98
MELK	PBK	9606.ENSP00000298048	9606.ENSP00000428489	0	0	0	0	0.952	0.136	0	0.56	0.98
MELK	CDC20	9606.ENSP00000298048	9606.ENSP00000361540	0	0	0	0	0.963	0.065	0	0.466	0.98
MELK	CDK1	9606.ENSP00000298048	9606.ENSP00000378699	0	0	0	0.711	0.982	0.078	0	0.5	0.985
MELK	FOXM1	9606.ENSP00000298048	9606.ENSP00000342307	0	0	0	0	0.816	0.077	0	0.962	0.993
MET	ITGA3	9606.ENSP00000317272	9606.ENSP00000007722	0	0	0	0	0.171	0.114	0.9	0.445	0.953
MET	LAMB1	9606.ENSP00000317272	9606.ENSP00000222399	0	0	0	0	0.139	0	0.9	0	0.91
MET	LAMC1	9606.ENSP00000317272	9606.ENSP00000258341	0	0	0	0	0.128	0.078	0.9	0.046	0.913
MET	EGFR	9606.ENSP00000317272	9606.ENSP00000275493	0	0	0	0.58	0.23	0.887	0	0.988	0.946
MET	ITGA2	9606.ENSP00000317272	9606.ENSP00000296585	0	0	0	0	0.154	0.114	0.9	0.208	0.932
MET	VEGFA	9606.ENSP00000317272	9606.ENSP00000478570	0	0	0	0	0.067	0	0.6	0.769	0.906
MET	LAMA2	9606.ENSP00000317272	9606.ENSP00000400365	0	0	0	0	0	0.078	0.9	0.085	0.908
MET	SDC1	9606.ENSP00000317272	9606.ENSP00000370542	0	0	0	0	0.138	0	0.9	0.386	0.942
MET	PLAUR	9606.ENSP00000317272	9606.ENSP00000339328	0	0	0	0	0.062	0	0.9	0.459	0.944
MET	S100A8	9606.ENSP00000317272	9606.ENSP00000357722	0	0	0	0	0	0	0	0.987	0.987
MET	CD44	9606.ENSP00000317272	9606.ENSP00000398632	0	0	0	0	0.075	0.483	0	0.987	0.993
MKI67	AURKA	9606.ENSP00000357643	9606.ENSP00000216911	0	0	0	0	0.779	0	0	0.578	0.903
MKI67	NCAPG	9606.ENSP00000357643	9606.ENSP00000251496	0	0	0	0	0.889	0	0	0.247	0.913
MKI67	CCNB1	9606.ENSP00000357643	9606.ENSP00000256442	0	0	0	0	0.791	0	0	0.635	0.92
MKI67	KIF11	9606.ENSP00000357643	9606.ENSP00000260731	0	0	0	0	0.959	0.102	0	0.388	0.975
MKI67	NDC80	9606.ENSP00000357643	9606.ENSP00000261597	0	0	0	0	0.88	0	0	0.26	0.908
MKI67	CCNA2	9606.ENSP00000357643	9606.ENSP00000274026	0	0	0	0	0.92	0	0	0.484	0.957
MKI67	BUB1B	9606.ENSP00000357643	9606.ENSP00000287598	0	0	0	0	0.919	0.27	0	0.366	0.959
MKI67	CCNB2	9606.ENSP00000357643	9606.ENSP00000288207	0	0	0	0	0.857	0	0	0.493	0.924
MKI67	MELK	9606.ENSP00000357643	9606.ENSP00000298048	0	0	0	0	0.812	0.27	0	0.391	0.909
MKI67	TPX2	9606.ENSP00000357643	9606.ENSP00000300403	0	0	0	0	0.847	0.27	0	0.4	0.927
MKI67	BIRC5	9606.ENSP00000357643	9606.ENSP00000301633	0	0	0	0	0.839	0	0	0.612	0.935
MKI67	BUB1	9606.ENSP00000357643	9606.ENSP00000302530	0	0	0	0	0.952	0	0	0.497	0.975
MKI67	AURKB	9606.ENSP00000357643	9606.ENSP00000313950	0	0	0	0	0.804	0.27	0	0.481	0.919
MKI67	KIF15	9606.ENSP00000357643	9606.ENSP00000324020	0	0	0	0	0.909	0.316	0	0.713	0.98
MKI67	FOXM1	9606.ENSP00000357643	9606.ENSP00000342307	0	0	0	0	0.945	0	0	0.497	0.971
MKI67	UBE2C	9606.ENSP00000357643	9606.ENSP00000348838	0	0	0	0	0.848	0	0	0.549	0.928
MKI67	SMC4	9606.ENSP00000357643	9606.ENSP00000349961	0	0	0	0	0.914	0.153	0	0.218	0.938
MKI67	RRM2	9606.ENSP00000357643	9606.ENSP00000353770	0	0	0	0	0.923	0	0	0.596	0.967
MKI67	ARHGAP11A	9606.ENSP00000357643	9606.ENSP00000355090	0	0	0	0	0.896	0	0	0.195	0.912
MKI67	CENPF	9606.ENSP00000357643	9606.ENSP00000355922	0	0	0	0	0.936	0.27	0	0.519	0.975
MKI67	KIF4A	9606.ENSP00000357643	9606.ENSP00000363524	0	0	0	0	0.865	0.102	0	0.254	0.902
MKI67	KIF18B	9606.ENSP00000357643	9606.ENSP00000465992	0	0	0	0	0.883	0.359	0	0.043	0.922
MKI67	KIF2C	9606.ENSP00000357643	9606.ENSP00000361298	0	0	0	0	0.902	0.102	0	0.284	0.932
MKI67	HJURP	9606.ENSP00000357643	9606.ENSP00000414109	0	0	0	0	0.918	0	0	0.211	0.933
MKI67	CDCA8	9606.ENSP00000357643	9606.ENSP00000362146	0	0	0	0	0.92	0	0	0.355	0.946
MKI67	KIF20A	9606.ENSP00000357643	9606.ENSP00000378356	0	0	0	0	0.913	0.4	0	0.278	0.959
MKI67	CDK1	9606.ENSP00000357643	9606.ENSP00000378699	0	0	0	0	0.843	0.27	0	0.672	0.959
MKI67	CDC20	9606.ENSP00000357643	9606.ENSP00000361540	0	0	0	0	0.94	0	0	0.559	0.972
MKI67	NUSAP1	9606.ENSP00000357643	9606.ENSP00000453403	0	0	0	0	0.964	0	0	0.469	0.98
MKI67	TOP2A	9606.ENSP00000357643	9606.ENSP00000411532	0	0	0	0	0.966	0	0	0.66	0.988
MMP14	TIMP1	9606.ENSP00000308208	9606.ENSP00000218388	0	0	0	0	0.159	0.977	0	0.986	0.999
MMP14	LAMB1	9606.ENSP00000308208	9606.ENSP00000222399	0	0	0	0	0.162	0	0.9	0.181	0.925
MMP14	LAMC1	9606.ENSP00000308208	9606.ENSP00000258341	0	0	0	0	0.182	0	0.9	0.206	0.929
MMP14	CAV1	9606.ENSP00000308208	9606.ENSP00000339191	0	0	0	0	0.214	0.27	0	0.921	0.951
MMP14	HSPG2	9606.ENSP00000308208	9606.ENSP00000363827	0	0	0	0	0.231	0	0.9	0.436	0.952
MMP14	CD44	9606.ENSP00000308208	9606.ENSP00000398632	0	0	0	0	0.111	0	0	0.988	0.989
MMP9	TIMP1	9606.ENSP00000361405	9606.ENSP00000218388	0	0	0	0	0.063	0.522	0.8	0.99	0.999
MMP9	LIF	9606.ENSP00000361405	9606.ENSP00000249075	0	0	0	0	0.062	0	0.9	0.338	0.932
MMP9	THBS1	9606.ENSP00000361405	9606.ENSP00000260356	0	0	0	0	0.063	0.462	0.8	0.691	0.964
MMP9	COL14A1	9606.ENSP00000361405	9606.ENSP00000297848	0	0	0	0	0.062	0.203	0.9	0.229	0.934
MMP9	SAA1	9606.ENSP00000361405	9606.ENSP00000384906	0	0	0	0	0.062	0	0.9	0.418	0.94
MMP9	SDC1	9606.ENSP00000361405	9606.ENSP00000370542	0	0	0	0	0	0	0.9	0.851	0.984
MMP9	VEGFA	9606.ENSP00000361405	9606.ENSP00000478570	0	0	0	0	0	0	0.9	0.879	0.987
MMP9	CD44	9606.ENSP00000361405	9606.ENSP00000398632	0	0	0	0	0	0.213	0.6	0.989	0.996
MSN	ICAM1	9606.ENSP00000353408	9606.ENSP00000264832	0	0	0	0	0.096	0.354	0.8	0.614	0.949
MSN	VCAM1	9606.ENSP00000353408	9606.ENSP00000294728	0	0	0	0	0.062	0.566	0.8	0.481	0.952
MSN	CD44	9606.ENSP00000353408	9606.ENSP00000398632	0	0	0	0	0.184	0.563	0	0.988	0.995
MX1	OAS3	9606.ENSP00000381601	9606.ENSP00000228928	0	0	0	0	0.793	0	0.9	0.732	0.993
MX1	EGR1	9606.ENSP00000381601	9606.ENSP00000239938	0	0	0	0	0.063	0.056	0.9	0.233	0.923
MX1	IRF1	9606.ENSP00000381601	9606.ENSP00000245414	0	0	0	0	0.177	0	0.9	0.745	0.977
MX1	OAS2	9606.ENSP00000381601	9606.ENSP00000342278	0	0	0	0	0.787	0	0.9	0.796	0.995
MX1	IFI6	9606.ENSP00000381601	9606.ENSP00000342513	0	0	0	0	0.847	0	0.9	0.69	0.994
MX1	STAT1	9606.ENSP00000381601	9606.ENSP00000354394	0	0	0	0	0.791	0	0.5	0.811	0.978
MX1	GBP2	9606.ENSP00000381601	9606.ENSP00000359497	0	0	0	0	0.247	0	0.9	0.528	0.961
MX1	ISG15	9606.ENSP00000381601	9606.ENSP00000368699	0	0	0	0	0.882	0.149	0.6	0.88	0.994
MX1	RSAD2	9606.ENSP00000381601	9606.ENSP00000371471	0	0	0	0	0.871	0	0.9	0.831	0.997
MX1	OAS1	9606.ENSP00000381601	9606.ENSP00000388001	0	0	0	0	0.879	0	0.9	0.857	0.998
MYBL2	CCNA2	9606.ENSP00000217026	9606.ENSP00000274026	0	0	0	0	0.59	0.307	0.8	0.653	0.977
MYBL2	CCNB2	9606.ENSP00000217026	9606.ENSP00000288207	0	0	0	0	0.603	0.156	0.9	0.479	0.98
MYBL2	CDK2	9606.ENSP00000217026	9606.ENSP00000266970	0	0	0	0	0.36	0.762	0.8	0.533	0.983
MYBL2	CCNB1	9606.ENSP00000217026	9606.ENSP00000256442	0	0	0	0	0.575	0.156	0.9	0.624	0.984
MYBL2	FOXM1	9606.ENSP00000217026	9606.ENSP00000342307	0	0	0	0	0.629	0.154	0.8	0.955	0.996
MYOF	VEGFA	9606.ENSP00000352208	9606.ENSP00000478570	0	0	0	0	0.076	0	0.9	0.15	0.914
NAMPT	NNMT	9606.ENSP00000222553	9606.ENSP00000441434	0	0	0	0	0	0	0.9	0.527	0.95
NCAPG	AURKA	9606.ENSP00000251496	9606.ENSP00000216911	0	0	0	0	0.899	0.103	0	0.524	0.953
NCAPG	OIP5	9606.ENSP00000251496	9606.ENSP00000220514	0	0	0	0	0.898	0	0	0.293	0.924
NCAPG	NCAPH	9606.ENSP00000251496	9606.ENSP00000240423	0	0	0	0	0.994	0.993	0.9	0.955	0.999
NCAPG	ECT2	9606.ENSP00000251496	9606.ENSP00000376457	0	0	0	0	0.881	0	0	0.302	0.913
NCAPG	MKI67	9606.ENSP00000251496	9606.ENSP00000357643	0	0	0	0	0.889	0	0	0.247	0.913
NCAPG	UBE2C	9606.ENSP00000251496	9606.ENSP00000348838	0	0	0	0	0.865	0.067	0	0.421	0.921
NCAPG	CDKN3	9606.ENSP00000251496	9606.ENSP00000335357	0	0	0	0	0.904	0.056	0	0.312	0.932
NCAPG	TACC3	9606.ENSP00000251496	9606.ENSP00000326550	0	0	0	0	0.936	0	0	0.049	0.936
NCAPG	KIF2C	9606.ENSP00000251496	9606.ENSP00000361298	0	0	0	0	0.883	0.077	0	0.467	0.937
NCAPG	BIRC5	9606.ENSP00000251496	9606.ENSP00000301633	0	0	0	0	0.892	0.102	0	0.402	0.937
NCAPG	DTL	9606.ENSP00000251496	9606.ENSP00000355958	0	0	0	0	0.93	0	0	0.142	0.938
NCAPG	PTTG1	9606.ENSP00000251496	9606.ENSP00000377536	0	0	0	0	0.902	0	0	0.452	0.944
NCAPG	BUB1B	9606.ENSP00000251496	9606.ENSP00000287598	0	0	0	0	0.901	0	0	0.469	0.945
NCAPG	KIF4A	9606.ENSP00000251496	9606.ENSP00000363524	0	0	0	0	0.887	0.077	0	0.525	0.946
NCAPG	SHCBP1	9606.ENSP00000251496	9606.ENSP00000306473	0	0	0	0	0.947	0	0	0.066	0.948
NCAPG	RRM2	9606.ENSP00000251496	9606.ENSP00000353770	0	0	0	0	0.925	0	0	0.431	0.955
NCAPG	TYMS	9606.ENSP00000251496	9606.ENSP00000315644	0	0	0	0	0.951	0	0	0.231	0.96
NCAPG	CENPF	9606.ENSP00000251496	9606.ENSP00000355922	0	0	0	0	0.923	0	0	0.525	0.961
NCAPG	PBK	9606.ENSP00000251496	9606.ENSP00000428489	0	0	0	0	0.936	0	0	0.456	0.963
NCAPG	CDCA8	9606.ENSP00000251496	9606.ENSP00000362146	0	0	0	0	0.931	0	0	0.501	0.964
NCAPG	MELK	9606.ENSP00000251496	9606.ENSP00000298048	0	0	0	0	0.925	0	0	0.557	0.965
NCAPG	CDC45	9606.ENSP00000251496	9606.ENSP00000405726	0	0	0	0	0.954	0	0	0.334	0.968
NCAPG	TPX2	9606.ENSP00000251496	9606.ENSP00000300403	0	0	0	0	0.942	0	0	0.522	0.971
NCAPG	KIF20A	9606.ENSP00000251496	9606.ENSP00000378356	0	0	0	0	0.948	0.077	0	0.471	0.972
NCAPG	NUF2	9606.ENSP00000251496	9606.ENSP00000271452	0	0	0	0	0.953	0	0	0.455	0.973
NCAPG	CCNA2	9606.ENSP00000251496	9606.ENSP00000274026	0	0	0	0	0.958	0	0	0.461	0.976
NCAPG	CDC20	9606.ENSP00000251496	9606.ENSP00000361540	0	0	0	0	0.948	0.056	0	0.547	0.976
NCAPG	PRC1	9606.ENSP00000251496	9606.ENSP00000377793	0	0	0	0	0.973	0.27	0	0.368	0.986
NCAPG	BUB1	9606.ENSP00000251496	9606.ENSP00000302530	0	0	0	0	0.974	0	0	0.572	0.988
NCAPG	KIF15	9606.ENSP00000251496	9606.ENSP00000324020	0	0	0	0	0.977	0.077	0	0.49	0.988
NCAPG	NUSAP1	9606.ENSP00000251496	9606.ENSP00000453403	0	0	0	0	0.98	0	0	0.523	0.99
NCAPG	TOP2A	9606.ENSP00000251496	9606.ENSP00000411532	0	0	0	0	0.968	0.104	0	0.681	0.99
NCAPG	NDC80	9606.ENSP00000251496	9606.ENSP00000261597	0	0	0	0	0.98	0	0	0.551	0.991
NCAPG	KIF11	9606.ENSP00000251496	9606.ENSP00000260731	0	0	0	0	0.985	0.155	0	0.508	0.993
NCAPG	CCNB1	9606.ENSP00000251496	9606.ENSP00000256442	0	0	0	0	0.868	0	0.9	0.621	0.994
NCAPG	CCNB2	9606.ENSP00000251496	9606.ENSP00000288207	0	0	0	0	0.936	0	0.9	0.517	0.996
NCAPG	AURKB	9606.ENSP00000251496	9606.ENSP00000313950	0	0	0	0	0.959	0.103	0.9	0.478	0.997
NCAPG	SMC4	9606.ENSP00000251496	9606.ENSP00000349961	0	0	0	0	0.997	0.992	0.9	0.967	0.999
NCAPG	CDK1	9606.ENSP00000251496	9606.ENSP00000378699	0	0	0	0	0.992	0.281	0.9	0.538	0.999
NCAPH	AURKA	9606.ENSP00000240423	9606.ENSP00000216911	0	0	0	0	0.832	0.375	0	0.509	0.944
NCAPH	CCNA2	9606.ENSP00000240423	9606.ENSP00000274026	0	0	0	0	0.838	0	0	0.409	0.9
NCAPH	BUB1B	9606.ENSP00000240423	9606.ENSP00000287598	0	0	0	0	0.844	0	0	0.413	0.904
NCAPH	KIF20A	9606.ENSP00000240423	9606.ENSP00000378356	0	0	0	0	0.812	0.245	0	0.379	0.904
NCAPH	CDCA8	9606.ENSP00000240423	9606.ENSP00000362146	0	0	0	0	0.852	0	0	0.403	0.908
NCAPH	KIF4A	9606.ENSP00000240423	9606.ENSP00000363524	0	0	0	0	0.879	0.15	0	0.432	0.936
NCAPH	CDC20	9606.ENSP00000240423	9606.ENSP00000361540	0	0	0	0	0.906	0	0	0.382	0.939
NCAPH	PRC1	9606.ENSP00000240423	9606.ENSP00000377793	0	0	0	0	0.91	0.138	0	0.31	0.942
NCAPH	BUB1	9606.ENSP00000240423	9606.ENSP00000302530	0	0	0	0	0.916	0	0	0.415	0.949
NCAPH	NDC80	9606.ENSP00000240423	9606.ENSP00000261597	0	0	0	0	0.91	0	0	0.49	0.952
NCAPH	TPX2	9606.ENSP00000240423	9606.ENSP00000300403	0	0	0	0	0.934	0	0	0.323	0.953
NCAPH	KIF11	9606.ENSP00000240423	9606.ENSP00000260731	0	0	0	0	0.918	0.15	0	0.422	0.956
NCAPH	KIF15	9606.ENSP00000240423	9606.ENSP00000324020	0	0	0	0	0.918	0.15	0	0.464	0.959
NCAPH	TOP2A	9606.ENSP00000240423	9606.ENSP00000411532	0	0	0	0	0.783	0.496	0	0.672	0.961
NCAPH	CCNB1	9606.ENSP00000240423	9606.ENSP00000256442	0	0	0	0	0.764	0	0.9	0.377	0.984
NCAPH	CDK1	9606.ENSP00000240423	9606.ENSP00000378699	0	0	0	0	0.746	0.27	0.9	0.425	0.987
NCAPH	CCNB2	9606.ENSP00000240423	9606.ENSP00000288207	0	0	0	0	0.824	0	0.9	0.38	0.988
NCAPH	AURKB	9606.ENSP00000240423	9606.ENSP00000313950	0	0	0	0	0.836	0.524	0.9	0.556	0.996
NCAPH	NCAPG	9606.ENSP00000240423	9606.ENSP00000251496	0	0	0	0	0.994	0.993	0.9	0.955	0.999
NCAPH	SMC4	9606.ENSP00000240423	9606.ENSP00000349961	0	0	0	0	0.992	0.992	0.9	0.936	0.999
NDC80	AURKA	9606.ENSP00000261597	9606.ENSP00000216911	0	0	0	0	0.909	0.499	0	0.677	0.984
NDC80	NCAPH	9606.ENSP00000261597	9606.ENSP00000240423	0	0	0	0	0.91	0	0	0.49	0.952
NDC80	NCAPG	9606.ENSP00000261597	9606.ENSP00000251496	0	0	0	0	0.98	0	0	0.551	0.991
NDC80	CCNB1	9606.ENSP00000261597	9606.ENSP00000256442	0	0	0	0	0.916	0.271	0.72	0.593	0.992
NDC80	KIF11	9606.ENSP00000261597	9606.ENSP00000260731	0	0	0	0	0.975	0.181	0	0.795	0.995
NDC80	TACC3	9606.ENSP00000261597	9606.ENSP00000326550	0	0	0	0	0.877	0	0	0.217	0.9
NDC80	MKI67	9606.ENSP00000261597	9606.ENSP00000357643	0	0	0	0	0.88	0	0	0.26	0.908
NDC80	PTTG1	9606.ENSP00000261597	9606.ENSP00000377536	0	0	0	0	0.819	0	0	0.528	0.911
NDC80	KIAA0101	9606.ENSP00000261597	9606.ENSP00000300035	0	0	0	0	0.918	0	0	0	0.918
NDC80	ECT2	9606.ENSP00000261597	9606.ENSP00000376457	0	0	0	0	0.912	0	0	0.146	0.922
NDC80	UBE2C	9606.ENSP00000261597	9606.ENSP00000348838	0	0	0	0	0.885	0.063	0	0.38	0.927
NDC80	RRM2	9606.ENSP00000261597	9606.ENSP00000353770	0	0	0	0	0.906	0	0	0.293	0.931
NDC80	KIF4A	9606.ENSP00000261597	9606.ENSP00000363524	0	0	0	0	0.888	0.181	0	0.388	0.939
NDC80	MELK	9606.ENSP00000261597	9606.ENSP00000298048	0	0	0	0	0.933	0	0	0.141	0.94
NDC80	TYMS	9606.ENSP00000261597	9606.ENSP00000315644	0	0	0	0	0.921	0	0	0.282	0.941
NDC80	HJURP	9606.ENSP00000261597	9606.ENSP00000414109	0	0	0	0	0.916	0	0	0.374	0.945
NDC80	KIF20A	9606.ENSP00000261597	9606.ENSP00000378356	0	0	0	0	0.931	0.181	0	0.298	0.957
NDC80	TPX2	9606.ENSP00000261597	9606.ENSP00000300403	0	0	0	0	0.926	0	0	0.459	0.958
NDC80	KIF15	9606.ENSP00000261597	9606.ENSP00000324020	0	0	0	0	0.924	0.181	0	0.453	0.963
NDC80	BIRC5	9606.ENSP00000261597	9606.ENSP00000301633	0	0	0	0	0.934	0	0	0.474	0.964
NDC80	PBK	9606.ENSP00000261597	9606.ENSP00000428489	0	0	0	0	0.963	0	0	0.124	0.967
NDC80	PRC1	9606.ENSP00000261597	9606.ENSP00000377793	0	0	0	0	0.946	0	0	0.488	0.971
NDC80	TOP2A	9606.ENSP00000261597	9606.ENSP00000411532	0	0	0	0	0.964	0.177	0	0.232	0.975
NDC80	CCNB2	9606.ENSP00000261597	9606.ENSP00000288207	0	0	0	0	0.959	0	0	0.441	0.976
NDC80	KIF2C	9606.ENSP00000261597	9606.ENSP00000361298	0	0	0	0	0.917	0.181	0	0.7	0.977
NDC80	CCNA2	9606.ENSP00000261597	9606.ENSP00000274026	0	0	0	0	0.967	0	0	0.357	0.978
NDC80	CDCA8	9606.ENSP00000261597	9606.ENSP00000362146	0	0	0	0	0.958	0	0	0.567	0.981
NDC80	NUSAP1	9606.ENSP00000261597	9606.ENSP00000453403	0	0	0	0	0.977	0	0	0.261	0.982
NDC80	SMC4	9606.ENSP00000261597	9606.ENSP00000349961	0	0	0	0	0.95	0.248	0	0.56	0.982
NDC80	SKA3	9606.ENSP00000261597	9606.ENSP00000319417	0	0	0	0	0.826	0	0.72	0.701	0.984
NDC80	CENPU	9606.ENSP00000261597	9606.ENSP00000281453	0	0	0	0	0.788	0	0	0.938	0.986
NDC80	CENPF	9606.ENSP00000261597	9606.ENSP00000355922	0	0	0	0	0.909	0	0.72	0.71	0.991
NDC80	CDC20	9606.ENSP00000261597	9606.ENSP00000361540	0	0	0	0	0.973	0.056	0	0.731	0.992
NDC80	CDK1	9606.ENSP00000261597	9606.ENSP00000378699	0	0	0	0	0.982	0	0	0.579	0.992
NDC80	BUB1B	9606.ENSP00000261597	9606.ENSP00000287598	0	0	0	0	0.923	0.27	0.72	0.859	0.997
NDC80	BUB1	9606.ENSP00000261597	9606.ENSP00000302530	0	0	0	0	0.968	0.895	0.72	0.851	0.999
NDC80	AURKB	9606.ENSP00000261597	9606.ENSP00000313950	0	0	0	0	0.957	0.499	0.9	0.874	0.999
NDC80	NUF2	9606.ENSP00000261597	9606.ENSP00000271452	0	0	0	0	0.964	0.991	0.9	0.994	0.999
NDC80	NEK2	9606.ENSP00000261597	9606.ENSP00000355966	0	0	0	0	0.955	0.491	0	0.97	0.999
NEK2	AURKA	9606.ENSP00000355966	9606.ENSP00000216911	0	0	0.361	0.69	0.876	0	0	0.681	0.912
NEK2	CCNB1	9606.ENSP00000355966	9606.ENSP00000256442	0	0	0	0	0.897	0	0	0.595	0.956
NEK2	KIF11	9606.ENSP00000355966	9606.ENSP00000260731	0	0	0	0	0.92	0.082	0	0.614	0.969
NEK2	NDC80	9606.ENSP00000355966	9606.ENSP00000261597	0	0	0	0	0.955	0.491	0	0.97	0.999
NEK2	CCNA2	9606.ENSP00000355966	9606.ENSP00000274026	0	0	0	0	0.918	0	0	0.621	0.967
NEK2	BUB1B	9606.ENSP00000355966	9606.ENSP00000287598	0	0	0	0	0.907	0.27	0.6	0.654	0.989
NEK2	CCNB2	9606.ENSP00000355966	9606.ENSP00000288207	0	0	0	0	0.956	0	0	0.564	0.98
NEK2	TPX2	9606.ENSP00000355966	9606.ENSP00000300403	0	0	0	0	0.86	0	0	0.625	0.945
NEK2	BIRC5	9606.ENSP00000355966	9606.ENSP00000301633	0	0	0	0	0.893	0.164	0	0.499	0.951
NEK2	BUB1	9606.ENSP00000355966	9606.ENSP00000302530	0	0	0	0	0.931	0	0	0.637	0.973
NEK2	AURKB	9606.ENSP00000355966	9606.ENSP00000313950	0	0	0.388	0.695	0.888	0	0	0.655	0.92
NEK2	KIF15	9606.ENSP00000355966	9606.ENSP00000324020	0	0	0	0	0.852	0.058	0	0.4	0.909
NEK2	UBE2C	9606.ENSP00000355966	9606.ENSP00000348838	0	0	0	0	0.825	0.123	0.6	0.557	0.969
NEK2	RRM2	9606.ENSP00000355966	9606.ENSP00000353770	0	0	0	0	0.879	0	0	0.403	0.924
NEK2	CENPF	9606.ENSP00000355966	9606.ENSP00000355922	0	0	0	0	0.893	0	0	0.656	0.961
NEK2	PRC1	9606.ENSP00000355966	9606.ENSP00000377793	0	0	0	0	0.8	0	0	0.529	0.902
NEK2	PBK	9606.ENSP00000355966	9606.ENSP00000428489	0	0	0	0.575	0.886	0.127	0	0.528	0.919
NEK2	HJURP	9606.ENSP00000355966	9606.ENSP00000414109	0	0	0	0	0.912	0	0	0.209	0.928
NEK2	KIF4A	9606.ENSP00000355966	9606.ENSP00000363524	0	0	0	0	0.897	0.058	0	0.394	0.936
NEK2	CDK1	9606.ENSP00000355966	9606.ENSP00000378699	0	0	0.345	0.74	0.922	0	0	0.625	0.94
NEK2	NUSAP1	9606.ENSP00000355966	9606.ENSP00000453403	0	0	0	0	0.919	0	0	0.369	0.947
NEK2	KIF2C	9606.ENSP00000355966	9606.ENSP00000361298	0	0	0	0	0.895	0.058	0	0.519	0.948
NEK2	CDCA8	9606.ENSP00000355966	9606.ENSP00000362146	0	0	0	0	0.915	0	0	0.543	0.959
NEK2	KIF20A	9606.ENSP00000355966	9606.ENSP00000378356	0	0	0	0	0.923	0.058	0	0.478	0.959
NEK2	TOP2A	9606.ENSP00000355966	9606.ENSP00000411532	0	0	0	0	0.919	0	0	0.517	0.959
NEK2	CDC20	9606.ENSP00000355966	9606.ENSP00000361540	0	0	0	0	0.947	0.675	0.6	0.878	0.999
NID2	LAMC1	9606.ENSP00000216286	9606.ENSP00000258341	0	0	0	0	0.174	0.521	0.6	0.836	0.97
NID2	HSPG2	9606.ENSP00000216286	9606.ENSP00000363827	0	0	0	0	0.196	0.792	0.6	0.897	0.992
NNMT	NAMPT	9606.ENSP00000441434	9606.ENSP00000222553	0	0	0	0	0	0	0.9	0.527	0.95
NNMT	EGFR	9606.ENSP00000441434	9606.ENSP00000275493	0	0	0	0	0.945	0.071	0	0.154	0.952
NR4A3	RUNX1	9606.ENSP00000482027	9606.ENSP00000300305	0	0	0	0	0	0	0.9	0.071	0.903
NUF2	AURKA	9606.ENSP00000271452	9606.ENSP00000216911	0	0	0	0	0.74	0.27	0	0.566	0.91
NUF2	NCAPG	9606.ENSP00000271452	9606.ENSP00000251496	0	0	0	0	0.953	0	0	0.455	0.973
NUF2	KIF11	9606.ENSP00000271452	9606.ENSP00000260731	0	0	0	0	0.944	0.138	0	0.761	0.987
NUF2	NDC80	9606.ENSP00000271452	9606.ENSP00000261597	0	0	0	0	0.964	0.991	0.9	0.994	0.999
NUF2	PTTG1	9606.ENSP00000271452	9606.ENSP00000377536	0	0	0	0	0.806	0	0	0.518	0.902
NUF2	UBE2C	9606.ENSP00000271452	9606.ENSP00000348838	0	0	0	0	0.817	0	0	0.504	0.905
NUF2	CDC45	9606.ENSP00000271452	9606.ENSP00000405726	0	0	0	0	0.877	0	0	0.269	0.906
NUF2	KIF2C	9606.ENSP00000271452	9606.ENSP00000361298	0	0	0	0	0.755	0.138	0	0.614	0.911
NUF2	BIRC5	9606.ENSP00000271452	9606.ENSP00000301633	0	0	0	0	0.839	0	0	0.494	0.915
NUF2	SMC4	9606.ENSP00000271452	9606.ENSP00000349961	0	0	0	0	0.783	0.137	0	0.594	0.917
NUF2	MELK	9606.ENSP00000271452	9606.ENSP00000298048	0	0	0	0	0.87	0.069	0	0.381	0.918
NUF2	CCNA2	9606.ENSP00000271452	9606.ENSP00000274026	0	0	0	0	0.879	0	0	0.374	0.921
NUF2	KIF20A	9606.ENSP00000271452	9606.ENSP00000378356	0	0	0	0	0.826	0.138	0	0.533	0.924
NUF2	TYMS	9606.ENSP00000271452	9606.ENSP00000315644	0	0	0	0	0.821	0	0	0.596	0.924
NUF2	TOP2A	9606.ENSP00000271452	9606.ENSP00000411532	0	0	0	0	0.855	0.056	0	0.538	0.931
NUF2	CCNB2	9606.ENSP00000271452	9606.ENSP00000288207	0	0	0	0	0.886	0	0	0.424	0.932
NUF2	CDCA8	9606.ENSP00000271452	9606.ENSP00000362146	0	0	0	0	0.871	0	0	0.558	0.941
NUF2	TPX2	9606.ENSP00000271452	9606.ENSP00000300403	0	0	0	0	0.899	0	0	0.511	0.949
NUF2	PBK	9606.ENSP00000271452	9606.ENSP00000428489	0	0	0	0	0.919	0	0	0.413	0.95
NUF2	BUB1B	9606.ENSP00000271452	9606.ENSP00000287598	0	0	0	0	0.801	0.15	0	0.754	0.954
NUF2	CENPF	9606.ENSP00000271452	9606.ENSP00000355922	0	0	0	0	0.892	0	0	0.622	0.957
NUF2	CDC20	9606.ENSP00000271452	9606.ENSP00000361540	0	0	0	0	0.914	0.056	0	0.623	0.967
NUF2	NUSAP1	9606.ENSP00000271452	9606.ENSP00000453403	0	0	0	0	0.935	0	0	0.55	0.969
NUF2	AURKB	9606.ENSP00000271452	9606.ENSP00000313950	0	0	0	0	0.829	0.27	0	0.806	0.973
NUF2	CDK1	9606.ENSP00000271452	9606.ENSP00000378699	0	0	0	0	0.965	0	0	0.434	0.979
NUF2	BUB1	9606.ENSP00000271452	9606.ENSP00000302530	0	0	0	0	0.891	0.77	0	0.811	0.994
NUSAP1	AURKA	9606.ENSP00000453403	9606.ENSP00000216911	0	0	0	0	0.947	0	0	0.454	0.97
NUSAP1	OIP5	9606.ENSP00000453403	9606.ENSP00000220514	0	0	0	0	0.871	0	0	0.656	0.954
NUSAP1	NCAPG	9606.ENSP00000453403	9606.ENSP00000251496	0	0	0	0	0.98	0	0	0.523	0.99
NUSAP1	CCNB1	9606.ENSP00000453403	9606.ENSP00000256442	0	0	0	0	0.884	0	0	0.504	0.94
NUSAP1	KIF11	9606.ENSP00000453403	9606.ENSP00000260731	0	0	0	0	0.986	0	0	0.578	0.993
NUSAP1	NDC80	9606.ENSP00000453403	9606.ENSP00000261597	0	0	0	0	0.977	0	0	0.261	0.982
NUSAP1	NUF2	9606.ENSP00000453403	9606.ENSP00000271452	0	0	0	0	0.935	0	0	0.55	0.969
NUSAP1	CCNA2	9606.ENSP00000453403	9606.ENSP00000274026	0	0	0	0	0.981	0	0	0.455	0.989
NUSAP1	BUB1B	9606.ENSP00000453403	9606.ENSP00000287598	0	0	0	0	0.922	0	0	0.609	0.968
NUSAP1	CCNB2	9606.ENSP00000453403	9606.ENSP00000288207	0	0	0	0	0.956	0	0	0.563	0.98
NUSAP1	MELK	9606.ENSP00000453403	9606.ENSP00000298048	0	0	0	0	0.872	0	0	0.519	0.936
NUSAP1	KIAA0101	9606.ENSP00000453403	9606.ENSP00000300035	0	0	0	0	0.891	0	0	0.517	0.945
NUSAP1	TPX2	9606.ENSP00000453403	9606.ENSP00000300403	0	0	0	0	0.913	0	0	0.661	0.969
NUSAP1	BIRC5	9606.ENSP00000453403	9606.ENSP00000301633	0	0	0	0	0.908	0	0	0.566	0.958
NUSAP1	BUB1	9606.ENSP00000453403	9606.ENSP00000302530	0	0	0	0	0.93	0	0	0.555	0.967
NUSAP1	AURKB	9606.ENSP00000453403	9606.ENSP00000313950	0	0	0	0	0.93	0	0	0.459	0.96
NUSAP1	KIF15	9606.ENSP00000453403	9606.ENSP00000324020	0	0	0	0	0.886	0	0	0.535	0.945
NUSAP1	TACC3	9606.ENSP00000453403	9606.ENSP00000326550	0	0	0	0	0.932	0	0	0.334	0.953
NUSAP1	FOXM1	9606.ENSP00000453403	9606.ENSP00000342307	0	0	0	0	0.889	0.07	0	0.365	0.928
NUSAP1	UBE2C	9606.ENSP00000453403	9606.ENSP00000348838	0	0	0	0	0.935	0	0	0.629	0.975
NUSAP1	SMC4	9606.ENSP00000453403	9606.ENSP00000349961	0	0	0	0	0.852	0	0	0.387	0.906
NUSAP1	RRM2	9606.ENSP00000453403	9606.ENSP00000353770	0	0	0	0	0.924	0	0	0.595	0.968
NUSAP1	CENPF	9606.ENSP00000453403	9606.ENSP00000355922	0	0	0	0	0.95	0	0	0.561	0.977
NUSAP1	NEK2	9606.ENSP00000453403	9606.ENSP00000355966	0	0	0	0	0.919	0	0	0.369	0.947
NUSAP1	MKI67	9606.ENSP00000453403	9606.ENSP00000357643	0	0	0	0	0.964	0	0	0.469	0.98
NUSAP1	KIF2C	9606.ENSP00000453403	9606.ENSP00000361298	0	0	0	0	0.907	0	0	0.466	0.948
NUSAP1	CDC20	9606.ENSP00000453403	9606.ENSP00000361540	0	0	0	0	0.981	0	0	0.557	0.991
NUSAP1	CDCA8	9606.ENSP00000453403	9606.ENSP00000362146	0	0	0	0	0.965	0	0	0.537	0.983
NUSAP1	KIF4A	9606.ENSP00000453403	9606.ENSP00000363524	0	0	0	0	0.859	0	0	0.517	0.929
NUSAP1	ECT2	9606.ENSP00000453403	9606.ENSP00000376457	0	0	0	0	0.884	0	0	0.335	0.92
NUSAP1	PTTG1	9606.ENSP00000453403	9606.ENSP00000377536	0	0	0	0	0.859	0	0	0.47	0.922
NUSAP1	PRC1	9606.ENSP00000453403	9606.ENSP00000377793	0	0	0	0	0.965	0	0	0.529	0.982
NUSAP1	KIF20A	9606.ENSP00000453403	9606.ENSP00000378356	0	0	0	0	0.938	0.27	0	0.527	0.977
NUSAP1	CDK1	9606.ENSP00000453403	9606.ENSP00000378699	0	0	0	0	0.992	0	0	0.462	0.995
NUSAP1	TOP2A	9606.ENSP00000453403	9606.ENSP00000411532	0	0	0	0	0.966	0	0	0.649	0.987
NUSAP1	HJURP	9606.ENSP00000453403	9606.ENSP00000414109	0	0	0	0	0.906	0	0	0.392	0.94
NUSAP1	PBK	9606.ENSP00000453403	9606.ENSP00000428489	0	0	0	0	0.941	0	0	0.52	0.97
OAS1	OAS3	9606.ENSP00000388001	9606.ENSP00000228928	0	0	0	0.933	0.811	0	0.8	0.9	0.963
OAS1	EGR1	9606.ENSP00000388001	9606.ENSP00000239938	0	0	0	0	0	0	0.9	0.17	0.913
OAS1	IRF1	9606.ENSP00000388001	9606.ENSP00000245414	0	0	0	0	0.137	0	0.9	0.593	0.961
OAS1	OAS2	9606.ENSP00000388001	9606.ENSP00000342278	0	0	0	0.929	0.792	0	0.8	0.9	0.959
OAS1	IFI6	9606.ENSP00000388001	9606.ENSP00000342513	0	0	0	0	0.833	0	0.9	0.703	0.994
OAS1	STAT1	9606.ENSP00000388001	9606.ENSP00000354394	0	0	0	0	0.68	0	0.9	0.69	0.989
OAS1	GBP2	9606.ENSP00000388001	9606.ENSP00000359497	0	0	0	0	0.155	0	0.9	0.468	0.951
OAS1	ISG15	9606.ENSP00000388001	9606.ENSP00000368699	0	0	0	0	0.891	0	0.9	0.804	0.997
OAS1	RSAD2	9606.ENSP00000388001	9606.ENSP00000371471	0	0	0	0	0.795	0	0.9	0.71	0.993
OAS1	MX1	9606.ENSP00000388001	9606.ENSP00000381601	0	0	0	0	0.879	0	0.9	0.857	0.998
OAS2	OAS3	9606.ENSP00000342278	9606.ENSP00000228928	0	0	0	0.913	0.78	0	0.8	0.95	0.957
OAS2	EGR1	9606.ENSP00000342278	9606.ENSP00000239938	0	0	0	0	0	0	0.9	0.134	0.909
OAS2	IRF1	9606.ENSP00000342278	9606.ENSP00000245414	0	0	0	0	0.16	0	0.9	0.583	0.962
OAS2	GBP2	9606.ENSP00000342278	9606.ENSP00000359497	0	0	0	0	0.18	0	0.9	0.518	0.957
OAS2	OAS1	9606.ENSP00000342278	9606.ENSP00000388001	0	0	0	0.929	0.792	0	0.8	0.9	0.959
OAS2	STAT1	9606.ENSP00000342278	9606.ENSP00000354394	0	0	0	0	0.684	0	0.9	0.653	0.988
OAS2	IFI6	9606.ENSP00000342278	9606.ENSP00000342513	0	0	0	0	0.774	0	0.9	0.61	0.99
OAS2	ISG15	9606.ENSP00000342278	9606.ENSP00000368699	0	0	0	0	0.785	0	0.9	0.759	0.994
OAS2	MX1	9606.ENSP00000342278	9606.ENSP00000381601	0	0	0	0	0.787	0	0.9	0.796	0.995
OAS2	RSAD2	9606.ENSP00000342278	9606.ENSP00000371471	0	0	0	0	0.788	0.335	0.9	0.7	0.995
OAS3	EGR1	9606.ENSP00000228928	9606.ENSP00000239938	0	0	0	0	0	0	0.9	0.15	0.911
OAS3	GBP2	9606.ENSP00000228928	9606.ENSP00000359497	0	0	0	0	0.108	0	0.9	0.39	0.94
OAS3	IRF1	9606.ENSP00000228928	9606.ENSP00000245414	0	0	0	0	0.108	0	0.9	0.45	0.946
OAS3	OAS2	9606.ENSP00000228928	9606.ENSP00000342278	0	0	0	0.913	0.78	0	0.8	0.95	0.957
OAS3	OAS1	9606.ENSP00000228928	9606.ENSP00000388001	0	0	0	0.933	0.811	0	0.8	0.9	0.963
OAS3	STAT1	9606.ENSP00000228928	9606.ENSP00000354394	0	0	0	0	0.673	0	0.9	0.676	0.988
OAS3	IFI6	9606.ENSP00000228928	9606.ENSP00000342513	0	0	0	0	0.78	0	0.9	0.652	0.991
OAS3	MX1	9606.ENSP00000228928	9606.ENSP00000381601	0	0	0	0	0.793	0	0.9	0.732	0.993
OAS3	ISG15	9606.ENSP00000228928	9606.ENSP00000368699	0	0	0	0	0.828	0	0.9	0.715	0.994
OAS3	RSAD2	9606.ENSP00000228928	9606.ENSP00000371471	0	0	0	0	0.786	0.335	0.9	0.635	0.994
OGN	B3GNT7	9606.ENSP00000262551	9606.ENSP00000287590	0	0	0	0	0.053	0.056	0.9	0.09	0.907
OGN	FMOD	9606.ENSP00000262551	9606.ENSP00000347041	0	0	0	0.631	0.139	0	0.9	0.823	0.937
OGN	LUM	9606.ENSP00000262551	9606.ENSP00000266718	0	0	0	0.656	0.233	0	0.9	0.853	0.943
OIP5	PRC1	9606.ENSP00000220514	9606.ENSP00000377793	0	0	0	0	0.833	0	0	0.431	0.901
OIP5	CDK1	9606.ENSP00000220514	9606.ENSP00000378699	0	0	0	0	0.861	0	0	0.383	0.911
OIP5	CCNA2	9606.ENSP00000220514	9606.ENSP00000274026	0	0	0	0	0.872	0	0	0.355	0.914
OIP5	PBK	9606.ENSP00000220514	9606.ENSP00000428489	0	0	0	0	0.891	0	0	0.253	0.915
OIP5	CCNB1	9606.ENSP00000220514	9606.ENSP00000256442	0	0	0	0	0.902	0	0	0.176	0.916
OIP5	MELK	9606.ENSP00000220514	9606.ENSP00000298048	0	0	0	0	0.894	0	0	0.25	0.917
OIP5	TPX2	9606.ENSP00000220514	9606.ENSP00000300403	0	0	0	0	0.839	0	0	0.52	0.919
OIP5	BUB1	9606.ENSP00000220514	9606.ENSP00000302530	0	0	0	0	0.899	0	0	0.261	0.922
OIP5	NCAPG	9606.ENSP00000220514	9606.ENSP00000251496	0	0	0	0	0.898	0	0	0.293	0.924
OIP5	CDCA8	9606.ENSP00000220514	9606.ENSP00000362146	0	0	0	0	0.901	0	0	0.294	0.927
OIP5	CENPU	9606.ENSP00000220514	9606.ENSP00000281453	0	0	0	0	0.783	0	0.6	0.335	0.937
OIP5	NUSAP1	9606.ENSP00000220514	9606.ENSP00000453403	0	0	0	0	0.871	0	0	0.656	0.954
OIP5	HJURP	9606.ENSP00000220514	9606.ENSP00000414109	0	0	0	0	0.775	0.27	0.6	0.9	0.992
PBK	AURKA	9606.ENSP00000428489	9606.ENSP00000216911	0	0	0	0	0.873	0.075	0	0.419	0.926
PBK	OIP5	9606.ENSP00000428489	9606.ENSP00000220514	0	0	0	0	0.891	0	0	0.253	0.915
PBK	NCAPG	9606.ENSP00000428489	9606.ENSP00000251496	0	0	0	0	0.936	0	0	0.456	0.963
PBK	CCNB1	9606.ENSP00000428489	9606.ENSP00000256442	0	0	0	0	0.936	0.263	0	0.494	0.974
PBK	KIF11	9606.ENSP00000428489	9606.ENSP00000260731	0	0	0	0	0.942	0.104	0	0.437	0.968
PBK	NDC80	9606.ENSP00000428489	9606.ENSP00000261597	0	0	0	0	0.963	0	0	0.124	0.967
PBK	NUF2	9606.ENSP00000428489	9606.ENSP00000271452	0	0	0	0	0.919	0	0	0.413	0.95
PBK	CCNA2	9606.ENSP00000428489	9606.ENSP00000274026	0	0	0	0	0.949	0.103	0	0.361	0.968
PBK	BUB1B	9606.ENSP00000428489	9606.ENSP00000287598	0	0	0	0	0.946	0.063	0	0.509	0.973
PBK	CCNB2	9606.ENSP00000428489	9606.ENSP00000288207	0	0	0	0	0.95	0.103	0	0.391	0.97
PBK	MELK	9606.ENSP00000428489	9606.ENSP00000298048	0	0	0	0	0.952	0.136	0	0.56	0.98
PBK	TPX2	9606.ENSP00000428489	9606.ENSP00000300403	0	0	0	0	0.926	0.057	0	0.379	0.953
PBK	BIRC5	9606.ENSP00000428489	9606.ENSP00000301633	0	0	0	0	0.959	0.116	0	0.455	0.978
PBK	BUB1	9606.ENSP00000428489	9606.ENSP00000302530	0	0	0	0	0.944	0.063	0	0.467	0.97
PBK	AURKB	9606.ENSP00000428489	9606.ENSP00000313950	0	0	0	0	0.857	0.075	0	0.375	0.91
PBK	CDKN3	9606.ENSP00000428489	9606.ENSP00000335357	0	0	0	0	0.904	0.111	0	0.152	0.922
PBK	UBE2C	9606.ENSP00000428489	9606.ENSP00000348838	0	0	0	0	0.934	0.067	0	0.341	0.955
PBK	RRM2	9606.ENSP00000428489	9606.ENSP00000353770	0	0	0	0	0.936	0	0	0.393	0.959
PBK	CENPF	9606.ENSP00000428489	9606.ENSP00000355922	0	0	0	0	0.916	0	0	0.459	0.952
PBK	NEK2	9606.ENSP00000428489	9606.ENSP00000355966	0	0	0	0.575	0.886	0.127	0	0.528	0.919
PBK	KIF2C	9606.ENSP00000428489	9606.ENSP00000361298	0	0	0	0	0.913	0.104	0	0.359	0.945
PBK	CDC20	9606.ENSP00000428489	9606.ENSP00000361540	0	0	0	0	0.962	0.071	0	0.425	0.978
PBK	CDCA8	9606.ENSP00000428489	9606.ENSP00000362146	0	0	0	0	0.915	0	0	0.391	0.946
PBK	KIF4A	9606.ENSP00000428489	9606.ENSP00000363524	0	0	0	0	0.896	0.104	0	0.378	0.937
PBK	PTTG1	9606.ENSP00000428489	9606.ENSP00000377536	0	0	0	0	0.908	0	0	0.374	0.94
PBK	PRC1	9606.ENSP00000428489	9606.ENSP00000377793	0	0	0	0	0.873	0	0	0.321	0.91
PBK	KIF20A	9606.ENSP00000428489	9606.ENSP00000378356	0	0	0	0	0.935	0.104	0	0.455	0.966
PBK	CDK1	9606.ENSP00000428489	9606.ENSP00000378699	0	0	0	0	0.989	0.474	0	0.784	0.998
PBK	TOP2A	9606.ENSP00000428489	9606.ENSP00000411532	0	0	0	0	0.982	0	0	0.556	0.992
PBK	NUSAP1	9606.ENSP00000428489	9606.ENSP00000453403	0	0	0	0	0.941	0	0	0.52	0.97
PCOLCE	LOXL2	9606.ENSP00000223061	9606.ENSP00000373783	0	0	0	0	0.171	0	0.9	0.202	0.928
PCOLCE	COL5A2	9606.ENSP00000223061	9606.ENSP00000364000	0	0	0	0	0.242	0.173	0.9	0.425	0.959
PCOLCE	COL1A1	9606.ENSP00000223061	9606.ENSP00000225964	0	0	0	0	0.544	0.173	0.9	0.415	0.975
PCOLCE	COL5A1	9606.ENSP00000223061	9606.ENSP00000360882	0	0	0	0	0.374	0.497	0.9	0.48	0.981
PCOLCE	COL1A2	9606.ENSP00000223061	9606.ENSP00000297268	0	0	0	0	0.557	0.151	0.9	0.626	0.984
PCOLCE	COL3A1	9606.ENSP00000223061	9606.ENSP00000304408	0	0	0	0	0.487	0.857	0.9	0.418	0.995
PDGFD	PLAT	9606.ENSP00000376865	9606.ENSP00000220809	0	0	0	0	0.062	0	0.9	0.21	0.919
PDGFD	PLAUR	9606.ENSP00000376865	9606.ENSP00000339328	0	0	0	0	0	0	0.9	0.19	0.915
PDGFD	PLAU	9606.ENSP00000376865	9606.ENSP00000361850	0	0	0	0	0	0	0.9	0.21	0.917
PDLIM1	ACTN1	9606.ENSP00000360305	9606.ENSP00000377941	0	0	0	0	0.094	0.842	0	0.672	0.949
PDPN	CD44	9606.ENSP00000294489	9606.ENSP00000398632	0	0	0	0	0.063	0	0	0.92	0.923
PLAT	PDGFD	9606.ENSP00000220809	9606.ENSP00000376865	0	0	0	0	0.062	0	0.9	0.21	0.919
PLAT	ANXA2	9606.ENSP00000220809	9606.ENSP00000346032	0	0	0	0	0.096	0.47	0.9	0.988	0.999
PLAT	SERPINE1	9606.ENSP00000220809	9606.ENSP00000223095	0	0	0	0	0.147	0.937	0.8	0.99	0.999
PLAU	ITGA3	9606.ENSP00000361850	9606.ENSP00000007722	0	0	0	0	0.098	0	0.9	0.27	0.928
PLAU	SERPINE1	9606.ENSP00000361850	9606.ENSP00000223095	0	0	0	0	0.214	0.976	0.9	0.989	0.999
PLAU	EGFR	9606.ENSP00000361850	9606.ENSP00000275493	0	0	0	0	0.088	0	0.9	0.626	0.962
PLAU	ITGA5	9606.ENSP00000361850	9606.ENSP00000293379	0	0	0	0	0.18	0	0.9	0.415	0.947
PLAU	PLAUR	9606.ENSP00000361850	9606.ENSP00000339328	0	0	0	0	0.221	0.975	0.9	0.989	0.999
PLAU	FN1	9606.ENSP00000361850	9606.ENSP00000346839	0	0	0	0	0.102	0	0.9	0.69	0.969
PLAU	PDGFD	9606.ENSP00000361850	9606.ENSP00000376865	0	0	0	0	0	0	0.9	0.21	0.917
PLAUR	ITGA3	9606.ENSP00000339328	9606.ENSP00000007722	0	0	0	0	0	0	0.9	0.501	0.948
PLAUR	SERPINE1	9606.ENSP00000339328	9606.ENSP00000223095	0	0	0	0	0.162	0	0.9	0.989	0.999
PLAUR	EGFR	9606.ENSP00000339328	9606.ENSP00000275493	0	0	0	0	0	0	0.9	0.987	0.998
PLAUR	ITGA5	9606.ENSP00000339328	9606.ENSP00000293379	0	0	0	0	0.17	0	0.9	0.346	0.941
PLAUR	MET	9606.ENSP00000339328	9606.ENSP00000317272	0	0	0	0	0.062	0	0.9	0.459	0.944
PLAUR	PDGFD	9606.ENSP00000339328	9606.ENSP00000376865	0	0	0	0	0	0	0.9	0.19	0.915
PLAUR	FPR3	9606.ENSP00000339328	9606.ENSP00000341821	0	0	0	0	0.064	0	0.9	0.384	0.937
PLAUR	SRPX2	9606.ENSP00000339328	9606.ENSP00000362095	0	0	0	0	0.076	0.213	0	0.947	0.958
PLAUR	FPR1	9606.ENSP00000339328	9606.ENSP00000471493	0	0	0	0	0.141	0	0.9	0.83	0.984
PLAUR	FN1	9606.ENSP00000339328	9606.ENSP00000346839	0	0	0	0	0.062	0	0.9	0.844	0.984
PLAUR	PLAU	9606.ENSP00000339328	9606.ENSP00000361850	0	0	0	0	0.221	0.975	0.9	0.989	0.999
PLK4	KIF11	9606.ENSP00000270861	9606.ENSP00000260731	0	0	0	0	0.879	0.143	0	0.604	0.955
PLK4	CCNA2	9606.ENSP00000270861	9606.ENSP00000274026	0	0	0	0	0.829	0.082	0	0.441	0.904
PLK4	CCNB2	9606.ENSP00000270861	9606.ENSP00000288207	0	0	0	0	0.801	0.082	0	0.517	0.904
PLK4	BUB1B	9606.ENSP00000270861	9606.ENSP00000287598	0	0	0	0	0.746	0.268	0	0.591	0.917
PLK4	BUB1	9606.ENSP00000270861	9606.ENSP00000302530	0	0	0	0	0.841	0.268	0	0.546	0.942
PLSCR1	EGFR	9606.ENSP00000345494	9606.ENSP00000275493	0	0	0	0	0	0.462	0	0.83	0.904
POSTN	COL1A2	9606.ENSP00000369071	9606.ENSP00000297268	0	0	0	0	0.738	0.392	0	0.585	0.928
POSTN	COL3A1	9606.ENSP00000369071	9606.ENSP00000304408	0	0	0	0	0.798	0.103	0	0.609	0.923
POSTN	FN1	9606.ENSP00000369071	9606.ENSP00000346839	0	0	0	0	0.339	0	0	0.988	0.992
PRC1	AURKA	9606.ENSP00000377793	9606.ENSP00000216911	0	0	0	0	0.927	0.13	0	0.545	0.968
PRC1	OIP5	9606.ENSP00000377793	9606.ENSP00000220514	0	0	0	0	0.833	0	0	0.431	0.901
PRC1	NCAPH	9606.ENSP00000377793	9606.ENSP00000240423	0	0	0	0	0.91	0.138	0	0.31	0.942
PRC1	NCAPG	9606.ENSP00000377793	9606.ENSP00000251496	0	0	0	0	0.973	0.27	0	0.368	0.986
PRC1	CCNB1	9606.ENSP00000377793	9606.ENSP00000256442	0	0	0	0	0.938	0.365	0	0.55	0.98
PRC1	KIF11	9606.ENSP00000377793	9606.ENSP00000260731	0	0	0	0	0.963	0.369	0	0.767	0.994
PRC1	NDC80	9606.ENSP00000377793	9606.ENSP00000261597	0	0	0	0	0.946	0	0	0.488	0.971
PRC1	CCNA2	9606.ENSP00000377793	9606.ENSP00000274026	0	0	0	0	0.926	0.321	0	0.281	0.961
PRC1	BUB1B	9606.ENSP00000377793	9606.ENSP00000287598	0	0	0	0	0.925	0	0	0.455	0.957
PRC1	CCNB2	9606.ENSP00000377793	9606.ENSP00000288207	0	0	0	0	0.904	0.167	0	0.613	0.966
PRC1	KIAA0101	9606.ENSP00000377793	9606.ENSP00000300035	0	0	0	0	0.834	0	0	0.43	0.901
PRC1	TPX2	9606.ENSP00000377793	9606.ENSP00000300403	0	0	0	0	0.965	0.27	0	0.593	0.988
PRC1	BIRC5	9606.ENSP00000377793	9606.ENSP00000301633	0	0	0	0	0.849	0.27	0	0.403	0.928
PRC1	BUB1	9606.ENSP00000377793	9606.ENSP00000302530	0	0	0	0	0.919	0	0	0.428	0.952
PRC1	AURKB	9606.ENSP00000377793	9606.ENSP00000313950	0	0	0	0	0.901	0.337	0	0.597	0.971
PRC1	TACC3	9606.ENSP00000377793	9606.ENSP00000326550	0	0	0	0	0.895	0	0	0.126	0.904
PRC1	CDKN3	9606.ENSP00000377793	9606.ENSP00000335357	0	0	0	0	0.819	0.309	0	0.489	0.93
PRC1	UBE2C	9606.ENSP00000377793	9606.ENSP00000348838	0	0	0	0	0.898	0	0	0.254	0.921
PRC1	SMC4	9606.ENSP00000377793	9606.ENSP00000349961	0	0	0	0	0.883	0.289	0	0.343	0.94
PRC1	CENPF	9606.ENSP00000377793	9606.ENSP00000355922	0	0	0	0	0.817	0.27	0	0.347	0.905
PRC1	NEK2	9606.ENSP00000377793	9606.ENSP00000355966	0	0	0	0	0.8	0	0	0.529	0.902
PRC1	KIF2C	9606.ENSP00000377793	9606.ENSP00000361298	0	0	0	0	0.838	0.213	0	0.365	0.912
PRC1	CDC20	9606.ENSP00000377793	9606.ENSP00000361540	0	0	0	0	0.966	0	0	0.589	0.985
PRC1	CDCA8	9606.ENSP00000377793	9606.ENSP00000362146	0	0	0	0	0.881	0.27	0	0.244	0.928
PRC1	KIF4A	9606.ENSP00000377793	9606.ENSP00000363524	0	0	0	0	0.945	0.733	0	0.841	0.997
PRC1	ECT2	9606.ENSP00000377793	9606.ENSP00000376457	0	0	0	0	0.916	0	0	0.457	0.952
PRC1	PBK	9606.ENSP00000377793	9606.ENSP00000428489	0	0	0	0	0.873	0	0	0.321	0.91
PRC1	KIFC1	9606.ENSP00000377793	9606.ENSP00000393963	0	0	0	0	0.739	0.213	0	0.614	0.914
PRC1	TOP2A	9606.ENSP00000377793	9606.ENSP00000411532	0	0	0	0	0.906	0.343	0	0.373	0.958
PRC1	CDC45	9606.ENSP00000377793	9606.ENSP00000405726	0	0	0	0	0.958	0	0	0.049	0.958
PRC1	NUSAP1	9606.ENSP00000377793	9606.ENSP00000453403	0	0	0	0	0.965	0	0	0.529	0.982
PRC1	CDK1	9606.ENSP00000377793	9606.ENSP00000378699	0	0	0	0	0.966	0.425	0	0.483	0.989
PRC1	KIF20A	9606.ENSP00000377793	9606.ENSP00000378356	0	0	0	0	0.892	0.4	0.9	0.455	0.996
PTPRC	CD22	9606.ENSP00000411355	9606.ENSP00000085219	0	0	0	0	0.18	0.683	0.8	0.988	0.999
PTPRC	HLA-DQA1	9606.ENSP00000411355	9606.ENSP00000339398	0	0	0	0	0.177	0	0.9	0.321	0.939
PTPRC	HLA-DRB1	9606.ENSP00000411355	9606.ENSP00000353099	0	0	0	0	0.221	0	0.9	0.417	0.95
PTPRC	FCGR3A	9606.ENSP00000411355	9606.ENSP00000356946	0	0	0	0	0.291	0.33	0	0.857	0.926
PTPRC	HLA-DQA2	9606.ENSP00000411355	9606.ENSP00000364076	0	0	0	0	0.11	0	0.9	0.134	0.916
PTPRC	HLA-DQB1	9606.ENSP00000411355	9606.ENSP00000364080	0	0	0	0	0.179	0	0.9	0.553	0.96
PTPRC	HLA-DRB5	9606.ENSP00000411355	9606.ENSP00000364114	0	0	0	0	0.105	0	0.9	0.249	0.926
PTPRC	HLA-DRA	9606.ENSP00000411355	9606.ENSP00000378786	0	0	0	0	0.326	0	0.9	0.289	0.947
PTPRC	HLA-DQB2	9606.ENSP00000411355	9606.ENSP00000390431	0	0	0	0	0.117	0	0.9	0.628	0.964
PTPRC	HLA-DPA1	9606.ENSP00000411355	9606.ENSP00000393566	0	0	0	0	0.254	0	0.9	0.119	0.928
PTPRC	CD44	9606.ENSP00000411355	9606.ENSP00000398632	0	0	0	0	0.083	0.341	0	0.887	0.926
PTPRC	HLA-DPB1	9606.ENSP00000411355	9606.ENSP00000408146	0	0	0	0	0.152	0	0.9	0.133	0.92
PTTG1	AURKA	9606.ENSP00000377536	9606.ENSP00000216911	0	0	0	0	0.907	0.308	0.9	0.692	0.997
PTTG1	NCAPG	9606.ENSP00000377536	9606.ENSP00000251496	0	0	0	0	0.902	0	0	0.452	0.944
PTTG1	CCNB1	9606.ENSP00000377536	9606.ENSP00000256442	0	0	0	0	0.929	0	0	0.792	0.984
PTTG1	KIF11	9606.ENSP00000377536	9606.ENSP00000260731	0	0	0	0	0.8	0	0	0.535	0.903
PTTG1	NDC80	9606.ENSP00000377536	9606.ENSP00000261597	0	0	0	0	0.819	0	0	0.528	0.911
PTTG1	NUF2	9606.ENSP00000377536	9606.ENSP00000271452	0	0	0	0	0.806	0	0	0.518	0.902
PTTG1	CCNA2	9606.ENSP00000377536	9606.ENSP00000274026	0	0	0	0	0.896	0	0	0.634	0.96
PTTG1	BUB1B	9606.ENSP00000377536	9606.ENSP00000287598	0	0	0	0	0.82	0.395	0	0.83	0.979
PTTG1	CCNB2	9606.ENSP00000377536	9606.ENSP00000288207	0	0	0	0	0.934	0	0	0.631	0.974
PTTG1	MELK	9606.ENSP00000377536	9606.ENSP00000298048	0	0	0	0	0.857	0	0	0.345	0.902
PTTG1	TPX2	9606.ENSP00000377536	9606.ENSP00000300403	0	0	0	0	0.913	0	0	0.392	0.944
PTTG1	BIRC5	9606.ENSP00000377536	9606.ENSP00000301633	0	0	0	0	0.906	0	0	0.519	0.952
PTTG1	BUB1	9606.ENSP00000377536	9606.ENSP00000302530	0	0	0	0	0.85	0	0	0.739	0.959
PTTG1	AURKB	9606.ENSP00000377536	9606.ENSP00000313950	0	0	0	0	0.833	0	0.9	0.69	0.994
PTTG1	CDKN3	9606.ENSP00000377536	9606.ENSP00000335357	0	0	0	0	0.907	0	0	0.177	0.92
PTTG1	UBE2C	9606.ENSP00000377536	9606.ENSP00000348838	0	0	0	0	0.935	0.27	0.3	0.706	0.989
PTTG1	RRM2	9606.ENSP00000377536	9606.ENSP00000353770	0	0	0	0	0.833	0	0	0.512	0.915
PTTG1	CENPF	9606.ENSP00000377536	9606.ENSP00000355922	0	0	0	0	0.856	0	0	0.608	0.941
PTTG1	KIF2C	9606.ENSP00000377536	9606.ENSP00000361298	0	0	0	0	0.87	0	0	0.474	0.929
PTTG1	CDC20	9606.ENSP00000377536	9606.ENSP00000361540	0	0	0	0	0.931	0.914	0.6	0.957	0.999
PTTG1	CDCA8	9606.ENSP00000377536	9606.ENSP00000362146	0	0	0	0	0.904	0	0	0.586	0.958
PTTG1	KIF4A	9606.ENSP00000377536	9606.ENSP00000363524	0	0	0	0	0.789	0	0	0.55	0.901
PTTG1	NUSAP1	9606.ENSP00000377536	9606.ENSP00000453403	0	0	0	0	0.859	0	0	0.47	0.922
PTTG1	TOP2A	9606.ENSP00000377536	9606.ENSP00000411532	0	0	0	0	0.852	0	0	0.519	0.926
PTTG1	PBK	9606.ENSP00000377536	9606.ENSP00000428489	0	0	0	0	0.908	0	0	0.374	0.94
PTTG1	KIF20A	9606.ENSP00000377536	9606.ENSP00000378356	0	0	0	0	0.916	0	0	0.437	0.951
PTTG1	CDK1	9606.ENSP00000377536	9606.ENSP00000378699	0	0	0	0	0.941	0.213	0	0.736	0.986
PTX3	TNFAIP6	9606.ENSP00000295927	9606.ENSP00000243347	0	0	0	0	0.147	0.417	0	0.977	0.988
PTX3	CFH	9606.ENSP00000295927	9606.ENSP00000356399	0	0	0	0	0.065	0.877	0	0.963	0.995
RAD51AP1	TOP2A	9606.ENSP00000228843	9606.ENSP00000411532	0	0	0	0	0.824	0	0	0.525	0.913
RRM2	AURKA	9606.ENSP00000353770	9606.ENSP00000216911	0	0	0	0	0.825	0	0	0.51	0.91
RRM2	NCAPG	9606.ENSP00000353770	9606.ENSP00000251496	0	0	0	0	0.925	0	0	0.431	0.955
RRM2	CCNB1	9606.ENSP00000353770	9606.ENSP00000256442	0	0	0	0	0.902	0	0	0.593	0.958
RRM2	CMPK2	9606.ENSP00000353770	9606.ENSP00000256722	0	0	0	0	0.158	0.056	0.9	0.153	0.923
RRM2	KIF11	9606.ENSP00000353770	9606.ENSP00000260731	0	0	0	0	0.934	0	0	0.628	0.974
RRM2	NDC80	9606.ENSP00000353770	9606.ENSP00000261597	0	0	0	0	0.906	0	0	0.293	0.931
RRM2	ASF1B	9606.ENSP00000353770	9606.ENSP00000263382	0	0	0	0	0.843	0.257	0	0.345	0.917
RRM2	CCNA2	9606.ENSP00000353770	9606.ENSP00000274026	0	0	0	0	0.93	0	0	0.522	0.965
RRM2	BUB1B	9606.ENSP00000353770	9606.ENSP00000287598	0	0	0	0	0.957	0	0	0.508	0.978
RRM2	CCNB2	9606.ENSP00000353770	9606.ENSP00000288207	0	0	0	0	0.909	0	0	0.587	0.961
RRM2	MELK	9606.ENSP00000353770	9606.ENSP00000298048	0	0	0	0	0.925	0.059	0	0.427	0.956
RRM2	KIAA0101	9606.ENSP00000353770	9606.ENSP00000300035	0	0	0	0	0.917	0	0	0.325	0.941
RRM2	TPX2	9606.ENSP00000353770	9606.ENSP00000300403	0	0	0	0	0.923	0	0	0.414	0.953
RRM2	BIRC5	9606.ENSP00000353770	9606.ENSP00000301633	0	0	0	0	0.887	0	0	0.557	0.947
RRM2	TK1	9606.ENSP00000353770	9606.ENSP00000301634	0	0	0	0	0.731	0	0	0.672	0.908
RRM2	BUB1	9606.ENSP00000353770	9606.ENSP00000302530	0	0	0	0	0.912	0	0	0.454	0.95
RRM2	AURKB	9606.ENSP00000353770	9606.ENSP00000313950	0	0	0	0	0.921	0	0	0.394	0.95
RRM2	TYMS	9606.ENSP00000353770	9606.ENSP00000315644	0	0	0	0	0.921	0.056	0	0.671	0.973
RRM2	KIF15	9606.ENSP00000353770	9606.ENSP00000324020	0	0	0	0	0.889	0	0	0.193	0.906
RRM2	UBE2C	9606.ENSP00000353770	9606.ENSP00000348838	0	0	0	0	0.921	0.062	0	0.561	0.964
RRM2	HJURP	9606.ENSP00000353770	9606.ENSP00000414109	0	0	0	0	0.885	0	0	0.261	0.911
RRM2	PTTG1	9606.ENSP00000353770	9606.ENSP00000377536	0	0	0	0	0.833	0	0	0.512	0.915
RRM2	DTL	9606.ENSP00000353770	9606.ENSP00000355958	0	0	0	0	0.854	0.137	0	0.411	0.919
RRM2	NEK2	9606.ENSP00000353770	9606.ENSP00000355966	0	0	0	0	0.879	0	0	0.403	0.924
RRM2	CDC45	9606.ENSP00000353770	9606.ENSP00000405726	0	0	0	0	0.898	0	0	0.355	0.932
RRM2	KIF2C	9606.ENSP00000353770	9606.ENSP00000361298	0	0	0	0	0.915	0	0	0.395	0.946
RRM2	CDCA8	9606.ENSP00000353770	9606.ENSP00000362146	0	0	0	0	0.916	0	0	0.402	0.948
RRM2	CENPF	9606.ENSP00000353770	9606.ENSP00000355922	0	0	0	0	0.915	0	0	0.465	0.952
RRM2	KIF20A	9606.ENSP00000353770	9606.ENSP00000378356	0	0	0	0	0.928	0	0	0.398	0.955
RRM2	PBK	9606.ENSP00000353770	9606.ENSP00000428489	0	0	0	0	0.936	0	0	0.393	0.959
RRM2	MKI67	9606.ENSP00000353770	9606.ENSP00000357643	0	0	0	0	0.923	0	0	0.596	0.967
RRM2	NUSAP1	9606.ENSP00000353770	9606.ENSP00000453403	0	0	0	0	0.924	0	0	0.595	0.968
RRM2	CDC20	9606.ENSP00000353770	9606.ENSP00000361540	0	0	0	0	0.925	0.058	0	0.588	0.968
RRM2	TOP2A	9606.ENSP00000353770	9606.ENSP00000411532	0	0	0	0	0.935	0	0	0.671	0.978
RRM2	CDK1	9606.ENSP00000353770	9606.ENSP00000378699	0	0	0	0	0.972	0.463	0	0.546	0.992
RSAD2	OAS3	9606.ENSP00000371471	9606.ENSP00000228928	0	0	0	0	0.786	0.335	0.9	0.635	0.994
RSAD2	EGR1	9606.ENSP00000371471	9606.ENSP00000239938	0	0	0	0	0	0	0.9	0.124	0.908
RSAD2	IRF1	9606.ENSP00000371471	9606.ENSP00000245414	0	0	0	0	0.141	0	0.9	0.7	0.972
RSAD2	CMPK2	9606.ENSP00000371471	9606.ENSP00000256722	0	0	0	0	0.908	0	0	0.728	0.974
RSAD2	OAS2	9606.ENSP00000371471	9606.ENSP00000342278	0	0	0	0	0.788	0.335	0.9	0.7	0.995
RSAD2	IFI6	9606.ENSP00000371471	9606.ENSP00000342513	0	0	0	0	0.733	0	0.9	0.653	0.989
RSAD2	STAT1	9606.ENSP00000371471	9606.ENSP00000354394	0	0	0	0	0.675	0	0.9	0.69	0.989
RSAD2	GBP2	9606.ENSP00000371471	9606.ENSP00000359497	0	0	0	0	0.122	0	0.9	0.515	0.953
RSAD2	ISG15	9606.ENSP00000371471	9606.ENSP00000368699	0	0	0	0	0.825	0	0.9	0.883	0.997
RSAD2	OAS1	9606.ENSP00000371471	9606.ENSP00000388001	0	0	0	0	0.795	0	0.9	0.71	0.993
RSAD2	MX1	9606.ENSP00000371471	9606.ENSP00000381601	0	0	0	0	0.871	0	0.9	0.831	0.997
RUNX1	THBS1	9606.ENSP00000300305	9606.ENSP00000260356	0	0	0	0	0.076	0	0.9	0	0.903
RUNX1	NR4A3	9606.ENSP00000300305	9606.ENSP00000482027	0	0	0	0	0	0	0.9	0.071	0.903
RUNX1	SOCS3	9606.ENSP00000300305	9606.ENSP00000330341	0	0	0	0	0.065	0	0.9	0.064	0.904
S100A11	ANXA2	9606.ENSP00000271638	9606.ENSP00000346032	0	0	0	0	0.543	0.157	0	0.988	0.995
S100A11	ANXA1	9606.ENSP00000271638	9606.ENSP00000366109	0	0	0	0	0.432	0.683	0	0.989	0.998
S100A4	EGFR	9606.ENSP00000357705	9606.ENSP00000275493	0	0	0	0	0	0.737	0	0.693	0.915
S100A4	ANXA2	9606.ENSP00000357705	9606.ENSP00000346032	0	0	0	0	0.199	0.835	0	0.995	0.999
S100A8	MET	9606.ENSP00000357722	9606.ENSP00000317272	0	0	0	0	0	0	0	0.987	0.987
S100A8	S100A9	9606.ENSP00000357722	9606.ENSP00000357727	0	0	0	0.801	0.995	0.95	0.9	0.987	0.999
S100A9	S100A8	9606.ENSP00000357727	9606.ENSP00000357722	0	0	0	0.801	0.995	0.95	0.9	0.987	0.999
SAA1	TIMP1	9606.ENSP00000384906	9606.ENSP00000218388	0	0	0	0	0.084	0	0.9	0.369	0.937
SAA1	LIF	9606.ENSP00000384906	9606.ENSP00000249075	0	0	0	0	0.065	0	0.9	0.067	0.905
SAA1	MMP9	9606.ENSP00000384906	9606.ENSP00000361405	0	0	0	0	0.062	0	0.9	0.418	0.94
SAA1	VEGFA	9606.ENSP00000384906	9606.ENSP00000478570	0	0	0	0	0	0	0.9	0.342	0.931
SCIN	C3	9606.ENSP00000297029	9606.ENSP00000245907	0	0	0	0	0.063	0	0	0.945	0.947
SDC1	COL1A1	9606.ENSP00000370542	9606.ENSP00000225964	0	0	0	0	0.141	0	0.9	0.181	0.923
SDC1	CHI3L1	9606.ENSP00000370542	9606.ENSP00000255409	0	0	0	0	0	0	0	0.961	0.961
SDC1	THBS1	9606.ENSP00000370542	9606.ENSP00000260356	0	0	0	0	0.096	0	0.6	0.935	0.974
SDC1	COL1A2	9606.ENSP00000370542	9606.ENSP00000297268	0	0	0	0	0.079	0	0.9	0.17	0.916
SDC1	COL6A2	9606.ENSP00000370542	9606.ENSP00000300527	0	0	0	0	0.076	0	0.9	0.122	0.911
SDC1	COL3A1	9606.ENSP00000370542	9606.ENSP00000304408	0	0	0	0	0.093	0	0.9	0.156	0.916
SDC1	MET	9606.ENSP00000370542	9606.ENSP00000317272	0	0	0	0	0.138	0	0.9	0.386	0.942
SDC1	FN1	9606.ENSP00000370542	9606.ENSP00000346839	0	0	0	0	0.117	0	0.8	0.988	0.997
SDC1	COL4A2	9606.ENSP00000370542	9606.ENSP00000353654	0	0	0	0	0.126	0	0.9	0.15	0.919
SDC1	COL5A1	9606.ENSP00000370542	9606.ENSP00000360882	0	0	0	0	0.098	0	0.9	0.15	0.916
SDC1	MMP9	9606.ENSP00000370542	9606.ENSP00000361405	0	0	0	0	0	0	0.9	0.851	0.984
SDC1	COL5A2	9606.ENSP00000370542	9606.ENSP00000364000	0	0	0	0	0.076	0	0.9	0.082	0.907
SDC1	COL4A1	9606.ENSP00000370542	9606.ENSP00000364979	0	0	0	0	0.09	0	0.9	0.15	0.915
SDC1	CCL5	9606.ENSP00000370542	9606.ENSP00000474412	0	0	0	0	0.062	0.27	0.9	0.455	0.957
SDC1	CXCL1	9606.ENSP00000370542	9606.ENSP00000379110	0	0	0	0	0	0	0	0.961	0.961
SDC1	VEGFA	9606.ENSP00000370542	9606.ENSP00000478570	0	0	0	0	0.076	0	0	0.965	0.967
SERPINE1	PLAT	9606.ENSP00000223095	9606.ENSP00000220809	0	0	0	0	0.147	0.937	0.8	0.99	0.999
SERPINE1	TGIF1	9606.ENSP00000223095	9606.ENSP00000327959	0	0	0	0	0.066	0	0.9	0.144	0.913
SERPINE1	PLAUR	9606.ENSP00000223095	9606.ENSP00000339328	0	0	0	0	0.162	0	0.9	0.989	0.999
SERPINE1	PLAU	9606.ENSP00000223095	9606.ENSP00000361850	0	0	0	0	0.214	0.976	0.9	0.989	0.999
SERPING1	C1S	9606.ENSP00000278407	9606.ENSP00000385035	0	0	0	0	0.445	0.507	0.8	0.988	0.999
SERPING1	C1R	9606.ENSP00000278407	9606.ENSP00000438615	0	0	0	0	0.698	0.33	0.8	0.986	0.999
SERPINH1	COL1A1	9606.ENSP00000434412	9606.ENSP00000225964	0	0	0	0	0.4	0.183	0.6	0.665	0.925
SERPINH1	COL4A2	9606.ENSP00000434412	9606.ENSP00000353654	0	0	0	0	0.337	0.547	0.6	0.4	0.918
SGOL2	KIF2C	9606.ENSP00000350447	9606.ENSP00000361298	0	0	0	0	0.324	0.27	0	0.952	0.974
SHCBP1	NCAPG	9606.ENSP00000306473	9606.ENSP00000251496	0	0	0	0	0.947	0	0	0.066	0.948
SHCBP1	CCNA2	9606.ENSP00000306473	9606.ENSP00000274026	0	0	0	0	0.926	0	0	0.258	0.943
SHCBP1	TOP2A	9606.ENSP00000306473	9606.ENSP00000411532	0	0	0	0	0.889	0	0	0.151	0.901
SHCBP1	CDCA8	9606.ENSP00000306473	9606.ENSP00000362146	0	0	0	0	0.856	0	0	0.554	0.933
SHCBP1	KIF20A	9606.ENSP00000306473	9606.ENSP00000378356	0	0	0	0	0.916	0.152	0	0.204	0.939
SKA3	CCNB1	9606.ENSP00000319417	9606.ENSP00000256442	0	0	0	0	0.651	0	0.72	0.298	0.925
SKA3	NDC80	9606.ENSP00000319417	9606.ENSP00000261597	0	0	0	0	0.826	0	0.72	0.701	0.984
SKA3	BUB1B	9606.ENSP00000319417	9606.ENSP00000287598	0	0	0	0	0.729	0.177	0.9	0.472	0.986
SKA3	BUB1	9606.ENSP00000319417	9606.ENSP00000302530	0	0	0	0	0.759	0	0.72	0.458	0.96
SKA3	CENPF	9606.ENSP00000319417	9606.ENSP00000355922	0	0	0	0	0.587	0	0.9	0.511	0.978
SMC4	NCAPH	9606.ENSP00000349961	9606.ENSP00000240423	0	0	0	0	0.992	0.992	0.9	0.936	0.999
SMC4	NCAPG	9606.ENSP00000349961	9606.ENSP00000251496	0	0	0	0	0.997	0.992	0.9	0.967	0.999
SMC4	CCNB1	9606.ENSP00000349961	9606.ENSP00000256442	0	0	0	0	0.617	0.06	0.9	0.428	0.976
SMC4	KIF11	9606.ENSP00000349961	9606.ENSP00000260731	0	0	0	0	0.966	0.122	0	0.435	0.981
SMC4	NDC80	9606.ENSP00000349961	9606.ENSP00000261597	0	0	0	0	0.95	0.248	0	0.56	0.982
SMC4	NUF2	9606.ENSP00000349961	9606.ENSP00000271452	0	0	0	0	0.783	0.137	0	0.594	0.917
SMC4	CCNA2	9606.ENSP00000349961	9606.ENSP00000274026	0	0	0	0	0.819	0.06	0	0.507	0.909
SMC4	BUB1B	9606.ENSP00000349961	9606.ENSP00000287598	0	0	0	0	0.848	0.106	0	0.454	0.919
SMC4	CCNB2	9606.ENSP00000349961	9606.ENSP00000288207	0	0	0	0	0.607	0.06	0.9	0.438	0.976
SMC4	BUB1	9606.ENSP00000349961	9606.ENSP00000302530	0	0	0	0	0.868	0.106	0	0.559	0.943
SMC4	AURKB	9606.ENSP00000349961	9606.ENSP00000313950	0	0	0	0	0.823	0.128	0.9	0.672	0.994
SMC4	KIF15	9606.ENSP00000349961	9606.ENSP00000324020	0	0	0	0	0.901	0.122	0	0.318	0.935
SMC4	NUSAP1	9606.ENSP00000349961	9606.ENSP00000453403	0	0	0	0	0.852	0	0	0.387	0.906
SMC4	MKI67	9606.ENSP00000349961	9606.ENSP00000357643	0	0	0	0	0.914	0.153	0	0.218	0.938
SMC4	PRC1	9606.ENSP00000349961	9606.ENSP00000377793	0	0	0	0	0.883	0.289	0	0.343	0.94
SMC4	TOP2A	9606.ENSP00000349961	9606.ENSP00000411532	0.044	0	0	0	0.919	0.243	0	0.737	0.982
SMC4	CDK1	9606.ENSP00000349961	9606.ENSP00000378699	0	0	0	0	0.906	0.321	0.9	0.52	0.996
[truncated: 240 more rows]
